# Supplementary material
Source: publisher figshare collection journal article supplement (https://gsajournals.figshare.com/ndownloader/files/24955325)
Supplement: Supplementary file 1 [file 24955325]

>g2420.t1
MAVGRRVVVGCEAVIAIVGVDGGLSGRGGDIGRIWRIVVAAGCWAIGGAVLCRLSSSGGG
VVMAVHGGLVVNLLLWVSELLMVGQFVGWQLNSGDWGSAVLGEIGGSCG*

>g42914.t1
MAISAAVTGLNRPISPYLSAPRLHSTGRKQFFLKVSSASSNTSDGTEERKMIIKKDKDGF
PKRDESIYDAFGAGHSSTSISAGLGMAVGRDLLGKNNNVISVVGDGAMTAGQAYEAMNNA
AFLDANLVVILNDNKQVSLPTATLDGPATPVGALSSALSKLQASRKFRQLREAAKKGKGY
PPAEAAADKMHGVVKFDPKTGKQFKSKSPTLSYTQYFAEALIKEAEVDNKIVAIHAAMGG
GTGFNYFQKRFPDRCFDVGIAEQHAVTFAAGLATEVLKPFCAIYSSFLQRGYDQVVPDVD
LQKLPVRFVMDRAGLVGADGPTHCGAFDVAYMACLA*

>g23801.t1
MIIRHTIVSPLLVLAFVHYSLERPLLPPPFTVDGSSFCTTATKLCLQELSSQQEYLKLKA
RYEALQRSQRNLLGEDLGPLNSKELESLERQLDMSLKQIRSTREHALNEANKTLKQRLME
GNQVNLQWNPNAQEMGYGRQPAQTQGDAFFHPLECEPTLQIGYQTDPITVAAAGPSVNNY
MAGWLP*

>g21752.t1
MLFFYNLPADLLFSVCNKKRVSHSIQSFCTVGHGGSDGLHAYVHSLNDAVDYTAVLDPEV
KARITGVVMTSPAVGLQPSRPIFAVRMISLFDKCYLADLHLLLFKHLFRIL*

>g30574.t1.2.5bbdf93b
MQASVQCRPQDRTLGMVMKEVEGDLAIFLEMRKREKERDDLVLLESSCDGFDDSTASNPD
SSVDTMFTKTAHKTTPADNFLDAESEKSDYDWLLTSPDTPSLPLLEMGVHNASSQTAIAN
ALSTAGISEPENPPDEPSTLNNTSARPITSTDKHSSASRNRKASSSGGQKSTAYRSATPT
RKSALPAALKPSRSSMPAAKDITASNKPIAPPVRSSTPSKATARSSTPPARSLISSASKS
ASRSTTPTCKSSIPPSATSISAPSDRSSSVTKTVPTTSKHPGTSSGAFPAVKARPKKMAE
KPILPSNAPSNLKIVVPKRPSSASRGRPTASNSLSSSIDSTTGIPRQKSCSPSRGRGNDG
AFNGGTAVLSKSRGYSNIGDDVNPVLIGTKMVERVVNMRKLAPPKHGNHESQDNSSGKSS
LSQDNSGFGRSLSKKSLDMAIRHMDIRGISGKVKTMVTSLPASNVLGVQSGSTRNRTASL
SDSSLATCSSASSEPSVNDGTHVLDGCNVEFNDTGSKTEYSSPTS*

>g67868.t1
MICCGKLKLVHNASFFVPFISVNGKYYVQPEQLNKIFELCGSPDEKNWPEVSKIPWYNNF
KPSRPLKRRLKEVFRHFDRHALELLDKMLTLDPLQRISAKDALDAEYFWTDPLPCDPKSL
PKYESSHEFQTKKKRQQQRQHEETAKRQKLQHQQQHARLPQHQQSGQGHPQMRPGPNPPM
HGPQNQVVGGPSHHYNKPRGPSGGPGRYPQAGNPSGGYNHPNRGQGGGGYGSGPYPPQGR
AGPYGSSGISGAGPRGGGAGGYGTGGPNYPHGGQYGGSGAGRGSNMMPGNRNQQYNWQQ*

>g72899.t1
MGSLHENNVSFSPLQVGEFKPLDPKEFRRQAHQMVDFIADYYENIEKHPVLSQVEPGYLR
NRLPESAPYRPEPFENILRDVQNDIIPGMTHWLSPNFFAFFPATVSTAAFVGEMLCTCFN
AVGFNWLASPATTELEMVVMDWLAQLLKLPKSFMFSGSGGGVIQGTTSESILCALIAARD
RALESLGVHGISKLVVYCSDQTHSTYSKACKLAGIFPCNIRIIPTTADDNFALSPDILRA
VIEADVATGLFPLFLCATVGTTSTTAIDPVSQLAQVANHYNVWFHVDAAYGGSACICPEF
REYLDGVERVDSLSLSPHKWLLSYLDCCCLWVKQPNLLVKALNTNPEYLRNKRSELDSVV
DYKDWQVGTGRRFKALRLWLIMRSYGVANLQSHIRSDVKMAKMFEGFVKSDPWFEVVVPR
TFSLVCFRFNPFKESDPTYIELLNKKLLDSVNSTGRLYITHTVAGEVYMLRFAVGATLTE
DRHVYAAWKLIKESAEALLKRSHYIV*

>g54.t1
MSSATAFKFHTIKEKLGFSSENFALCRLCKILLISGLILSVILVLFFNDPRCSNPTFFSP
LKEKGSSSSSSSNSTSTDDPTDVHHIAFGIQGSEKTYHFRKAYIEAWWRPKITRGFVYLD
KPPTGDLLPWSRKSPPYRVNDDLSKLIQQVKPNNPLMPRMVHGILELFREEHEGIRWIIM
GDDDTIFFVDNLLHVLSKYDHTKYYYIGYPSEFVLSNYWYSFNQAFGGGGIILSYPLAKA
LVRDMDRCLEKYASLSADLMTMTCLADIGVNLTPHKGVHQIDLRGDLSGFLSSHPKDLVL
SLHHIDTVDPYFPSMNRAQSTHHLMKAGNVDQSRLFQQTICYHRQRNWSFSIAWGYSAHI
YEKIFARSWLTMPIETFKTWQNSQDPPHFMFNVRRPFGDSCEAPHVFFFESIKKTSRNEI
LTVYSRSAPRNLTACASSGNHSAEYISKIYVASPGTKRTEIHRSECCDVVRVEESGKAEV
KFRECMADEIIA*

>g56374.t1
MSQVFEGYERQYCELSTNLSKKCTSASILAGEQKKQKIFEVKAGLDDADALVATDQRGRL
LMSTERLNQSSDRIRESRKLMLETEDLGVSILQDLHQQHQSLLHAHNTLHGVDDNISRSK
KILTNMSRRMSRNKWIIGSIIAVLVLAIILIIYFKLTH*

>g6060.t1.1.5bbdf938
MAPDSTTDDTKKNQQPGGNATSASGNTSIDDAAVALDQPPPQVSLKDFPYSKDTETEKGN
SDVIKKDVLPPCDHGGNSDEILMQERDKPLDIQSKGLADLPEENHCVYSPGALPGDSQTS
YFEIQSQKIDGKGLDDPNQDQDSVILKERSLDVKAQPQEVGVTGPEEMDINTGLTRVESS
SVIEPNEGKLISEVNDVEEKCLSKEMPALEMVPEDETKKMEVELSNEVEGEFVNPEQNVQ
PEADVKTAANMFLPDKIAFLGNESETQENQVAFMKELEAFHKERFLEFKPPKFYGEPLNC
LKLWRAVIKLGGYEQVTASKLWRQVGESFNPPKTCTTVSWTFRGFYEKALLEYEKHKLRC
GELPFTDASSAEPSVTCNQAGLSQSSGSGRARRDAAARAMQGWHSQRLLGNGEVGDPIIK
DKNSVSTSKREKQLKSVGLLKRKKVSPVDHPLHIANLKASKPQLETMVVDVGAPADWVKI
NVQRTKDCFEVYALVPGLLREEVRVQSDPAGRLVISGQPEQLDNPWGVTPFKKVVSLPSR
IDPHQTSAVVTLHGQLFVRVPFEQTDI*

>g20534.t1
MYHVAKASEFLAITGVTINDIKITKKAIVWPFQKCRVIDVTPVNYTFEVNAMSAEKLLFL
LPAVFTIGPRVDDHDSLVKYAKLLSDHSRDSHNVKELVQGVIEGETRVLAASMTMEEIFR
GTKDFKKAVFEKVQLELNQFGLLIYNSNIKQLVDVRGHEYFSYLGQKTQMEAANQAKVDV
AEAKMKGEIGAKERQGRTLQNAAKIDAETKIISTQREGEGKKQEIMVKSQVKIYENQREA
DVAEANAVLATKKAAWAQQAKMAEVEAEKAVAIREAELQMEVEKKNALAKTEQLKAEELS
QATVEYEIKVQEANAVLYKKQKEAEAVLYEKQKAADAQKVTAEAQLYAIQQAADAELYAK
KKEAEGMVAIAEAQGIYIRTLMQSLGGNYNALRDYLMINGGMFKDIAKINAEAIKGLQPK
ISVWANGGEARDGAVTGTGNAAMSEIASVYRALPPLFQTVHEQTGMSPPAWMGSLPSSSS
AEKALSNQPE*

>g43134.t1.2.5bbdf935
MLLPKPLGLSLSSSSSSSLSTLSVFPFPHQLLLHPYHSLIKFTSSKPYFFVICKSGGRSQ
ARQDTKPQIPHYPDPEPEADGSGAAAPTRGEIFLERHQSSMAASTVLLSTSKNKKKKKDK
DKVLKVYSVLPSCYGCGAPLQTSDTDVPGYVDPDTYELVIIPRKNIVNLELFFVGGAAFC
LMET*

>g55053.t1
MMAPPTPRRKKWSEVEERTLIDKYEEMICDGTLAKMKTREKRFKPIAIYVNSVHHVRDPI
TYPWQWSWKDVSVKVQNMRHQYALVKQKIKKVESVGDVGGEEEFDWLEGLVHWSNFLRYK
EVFGDLDVVLNSSSSLAVAGGCNDNDGGFEAGVHEMDIVPFEHLGHVVDGEFGHGLEGVD
NGAIGLEFDYGGEEGEENFNGGDRSQSHVKEDADDGFVYEDIEPTGSDTRKKRKVSKGLE
KKAWSFLANQLMRLREMETRFEQGENDRKLERRRRECLRMEAEQEREKRWEEREKEREER
EKCREKLRRQRIQEWEAMEKESEEWNRRRREDELMYERQWEGRMNRSRSEWKKQIDEMLS
QHRAEISQMQSRLVHEQQSLTSQLLGVVSQWTGHPTGLSDHTGASSHYLSQMMQILHHSN
GLVHGDSRIEGDNHEDQFIVDGQ*

>g65026.t1
METSNSSSSDAHTNSSGSNSTSSSPMDSNNSGSSRGYGIQFPPPLRFFRSPVSSLLEYSG
LLRIRPDISEAHPLIVDHSNSNSNISANGVVSASTTTAARSSSGSGVTSSNGEVSIRIIG
AGEGDRVVLGDDVGDEQSVGLGSSVDGGGHDRNLSGAEDIGAEGSGTNGGSRGESSYQRY
DIQQFARWIEQILPFSLLLLVVFIRQHLQGFFVTIWITAFMFKSNDILRKQTALKGERKM
LVLVTYFAVFILHVFGIYWWYRNDDLYYPLFMVPPKSIPPFWHAIFIILVNDTMVRQMAM
ALKLVLLMYYKNGRGHNFRRQGQMLTLVEYTLLLYRALLPTPVWYRFFLNKEYGSLFSSL
TTGLYLTFKLTSVVEKVQSFLAALKALSRKEIHYGCYATSEQVNAAGDLCAICQEKMHAP
ILLRCKHIFCEDCVSEWFERERTCPLCRALVRPADLRSFGDGSTSLFMQMF*

>g51333.t1
MRLYITILVVLVHQILAGIGPTNAAARGLFFTSTIAGSDHKNSTSTNNAGISSSSSEDDA
TSTAISRCYNSFRLHFSRYSSEAWKNKIDDDKRMVPTGPNPLHNR*

>g74025.t1.1.5bbdf93e
MAETSSRDEWQGKELGTRGGKAVHMLIHHSRNTAQKQWDETLVLVLGGIARILRSFFPFL
RDLKNFHSGWESLLIFVKNSILSGSKEVALAAINCLQSTVISHSPKGNLPLPYLRSVLDV
YGLVLQKLPSCSDSASSKVKQEILHGLGELYVQAQGMFDSGMYKQLLAVIDTAIKEAQLT
SNNFEAEYGNVPPVQRTALDILPLLRPTGHLSAMWLLLIGKLLEYLPKSSSDTNNMKEVP
NGNISTPQKKDQASPTSLESVTNSSYQFAEKLVSVLVDLFLQAPATEKYNICPETIQGLG
RCMTTRRDNPDGSLWRVAVDGFNRILVDDVSKVNVDSHADLTFPQPARIRVWKEVADVYE
TFLVGHCGRALPSSALSAAVLKADEFLEMKVLDILGDRILKSQIDAPLDILQRLVSTLDR
CASRTCSLPVETVELMPSYCSRFSLTCLQKLFSLSSYNRGTMDWNLTRSAVSKVSIMILM
SRCEFVLKKFLIDENDLGERPLPNARVEEIIFVLQELARLVIHSDTASTLPLNHSLKKGL
LDENGGRTHLLVLFPSFCELVISRESRVRELVQVLLRLISAELGLQKLNLAG*

>g68865.t1
MEGKSCQERKSNRSALSNYRLGKTLGVGAFAKVKLAVHNLTGIKVAIKILDRQTLDENET
MKVKREINIMRRLSHPHIVRLFEVIETTSHIYVVMEYMNSGELFYYITEKGRVHEDEARH
FFQQIISGIEYCHRHTVVHRDLKPENLLLDSKRNVKIADFGLGNIMRDGHFLKTSCGSPN
YAAPEVVANRLYAGPEADVWSCGVILYALICGRLPFDDDNLSGLYAKIRNGTYTISNHMS
RSASDLIARIFVVNPVNRISIPEIRQHPWFQEHIPQYIASRTIDTLYDTTKVDEEVVREM
VKMGFDIHEVIGSLFNHLQNQITVTYYLLLHRQFQVRFTYDKSELLESPSQDLLYCSEIF
LRSVSTLETKWTLGFKSQASPHQTMTEVLKIFHSINVQWKRIGPYNMKCLWQPPCSKYLK
GKFVDEFPQIPQTNSVNGKVLPSAATNGMSIRSDDSVKFEVQLYKGGGEMYVVDLQWLNG
PPFLFLEICASFLFAVRVL*

>g61942.t2.13.5bbdf936
MKEIDLLQNAMDSKQFFTNGAIESQESPTTSAHVKRTVSLEKFLRRRCSPRLKDIPQSKR
PYYGTSIKVLRQHYDDNASSFDDYNVQQRDPPNGITQNAARSDPVNDSGSTNVDLTSSSG
DRQCTIVEPFNNNCIRSFTSSPTLDGKSSYALVKETIRTFDTYYLHLVQEEQIIRNKEED
SLQNDARDLNQEVGFAERRTLVAPPKLRGVLCMDISGGQEEIRIPVINLVDDMPFAATGF
TYSRSIQVAENVDLPPIADGCRCKGNCMHPKNCACARLNDSKFPYVRHNGGRLRKAKGVV
FECGPNCGCGPDCINRISQQGIKYQLEVFRTLDKGWAVRTKDFIPSGAPVCEYVGILRRT
DELDNVDVNDYIFEIDCLHTIKGIEGREVYLFKKQNIFLLMCLCVFVRMASYFLLSVIKD
*

>g18731.t1.2.5bbdf93e.1.5bbe1a05
MATTNNSVQVPLMAENHPSSLSSSDDLSDTVLDKHMAKLETFLRVFGFCQDSFLSTALSW
LAFALFAILLPLWTVYYAYCSNCEHYQIRTFELEIFTSQSVVAAISLLCISHNLRKYGVR
KLLFVDRCHGHIAQFRQQYIQRIQVFYRLVITWVVICFVLKTAREVTRAVYLRDEFWWWS
VIILVASLVSWAYSTMLFLLGTALFNLVGNLQVINFENYGKLLERDLDISVYIEEHMRLT
YNLSKISHRFRVFLLLEFLAVSASQFVALLQTTGNKGIINFINGGDFAVSISFYPIL*

>g48861.t1
MATLQKFKLLATQCAVAGSPTRSPSASPVIHLRRRKTLRMLLNRGGSGSRRISRREVGSP
DRRGSQRESPEKAKELEVSHKLRDLFVSSPPPSFDERDSDSDRDGFLSGGVSGGGGGSGG
GGFGLRRGGGGGARPLRPLSATFRQRLLRRAWRPVLVTIPE*

>g11896.t1
MADFVNYRDNESDSEVESDSEEVGEASVGEEVEVANDGEVVEVANDSEKQSDGESREAEE
ECFAGAHQTDKEEEHDDDVQDDNDRDYN*

>g37802.t1
MQTSSFHNFNRTDKRGKKKSIQNIDGIIISNMNLPSEILTEILRRLPVKSLIRFKCVNKS
WCAFINSPEFIALHLSHVNSNNTKQHLLLLIELFIEDVYKNVLSLRSNNESLSITAPDLE
LPSLFLPHTEVMGPVNGILCITDRADIFLCNPALRKFRRLPPCPFGLREGFRRGRQHSGF
GYDPITNDYKFIRLVAIEEEKYYWYDNFRVKAEIYNISANSWKEFKLELAPKILLRCSFK
AVSFKGSIHWNISDRILAFNMSTEAFGEVEYPPSVHIDWRHRENCLTVLEESLTLISGIA
IPLSLFHHQERFKSIEVWMMKEYGARDSWTKMFHIKPPLETGSLLFFWNNDQELLAETRE
GQLISFDPCKGQEFRKYQVGRQSRGPFSVVPYNESLIDPNTIVSNTPLTVVTYAQSLSLI
DPKYVANDD*

>g60369.t1
MDQVLLHGTLHVTIYEVDRLHGEGGGPNIFRKLMENIEETVGFGKGTPKIYATIDLEKAR
VGRTRMIENEPNNPRWYESFHIYCGHLASNVIFTVKDDNPIGATLIGRAYVPVHELLEGE
EVDRWVEILDEDKNPIREGSKIHVKLQFFEVTRDRSWARGIRSSKFPGVPYTFFSQRTGC
RVSLYQDAHVPDNFVPRIPLSGGKVYEPHRCWEDIFDAISNAKHLIYITGWSVYTEITLV
RDSRRQKPGGDVTLGELLKKKASEGVRVLMLVWDDRTSVGVLKKDGLMATHDEETEQFFQ
GSDVHCVLCPRNPDDGGSFVQDLQISTMFTHHQKIVVVDSDMPSGESQNRRIVSFVGGID
LCDGRYDTPFHSLFRTLDTAHHDDFHQPNFTGASITKGGPREPWHDIHSRLEGPIAWDVL
FNFEQRWRKQGGKDVLVNLRELDDVIISPSPVTFPDDHETWHVQLFRSIDGGAAFGFPDT
PEDAAKAGLVSGKDNIVDRSIQDAYINAIRRAKNFIYIENQYFLGSCFGWQADDVKVEDV
GALHLIPKELSLKIVSKIEAGERFTVYIVVPMWPEGIPESGSVQAILDWQRRTMEMMYKD
VIKALSEKGLEEDPRNYLTFFCLGNREVKKSGEYEPSEQPEPDSDYIRAQEARRFMIYVH
TKMMIVDDEYIIIGSANINQRSMDGSRDSEIAMGAYQPYHLATRQPARGQIHGFRMSLWY
EHLGMLDDTFYHPESEECIRKVNQVADKYWDLFASESLERDLPGHLLRYPIGVTSEGDIT
ELPGMEFFPDTKARILGTKSDYLPPILTT*

>g5589.t1
MGSMGRMLGVGIAVGCAVAMCVVAGTMVGKRVRSRRRWRRVVKILEEFEEGCATPVEKLR
QVVDAMAVEMHAGLASEGGSKLKMLLTFVQNLPDGSEKGVYYGLDLGGTNFRVLRVQLGG
QRSAILGTDVQRQPIPEHLMTSTSEVAKFVIHMSSLILLLHHYINLLKKKEMALKFCKAK
*

>g61942.t2.1.5bbdf936
MDSKQFFTNGAIESQESPTTSAHVKRTVSLEKFLRRRCSPRLKDIPQSKRPYYGTSIKVL
RQHYDDNASSFDDYNVQQRDPPNGITQNAARSDPVNDSGSTNVDLTSSSGDRQCTIVEPF
NNNCIRSFTSSPTLDGKSSYALVKETIRTFDTYYLHLVQEEQIIRNKEEDSLQNDARDLN
QEVGFAERRTLVAPPKLRGVLCMDISGGQEEIRIPVINLVDDMPFAATGFTYSRSIQVAE
NVDLPPIADGCRCKGNCMHPKNCACARLNDSKFPYVRHNGGRLRKAKGVVFECGPNCGCG
PDCINRISQQGIKYQLEVFRTLDKGWAVRTKDFIPSGAPVCEYVGILRRTDELDNVDVND
YIFEIDCLHTIKGIEGRERRFGAISASLCDRAEKIQEGYFEKTPEFCIDANHIGNVSRFI
NHSCEPNLFVQCVLSAHHDVRLARIVLFAARSISPWQELTYDYGYPLDSVIDSDGKVKVQ
PCYCGTEDCRKRLY*

>g66396.t1
MGMDMKNIGIKRAREPEFDSLTTMANCLMLLSRAGGFEGLNIISHSSSNNSSSNHNNPSR
VFECKTCNRQFPSFQALGGHRASHKKPKLGSDLSLQPQLQTSPPKPKTHECSICGLEFAV
GQALGGHMRRHRAAMNEENGQNQSPVSSVSSGRHDPVVKKSSTGSTRVWCLDLNLTPLEN
DLEFGLGKVAAPAVDCFL*

>g33289.t1
MGFSFLHNLGLIALFRMLYVAVAQTTNKNITLGWSLIASDNSAPWPSPSGEFAFGFHRLE
NQNLYLLSIWFDKIPNKTLVWYANGDNPAPQGSKVELRRDGQFILTDPAGDEIWRPNASP
VGAAYAAMLDTGNFILANNDSSSAWQSFDNPADTLLPSQILRARGSVSARTTEKNFTRGR
FELRLIPDGNLVLNTIALPAGNAYEAYYWSNTVDAPGGMTGNQLIFDDSGSLYILKTNKE
IVNITSGNIGTSFPIRDYYQRVTIDYDGVLRLYVHPRSSRNGIWDSTWSTVWFEPKNICT
EMMGERGGGTCGFNSYCHLEADGRPSCQCLPGFNFSDPDNKLNGCDQDAILKCNLGGLRP
EDVYVMRQLDNWFWNTSSIYEELQSFSDDECRSSCLYDCHCLLAISIDGSCKKKKLPVSN
GRQPQSGSVRAFVKTLKSNIPSGDIDPRLNLGKRSQHTFSLVAEILLGSSGFVILLLVVT
MFFIILRSYDRRTKLPKLPSVLDTNLRVFTYEDLKAATSQFEEEIGRGSFGTVYKGVMQL
SSSQVLVAVKRLDKIAQEGEKEFLTEASVIAKIHHKNLVRLIGFCDEGPHKLLVYEFMSN
GSLASFLFGDSRPEWGKRIHFAYGIARGLTYLHEDCSTQIIHCDIKPQNILLDDSFTVKI
SDFGIAKLLMSNHSRTLTAIRGTKGYVAPEWFRSTPVTAKVDVYSYGVMLLEIICCRKCI
DMERENEEEVILTDWVYDCYEERTLDKLVEDDDEARSDMSQLEKLVMVAIWCIQEDPNVR
PSIKMVLHMLEGVVQVSAPPSPSPHTSAFLTSKCN*

>g75982.t1.2.5bbdf93d
MGFSKDNLRGFILALLSSGFIGASFIIKKKGLRRAAAASGVRAGVGGYAYLLEPLWWFGM
ITMIVGEVANFVAYAFAPAVLVTPLGALSIIVSAVLAHFFLREKLHQLGILGCIMCIAGS
VIIVIHAPQERSISSVQEICDMATQPAFLLYVGSVIALVFILIFYFAPQYGHTNLLVYTG
ICSLVGSLSVMSVKALGTALKLTFEGNNQLIFPETWFFMFVVATCVITQMNYLNKALDTF
NTAIVSPIYYVLFTTLTIVASIIMFKDWDGQSVGSIISEICGFIVVLSGTILLHVTKDFE
RSSSFRANYTPLSPTLSTRLCSENGEALKNDVEEGPSSEEVGSRRQELYT*

>g20427.t1.1.5bbdf93b
MTLSVPRKSQDLTFLMGFLRIILAEIELFRSLVPEPGENTEKWKLLFTHIDSVAKGVNSL
YCKFPAKEFTEEEMTTEMNLQLSHLFDKIKLIKIELNKLYLEIPRNFPKINALGFMYLLR
RKLRELINKSPCSIASVKHQIEAISEELEFLTSLLEDVEDRDIDHKKLKELGTHVVNVAY
VAEYVIDLIVVGNGATWRAISLFCCLLEEIKFVKIQAREIYENTDSVVHIVAQASRNEIS
QASTRQNDENVVDLHDQEEAIIDQLTRGSLQRDVVAIVGMPGIGKTRMANKVFNDPKVTY
HFHIRAWCHVSQAYVKRDLLLEILSNISGPTADILQMADEDLELELYRKLKQKQYLVVMD
DMWNTGAWDNLEKSLPNDGNGSRILMTSRLHDVALKAKPDSKPHPLRLLSDNESWNLLQR
KIFHEENCPDELLEIGKQISRSCRGLPLAIVAIAGLLERADRTQNWWEKIAQSISSHIVD
DPGIQCKVVLELSYKHLPDHLKACFLYFGSFHQNKDISVKRLIWLWIGEGFVQKRKEKSL
EDIAEDYLRDLIGRSLVMVAKRRSNGGVKACRVHDILHDLCQSKSKEENFSRIITRYDEP
HASFDDLDYGVGFDYYDHLHSITYDDRRLCILTKRKHFVMSRPSGAYARSLMFFATSDMY
PRCPYDVSFIPRNFKLLWVLDLECINMGPSFLPGIELLVHLRYLSVSGDIDSVPSSISNL
RNLEIFIVKGLKGKVVLPDTIWSMARLQHVHVSNHATFTLQDSELGEHFLLDNLVSLSSP
SLSNGEEAAMIIRKFPNLQKFRCIFLEPKNCSENCNSFLRLDCLTQLESLKISYFGTAPN
SSKFNLPLNLKKLTLSNFRLPWDLISAIGRLPNLEVLKLHSRAFEGEIWEMKEEEFLQLK
FLKLDTLNLVQWSASSDHLPNLQHLALRNCKQLEEVPSAFVEICTLQVIEVNGCGHSADE
LVTRIEEEGIEGLKVFINYSDSNFR*

>g7792.t2
MAMAASTSSSPHLLRKSTSLFTIKSHANFKKKDVFIVGATKITACLATRLGIRSEAVGQA
AFFRTGGTSLIQGRKVATVRTIQPVRSSSIATAVSEEEEGILSLDVSEIKAMCRSWLWRG
HKINYLVYPGGHDTTSPPPPPLLLVHGFGASIAHWRRNILILSQSYTVYAIDLLGFGASD
KPIGFAYSMEAWSQLILDFLNEIIQRPTVLIGNSVGSLACLIAAAESSHLPLIRGLVLLN
CAGGMNNKAIVDDWRIKLLLPLLWFFDFLLNQRGIASFLFDKFKQRDNIRNILMSVYGNK
DSVDEDLVEIIRGPADDEGALDAFVSIVTGPPGPNPVQLIPKLTLPILVLWGDEDPFTPI
DGPVGKFFSSLPGQVPNISLFLLNGVGHCPHDDRPDLVHARLLPWLATLPGLQDEATNLP
KAN*

>g21045.t1
MGRVYVGLVWIWFLLFMITFRARISVSARSEQEIRQRFYGNLVNSSAPDSGEGSIAKMFD
RVLEREFSSDNDQPEGSDGSSFNSSVADQQAVLETVVKITHEKTKKNDTQEANATISSKI
QDMLNIENDGSDDTTTLIDNDHNRYVMSNKKSKYPVLQVDLRLISDLVVVVVSAAIGGII
FSCLGQPVIVGYLLAGSLIGPGGLQFISEMVQVETFAQFGVVFLLFALGLEFSLTKLKVV
GPVAVLGGLLQIVILMFLCGSTALLCGAKLSEGIFIGCFLSMSSTAVVVKFLVERNSNNL
LHGQVTIGTLIFQDCAVGLLFALLPVLGGNSGVLQGMASVGKLLVTLSVYLACASLLTWS
FVPRFLKLMIQISSQTNELYQLAAVAFCLLSAWCSDKLGLSLELGSFAAGVMISTTDCAQ
HTLDQVEPIRNLFAALFLSSIGMLINVHFLWTHVDILLASVILVIVVKTTVAATITKAFG
YNIRTSVVVGLLLAQIGEFAFVLLSRASNLHLVEGRMYLLLLGTTAFSLVTTPVLFKLIP
AVIHLGVLMHWFPSEGQNEEKVSVIEAHNRLL*

>g13363.t1
MSPPKKPSRGFSFFGITAGSGGRGDRNDGKADNQPQLKLEADREVYRPGDLVTITVEIEN
PTASFSLLIEKLSFEIKGIEKLDTNWFNIPKPSPESKQRRGEYTFMDGFMPAIVSNQIIA
AGAAKRYVVRTLLPNIIPPSYRGATIRYLYYARSTLFGEYLILENGHSHRESILDLPELE
ARIPLHIWVTQKSNGLLSEEGHSDGIVPATSILLDVYWKEVDGDSEWTRANESFDGVEEG
YESSRDEILSVSSYNPIKEDIHHGFGSSLSLQSSIAMSSGKDLSYLEGRASISSNLALAR
LAVAEVLHDNSDGVLSASKSDAASQSRLLTHTRSLSLDDETRVPSGPGNIESGASEGFVR
GRSYNIRLDDQVLLRFSPKNSDSTYYFSDLIGGTLTFFHEEGTRRCLELSVTLEMTETIS
RRFVHPSRKHSPTITKVHSDHHEVVADLVQTSFLFSIPMDGPMSFSTRYVSVQWALRFEF
LTTPKNVDWTRFEHPLLIDGRDKCEWLLPITVHGPPLGTAATQIRSEKLFSLEPLWVRT*

>g128.t1.2.5bbdf940
MAGEEAKRKGSLKLDSEKLFVEEEEEEEAELSQLVVVVGKRPQSPETKRMDEEGRNDQTN
ELRNLSDKSLLETVTRMKRNLSSLIATLKDGGEKYKVHLKRHEDELERRCLQKGETVVLV
DEEELEVEEKTTQANERDSCKNTKIYYPSRDDPVSVEICYSDMDCLAPEKYLSSTIMNFY
IRYQQMEELTSKTTDEERYNYHFFNTYFYEKLKEAVAKKKIGGTSFAKFRRWWKGVNIFE
KAYILLPIHENLHWSLVIICIPDVEDCSGLIILHLDSLRLHCSKQIFNNIKSFLIEECNF
LKGEEAPLDLPIADTVLENLSGRIDEKIIERLRKG*

>g35098.t1.5.5bbdf938
MEGIIVRRVIPSDNSCLFNAVGYVMDHDKNKAPELRQVIAATVASDPTKYNEAFLGKSNE
EYCAWILDPEKWGGAIELSILAEYYGREIAAYDIQTTRCDLYGQGNKYKERVMLVYDGLH
YDALAMSPFDEAPEEFDQTIFAVQKDRTIGPVEGLVLTLVKEQQRKRNYTDTANFTLRCG
VCQIGVIGQKEAMEHAQATGHVNFQEYR*

>g55615.t2
MGNLCGKPPSIIKDREESPHGKKLARASSQSDVTRAVSSRRDESFRLKKKFNSGEIKFHM
IDRKLSGSRRVRDDYYDKNKENSGALGIYYPEAGSVPKALEGEQVAAGWPSWLASAAGEA
IKGWLPRKADTFEKLDKIGQGTYSSVYKARDLTHNKVVALKRVRFDNMDTESVKFMAREI
LILRRLDHPNVIKLEGLVTSRTSSSLYLVFEYMEHDLTGLASLPGVKFSEPQVKCYMQQL
LSGLDHCHTHGVLHRDIKGSNLLIDNHGCLKIADFGLANYDYHQKVSLTSRVVTLWYRPP
ELLLGASHYGAAVDLWSAGCILGELYAGKPIMPGRTEVEQLHKIFKLCGSPSEEYWRKTR
LPHSTVFRPLQTYKPRLAETFKDFPPAAMGLMETLLSIDPAERGSAATALKSEFFKTEPF
ACDPSTLPKYPPTKEIDAKLREEEAKRQGAQGVKGQRSDLGTSGSKELRAVPALDANADL
VSSMQRNAGQPNSKSRRELFNSHREGTARGFPADPPRLSKGVKETSKANLEHPPPERISY
SGPLGPGAGWAISGKKYDDISFVSNKADLSTLSGLVASRTLPSEDSWDKHGSQHLEMANQ
VKKSSRLSGEPARKQDQLRRIQNLSSSRHIETGRATKGPILGHPSMPSKIHFSGPLGIPP
NKVDQMLKEHDRQLQEAVRRTRIERTRIGRVEAPEMQITANPVYASTQATR*

>g27273.t1.1.5bbdf936
MTKFGELEDCIVMKERSTGRSRGFGYVTFATVEDAKAALASEHFLGNRMLEVKVATPKEE
MRAPSKKVTRIFVARIPPSVSEAAFRSYFEKYGEITDLYMPKDPSTKSHRGIGFITFANA
ESVDDLMAETHELGGSTIVVDRATPKEDEFRPVSRVPQGGYGAYNAYISAATRYAALGAP
TLYDNPGSMYGRGGPGGPPRGMGKKIFVGRLPQEASAEDLRQYFGRFGRILDVYVPKDPK
RTGHRGFGFVTFAEDGVADRVSRRSHEICGQQVAIDSATPIDDAGPSNNYMMDNPEPYGG
YGGPMRSYGRMYGGLDFDDWGYGMGAGRPSRADFRYRPY*

>g15425.t1.3.5bbdf93b
MDRGGDEQLDFGQEEYGGSQKMQYHGGGAIPALAEDEMINEDDEFDDLYNDVNVGEGFLQ
MQQQRSETPLPPVGVGNAGFHTSRTSVPDLRTETVVTQGVNIPGSAADGKYASSSIQFPD
QKSGLTSNVGGPRGPPIADTSLKGRASEMIRSSQAGNLGYQGSMTITMSQKNGVDSLDLS
GKFAGDPGPLLNPVAGGSRVTPQLPTNHVSSSGNVNIIRPVVTENQVRPAVENGNTMLFV
GELHWWTTDAELESVLIQYGKVKEIKFFDERASGKSKGYCQVEFFDSAAAAACKEGMHGH
VFNGRACVVALATPQTIKQMAASYTNKTQVQPQPQAQGRRPMNDGAGRGNGTNYPSGDAG
RNFGRGGWTGRGGQGMPNKGPAAVPGRGRGAFGAKNMTGNAPGGGNGVGGGAYGQGLSGL
AFGGPPSGLMHPQAMMGPGFDPSYMGRGAGYGGFSGPAFPGMIPPFPAVNPMGLAGVAPH
VNPAFFGRGMAANGMGMMGTTGMDGPHAGMWTDTSMAWGGEEHSRRTRESSYGGEDNASE
YGYGEASHDKAVRSSAASREKERGSERDWSGSSERRHHDGKERDRERYDRDQRYGEEKDN
YRDYRHKESSRSRSRSRAFPEEHHRSRSRDADYEKRRRPPSE*

>g33232.t1
MAVFIACFVLFLAMTGYSDASYCLCNSGVSDQQLQKSIDYACGAGADCSQILPNGPCYSP
NTVKDHCNYAVNSYYQKKGQVTGSCNFSGTATVSQTAPNAASGCVYPSSPSNVGTPSTNS
SSSSSTGSATSTTTTSTPNLGLGPSGNGLTNNPDNGIETLHCNLLTTLAATLLLSVLICL
RF*

>g24702.t1
MSMMQIACARVVIPYVLLIYEAEEFCNLVMSGTLMDQVSRVQNHYPKHTICYLMNRLMAY
INKRDQGQYRNPGKYEGWKRPPIEEVLAKLATHFTRVHSRLCFDEAELAEHVVGLTRGLA
SCQYRKKQTPLSVNANGSVVPKDCPDRNLIKKNTW*

>g1177.t1
MIGRKNTGRASPLLLVLLALGFGFATYNLVTMLMRHKGISPGNFWVSKESSEWFDPVINM
PDEVKGTGRSNARFHVALTATDAPYSKWQCRIMYYWYKKMKDVPGSDMGGFTRVLHSGKP
DNLMDEIPTFIVDPLPEGLDRGYIVLNRPWAFVQWLEKAIIEEEYILMAEPDHVFVNPLP
NLAHGDHPAAFPFFYIKPEENKKIIRKYYPEEKGPVTNVDPIGNSPVIIKKSILEKIAPT
WMNVSLRMKDDRETDKTFGWVLEMYGYAVASALHDVRHILRKDFMIQPPWDLEVGKKFII
HYTYGCDYNMKGELTYGKIGEWRFDKRSYLRGAPPRNLPLPPPGVPESVVRLVKMVNEAT
ANIPGWDVA*

>g42998.t1.1.5bbdf941
MSEQVPKISKKQIKNQDQKKAAASPKDLPSKKQNRKAENPVRIPPTTEQCADFKCLNSWM
CKNSACRATLSIEDTFCRRCSCCLCHLFDDNKDPSLWLECASEAGQADYCGLSCHIECAL
QRGKVGVVDLGQLMQLDGSYCCAACGKVSGILGYWKKQLNIAKDARRLDVLCYRIFLSYR
LLDGTSKFKELHEIVKEAKAKLETEVGPVNGVSAKMARGIVSRLSVAGNVQTLCSLAIEK
ADEWLTTKLSAAADYREGSLPAACRFLFEEVTSTSVVIVLIELSSAYSDNVKGYKLWYCK
TREETYTKEPVSVFPRAQRRILISNLQPCTEYCFRIVSYTEGGDLGHSEAKCFTKSREII
HKNSNSVAEHHSCRNENPDSGGSSSPEMEHRTSTAIESDSGFKVRDLGKILRLAWAQEQG
CFEGFCGADNVRCCSVSKAIKPESLQEDHPSVSRELDLNVASVPDLNEELAPPIESSRDE
DNGCTLARAVEADDDAVSHDFEKNGVAGSHGSGDSQNWNHEQNGEVPAVDSKVEASRKRE
ASNGETHDSDSTLINGSPFQVRNGSSCLDENFEYCVKIIRWLECEGYIEKEFRLKLLTWF
SLRSTEQERRVVNTFIQTLLDDPSSLAGQLVDSFTDIISSKRPRNGFCSRLWH*

>g17872.t1
MCGGAILANLIPHRDNGTGLSSVDLWPTAADFWSNSPLAKPNSTSSKYPKTCHPYEAGGE
EVPKCAKRQRKNLYRGIRQRPWGKWAAEIRDPRKGVRVWLGTFNTAEEAARAYDKEARKI
RGKKAKVNFPNEDFNSNPTHTPSQSHYQHSPSPPMFYNPSTSNGFYNGNSNTSAYYPANN
NGSVACVGGGMNNNMMGFQYSSEEVSASGSSDNENFLGQLKVVVKEEKAVITENNTTISN
NVINEGAEREENQVEKMSEELMAYESYMKFYQIPYVDGQSAAEPQSINPAQEAVVGSTSI
ELWSFDE*

>g71352.t2
MFSSAMLPMVQTLPLEAANGGGGGGAGGGEFHIHHHGGPSMSLDGTNLPGDACLVLTTDP
KPRLRWTTELHERFVDAVTQLGGPDKATPKTIMRTMGVKGLTLYHLKSHLQKYRLGKQAC
KETTDNSKDASCAAESQDTDSSTCVSSRMIAQDINDGYQVTEALRVQMEVQRRLHEQLEV
QQRLQLRIETQGKYLQSILEKACKALNDQAVASAGLEAAREELSQLAIKVATDCQGMTSV
PPLSEVAAGMEKKTPSTLPARLGDCSVDSCLTSNESPVSPLGEGLQAAALKKRARPAFGN
GESLHLDSTMRQVEWMMTNIG*

>g60927.t1
MMEELLLDAKNGDTFLIPETMAIEEKKLLEKWVKEEENENPNEPHETPKMNDIQFTKLDE
LLTQTQLYTEFLLENMDDITKKGLEEDEKTTKEKKKGRGSKRKAVSDYNNSKAKRAVAAM
LTRSKEGGFLEDSNLTEEERNEKEQAELVPLLIGGKLKSYQLKGVKWLISLWQNGLNGIL
ADQMGLGKTIQTIAFLAHLKGNGLDGPYLVIAPLSTLSNWVNEINRFAPSVNAIIYHGYG
KDRDEIRRQHMPKTIGPKFPIVVTSYEVAIMDARKHLRHYQWKYMVVDEGHRLKNSQCKL
VKELKLLHVENRLLLTGTPLQNNLTELWSLLNFILPDIFSSDQEFESWFDLSGKCNNEAL
REELEEKRRAQVVAKLHAILRPFLLRRLKSDVEQMLPRKKEIILYATMTDHQKNFADHLV
NQTLENYLREKTASGRGMKGRLNNLMIQLRKNCNHPDLLESAFDGSYFFPPIDQIVEQCG
KFRLLDRLVGKLLAHQHKVLIFSQWTKILDIIDYYFSEKAFEVCRIDGSVKLEERRRQIQ
EFNDVNSTYRIFLLSTRAGGLGINLTAADTCILYDSDWNPQMDLQAMDRCHRIGQTKPVH
VYRLATAQSVEGRMLKRAFSKLKLEHVVIGKGQFKQERTKPNSTEAVEEEDLLALLRDEE
TAEEKWIQTDISEDDLERVLDRSDLVPASSEEDGKTGSDSSGLPLKGPGWEVVIPTASGG
MLSTLNS*

>g53703.t1
MAATEENKYRSYLSEAEVKNTQWRYGPPNYNAVDKLFEEGQTKIWPPGSLEEKVQRLVKT
WEMEGFHKANLEEYKTIDPKKYTVSVNGRKPLTLEEKAKLGGGYNVFLQTALPENFRIYN
PAKETAESALNIFKNTFPRGFALEILHVYSGPPVIMYKFRHWGFMEGPFKGHAPTGEMVE
FFGMAIFELDENSKVVKVQLFYDPGQLLEGLVKGKTTAEYKTETPSTCPFLLQQSSLDP*

>g71770.t1.1.5bbdf941
MKSSRRSRAGFFSSSIYGSSTFTYTFQNELSTPDSPIKAAEITVNMAASDQQAQPSTDSH
SQENSASAAAVKIQSAYRSYMVRTLVKKMSAVNSEANYWERLIQRQETVDAVRTSERERI
KINEALMRLLLRLDSVPGINPSVRELRRHLSHRIVGLQEILDAVSDTRIQNWDDFLRDWD
DVLARMEREVCEERGGGHEMERFCAEHLGFRCLQRFLRDQ*

>g53240.t1
MRRRVIIVICTFLALVAFCFSISELHHQQDQQQNKSRFCGEGEENVDCLLQMATVGGLRD
SVSPSSQQNNSEIDALAQFAVEQHNKKENALLEFVRVVEAREQVVAGTLHHLTLEIIDAG
KKKLYEAKVWVKPWLNFKELQEFKHVRDIPSFTPSDLGVKKDGHGLAWHLVPVHDPVVQD
AANHALKTIQQRSNSLFPYELHEILHAKAEVTEESAKFDMLLKVGRGKKEEKFKVVMHKN
NEGGFHLTQMEPEHS*

>g52197.t1
MTHMDENIFPNPLNFNPERFEQAPPPSYSFVAFGQGARRCPRIELARIEALAMLYYLVTG
FTWELSCKDDSFYKDPLPIFNQGLPIRIEQK*

>g21746.t1.5.5bbdf93b
MVITRGLGRSSGWSLCRLQFSWERVKMQICAQSSVDLFKKKFRYFTCSNQGES*

>g59957.t1
MAYLFFSLLLFIFQSLFIPLVYSNDNAPTCRSYCGNLTIDYPFAVQSGCGHPGFRELLFC
INDVLMFHISSGSYRVLDIDYAYQSLTLHDPHMSTCDSIVLGGRGNGFVVEQWRSPYMNP
TVDNVFMLLECSPESPLFEGFPGKHLPCRNVSGMGCDEYYGCPAWDIIVPKRVGSVYGSG
PPECCAVSYEAIKDVNLTKLGCQGYSSAYSLAPLRVSGPDEWSYGIRVKYSVQGNEPFCK
ACEATGGTCGFDTDGNTDLCMCGSWNSTSNCDSVHSASNQITGSLVEALTGFLICLFVWR
NILRL*

>g6418.t1.1.5bbdf93d
MASYENYPSAYALKALHRTGQVANNSTEVWVHIDTLSAMNGISRFCENDYPWRYSKEEGI
ALDQLHKRNFTYIVNEHSNITGFQCLFSINGFSRVKLRIGFPPIIVVSC*

>g46693.t1
MAYTVLTKIFSKLVWTGRIGSDLVLVASSYSFSRRNYRQGYLTPSSYPTNLNNNSKIKGW
AIKIRATNLCTTTISDLASTARAASHACAGGHNTKNVTSGDTVTDGVADVGGRGYLTMSD
EQLMSQCEMDTFKASGPGGQHRNKRESAVRLKHLPTGIVAQAVEDRSQHRNRASALSRLR
ALLAVKVRNPVVLDTYVPPQELLQILPAKSTIKGSNCGPQIGPNNPKFVLGLQALLDLIF
AVNGSVSDAARILGLSTGALSRLILSDDLLRMAVNEFRTSKVTNTLNLRITDLM*

>g21872.t1.1.5bbdf936
MNSLATSFASQISPTCSTKVPVRRLCFSPSTTRLAFWKLSTNHMTIPLPGRIVCMAEPYL
IAKLESAEKTWQELSVKLADPDVVSNPSEYQKLAQSIAELDEVVVVYRRFKTCGKQLEET
KALAKEEGADEDMAEMIASEIETLTNEINDLEERLKVLLLPSDPLDSRNIMLEVRAGTGG
DEAGIWAGDLVRMYQKYSERNSWKFSPISSSEAEKGGFKTYVMEIKGNRVYSKLKYESGV
HRVQRVPQTEAQGRVHTSTSTVAIMPEADEVEVEIDLKDIELTTARSGGAGGQNVNKVET
AVDLFHKPTGIRIFCTEERTQLQNKHRALQLLRAKLYEIKLREQQESIRNQRKSQVGTGA
RAEKIRTYNYKKQLGLCDEDCLLLLHLGQSGY*

>g45926.t1.1.5bbdf93c
MAVAELTITPSSYTKTSHHHNHHLYSSRLSYVSTRLSNQRRINFRPFPRTHNAKICCSVK
EVQAPVALKTEDPKKKPDCYGVFCLTYDLKAEEETRSWKKLINIAVSGAAGMISNHLLFK
LASGEVFGPDQPIALKLLGSERSLQALEGVAMELEDSLYPLLREVSIGIDPYEVFQDVEW
ALLIGAKPRGPGMERADLLDINGQIFAEQGKALNAVASHTVKVIVVGNPCNTNALICLKN
APDIPAKNFHALTRLDENRAKCQLALKAGVFYDKVSNVTIWGNHSTTQVPDFLNARINDL
PVKEVIKDSKWLEEEFTEKVQKRGGVLIQKWGRSSAASTAVSVVDAIKSLITPTPEGDWF
SSGVIP*

>g7151.t1
MAKTESKWEETALLVIDMQNDFILPGGPMQVKGGQAIVPNVIKAVEVARGRGIPIIWVVR
EHDPLGRDVELFRRHLYSPGQPKPTSNGSIGAELVDGLVIKEGDYKLVKTRFSAFFNTHL
HSYLQGAGISTLVIIGVQTPNCIRQTVFDAVALDYQSVTVIIDATAAATPEIHDANIIDM
KNIGVTTPTLEEWAESNI*

>g66252.t1
MDSSKITALLLLSLLVVASAKSVDLDCGSCSKPHKPHKPKTPKGPITLPPVVLPPIVKPP
VALPPITLPPIVKPPPPKGKPCPPPPAKSDKCPIDTLKLGACVDLLGGLVHIGLGDPVVN
ECCPVLSGLLDLEAAVCLCTTLKLKVLNLKIFVPIALELLVTCGKTPPPGYTCSL*

>g71713.t1
MSGGVPQSFNLYALYAFLLLLCFLASSCSSLNYIKSSVITAQRKDALLPEISPSEAPQPL
LPLLAPSPLSPFTNSTIPKLSGLCALNFAAVGSMMSMTSIDCVGGFAPYLANVMCCPQLD
ATLTVLIGQSSKDTSMLALNGTLAEPCLSDFQQILVSQGANDTLPRLCSIHPSNLTEGSC
PVKDVNEFETTVDSSSLLAACGKIDNVNECCEQVCQNAIAEAAGKLAAKAYDLMSMGGFH
ALADHSTRVSDCKSIVLRWLASKLDPSQAKKVLRGLSNCKINKVCPLVFPNMNHVIKSCG
SEMHDQIVCCKAVESYVSHLQNQSFVTNLQALNCAASLGRKLRRANITKNIYNLCHVSLK
DFSVQGVESGCLLPSLPSDAVFDKSAGLSFLCDLNDNIPAPWPSPSQLPASSCNKTVKIP
ALPAAASGQSSVCSTDLASLVIFAVSAVLAILR*

>g34017.t1
MDERGVKQPLLPGSLGVIQKTDQKNGYRRRYRKCKSAPLAEFVPRELNGKDGLPTESESI
LNKLHPSIRRVAIYLFLYLAVGSICFYFVRHQIKGEKTDGVLDSVYFCIVTMTTLGYGDL
VPHSVATKLLACVFVFSGMALVGLMLSKGADYLVEKQEVLLVKALHLHRKVGPTEMLKEI
ETHKAWYKCLMVFIFLLVLIVVGTIFLATVEKLDIVDAFYCVCSTVTTLGYGDRSFSTKA
GRIFAVFWILMSSLCLAQFFLYVSELNTENRQKELVRWVLTRRMTNVDLEVADIDDNGIV
GAAEFVVYKLKEMGKISQEDIALLLEEFENLDVDQSGTLSVSDLWLAQSSSTAR*

>g2897.t1
MVNVFTAVKPIVQGVMKLAGVTPQKVEIEPGTVMNFWVPTETINNKDQRLINKPPAMLLH
GFFTDGILTWLFQVLALTRNYAVYVPDLLFFGESITDKPERSASFQAECLAKGLMKLGVE
SCTVVGFSYGGIIAFKLAKLYPDLVESMVVSGAVPELTQSMSDAVLEKHGFSRWSDFLMP
ETVEGLKRLLSIGSNASLFTRFPRFVYRHFLEVMFNHRKERAELLEAMIVPDHEFTPTTY
SQRIYLLWGEEDKILNLEVAHNIKLQLKGSVSLHCIDNGGHISHLERPGIYNNHLKRILG
SPHV*

>g63465.t1
MAAPVESVQCFGRKKTAVAVTHCKRGRGLIKINGVPVELVQPEILRYKAFEPILLLGRHR
FAGVDMRIRVKGGGHTSQIYAIRQSIAKALVAYYQKYVDEQSKKEIKDILIRYDRTLLVA
DPRRCEPKKFGGRGARARFQKSYR*

>g7161.t1
MPRTRFSGSLISSPKVDLIVDLGNPFLNLTVDGFLKIGTVAAAKVAAEETYYIVKRGSIS
HHKFEQSLKKMCKEGAYWGTVAGLYVGMEYGVERIRGVSDWKNAMIGGALTGALISAASD
RNKDKIVMDAITGSAVATAAEFINHFT*

>g73531.t1
MARETSFRLNAKNVFITYSRCDVPKEVCIQKLLRKFPDPDVITYIRVSSEIHDDGIPHIH
ALLQFQKRFHTRNGKFFDMEHDQRSTIYHPNVQAAKDAMAVREYISKYGNFCEWGTFKTG
KVYKTQFDCYEEALKQSNLDDFIRVIKEGDPKAYCLYYERIKSHAEKLYAPPPQQYTSPF
PLANNNKPELIEWAEVNIRPSETRPVRPKSIIVEGPSRIGKTIWARSLGPHNYLCGHLDL
NKKLYSNDAWYNVIDDVNP*

>g54745.t1
MVIRVLNSSRKNQSKAMQIAAAVKGVETVSLQGENREQLMVIGEGVDAVNLTSLLRRKLG
FAELISVIPIGDLEAFEEETACGTMMQPTAYPTYQLSTYPTYQASLPPYVQDVGIRNQDS
CVIL*

>g62696.t1.2.5bbdf93a
MEFKLFSVMSVSMSKMLGTEIMFSSSFINSASMIGCKEATIQSFSYRGTYPKASYSSIPQ
NTIKPVVGEEILYQSYPYRVHDTNGSSTYRKDAGVLDAYDDEYSGVIVHPEGLPSNPTAF
ASILRSSLSHWKAKGKKGIWLKLPITKSEFVPIAVKEGFQYHHAERQYVMMTYWIPEEPC
LLPSNASHQVGVGSFVINERDELLVVQEKYCATGLVGLWKIPTGFILESEEIFTGAVREV
KEETGIDSEFLEVIAFR*

>g75733.t1
MQRFTAKIVDMMKKESLFASQGGPIIFSQIENEYGNGDIEPRYGARAKPYVDWAAGMATS
LDTGVPWNMCQQNDAPDPIINTCNGFYCDQFTPNSDKKPKMWTENWTGWFLAFGGAAPTR
PVEDIAFAVARFFQRGGTFQNYYMYHGGTNFGRTSGGPFISTSYDYDAPLDEYGLVRQPK
WGHLKDLHKAIKLCEEAMVATDPTITSLGPNLEASVYKTGSGQCSAFLANVGTQSDATVN
FNGNSYNLPAWSVSILPDCKNVVLNTAKINSMTTLSRFVSRSSTDVTSDASLSGWSWVNE
PVGISSQNAFMKLGLVEQINTTADKSDYLWYSASIDIKGNEPFIQNGSQAVLHVQSLGHA
LYAFINKKLAGSAKGGSGNAKVSLEVPISLIIGKNAIDLLSLTVGLQNYGAFFDLTGAGI
TGPVQLKSSTSGSTIDLSSQQWTYQIGFKGDEVGLSSGGSSLWVSQSTLPKKQPLIWYKT
NFDAAAGNDPLALDFSGMGKGEAWVNGQSIGRYWPTYTAPNGGCAGSCNYRGSFNSNKCL
KDCGKPSQLLYHVPRDWLKPSGNVLVLFEEMGGDPTQISFATRQTGSVCSQVSESHPIPV
EMWTSDQEAGKRAGPTMSLECPSHNQVISSIRFASFGTPGGTCGSFIHGRCSSRKALSVV
QKACIGSRRCSIGVSSAIFGDPCVGTIKTLVVEASCTG*

>g3500.t1
MALESLERLCGKLSFLRRESGNTDMERRRHIGPLQIGPQHAVRCVVLSNMYSAAGKWEHA
AAARKLVKSKNFSTEPGNSRREMHGKLHRFISDD*

>g76217.t1
MEVETTMTSVEGRELRAPELKLRVQTAMKFGTPMEDPLICHVSGIHEFSSAARIEGLLRK
CCLFASFNKTQDQFLENLLSQKINAKLGDSNVELNERLPHFVDEDYVIFLGADVNHLAPG
NSTCPSIAAVVGTINWPAARIQPQEHGKEKIVNFGIICRDLVDCYAQRNKVRPRKIIVFQ
DGASDEQFAMVLNEELLDLKEAICDDHYQPTVTLVVAQKRHQLFLDGRGDGRPLRKPWDK
QTYTLMFFGMRMHSYPTSCSNSYTIRWTKPVSLVPLVHYADHAAYGGRLFQQVVMEQSPA
SSVPSSSAISSASLSSSAASFDLKSYTWHPDL*

>g12618.t1
MQDQIIIPACFSSGEKQMDDSAGVTRSGQSVFMSTYRTKIADQCRLITITWCKNLLLHGL
SVSVEGPEGESQYTCKVELKPWYFWRKQGSKRFVVEGKPVDIFWDLKAAKFNGETEPSSE
YYVAVVYDEEVVLLIGDLKKDAYRKTGCRPALIDPILVSRKEHIFGKKKFITRVKFHEKG
RLHEITIECKNISGNNSNGNTPTGVDPEMEIRIDGHLVIHVKHLQWKFRGNESINVNKMR
VEVYWDVHGWLFCPGLRHALFIFKPTLLSSSPSLVPPSASPSLSSSLTSTPMSSQTGSSC
SLEGFNGSSSSEFCLFLYAWKVE*

>g61701.t1
MIWTFNSCFLEFLNSRRQYLSSAVLQAKSATEADGTSGSARGSLDSGLLDLLEGKLAVIQ
FQIKIKEELEAMASRLEASSSTIDSVSNDTQQEQRSSPDANLIRVILEKAKELSLDLKSI
TQLYNDYAVPFELWEVCLEMLYFASYSGDADSSIVRETWARLIDQALSRGGIAEACAVLK
RVGSRVYPGDGAVLPLDTLCLHLEKAALERVVSGVESVGDEDIARALLAACKGAIEPILN
TYDQLLSNGAILPSPNLRLRLLRSVLVVLREWATSVFAQRMSTSTTGASLILGGTFSFGQ
TTAINQGVRDKITSTANRYLTEVRRLPLPQSQTEAVSRGFRELEESLQSHFSFERF*

>g31676.t1
MDIKKLHVAILSSPGVGHLIPALVLGNRLATHHDVKVTILVITTTTSPVESQILKHHAGP
ELVDILQIPPVDISHLIDASTKIVTQLCIMVREALPGVRSTIAGMKHRPNVLIGDMFCTE
AFPIAAEFNLPKYVFVTTTAWVTALTTYCPVLHEQIDGQYVDQIEPLNIPGCKPVRPEDV
IDPMLDRNDQQYKEYLRMGTELRLGDGILMNTWEELEPISLEALRRNVSLRALMKLPVYP
IGPLRRPNELAASKSEQIKWLDKQPSESVIFVCFGSGGTLSAQQITELAWGLELSQQRFY
WVVKPPAKKGADESFFTTGSGLDGTLEYLPEGFLSRTKETGLVVPLWAKQSEILKHPSVG
GFLSHCGWNSTLESMTSGVPMIAWPLYAEQRLNATMLAEDLGVAVRPEVLPTKKVVDREE
IEKMVRTIMEYEQGKVMRDQVKKLKTTAENALSKGGSSYNAMCDVLKDAVLRLNL*

>g849.t1
MATLIIEDRSCQHLSSVTDLPDELVWEILTRLPVKSLMRFKCVSNYWQSIILNPSFASEY
RGGFRGVLIDEASFWMFSPTRDFFYLNLFDDNDETVDDDNGLNSWTDDEIFDDDDGFNCI
SNSIKYLSHSHTVDYRSGRELRTTNIVNGLVCFYTGNYSCLYNIATRETMELPLSQNDNK
CCSYHPGFDPVNKLYKLLKICPIYEEEDEYFNEQLKAILIRNLDSEILILGIDKL*

>g51227.t1
MAFLISKTKPSFPEPQNLNLSNNARNESETINSVTSQLTLKSSAAAARHGTQPLDKDVVL
RRIRHHKSMIKVRNAFQVLLGADDHDGDTHTLADNEQKWLQLGDAFSSP*

>g75441.t1
MAMSLPHQIGALAGTPITADAGGVPGEGAQSAAPVNASAVWRTPATNLRVSVQKPGDIER
ISPLSSPPLSPMKAGMRPDLSVACQAFSTAESELGVENTYILPKEAEKEIGVPVFVMMPL
DSVKMDNTVNRRKAMNASLQALKSAGVEGIMMDVWWGLVERDEPGKYNFDGYVELLEMAK
KHGLKVQAVMSFHQCGGNVGDSCTIPLPKWVVEEINKDPDLAYTDQWGRRNYEYISLGCD
TLPVLKGRTPVQCYCDFMQAFRDKFENLLGETIVEIQVGMGPAGELRYPSYPEQNGTWRF
PGIGAFQCYDKYMISSLKAAAEAYGKPEWGGTGPTDAGHYNNWPEDTNFFRKEGGGWNSQ
YGEFFLTWYSKMLLDHGERILQSAKAIFENRGVKISVKVAGIHWHYGTRSHAPELTAGYY
NTRFHDGYLPIAQMLARHSAIFNFTCIEMRDHEQPQDALCAPEKLVRQVALATQEAQVPL
AGENALPRYDEYAHEQILKASSLNDREMCAFTYLRMNPDLFQPDNWRRFVAFVKKMKEGK
DVHRCREQVVREAEHFVHLTQPLVQEAAVALRH*

>g20789.t1_g20788.t1.1.5bbe19fe
MVKMENDVLHCSGGFLADDQGLGKTISTIALILKERSPPSIESSRKESEAETLNLDDDDD
DDEIGSNVGKSNQGAESCQVNGSFGGRKAATVQAKHRPAAGTLIVCPTSVLRQWSEEIQN
KVSSKAKLSVLVYHGSNRTKDSHELAKYDVVLTTYSIVSMEVPKQPLVDEEDDETKSPRE
LSFCKKRKYPPSSTKKSSKRKEVLNGELLNVCPLAGVNWFRVVLDEAQCIKNHRTQMARA
CWGLRAKRRWCLSGTPIQNAIDDLYSYFRFLKYDPYWVYKEFCSGLKAPIHDNPENGYKK
LQAVLRTIMLRRTKGTLLDGEPIISLPPKTIKLCKVDFTQEERDFYCRLEADSRAQFAEY
AAAGTVKQNYVNILLMLLRLRQACDHPLLVNGFTSGLKSISSIETVKKLPREKQIHLLNC
FEASRAICGICSDPPEDAVITSCGHVFCNQCICEHLSNDDTHCPTPNCKAHLNKSAVFSV
ATLRCSPSDQTTLESNSDCSLDRAYDSSKIKAAIEVLQSLTKRQNYSIMNSSSSVEDATS
SVENASNLPSGGLHGKWCNEEEIKGMDEPSGGSVTVMGEKAIVFSQWTRMLDLLEGCLKD
SSIQYRRLDGTMSVVARDKAVKDFNTLPELQVLD*

>g7241.t1
MGRQPCCDKVGLKRGPWTIEEDNKLMNFILNNGIQCWRLVPKLAGLMRCGKSCRLRWINY
LRPDLKRGAWTEAEEDMIIELHSRLGNRWSKIAAHFPGRTDNEIKNHWNTKIKKKLKFLG
LDPLTHKPIDQHENCASKSEEFPECSSSRELEVMKLELQEKLQSEAFQMQHNDTNIKTSL
HEQRSTETSNSSLDEEKNNVAGISDETKEVPELGSIVVQNVEPVDASNVVEMNGIQLEDP
FHNWINSPLPWDIFSSLGDNFL*

>g51432.t1
MGSLVQEEMEKNQGKPLGILLIEKIKRSSVSFKTYQAIVLIVTFFAYASYHVTRKTTSIV
KSALDPESPTKRSEPMLGTGWAPFDGSDGTSLLGELDVAFLFVYAIGMYFSGHVGDRMDL
RRFLTAGMVGTGLFTALFGVGYWANVHIFYYYLIVQMMAGLFQSTGWPSVVAVVGNWFGK
KKRGLIMGIWNAHTSVGNITGSLVASALLKYGWAWSTVVPSLMIAFIGLVVFLFLPVSPV
SVGANNDEEDEMHFPKKGGEEVTEPLLISEKEEEEDSAVGFIEAWKIPGVAPFALCLFFA
KLVAYTFLYWLPFYISHTAIDGRYLSNEESGNLSTLFDVGGVVGGILAGHISDQLNARAI
TAASFMYCAIPALFFYRSYGHISMKMNIILMLITGMFVNGPYALITTAVSADLGTHSSLK
GNSRALATVTAIIDGTGSIGAAIGPLLTGYISAKSWNAVFTMLMGAALIAGLLLTRLVVS
EVATKIQESRSQPRAPTVEV*

>g9702.t1.1.5bbdf940
MDLQNSAIYGGRAIVDKVVEIKTSSPCSQDTFGKVNPWSSEDRKEEDFIGAEKGGNTFAP
QGSVCFGQPIVGLNLGMPKNSEKLSTTSNSRTSVSLPSTSSNTAKRSRVSFQSMQTSRCQ
VEGCNLDLTSAKDYHRRHRICESHSKSPKVIVAGVERRFCQQCSRFHNLSEFDDKKRSCR
RRLSDHNARRRRPQPEALHLSTAGLPSSLYDRRPPNFLLNRMPSSSSNTTWESSGSLKMT
QAGNSLIKTLDIDASAANSHLSEAQALPRALSLLSTNTWGLNEPESTSLDHLMQGAVSIA
QPTMQLEAQNWPLISAHHVSAEQAPPMPPLNPMALQSTDSSHIQDFLSFKPPYGSGFHFS
SRIN*

>g23906.t1
MLSTKRIKVFSDLHKSSSQSADITDSADVLQEILVKLPIKVLLGFKCVSKQWLSIISDPQ
FGYLHFCSNPCTIAGLLLYQIPRPHFPRYDFIFLNGETNINPFRSLTFVDGNSDIHRIWS
CKGLLCLCIVRSPFYKVVCIWTVGMVYRFSVYSSETKIWRDADTSLEVGNNDYYLFKRGV
FWNNSIHWVSKLGPFLRFDVDKECIEKMPATDLPTARKQRRIRYFGESHGHLYLIEIPER
GIRFFNILEMKRDYSEWFVKYRVDFEKLSRILPKNVLYRGKFYILYIFQLENEEDIFSLV
LSSAVSTYLCLVSDNSCYSEKVRHLHYDVKDKIHYKWYNCHQHFMTLTSV*

>g66472.t1
MARAGGITNAVNVGIAVQADWENREFISHISLNVRRLFDFLVQFEATTKSKLATLNEKLD
TLERRLELLEVQVGSATANPALFTTN*

>g39518.t1
MSNRKTQVNHEYFKQMKEGFRKEKLSSNKYEEHSERKDKEVSVKGGELSVAQGKEFGNIG
KGVKLSSIGSMENNLIKIVDANDRMRERSEKSEPRDMEVSILVSPGTLISATIRQEGSKS
GELDIQEPVKEQPKTEETKKNKVINMEIEQKIKDKEVENNKENKSQRKLGTYKRLKGRDR
SPLKDKSNIGDKLQIGEKRKLTTDKEEDVLMQGENQSNKRRMGYRKLSQSSSSPRPLSME
VLESGNILALEQATTTCGLGFDNDGDSDLVSLKVSILGDCQIGKTSFVIKYIGDEQEKRS
LQMQGLNLMDKTLFVRGARIAFRIWDVGGDRKSLDQVPIACKDAVAILFMFDLTNRCTLN
NVIEWYTEARKWNQSAIPILIGTKFDDFVQLPPDIQWTVISQARAYARAMRATLFFSSAT
HNINVNKIFKFIMAKLFNLPWTVERNLTIGEPIIDF*

>g12935.t1
MVIPSRCMPWLASVILLLLLLTPLSSSSSLKTESATKRKERITAKHGVVATDDGRCSKVG
RDVLREGGHAVDAAVAAALCLGVVSPASSGIGGGAFMIVRSSDGNAQAIDMRETAPQKAY
QNMYLGNETIKAAGALSVAVPGELLGLHEAWKQYGKLPWSRLVRPAAHFSLNGFRISPYL
HMQMVATESAIMADKGLRDIFTSNGKLLQPGHKCYNRKLGKTLIEIAKNELTSFYNGTTA
YNLVKDVQKAGGILSMDDLKHYQVKIREPISTNILGLDILGMPPPSSGGAAIVLILNILA
QYGASLNSSTPLMTHRTIEALKHAFAVRMNLGDPDFANIKAVINDMLSTQFAQELQKTIY
DNMTFSPPHYGGRWNQIHDHGTSHVSIVDNDRNAVSMTNTINSYFGAKFLSPSTGIVLNN
EMDDFSIPANTSANDPPPAPANFVYPGKRPLSSMSPTIVLQGGKLKAVVGASGGSKIIAG
TTEVFLNHFVNGMDPLASVMAPRFYHELIPNVVRYEDWKVVTGDHFEVPEETRSFLKDRG
HVLQSIAGGTICQFVVQDLKSSELVAVSDPRKGGFPAGF*

>g914.t1
MAGSKHKNNVLLILPFLLLLFGSLLSSTSFAEIIFEERFEDGWQSRWVKSDWKKSEGKAG
SFKHTAGKWPGDPDDKGIQTSTDARHFAISAKIPEFSNKNRTLVLQYSIRFEQEIECGGG
YIKLLSGFVNQKKFGGDTPYSVMFGPDLCGTQTKKLHVIYSYQGQNYPIKKDLQCETDKL
THFYTFILRPDATYSILIDGRERDSGSLYSDWDILPPRKIKAVNAKKPADWDDREYIEDP
NEVKPEGYDSIPREIPDPNAKKPAYWDEEEDGVWKPPKIPNPAYKGPWKRKKIKNPNYKG
KWKIPWIDNPEFEDDPDLYVLKPIKYVGIEVWQVKAGSVYDNILICDDPEYAKQVVQEVL
ANREAEKEAFEEAEKIRKAKEEEEAQRAREEGERRRRERDHDRRRDRYRDRYRRHDRHDY
MDDYHDEL*

>g4050.t1
MDVKSYRVGLSKIYRILIRLGNSVGSGTSSSECALLEENVKGLLNRWGKDKHSFVGLGIG
VQTGLVLGQGLVAIMFDTIESSHMDIIIYQSLRAPQTVMRIV*

>g25765.t1
MQTNSVVFNAKPVLFSSIPIIKSNHTTDIPSSSSNNSSSSLLFSAHKFNWAHQKKAAITL
RPDKRRCSRTHLISPKNAWKRFSCAPTSVLDGTKRVSCFRYPCWKSGGGHRFRTGAYFDK
SSFYVLKHSVDVSLANEVKQLYVPRATVGPEEPHAASTTWPDGVIEKQGLDLYDPELERS
EFERFLSSELPSHPKLHRGQLRNGLRYLILPNKVPPNRFEAHMEVHVGSIDEEEDEQGIS
HMIEHVAFLGSKKREKLLGTGARSNAYTDFHHTVFHIHSPTSAKDSDEELLPVVLDALNE
IAFHPKFLASRVEKERRAILSELQMMNTIEYRVDCQLLQHLHSENKLSKRFPIGLEEQIK
KWDADKIRKYHERWYFPANATLYIVGDIDNISKTVYHIENVFSQTGVESETAAPPTPSAF
SAMAGFLVPKLTVGLTGSLAQDKSSGSVEQSKIFKRERHAVRPPVQHNWSLPGSSGAMKP
PQIFQHELLQNFSINMFCKIPVNKVQSFGDLRIVLMKRIFLSALHFRINTRYKSSNPPFT
SVELDHSDSGREGCTVTTLTVTAEPKNWQSAIKVAVQEVRRLKEFGVTKGELARYLDALL
KDSEQLAAMIDNVSSVDNLDFIMESDALGHKVMDQRQGHESLVAVAGTVTLEEVNAVGAS
VLEFISDFGKPSAPLPAAIVACVPMKVHLDGLGETDFKITPTEISDAIEAGLKEPIEAEP
ELEVPKELITARQLLELKSLCMPSFHPIGPDVNETKVYDEETGITQRRLSNGIPVNYKIS
KSEAKCGVMRLIVGGGRAAEDLETKGAVIVGVRTLSEGGRVGSFSREQVELFCVNHLINC
SLESTEEFICMEFRFTLRDNGMCAAFQLLHMVLEHSVWLDDAFDRARQLYLSYFRSIPKS
LERSTAHKLMLAMLNGDERFVEPTPHSLQNLTLECVKDAVMSQFVCDNMEVSIVGDFSEE
EIESCILDYLGTVKATRGLERAQKYRPITFRTPTADLQHQQVFLKDTDERACAYIAGPAP
NRWGFTFEGQDLFEAIGNMSTNEGLDEQLESEDQLTVSQRSEKELQQGFCSHPLFFAITM
GLLAEVINSRLFTTVRDSLGLTYDVSFELNLFDRLKLGWYVISVTSTPGKVHKAVDACKN
VLRGLHTSRVTPRELDRAKRTLLMRHEAEIKSNAYWLGLLAHLQTNSVPRKDITCIKDLT
SLYEAANIGDIYLAYEQLKIDENSLYSCIGVAGAQAGEEISDLLQEEDAAEGLQSVIPLG
RGSSTMTRPTT*

>g63263.t1.2.5bbdf93d
MDEFSGKRHKGGIVIPRKGSSLVSRDTIGNRDQNAQFCNRIGCNGRLKYVKSNQSDPAEK
PKNSRHTFCSSNGKKIVGSSSRACFSNTNRRKSSQGSPSKSSSSHLETDSSESCGVPDES
DVAELIPSISRNQTGLQPEIRGSSADKFMPPVGSSSLGSSNKSHRALLNKPRSGLKNAVP
GASVSAVTSSSTSIVSGARNYNGSRNGLRNLNSISSVIPRGNTPSESNVRRDVLRKRSPE
GESSSSSKGKTGNVAHFEDGHVSGSRHGGNHVSNNDCGAKSVRTRRARNSNTGIRLSNHD
NINALSISESTSSIPHLSRDETPNNANSYSLSYQSSMEGSSNASSSCSLSGSSGDSVTGI
MTFTSTEHGVTHALRRQNLNGVAEVLLALERIEQDEELSYEELLTLENNLFLGHLSFYDQ
HREMRLDIDNMSYEELLALEERMGTVSTALPEEAFAKCIRKIIYQTTSLDVGATGCSEDE
VDTKCSICQVASLLLKIFSRYYAFGWM*

>g29445.t1.2.5bbdf934
MNAAMASIKLSISISPLQQNSRLQLLNNFSNFLTAEIRNSTNSTKTKRPNSFYCSNSNTV
TEILPSETEEAGSDDNEDDGQMSPPTMIGSAPPVRRRRRRYRKLCPGENKGITEEMRFVA
MKLRNSGKPRKSKKGISNSADSGEDGNDGSILEEQEDKDNDGSDGIEETWRPSMEGFLKY
LVDSKLVFSTIERIVDESSDVSYAYFRKTGLERSECLAKDLEWFSQQGNVIPAPSNPGVS
YVQYLEELAETSPPLFLSHFYNIYFSHIAGGQVIAKKVR*

>g42205.t1.12.5bbdf93d
MADAVVEFLLANLKELLLYHVDLLSGVKDQVESLHRELSLMKAFLKDSREKRNESEYIRE
LIRQIIDVTYEAEDIIDTFVVNASMQKARNVVRRAFHALDHTQMLRNVSEEIKSIKERVK
EIYDKKMFAIEYLQSGEPPHKVSPKKRAPVVEEENVVGFDEEARTVVERLTNGPKQLEVI
SVVGMGGLGKTTLAKKVYTDPSVEYHFYIRAWVYMSQQYSRREVFLGILDSMGFITDQAN
KMSDDRLAEELHRHLRSNRYLIVIDDVWTKEAWNDIKMAFPNTDSGSRIMLTSRDTDVAK
HANPYNAPHHLRFLNDAESWVLLCKKVFRQGSCPSELEEVGQHIAKKCYGLPLAIVVVSG
LLLKREKTHAWWNKIAESVSEYVARDPKQCMDVLALSYKHLPDHLKVCFLYFGAFPEDFE
IPVSKLLKLWVAEGFIQQVGQECLEDTAEEYLVDLVDRNLVIMAKKRANGQIKSCRIHDM
LRDLCVREGGEEKFLRVIKGSTDSASLDTIKNHYRRLCVHSHVLEFISSRPSGPHVRSFL
CFSVDERDVPREHTSVILEPFKLVRILDLKPIAFSRFPSHEILQLVHLRFLALSGQFKVL
PSSISNLWNLQTLVVRTTCRELDIQVDIWKMLQFRHLHTSGLSYLRGPCARTRNDSGDPF
VRRNIQTICTIVPESCTENILARTPNLKKLGIRGKLVTLVEERGGISLFDNLAKLDHLET
LKLLNDTFPDHPSQCNILGLPQSYKFPPNLKKITLSDTLLDWTHMSTLGMLPNLEVLKLK
DHAFKGSLWEPLDGGFRLLRVLQLGRSDLVHWRASGHHFPRLERVVLKHCTSLEEIPCGF
GEVSALQNMELYWPTQAAADSVRIIQKQKQHGQSMSNNPFKLLIYPPDI*

>g18766.t1.1.5bbdf934.2.5bbe19fa
MRRQAPSYCQSCLAFILKFLNYLQTIMGVSIIIYSCFMLNRWNDHKSSVPSSPPPHSHPS
ASPSYFSENLAADVVLSEAGHLHVDGHQFIFHSLPAPWFIYGFMGVGILLCCITFIGHAA
AEAVNGCCLCFYAVLTTLFVLLEVGLVMFIAIDRQWEEVISTVIEVFAISSFNLFVTYYI
GFSGSSN*

>g73797.t1.1.5bbdf940
MSAVGAAATASLYSPLASSSSSSSALQDNKLKFAAQSVKPAFIFKPTSRSFSLIRASTGS
STELDAVTTYSEIVPDTVIFDDFERFPPTAATVSSSLILGICSLPDTKFRSAVDTALADS
VCYGLENLDLRISCFFNKALVNVGSDLAKFVPGRVSTEVDACLAHDTHGIVHKVHELLKL
YDDVQVPPERLLFKIPSTWQGIEASRVLESEGIQTHLTFVYSSCLISFAGSNRLKKILLA
CFCQAAAAAQAGASVIQIFVGRLRDWTRNHSGDPEVEAALRRGEDPGLALVTKAYNYIHK
NGYKSKLMAAAIRNKQDVFNLLGVDYVISPLKILQSLKDSVTPPDEKYSLMRRLSPQSAA
AYNFSQEELVKWDQYSFASAMGPAAVELLAAGIEGYVIQAKRVEELFGKIWPPPNV*

>g2362.t1
MASSDSVILFIFCTGFGAGQSCEDLGGLGCFWWTEIQVVVGCFWLFVDGMRVVVYGSCSG
GGLRGYIPEEEEAVV*

>g64569.t1
MAMPAARLLLPTPTTTTIGSRRNFFSPSAVNHNTLFRIYSSSSFSASLQPNSLKFVVNDN
FRNFSICSAVSSSSSMSIQAPSETTSPASFLDHKESGFLHFVKYHGLGNDFILVDNRDSH
EPKITPEQAVKLCDRNFGIGADGVIFAMPGINGTDYTMRIFNSDGSEPEMCGNGIRCFAR
FIAELENLQGKKSFTIHTGAGLIVPEIQEDGQVRVDMGEPILKASDVPTKLLPNNGQSVV
KSKLEIDGISWNVTCVSMGNPHCVTFGTEVSENLQVDELNLAEIGPKFEHHVMFPARTNT
EFVQVFSPTHLKMRVWERGAGATLACGTGACAVVVAAVLEGHAGRSCTVDLPGGPLQIEW
REENNHIYMTGPAEVVFYGSVPL*

>g23219.t1
MKPTIFNKNVAKALHTWHQTARKHIKQKRHSNSVEPFSSQPSTPLQGTSPVHLVRYYKSE
VDSVEISSRISNHNMEPCEAEGSLQLSQHQDDLSVSHQGRKYDVIEERGTSVQVKNQEVL
VPQTHLFQHEVDIPSADFSFEKNSRM*

>g55114.t1
MALEWIVLGSAAAAEALMVLLLTIPGADHLRAGLTSITRSLLKPFLTMVPFSFFLLLDIY
WKYETRPSCKSAESCTPAELMRHQKSIIKSQRDALLIASALMFYWLLFAVTRLVVQVEVL
NQRIEKLRNQE*

>g50021.t1
MHFKSISTSKISSLKSCIRFRASISSLKVAWRKDPKLDQAIENDKQWRLCARVVKEVLNE
SGQVIPLRYLEKRRERLRLPIKIQTFLSRNPGLFDSYMDRIRPKSDPVEFLRASNMLRQF
LEEEKRIYLENEPLIVSKLCKLLMMSKDRVVSADKLVEVKKEFGFPNDFLVNLVPKYPQY
IRLVGAPGEGKSYLELVSWNSEHAKSVIELRAEEESRLTGIKIRPSFNWKLPPGFFIKKE
MREWVRDWLEIPYISPYDDVSHLEPASREMEKRNVGVFHELLSLSIYKRIPVPILGKFCE
DYRFSNAFASVFTRHSGIFYMSLKGGIQTAILREAYKGEELIDRDPLIEIKDKFVELLAE
GHRQRTEQLNLERKMIEKDMELMAARATELN*

>g41069.t1
MAAQLGREWTGIQQFPAATQTKLHELLGKLKQQDVSTLTILVMGKGGVGKSSIVNSIIGE
RVVPVSAFQSETPRPMMVSRTRLGFTLNLIDTPGLVEGGYVNDQALQIIKNFLLNKTIDV
LLYVDRLDAYRVDNLDRQVVKAITDGFGKKIWRRGLIVLTHAQLSPPDGLSYDDFFSRRS
EALLKVVRLGAKIKKQDIQNSPIPVALVENSGRCNKNESDEKILPNGTVWIPSLVKTITD
VVLSGGEGILVDKKLIEGPNPNDRGKIMIPFILAFQYFFVIKRIQKWIREDIASESGPSW
A*

>g49472.t1
MEERRNSFDGLHGKMNNLGVAKEEGEDQPKTSGSSSSNSLVEDSTGKKLTSSTTGVRQYV
RSKMPRLRWTPELHLCFVQAVEKLGGQERATPKLVLQLMNVKGLSIAHVKSHLQMYRSKK
IDDQGQVINERGYLFGSMENFLGDRWQFATLDRGLQSSLSDYSYCDDNWTRNMTWRTMPG
TTDNANIRGAGFHGTLTGRMYGGIGANAINGSLLGAQERKNAYNYMEEFPLLSDPKINNK
STWSSRGEANSRSQMQGYEDDRVESIIYGVTRETKCSDTNIEGKNTAKRKVPDNGIDLSL
SLSMNLRQGESKRTRYWDVDEVDSTLSLSLFSSSQREKCSIDLNMGSKFSRLNEDNKFKD
PILASTLDLTI*

>g38014.t1
MHDSKTENAGAVKGIIGAIVDYSTRIGKEATVAMQMAVEDFNNQTKQQLLLLVKNSRGEA
AQATLAARHLINKKQVQAILGPQSWEETSLVAEVGSQYNIPILSFADSCPSWAINRWPFL
FQASPSKNLQMKAVAAILQSWGWRRVNVIYEDADSFVNDTTPHLYDALLEIGAQISHLTA
LPSLAAASLLSEELKKLKREQCRVFVVHASLPLAVSIFHIAKEMKMMEQGYAWITTDSIT
SLVHSMDVSTVLSMQGVLGVKSYCHEKGLKYQEFYQKFHGKFGLNYPEEKNHEPGNSALQ
AYDAIWTVALAKEGGDFNHKDLLDKLSIIDFEGISGKIHFSEQRLAPVNVFQIVNVIGRS
HRELGFWSDGIGFSMTLGDTAPTNVSMGILGQFFWPGRSPVTPRGWDIPTVANPLKIGVP
TSSVNQQFVIVGYDTYTRTHTFSGFSIDLFNETVKRLPYSLPYSFIPFDGTFDNLVEQVR
LKNFDAAVGDIAIVSERYVNADFTQPHMESNLELIVPIQTKSDKAWLFQKPFTKTMWLFI
ASANVYNGFVIWMIERNYCSELKGSPMNQIGTLLWLTFTALFSSRGEKLHSNLSRMATLV
WLFVALIISQSYMASLTSMLHSFQARTKGLKTGNIAGALLDAPAAKFFLAKYCKSFMATG
PTYKFGGYGYVILFPICFIEVLIYYFSIPSLSAKAFPKGSPLIADIDKALLKVFETGTHK
ELEDKLIASEKVTKHGLESSIIPLADVNGNTLTKMIDYCKKYVENENVHIENLKEFDERF
VVALEVDYVHGPYLALKYDVIMELVRFAS*

>g61937.t1
MEAMMMEQGNKFLNVGVLLMATLVVAKLVSALIIPRSKKRLPPAVKAWPVLGGLVRFLRG
PVVMLREEYPKLGSVFTLKLLNKNITFFIGPEVSAHFFKAPESDLSQQEVYQFNVPTFGP
GVVFDVDYSIRQEQFRFFTESLRVTKLKGYVDQMVLEAQDYFSKWGDSGEVDLKYELEHL
IILTASRCLLGEEVRNKLFDDVSALFHDLDNGMLPVSVIFPYLPIPAHRRRDKARMKLAE
IFASIIASRRQSGKTENDMLQCFMDSKYKDGRPTTEAEVTGLLIAALFAGQHTSSITSTW
TGAYLLCNKKYMSQVLDEQKNLMKRHGDKVDHDILSDMEVLYRCVKEALRLHPPLIMLLR
GSHSDFSVTTKEGKEYDIPKGHIVATSPAFANRLPYIYKDPDTYDPDRFAPGRDEDKVAG
AFSYISFGGGRHGCLGEPFAYLQIKAIWSHLLRNFELELISPFPEIDWNAMVVGVKGKVM
VRYKRRQLLVD*

>g26755.t1
MDKAETSATQQGEDQNQQQESQEMNTAHHLSLPSGLTQYEFDSLKHSITEFHSYRVNSGQ
CSSLLAQRIHAPLPAVWSTVRRFDKPQTYKHFIKSCSVGEDFRMTAGDTRDVNVISGLPA
ATSTERLDMLDDDRHVIGFTITGGEHRLRNYRAVTTVHEFDRGGRIWTVVLESYIVDVPE
GNTEEDTRLFADTVVRLNLQKLASVTEAMSRDHQTAGGGVGSGECGS*

>g66254.t1
MSGGGTQKSLRKTLGALKDTTTVNLAKINSDYKELDIAIVKATNHVERPAKEKHIRAIFA
AVSATRPRADVAYCIHALARRLAKTHNWAVALKTLIVIHRALREVDPTFQEELLHYGRSR
SHMLNMSHFKDDSSPNAWDYSAWVRTYALFLEERLECFRVLKYDVETDRPRTKDLDTPEL
LEQLPSLQQLLFRVLGCQPQGAAVHNFVIQLALSMVASESIKIFNAISDGTVNLVDKFFQ
MQRHDALKALDIYRRAGLQAENLSEFYEVCKNLDVGRGERFIKIEQPPASFLQAMEEYVR
EAPRSSTVHRDSTVDDKSKVTLAIEYKKTPEAKEVVTPPSPPPPEPEPEPETQPIKVEAP
VVEPPDLLGLNDPVPAASELDEKNAMALAIVPVGVAEQPVSSGLANGTARWELALVTAPS
SNESATTASKLAGGLDKLTLDSLYDDAIRRSNQNVSYNPWEPAPMPNPMMLPTAHDPFYA
SNTVAAPTSVQMAAVANQQQNFVLQQQSQMMMMGPQQPVNPFGNPYGAGVHPYGSGMPVQ
AYNPYSGLI*

>g32560.t1
MELIPGLPNDVAIECLIRIPFSQISKAASVSKNWKSEIQRPEFWQQRKAAGLTRPLVAMT
QARVNPNQNECDAKRLNYQLKICDLEKGFWYEVPPIPGFSEGLPMFCQVVGVGINLVVMG
GFDPVSWKTLNSVFIYDFLTATWRDGADMPGGQRSFFGCASDCNRTVLVAGGHDGDKNAL
RSAMIYDVAKDEWVILPDMARERDECKGIFHRGRFHVIGGYCTERQGDFQRSAEALDVDT
WKWDQVDDFLPDATCTRYCVSSFDGQLYMFLEGDLFQSENATWKALARLSTEVRDVVFLT
AWQNKILGSGLTVSCGSLCIYGIDLVNRAITKMEVPHQHSGHVQCGCYLGI*

>g28214.t1
MATTAGGSIAVSSFLSSSHISQKAKSISTLSLSLLTSKPIRYRRKIACFAVQESSAAAVA
AETKENKEEAKEEQKKPGTANAAAPAAKKAPAKAPSKPLPQLMDEEVIPSLRSTLEAEED
ISELELAFQDNKLEGSFLKKGKLYSFWAFFPDGNLTGPKGFCLSSYGSGASTVEPFLVDE
KRITAKHVVFWVEKRLAAQGIIPVWKE*

>g28486.t1.2.5bbdf93d
MVSSVHSLPFSSALPRLNPVPFPPPHPSSLSINHKIQKIPKNAKTQEKIPARALTCKAMV
EQSVVQGATAAYAKEMERLSAKESLLLAFKDAGGFEALVTGKTTDMQRIVVNERIVDLER
LNPTPRPTTSPYLDGKWNLEWFGNGSPRFFTAKLIFERFPTTLANLSKFDVLIKDEYVNI
TANLKFVNSIESKFTLSTRLSVEGPLRMKEEYVEGIFESPKINEETIPEQLKAAFGQVVS
TMQQLPAPIRDAAASGLKIPLGGSLQRLFMISYLDDEILVSSYFYVGCNVEIFCQKLSGH
SMHLLHYSLNLLAAYTTILISILRPRNHFFLWTPPFT*

>g60966.t1
MDQIQHKFIEVNDGLKLHVAEIGSGPSVVLFLHGFPEIWYSWRHQMIAVAKAGYRAIAPD
YRGYGLSDPPPEPQTASFADFIKDILALLDAFGIPKVGSFISG*

>g17306.t1
MKHKDKDGKPSYHPDKNSRTVPMAIMLVVLCGFSFYLGGIFCSEKDKYASVKENDAVESP
RSIAAGPLQIKDVSFHECGVEYQDYTPCTDPRRWKKYGMHRLTFLERHCPPAFERKECLI
PPPDGYKLPIRWPKSRDQCWYRNVPYDWINKQKSNQHWLKKEGDKFLFPGGGTMFPNGVG
EYVDLMQGLIPGMKDGTIRTAIDTGCGVASWGGDLLDRNILTVSLAPRDNHEAQVQFALE
RGIPAILGIISTQRLPFPSNSFDMAHCSRCLIPWTEFGGMYLLEIHRILRPGGFWVLSGP
PVNYENRWKGWNTTIEEQKSDYEKLQDLLTSMCFKFYKKKDDIAVWQKSLDNNCYKKLES
PDNYPTKCDDGTEPDSAWYTPLRPCVVVPGKKYKKLDLKSLPKWPQRLHVASERVADVRG
GSEGAFNHDDTKWKTRVKHYKKLLPAIGTDKIRNVMDMNTLYGGFAAALINDPLWVMNVV
SSYASNTLAVVFDRGLIGTYHDWCEAFSTYPRTYDLLHVDGLFTAESHRCEMKYVMLEMD
RILRPNGYAVIRESSYYVDAVATIAKGMKWGCRKEQTEYGVDKEKILICQKKLWYASSKQ
S*

>g75784.t1
MTNLRISISGQYCFQSLSSNLFEILPDFYSGDFSQRLLDHILAMEEGSTTNPSGHFDSET
ESCISLPQFEHHDDSVPSKMHRSFISVDRPMEDVNLVEQHYLNFQSTSSCSNQNSKSYGN
NFASQSRNAPQGKQAEIQPNESTANNATDWNKCCTISFEKNEKVENPSSSAITLERATTT
ARNRIRWTQDLHNQFIECVNRLGGAKKATPKEILKLMKREGLTIFHVKSHLQKYRVAQYL
PNSKEELMIELLPNADPRKIVDTLSTAELNQEMGMQMAEALRLQLDVQSRLHEQLECQRK
LQLQIEEQAKQLKKMFRQVENLLI*

>g74893.t1
MEKATENGAYSGVSLPTAGKVITCKAAVAYGPGQPLVVEEILVDPPKAMEVRVKVLYTSI
CHSDLSAWQGENEAQRVYPRIFGHEASGLVESVGEGVTDLKPGDHVVPIFNGECGKCGYC
KSDKTNLCEIYRVNPFKSVMTSDGKNRFWTKDGNPIYHFLNTSTFSEYTVLDSGCVVNIE
SEAPLKKMTLLSCGVSTGLGAVWNTANVPAGSTVAVFGLGAVGLAVVEGARARGASKIIG
VDINPDKRTKGQAIGITDFINPSDLDKPVHQEIREMTGGGVHYSFECAGNLDVLREAFLS
THDGWGLTVVLGIHPSPRLLPLHPMELFDGRRIVGSVFGDFKGKSQLPAFAKQCMSGVVK
LDEFITHELPFNKINEAFQLLIDGKSLRCILHL*

>g17155.t1
MAIDVCSEVSSLVASPRISFSHDLKETDVPCEGHQPRSDALLLESINFNFCISQSFSQGP
LSSADELFANGKIIPAEVKKITAAEVKKITTIKPSKETNSREIYRSKPISSCYRKDSSFK
ISATAGSSVTDNVEAALYLDTKKKSLKELLSINPEGESDAEIEEEKKPSFKPFWQFRRSS
SLNLDSSRSNTLIRSLHFLSRSNSTGSAPNPTPSGLPKVLKKQHSLKDQPSSNKRTNSSV
PSSSSHNFHSYGSYKSPSRKNYENGVRVSPVINISQACISKGTVSLFSFGSLFCNRKSKK
KKKCNH*

>g56681.t1
MYPRVKVREQEEYDDQYDFESRSLQSLRIPESLSLIDCSSPDNSPTSVVRVPQFHSSTSV
VIKDAINNSKQKALDENRTNIRASPVLRPRAVLSSPDNDQMVGSKNKTKGESLSSAKKQS
PYENKHARCKVIPRPVAADDSINTRRQLKEVAGSESDIRTRQRTKNSLRANLQAGRPKSV
KDRALRSLPTNE*

>g67779.t2
MLAKGTAIHRSFLVPLFALQAPNSIITWIRGEYGIWTAFLALLVRLFFFIPGELELPFVA
LLLVIVAPHQAMNLRGKQEGVIISFIIAGYLAFQHFLRAGSLRRAFDQVKCRG*

>g7780.t1.2.5bbdf937
MEQKRFTDASSNGGATAASTRRSAPPRQPNYTCPKVQEALDHLASIDPIELCNEAKVEHC
RATRDLRSCGRYVQSVLNSCGHASLCEECSQRCDVCPICRIPLTKDRNRLRLRLYYECIE
ACLISKRCDDRLQDKEDGDNELIADVQRLYSLFDVALENNLSSLICHYVTDVCMDESAVS
SDPVIAFLLDEVVVKDWCKRMFKNILGELQAILEELKESLSSLLKFSVKLAGLANVLDVL
ESSFKGSLSAKLHDLCRLQENILKTKQHIEVITWCSRHHFLENVKSRHANIVSWRSQVRE
RKSAAVKRAWPDLVTNSAAESARPDGSALFIEEALSNLDNELVHVDDPEEELQIALLQKD
GGSSFLRSKLEGLAGLYPFESLRAAIDVLFLRGSSDLVVSKQAIFLYYLFDRHWKIPEDN
WRDVVDDFAATFSITRHSLLESFVFYLLDDHTDEALQEACRLLPEISGLTVHPKVAQVLL
ERQNPDAALMVLRWSGRDEARLVSLEEAVTTVRVRVECGLLTEAFMYQRAVCIKVKEHKL
GDDSFQNASGETRDERWTWRQWVEVMVTEICCLCIRRNLVDRMIELPWNFEEEKHLHKCL
LDFATDDPSSTMGSLLVVFYLQRYRYIEAFEVDRKLMSIEQNFISKNSVSEQILIRMRST
SDWRSALVEKSIELLPDVLQQQLKNGKVAENAGVFPAKFNYAKEQGPILTSLLVPPVDSS
HVQGTDNVMTSPMHSILNNTPLKRGGSVNFQTNNYGNIGASIPSKEFFGEAEKGWKLDST
LKKNFRFDDVSFANHQTSLATSTIRQLKGSPSQKPRSIHRPNGSLNKFHGKNSYSQSAIG
NIVTPVRSSHGMFMDFAQDSSVLGKLAFSNITAVSQMPLSNDSMDVTGSHDERGLSVERV
DANGGPRWRSDDSSDGDENQNLDRIAVAATRNSRGIRRGRLLGR*

>g43429.t1.1.5bbdf939
METAGQWLEKALLELCKKTETGLDLDADILSGLVSYCEMASPLDAKEYLDNIIGQEAGKN
VIAEYLQRRGHSVTYNTSEDTPNSRLQAYVKPPSNDGLVIGAKKPQKTSKEVTSSSNQEN
NTATTGTSESRIANKGNSRKKKSGKVVSLAEASKGSIVYQQGKPCSCQARQHRLISNCLS
CGKIVCEQEGEGPCNFCGALVLREGSTYAGLHEGAVPLSEAEVAADAYAKRLVEYDRNSA
ARTTVIDDQSDYYEIEGNSWLSMEEKELLRKKREEIEEAERARRNKVVMTFDLVGRKVDF
*

>g38156.t1
MSAQQQQPQPMVPSHGGLPYHQPATLEEVRTLWIGDLPYWADESYLNSWFAHTGEVLSIK
VIRNKITGQPEGYGFVEFSSHAVAERILQSYNGAQIPGTELNFRLNWASFGIGERRPDAG
PEHSIFVGDLAPDVTDYLLQETFRAHYPSVRGAKVVTDPSTGRSKGYGFVKFADEIERNR
AMTEMNGVYCSTRPMRISAATPKKTTATALQQQYAVAKAMYPTPVYTPPVQTIPVENDMN
NTTPSNPSSHPQFVDKLLSVDVHLCRTSAEEAIQRMQGAVIGQQAVRLCWGRSPAAKQDL
PGPWGQPSDPSQWSSYYGYGQGYDAYSYGATQDPSLYGYGAYAGYLQYPQQAEGSQDSAA
ITASASASALEQRDEVYDPLATPGVDKLNAAYLAVHGSAILGRPLWQRTSSLAQKT*

>g12218.t1
MSGRGKGGKGLGKGGAKRHRKVLRDNIQGITKPAIRRLARRGGVKRISGLIYEETRAVLK
IFLENVIRDAVTYTEHARRKTVTAMDVVYALKRQGRTLYGFGG*

>g72394.t1
MTAPNTGTITASIERSLQNCCLNHHQSSGGGGGNSGDSNNSAGVGRTSFVAGRSSTSDLA
ENPQLPDNTLELNSEIRLPYYWEQCLDLKTGEVYYINWRTGMKSQEDPRTNPETDVNNRG
LLCSEDDDDSSYESEGSFTEESSPPTSRDQCRQYNPPLTPNIDNKPQLSQVLVVAGCKSC
FMYFMVPRQVEVCPKCFGQLLHLDRSENGFP*

>g35486.t1
MGNCEAKIVDPETGVAVPPGKQGELWIRGPIIMKGYVDNPKATSEALTLDGWLKTGDLCY
FDDDGFLFVVDRLKELIKYKGYQVPPAELEHLLQSHPDTAEAAVIPYPDEEAGQAPMALV
VKQPRNNLDEAQVMEFVAKQVAPYKKIRRVSFVSFIPKSAAGKILRKELLKLALPVSKL*

>g9730.t1
MAKQIFVLDLPFSSLVPLALLFLTLVIWLYASSRPQKRLPPSPPKLPIVGHLFQLGLYPH
RTLQRLSKKYGPLMMIHLGRKPILVASSADAACEIMKNHDLVFANRPKRSISDKLLYGCK
DIATAQYGEYWRQIRSICVLQLLSNKRVQSFRHVREEETSMMIQRIRERCSSSSSSLINL
RAVLITLTNDIICRVALGRKYRNDENRRKILKIMKEFGELLGTFSVEDYLPWIAWANRFN
GLDAKLEKVVKHIDQFLEGVIDEHKFRKKEEDSADSTEKKAFDLVDILLDIQNENLTGFA
LELDSVKAIILDMFAAGTDTTFTVMEWAMSELLRHPKIMEKLQIEVRQVAQGKLEITEDD
LDKMHYLKAVIKETLRLHTPVPLLVPRESTQHVKILGYDIPAGTEVMVNAWAIARDPVLW
KRPEKFLPDRFSNSTIDFRGFNFEFIPFGAGRRGCPGTSFAIAVIELALATLLHQFDFSL
PNGAKPEDLDMSDAIGFTLHRKFRLLAVAISH*

>g74380.t1.1.5bbdf93c
MAEEDCCSTQLIDANGEFNVVGLEKFTKTMNFSQCGLSYAVVAIMGPQSSGKSTLLNHLF
YTNFREMDAFRGRNQTTKGIWIAKGVGIEPFTVVMDLEGTDGRERGEDDTTFEKQSALFA
LAVADVVIINMWCHDIGREHAANKPLLKTVFQVMMRLFSPRRTTLLFVIRDKTKTPLEYL
EPILREDIQKIWDTVSKPRAHKDTPLSEFFNVEVTALPSFEEKEEQFREQVVQLRQRFFN
SIYPGGIAGDRRAVVPASGFCFSAQQIWKVIKENKDLDLPAHKVMVATVRCEEIANEKFS
QLSSDEGWLTLEQAVHAGPVKGFGRKLSSILDAYLSEYDMEAVYFEESVRNAKRQLLKSK
ALQLVHPAYITLLGHLRSNALTNFRVQLEQTLSRGEGFVVSVDTCMRSSMLEFDKGCSDA
AIKQADWDASKIREKLHRDIDAHASSVRTEKLSQLISKFEKQIIATLSEPVESLFDTGGK
DTWASIRRLLKRETDAAVSDFSTAVAGFQLDRGEFDKMVQNLKDYAISVVVKKAREQAGK
VIIKMKDKFIMVFNHDNDSMPRVWTGKEDVKSITLEARSAALSILSMMAATRLDEKPDKI
ESILSSKLMDGTVAISTRDRGAGDPLASSTWEGVPSENTLITPVQCRSIWRTFTAETEYI
VTQAISAQEAYKRSNNWIPPPWAIMAMVVLGFNEFMLLLRNPLYMLVLFVTYLIGRALWV
QMGIPGEFQNGTVSSFL*

>g61508.t1
MVSKTIPSSLQILTTFLIFCLLSLPCKPLKIEVQALLDFKSHLDDPLNYLDSWKDSDSPC
HFYGVSCDPRTDLVTEISLDAKSLSGVISPSISVLQSLTSLWLPSNMLSGSLPSGLANCT
NLKILNVTGNNMNGSIPDLSMLTKMEILDVSINYFSGEFPAWVGNLTGLVSLGLGDNMYD
EGEIPESLGSLKNLTWLYLAGSNLIGQIPESIFELEALGTLDICRNKISGNFPKSIRKLR
NIWKIELFKNNLTGELPVELAELSLLQEFDISVNQMHGTLPSEIGNLKNLTVFQLHTNNF
SGEFPAGFGDMQYLKGFSIYKNSFSGVFPENLGRFSPLNSIDISENQFTGGFPKYLCQNG
NLQYLLALQNNFFGELPDSYSDCKPLQRLRISLNRLSGKVPDGFWGLPSLQVLDLSYNEF
SGGISPAIGLATGLNELVLSNNGFSGELPKELGKLGLLERLYLNNNNFSGVIPSELGALK
QISFLHLEQNSLTGSIPGKLNQCSRLVDMDLASNLLSGGIPGTFGTMISLNSLNLSRNTL
TGLIPRNLDKLKLSLIDLSDNQLSGAVPSELLRMGGDKAFTGNKGLCIDESTRITANSRF
NICHGKMKQQNLIKSKLFITFFILFGIVIVLAGLLLVSYWNSKHSHTDIDKHLGDVKKPD
PKWKLESFHQIEFDADEICHVNEDNLIGSGGTGKVYRLDLKKGCGTVAVKQLWKGDAVKV
LTREMEILGTIRHRNIVKLYACLTKGCSNYLVFEYMENGNLFQALHREIKIGRTELDWYQ
RYRIAMGAAKGLSYLHHDCSPTIIHRDVKSTNILLDENYEAKIADFGVAKIADVSQESEF
SCFAGTHGYLAPEMAYTHKVTEKSDIYSFGVVLLELVTGRKPIEEAYGEGKDIVYWVAAH
LSDRENVFKVLDPKVACDIVQDDMIKVLRIATLCTSKLPNLRPSMKEVVKMLIDAEPITF
RSPDNSEKNAKVLL*

>g30564.t1.2.5bbdf93b
MLQRQLLFKQLQEMQHQQKLQDLSDARRYSFVNQLPFINKQTSAGLHPPLINGMPVHDAS
QMFTVGDMHLTQHGTSPIIQGVPNGLVFSQPQNQVIGSNGVLPLQFDVSLYGTPIASSEN
NMIPYSRIQGASHDSLSMLNRGNSSQLQIPVMQSSTVSNSFVKEQFNASPHKLCISNGVF
VHKNVTEDKNVFGQLLIDAPADGVLPANYQPLHSLQTNSAMKESGMRQQEAGGPVICAGK
TSNFCPSWTATSLDPLEKKILFNTDDNSWESSLGRQNNVGLAGFDSNGEHVGFMGAFSST
QSGSWSALMQSAVAEASGSDSGQQEEWSGLMFQNPELSADNQHINYMGDGKQIIWSDNLQ
RFLCPTAEPEIAFQNSNTNCSFPTFQQSNNLDRPKEGMHSDASHDSVQQSPKNASRWFEG
NLQHKQTAEGCQLVQTLRPLQNAWHDQQTQNSNNDRCQQSISPYTVSGQSGTDLIGHNVK
GNMWQLESGSQPMVGGSQRPPDQAPHAWSNQEYVEQLRYVNKVASVGMNSEKVLSHFQTN
SRASEELPRRNKVDSIAALFDSSAGFSGPSIITKPSGDRIDLLNKADKSVDIRSGSKDSV
PFSQVPKIEICNFYYNPSASQGCGLRLAPPSQQIPQSCLSFGSPSLGSSSEISASGPLYL
KNQLKSQNQLFIPVASQLPHASLPAFTDVFQTRIATSGDTSDPFQTTIQGQEFPTLESLS
ATHPSSTSSVPQQIGLSMKPSNMSQNVPTQPDVLQSEVPNVYSNSLPSPNSTNSNADVAR
EAPHLQYKQVTFQNGDNIKETNDCSLTKQGYDCEEDQVDQLNSLGKSKPFSQNTIDHGDK
AVKKHLSGGNATTYISMRTATHHQAFDRVEQMDNNTTTVSGSDTGTFVSSLRPHSFHQKF
SPLHQVNADARQKLFYGLKSGVTNLALDDPNLNSQLNSISFWDNKPMTCLSEASGNKPGT
PSSKVIVQDSRMIALGENGTRSDSREQSQINVQMAPSRFEPCESMKDGQMVSMYDSMGTK
EAAKQFSVGQVNSSIASQPSSVLSNSASKLGTDKQLSPSFFMPLNESEQNLAVTTPKKRK
LASFELLPWNKEVTQVSLQLPKVSCIAESEWALASNRLNEKVEDDAEMMEDVLPLSQAKK
RLVLTTQFMQQVFRPAPAVILSADACSNKESVVYFVARLALGDACSMTSSFQKPPLTSDV
TSKNPGASDGVDQLDFSEAAENFINRAKRLGNELLRLDNTLSSVDIKVDSQELERFSVIN
RFAKFHVRGHSVSVNTSSSSGANLAVHKTSPQRYVVAHPMPKVVPEGVNCISL*

>g46489.t1
MLPCLKPSPSNATTNSHASQQFSQGSLDEAPNSSFQPSPTVNLTSEYKLAVQTNSYSEIW
TKIHHDSHSDEKVDIGQVELLEESELLEQVLHPSRECVLEALSYIKPSALTELVTTYFNH
SESTSRLCLFIHQSVHRARLIYAPFDNLLDILPVDLDNGAHSLTQFQCDTVFDLFLQFDQ
FDNPFPSPGSYNFDDMRRCFSQLRQELDHRLSKSRSKVHLLRHATSGSVICLIAATVGVV
VSAVAIATHAFAALVASPLCPVCLPSKVSKKELSHLAQLDAAAKGTYVLHNDLDTIDRLV
ARLHTAFEGDKLLIRLGLERGRDRHSIQEVVKQLRKTHSNFLQQLTDLDEHLCLCFAAIN
RARSLLLGEIQIY*

>g2508.t1.1.5bbdf940
MDTFLFTSESVNEGHPDKLCDQISDAVLDACLAQDPESKVACETCTKTNMVMIFGEITTK
AQVNYEKIIRDTCSSIGFVSDDVGLDADNCKVLVNIEQQSPDIAQVVHGHLTKRPEEIGA
GDQGHMFGYATDETPELMPLSHVLATKLGARLTEVRKNGTCPWLRPDGKTQVTIEYYNDN
GAMVPVRVHTVLISTQHDETVTNDEIAADLKEHVIKHVIPEKYLDEKTIFHINPSGRFVV
GGPHGDAGLTGRKIIIDTYGGWGAHGGGAFSGKDPTKVDRSGAYIVRQAAKSIVANGLAR
RCIVQVSYAIGISEPLSVFVDSYGTGKISDKEILKIVKENFDFRPGMIAINLDLKRGGDS
RFLKTAAYGHFGRDDPDFTWEVVKPLKWEESRA*

>g47734.t1
MGSSSHDDNQSLLQSINEPSSSSQLLGKENQLSDELERILSSSEGPWFQRFWLATLVELK
LLFYLAAPAIAVYTITFVMTMSTQIFAGHLGNLELAAASLGDSGIQYFSHGIMLGMASAV
ETLCGQAYGAQKYEMLGIYLQRSTILLILAGIPLSVVYIFSKPILLLLASSAVMLSLEEW
YYQILVLMAGLLPNPELTLDAISICFTIFAWTFMISIGFNAAASVRVSNELGAGHPKAAE
FSVLVVNVVSFILSVAAAIIVLMLRHVVSYAFTEGEVVAEAVSNLMPFLSVTIVLNGIQP
VLSGVAVGCGWQTFVAYVNVGSYYLVGLPLGALFGFYFKLGAKVSSPQDKYVS*

>g50143.t1
MTVLSAIGFEGFEKRLEITFSNPHMFTDPNGLGLRALTRFQLNSILEPACCTIVSQLLNA
EFDSYVLSESSLFVYPYKIILKTCGTTKLLLSIPQILKLADSLSLDVNSVKYSRGTFIFQ
NAQPAPHRSFSEEVAFLNTYFKIGSGNVLADPNFPNRHWHVYVAQVGPPTSGDQKAVFAF
EMCMTGLDREKAAVFFKTSDGFNEMTKKSGISEIITSHEICDYAFEPCGYSMNGIEGSAY
STVHVTPEDGFSYASYEAAGLDFGSKNLGGFGSLVERVLRCFGPLEFSVAVTSLGGGDIC
GAQLGFWDGDVEGYTCENGLKQELPGGGCVVYRCFAARGKEEKWRVEETPKSVFFPTGSG
GGQGRGGGYW*

>g14981.t2.2.5bbdf937
MEAEKLRGRQQNRQQHRTQICIQNEPTSSKPRQQRKKKEEMPMEKKKKVVAEKPKTSKSK
GKKVNSDTAKNSQSIKRKRTGISDIYDDVESKLTVMERAARVLASMEDGAPYFLKCMLPS
NVTYSFWLVSFKICPVLSDSEIGPLKVNIFCFLLFSPISVLFFLSSFSLSQIIPRKFGSL
HLPSQDSTVILVDEWGKEHKTTYLIDRNGLSAGWRGFSMSHRLLKGDILIFRLIGPCKLQ
VHIVRVHGLDVLNAALCLMNMDAFGKTMDSDPAKKDNRKRKRPKKYADCSLLDAPKIQDK
VQEKGKMVLKSDLVPVADQSDNTSDDFGSEVLEGMIF*

>g66419.t1
MLMPGSPLRRIVLISTEKEVSDPLERSAAHISKGMCLISHVRSPAGNTSKHEQAASCLKG
DDSEKVIYSMFGDLSDTIPRSNEIAKGVPSRTAKGISSLSFGNGHFDNSAIQNYGVSESL
LGQLDKCKLVVSPSKGDDGVKIDN*

>g45373.t1
MPLILEITFDKGLPVVFPPRPGHDSVFRQMGQFWFGSQDSQQLFYSATAINTLSRGQTLS
GNQTLVSKDRTFELGFFTTGRSNNIYLGIWYQGLEQKTVVWVANREEPISNTSRNSRLEI
SEDGNLLLLNESGTVWSTNLVSSSSRSIEAVLLDSGNFALRENSNSSILFWQSFDHPTDT
WLPGAKLGYKRLSVNNQQIIEFQSFVSWKSSDDPSSGMFSLVVDPDNLGRVLLQWNKTVS
YWNSGIFPGIFASLSEIRNIANMSFVSDQNETYYTYSMYQKDAVLWRFIMDASGQLKLTQ
IVPSFSFGVPGLTFAAPKDQSEVYAFCGEFGVFTNNPSSSCICLPGFESINDGLPHCLRK
TPLRCENNTTPTAKKDGFRGISNIKFPANSNSHLVQNAEGCKSACLENCSCTAYAYNGSV
CSVWIGALLDIKQVSDFVDAKQELFLKVATSDTQDAGGEPATVSGNKKKMIIAVVVAAPV
LGGFIWFGLRKIRKRGSGKNEISEDLLSFDFTASNSITTENQMRNANYVRNGRKSGIDLP
QFSYASVSAATDNFSEDEKLDTLTSRFSYWKQGKSLKGQEIAVKRLSRGSGQGLNEFRNE
ILLIAKLQHRNLVRLLEIPKDVALEWGTRIRIIQGIAHGLLYLHEYSRLRIIHRDLKASN
ILLDSNMNPKISDFGMARIFGGNDSETNTRRIVGTYGYMAPEYALEGLFSIKSDVFSFGV
LVLEIVSGKKNTGFYNSDSLNLLGYAWELWNSNRVPELMDPLVGCPPAVAVLRCINIGLL
CVEEKPNDRPNMSSVVSMLGNELVALPPPKQPAFTAIRIVAETTSTPSNDQKFSLNGLTY
SSVEPR*

>g32550.t1.1.5bbdf938
MDDTEDDARYPPNTYGMSQGYGSSNRQKLPAQNTGQNVNNRYVDVDDVDDEEEEEVEDEE
DDENEENGVQRVGRDEYDDDNEDDEDDDYGDMQRHPKKRKLRSLLSSYEFAPRVPAPSAA
PVPAAKASFGGRNSVADWSEHETFILLDAWGDKFLQHGRKSLRSEEWQEVAEKVSQKSKI
ERTDTQCRNRLDTLKKKYKKEKAKLAETVNFVSKWVYFQKMDMLLSSPPQQAGLSCGVDS
GEYVFMNPGDYVNRSNGLDEMRDSPGISESAEAADDDSEGLPPKRTKSGRDRGNGGSFKL
LADSIQKFSEIYEKIENSKRQQMLELEKMRMDFHRELELQKRQILERAQAEIAKIRQGDD
EDNDVSAENISR*

>g952.t1
MEASFVSKARTAFHSAAAKAEKVFADIKKSDSSSDRDSARQSPITSSPDSVNSKDESKNS
GDAKNSRWRPSRIKAKHNWRERFKNLRIGKRGAEETEKAENSTMANEIFDENICFMSERE
FKGPEAAAEDSNISNENIIPPTSTMRQLAIAVE*

>g62145.t1
MAGAASALFLLDIKGRVLVWRDYRGDVSAAQAERCFTKLIEKEGDPQSQDPVVYDDGVAY
MYIQHNNVYLMTASRQNCNAASLLLFLHRVVDVFKHYFEELEEESLRDNFVVVYELLDEI
MDFGYPQFTEAKILSEFIKTDAYRMEVTQRPPMAVTNAVSWRSEGIRYKKNEVFLDVVES
VNILVNSNGQIIRSDVVGALKMRTYLRYVLYCNTCNINISK*

>g3896.t1
MGFSINSPDCNNVEKSHYHTHKIFLFSNYILLGAASSCIFLILSLRLVPSVSGFLLILLH
ILTIAGAISGCSAASGGSNKWYALHMVATVLTAIFQGSVSVLIFTTTSNFLGALKSYVRE
DDAALILKLAGGLSIAIFCLEWVVLVLAFVLRYYGFVEGNNGSKVQDGGDRGKWASPFQP
FQV*

>g9962.t1
MDSGCISNILAIIAIALCLCVQGSLGNIVCENLNKDSCAYAISSSGKRCVLEKHVRRSGE
EAYTCRTSDIEADKLKDRIETDQCIQSCGLDRDALGISSDSLLEPRFTQKLCSPPCYRSC
PNIVDLYFSLAAGEGVYLPKLCEAQGANARREIAEIKSSGFVAPGPESGGVKPVSLFIAP
TLPPY*

>g48041.t1
METAKLEHMGSENLSSISEVNELEEKGAQKISVSHGLDYTGQKPPDSFIVDIERFASHLA
TTDKDINANSRITLQRSLSRKGSQQRGAEKKSNGITNNERDNGSVAISPKASLLHGGSTP
EKPMVVTVGATEHCHNPQVQNAITIMTGGATAAESKCTTVSRRFSFRRSSSSSWTIDPKR
ILFFFATLSSMGTILLIYFTLSMNKFNGDDNGLN*

>g28196.t1
MASGSSKCIMEDMKSNVMAIGKYSVVNPDQGYPLPDNLKINVRVISPHRNNYHLADQLES
GTFAFTAAEGGDYMAMEIELNKLYRTVMSIHGEMFNLREREEEMQALNIATNSKMATFGF
LSLLVCLSVAGLQLWHLKTFF*

>g51042.t1
MASGWGITGNKGRCYDFWIDFSECMSRCREPKDCALLREDYFECLHHSKEFQRRNRIYKE
EQRQLRAAGRKVDDSGHDGSHH*

>g54477.t1
MSDVAGENPGSDNEGGHKPVITGESKPVITGESKPNVPINTTEERFSTWTESLGSESFNE
RFACGDTLQAEEGRYQPPTVGVAGGSGVGTGSGSRRGKRRRKSTWLDMSSFPPLLSTLNK
NGRPGFDFIKTRENGRLQIKMVKSERPGVVTLQTPPMRKDKRLKMLIIKAKAEDHDQDQP
HDPDDDQETGADDNNQDQKEESNVGNGAPDHQV*

>g37971.t1
MGCSFSGLNALYDAVNGGGDVWINENRFRIIRQLGEGGFAYVYLVKEIPSSNPSSNAGLS
KKIKDSSHLSEDGTYAMKKVLIQNTEQLELVREEIRVSSLFSHRNLLPLLDHAIIAVKAT
QDQSWKHEAYLLFPVHLDGTLMDNSNAMKAKKEFFSTSDVLQIFRQLCAGLKHMHNLEPP
YAHNDVKPGNVLLTHRKGQPPFAVLMDFGSARPAKKQIRSRSEALQLQEWASEHCSAPYR
APELWDCPSHADIDERTDIWSLGCTLYAIMYGVSPFEYALGESGGSLQLAIVNAQIKWPT
GPNPPFPEALRQFVTWMLQPQATVRPHIDDIIIHVDKLISKFTN*

>g29546.t1
MAFSFDASFFSVFSVVILLSIWKWFYAASKPQKNLPPSPPKLPIIGNLHQLGLFPHRSLQ
SSSKKYGPLMLLHFGSKPVLVASSSDAACQIMKNHDTVFSSRPKLGIPDRIFYGGRDIAF
APYGEYWRQVKSISVLHLLSNKRVQSFQHAREEETSLMIEKISQMCSSSAVNLSDIFITL
TNDILCRVALGRKYSEEENGRKCVENMKVFVELMGIFDVGYYIPWLAWVNRLNGLDSRVE
KLVKELDAFLENVIDEHMNLRKGEAKIDGTPEARCSDFVDILLEINRENLIGFALDNDAM
KALILDMFAAGTDTTHSVMEWAMSELLKNPKVLQRLQAEVRQAAQGKPDITRDNLENMPY
LRAVIKETLRLHPPVPLLLPRESTSDIKIMGYDIPKGTQVLVNAWEIARDPMLWENSEEF
HPDRFLDSNIDFRGFNFELVPFGAGRRACPGINFAMSINELAVAKLVNKFNFALPDGIKL
EDLDMSEAAGITIHRKHPLHVIATPYSC*

>g8396.t1
MNQTCLNLGNNPIRDAISRIRFAPNSNNLLVSSWDSSLRLYDVDSATLSLEASDEYPLLD
CCFGNDSLAFSTASDGFIRRYDLHSGDAGRIGIHDEATCVEYSIQTSLIVTAGWDKMMKF
WDTRSAESVQCMNVGGEVESMALSGFHLMIAVGTSVSTYDLRMLCNLAQAQESFMDIRIK
CVRPILGFEGFAVGSFDGRVALEYANDSNSKNRGYAFRCHPKKKDGRLHCVPVNDITFNP
CMSSTFVTGDNEGYASTWDAQSKKRLYELPRFPNSVASLSYNHNGLLLAVASSYTYQEAN
ERIQRQFKVDLSGEACKAVPFQLDKWTEFMCLVSSALLTVVYAVRLVWKLHLMALVFWKE
MEVLHFCGNSEAGALKLKCLVLVSKPKAYSLKISSKSNQTQFLNLDPQRTFNIHIISEDA
KNNAGTIRKNGYIVIKNRPCKVVEVSTSKTGKHGHAKCHFVGIDIFNGKKLEDIVPSSHN
CDVPHVNRTDYQLIDISEDGFVSLLTENGNTKDDLRLPTDESLLAQIKDGFAEGKDLVVS
VMNSMGEEQICALKDIGPK*

>g36963.t1
MISISLAKNKLEGRIPFQLTNLKKLELLTFYQNMLTGKIPSSMGNLSSLTALNLGQNHLE
GNLPIEMGMLTSLSLLAVAVNKLSGVFPASVYNISALAIISLADNSFHGNLPSNIGHTLP
NLQAIGAVGNKFYGKIPISITNASGLEILDLSGNKFEGKVPTNLGHLSNLQRLGLGWNFL
GSSSRGDLGFVASLTNCSNLQIVVLSNNNFGGEMPKVIANLSYQLTQFRIATNRLSGTIP
EGLGSLVNLYHFQVAYNSLSGEMPSDFALPNDRMPMDEIIRKLHLIKDAIFGSRINIADL
DI*

>g6963.t1
MIERGYNHDYYVHSVSLVMKGVEYSFEKVLTTRVALDFSSNRFEGEIPNLIGNLHSLQIL
NLSHNNLSGHIPRSFGNLNLLESLDLSWNQLKGTIPLELLNLTFLEFLNLSENHLVGRIP
QGRHFDTFGNNSYLGNSELCGTPLTKDCSGTRAPPPTLGLEQDYDPNFFDGFTWKAVLLG
YGFGLLLGLAMGCLMFSFGKPRWFINIVEETYKLRKSPRKWIHIQA*

>g15648.t1
MYWKPEHPEWLPDSSRTICMQYNAPFTSLTRGRHHCRFCGGIFCRTCSKGRCSLAVKFQE
KNPQRVCDPCYDRLDPLQGVLINTIKNVVQVAKHNVIDWTSVAHLNPEKSIPAAVLRGAK
GLAILTVAKGGVVLAYKLELAWLLLEEQIDHGQLYQLYSLLAWDGVPRYTINMKVGGELV
DFIIVLRDSKVVKTFCYCMHVSLGAGCSAVAGPVGRVFEADVWVVERGSGMCYTYRCSKD
AFVGVSPEGNIVSTRMDTNLRFYGDPYLAIADILRRTVDRPKATEPLHAALKDLYESFWC
*

>g68589.t1.2.5bbdf940
MNPSENYSVMTHTYTVQTSSDDEDMTDSITDMAASVRTVEKLLNYRFKNRKLLEEALAHP
SYTDSASYQRLEFVGDAALGLAISNYMFSAYPDLDQGQLTLLRSANVSTEKLARVAVTLG
LYRYVRQNAAALHEKVRDFAIAVQQEDETEVYGGAIKAPKILADIVESVAAAVYVDCGFD
LQALWVNENARFHAAKAALQKLSYKTGDKISMDILGDLNGSSEIEGAKQKLHQLCVKKKW
PKPKYRR*

>g26004.t1
MNQRDIWECDEDDLFYAELRRQVLVLTAEDDEECQENRQPKTDKPLQQRVNTSPASMLPP
GCYYNWSGSDRTESVPTWLFNLWKSGHGTGVFIPQIIKSRRRYRPRKKNNERGRMHKAVA
NVN*

>g74115.t1
MDHGRYGLQQGWENNSALEGYGPVHEPNFRVGGSYDDRRFIDERFSRDSVYSRSAFHRDV
LEREDYPPAPVGLWPQTRRRAYEDEYPLERESRRHEKPYADPYHEMDARNVEHYHDHGFD
RPSRYSGRDHDDYAYDDYDYRTRISHSSREDSRERDYNYGRHSYDSDYERGNRRDGNWRR
RGSHERERDKRDLSRERDQSPYRRNERSRSRSHGRDDRPRSRSPRGRSHGRSHREDSYDD
SRYERSERRRDRDDKRQYEHYSVAPSATVVVKGLSQKTTEEDLYQILTEWGPLRHVRVIK
ERNSGVSRGFAFIDFPSVGAAQAMMDKLGDEGLVVDGRKLFFEYSSKPTGWASGSHGTEN
SSRSGHGNHRSVTIPSDWMCTICGCVNFARRTSCFQCNEPRTDDAPPADMASSNPTPLGK
RGEAGPTHVLVVRGLDENADEEMLRYEFSKHAPIKDLRLVRDKFTHVSRGFAFVHFYSVE
DATKALEATNGTTLEKNGQILRVAYAKSILGPGSGASGASQSSSLAAAAIEAATFAQQYD
AVGWAPKEYNPDDKQSSGAQEQGDGVAGQNNVSVPQSGFVWDEASGYYYDAASGFYYDGN
TGLYYDGNSGIWYSYDNQSQKYVPCTDQNDKTAEKQSITSKTSDGSSNRKVVISAPAATI
TSNEKAASLPDAIQAAASAAIAAEKKEKEKSKEIRLASKSSILANKKKMSNVLTMWKQRS
HEGQAPRVALDENLPFALTEDRSNLVGLSTKNKFKTEAVTSKENVTTTSGFATNSAIQTG
GESEDRQRPVSSSFSGTLKGVIRGSGMGVIKSDTLYTGSSGSASTPAAASTAALSQSTNI
DATTAPTPFKTDSSSLGSYASAVPAGTGKRRFSEMPQQAPLPNKDHITYRDRAAERRNLY
GSSSSFGEDLSQLEAGDSNRESTVRRGSLDSMPFPPGVGGGRGTGDASSQSYDVITADRA
IDENNVGNRMLRSMGWNEGSGLGKNGSGMVVPVQAQAMDGRAGLGSQQKKVDPNLEVQAG
DSYKTLIQKKAIARFREMS*

>g54644.t1
MKTRTIFGISLSLIIINMAAIMERADENLLPSVYKEVSEAFSAGPSDLGYLTFILKFIQG
LASPVAGILAISYDRPTVLAVGTLCWALSTAGVGVSMSFPQVALWRAVNGFGLAIVIPAL
QSFIADSYTDGVRGSGFGFLSLVGSVGGIGGGAIATVMAGHDFWGVPGWRLAFILTAILS
CLIAFLVHTFVADPRKRSNTDHDTSKTLSRDELMEKGNSNSASLWAESWQAMKAVTRVPT
FQFIVMQGLVGSLPWSALVFLTFWFELIGFDHNSSAALVGFFAVGCAIGSFVGGIIGDKM
ASLYPHSGRIMCAQFCAFMGIPFSWFLLRVVPQSVSSYFTYAVTLFLMGLTTSWFVTATN
GPMFAEVVPAKHRTMIYAFDRAFEGSFSSIAAPIVGILAEKMYGYDAKSIDPILGSRREA
LALSRGLFSIMAVPFGLCGLFYTPLYWTFRHDRENARIAAAKEAEMT*

>g48264.t1
MAQVNISDDEVDIVIGALHSDLTSFMEGWRAVFSRFHLIIVKDPDLKEDLKIPGGFSVDA
YKKSDIQRVVGSSSIVNFSGYLCRYFGYLMSRKKYIVSIDDDCIPAKDDKGELIDAIAQH
ITNLTTPATPFFFNTLYDPFRKGADFVRGYPFSLRSGVQCALSCGLWLNLADYDAPTQAL
KPGQRNSRFVDAVLTVPVRAMLPVSGVNIGFDRELVGPALLPAFRLAKEGKFRWETVEDI
WSGMCVKVICDHLKFGVKSGLPYVWRKERGDAIESLKKEWEGVKLMEEVVPFFQSMRLSQ
AAVTAEDCVVEMAAAVKERLGPLDPVFARTAETMVEWVKLWKAVTNESIAT*

>g23195.t1
MEAARNIISSPPTFSSRTHLKNCSPSYSSTSSSVLMLREQVAFVLTYMPAASLLVICYLN
LYSGAA*

>g69714.t1.6.5bbdf935
MKKVKPRTIRTELVPVRRSGRFANKPAPHYKEVIFYERVQLPRRIVYPKRDLSNRVYASD
EARAWAIEKAEKLESNLDGDYPTFVKPMLQSHVTGGFWLGLPSHFCKRHLPKRDDTVTLV
DEQEDKWPTIYLARKTGLSGGWKKFSVDHDLVDGDALVFQLILPTVFKVYIIRENGFSED
NTHQAASKV*

>g28108.t1
MSACIYLTGPFSFTISSEFISTKKENPTSVSWSSSLPKLNLSISTSLPRPLNLLHKQSFI
VKAAWTRRSRSEAAKKPNRKSWKQRTDMYMRPFLLNAFFSKRFVHAKLVHRGTSKVISVA
TINAKDLRNTLPSLTDNNACRVIG*

>g7803.t1
MPDDIPGVTSPMVYIGMLFSWFARHVEDHELHSLNFLHTGSPKTRYSVPGDYAFDSEEII
RLHTLGKNISPLGVKLIALEITYHSFAHS*

>g20683.t1
MIRFDLIEICQILAEGMRLDKKLVKQEKKTKDISSIKARKPTEISSVKANELATWNQRRH
DKWFGDERNKEMVVHFVVVDLAESSGGGKDGTCDL*

>g11016.t1.2.5bbdf938
MVLGYFESCNFLVSWMFAAMRFMETETMAIIGPQSSVIAHVISHISNELQVPMLSYAATD
PSLTSFQYPFFVRTSPNDLFQMAAIAELVEYYEWREVIAIYIDDDFGRNGIVALADQLAA
RRCQISYKAPLIADATLSDIRDVLVEVALTESRILVVHTYPNKGLEIFAVAKYLGMMDNG
FVWFATSWLTTILDTESPLTSEAFDNIQGVITLRIHMPQSQKKTDFISRWTNMTMKESAR
RRIGLNTYALYAYDTVWLLAHAIDTFFEKGGNLSFSPYSRLSELGKGSLHLHSMSIFNGG
NLLLDSILQVNMTGVTGLYSFTSDRNLIRPAFEVINVIGTGWRRVGFWSNYSGLSIVPPE
TLYTKPPNRSSSNQHLNTVVWPGETTQKPRGWVFPHNGRQLKIGVPNRASFREFVEEVPG
TDMFKGYCIDVFTAALNLLPYGVPYKLMAYGDGRTNPSGTELVRQITAGVYDAAVGDIAI
TTNRTRMVDFTQPYIESGLVVVAPVRKLNSNAWAFLRPFTRQMWGVTAIFFLIVGAVVWI
LEHRINDEFRGPPRKQVGTILWFSFSTLFFAHRENTVSTLGRFVLVIWLFVVLIINSSYT
ASLTSILTVQQLFSPIKGIESLISSNDPIGYQLGSFSRDYLIEELGIRESRLVPLNLPGD
YVKALKDGPRNGGVAAIVDQRAYIELFLSTHCEFSIVGQEFTKNGWGFAFPRDSPLALDM
STAILKLSESGELQRIHDKWLQRSACSSQSTKLEVDRLQLGSFSGLFFISGIACLLALLV
YFILIVRQYMRYHSEPESESSGQSSRSARLQTFLSFVDEKEESVRARSKRRHLEGVSDLS
IYEDASVNGSKRYRSEMSSKRSVSFADLA*

>g28583.t1
MKLIHLANPIFFLVICVFFCVLEKSSASDPNYEACAPKACGDVLIRYPFYIQGLQQSYCG
YPGFELDCRNSQTPVIHIPENDYVIDKIFYENLTLLVHTAAVSSNRNCLPQIKNVTANAQ
YGIVDTSRLHLLSNCRSPLSDVLSRYIIRYCDNESRDALGLAMYADDKNLTIALEYCKIN
VLAPVETDTTRTGTGVIDYEGLLSKGFVLNWTATDCSVCERSGGRCSFNTSSFTFWCFCP
DRPHLISCQRKFFNAL*

>g853.t1
MDVDSNMVTSEESDQDPTTTTATANGPTSSEQMSGGSDNGGSQGSQESAQQSQGQPQSSS
QQQQSSNNSPVVGPRCAPTYSVVNAIIEKKEDGPGPRCGHTLTAVPAVGEEGSQGYIGPR
LILFGGATALEGNSAASGTPSSAGSAGIRLAGATADVHCYDVLTNKWSRITPIGEPPTPR
AAHVATAVGTMVVIQGGIGPAGLSAEDLHVLDLTQQRPRWHRVVVQGPGPGPRYGHVMAL
VGQRYLMAIGGNDGKRPLADVWALDTAAKPYEWRKLEPEGEGPPPCMYATASARSDGLLL
LCGGRDTNSVPLASAYGLAKHRDGRWEWAIAPGVSPSPRYQHAAVFVNARLHVSGGALGG
GRMVEDSSSIAVLDTAAGVWCDTKSVVTSPRTGRYSADAAGGDAAVELTRRCRHAAAAVG
DLIFIYGGLRGGVLLDDLLVAEDLAASETTAAASHAAAAAAASNVQPGRLMGRYSDEGMR
QTVTVAVPDGSVVLGNPVASSVNGDMYTDISTENAMLQGSRRLSKGVDYLVEAAAAEAEA
ISATLAAAKARQFNGEVEIPDRGDRGAEATPSGKQISSLIKPDSATSTNSASAGVRLHHR
AVVVAAETGGALGGMVRQLSIDQFENEGRRVSYGTPESATAARKLLDRQMSINSVPKKVI
AHLLKPRGWKPPVRRQFFLDCNEIADLCDSAERIFSSEPTVLQLKAPIKIFGDLHGQFGD
LMRLFDEYGSPSTAGDIAYIDYLFLGDYVDRGQHSLETITLLLALKVEYPVNVHLIRGNH
EAADINALFGFRIECIERMGERDGIWAWHRINRLFNWLPLAALIEKKIICMHGGIGRSIN
HVEQIESIQRPITMEAGSIVLMDLLWSDPTENDSVEGLRPNARGPGLVTFGPDRVMEFCN
NNDLQLIVRAHECVMDGFERFAQGHLITLFSATNYCGTANNAGAILVLGRDLVVVPKLIH
PLPPAFSSPETSPERHIEDTWMQELNANRPPTPTRGRPQVANDREICT*

>g58279.t1
MGRKPCCPKVGMNRGAWTPAEDKILTDYIKLYGEGKWRNLTKNAGLKRCGKSCRLRWINY
LKPDIKRGNITVDEEELIIRLHKLLGNRWSLIAGRLPGRTDNEIKNYWNTILARKLHGHA
DAATSSTRKPSGRSGEIHKKETSMPLKGKKLEVEPAMRAKAMKVSKVLDLMNNNANQKGM
TETMENNGKEHENSVLKQSYILNYENELGEQDQLLSLFTTEEENNTSNFMLVDYTWDDSN
LSDLLDSSEFSNCCGLMSHENDMNMDIDWMLQTAIWMSP*

>g20408.t1.2.5bbdf934.1.5bbe19fa
MSQLGHVSALSTSRQTGVVNVWTSHSAWRGGRCFGSGQTHAFSFGNSDSMGDKLKVPCAN
SVVMRSRKDASPLEVVCIDYPRPELENTVNYLEAAYLSSSFRTSPRPTKPLEVVIAGAGL
AGLSTAKYLADAGHKPIVLEARDVLGGKVAAWKDDDGDWYETGLHIFFGAYPNMQNLFGE
LGINDRLQWKEHSMIFAMPNKPGEFSRFDFPKVLPAPLNGIWAILKNNEMLSWPEKVKFA
IGLLPAILGGQSYVEAQDGITVKNWMKKQGIPDRVTKEVFIAMSKALNFINPDELSMQCI
LIALNRFLQEKHGSKMAFLDGNPPERLCMPIVDHIESRGGEVRLNSRIQKIELNDDGSVK
NFLLNNGTLIRGDAYVFATPVDILKLLLPDYWKEIPYFRKLEKLVGVPVINVHIWFDRKL
RNTYDHLLFSRSPLLSVYADMSVTCKEYYNQNQSMLELVFAPAEEWISCSDLEIIDATMK
ELAKLFPDEITADQSKAKILKYHVVKTPSDCAMDHGHEI*

>g72965.t1
MAMQKNRGEKDDILESRSAISASVIDSSLSLLRVLSILIIFVVGVVIGLVSSSHIGRYFT
TKEFYSNRAVIFDDENCTIVINNCEKEDCLSMENFIRPKNLTHGLSDDELFWRASLVPRK
KEFPFERVPKVAFMFLTRGPLPFLPLWERFFRGQDQMKYSIYVHALPGFQLNVANSSVFY
RRQIPSRRVEWGTVSLVDAEKRLLANALLDFSNDRFVLLSESCIPVYNFPTVYRYLTGSM
HSFVQSYDDPSRYGRGRYNRRMQPDVRLADWRKGSQWFELNRYLAAIIVADTKYYSIFKK
HCRPACYPDEHYLPTFFHMFYGAMIANRTVTYVDWSVTGPHPKTFSAVNVTEDFIQSIRS
NGTACSYNLKTMTNVCYLFARKFTPDALEPLLSLSSKLMQY*

>g55813.t1
MQPQNTLSESLDFYHYSAGTTSLSDVGTYGFLQPSYDYPAFTQSCCNSSFNSLEMYDITD
CTPEARALASSQQHKEAERRRRERINSHLDRLRTLLPCSSKTDKASLLAKVVQQVKELKQ
RTSEMMQLDTFPSETDEISVMSYDDDSSDGRLLIKASLCCEDRSDLIQDLIEILKSLHLS
PLRAEMVTLGGRIRNVIILAGDKDHSDEYVLSLRNALRSLVQRLNYGSGDRPKRRRIYDQ
GLVRDVYV*

>g47402.t1.3.5bbdf93e
MEDEEWMMVQKNGNQFIVNGQPFYINGFNTYWLMVFAADQSTRGKVTEVFKQASSVGLTV
CRTWAFNDGQWRALQKSPSVYDEEVFKALDFVISEAKKFKIRLILSLVNNWEAYGGKSQY
VKWGKAAGLNLTSDDDFFSHPTLKGYYKAHVKMVLDRVNSLTNITYKDDPTIFAWELMNE
PRCESDSTGNKLQAWIEEMAVYVKSIDPKHLLEIGLEGFYGPSTPNRVQFNPNNYAQQVG
TDFIRNHQILGVDFASVHIYPDSWISQSISDAHIEFTKSWMQSHIDDAEKFLGMPVVFSE
FGVSVKDPGYNSTYRDTLMNTVYKTLLNSTRKGGSGGGSLFWQLFPEGTDYMDDGYAVVL
SKSPSTSDIIYVQSKRLKTFNSLCSWRCHWGCKKKHHVETFLYHDEL*

>g23807.t1
MSPPTMKGSIVLLLAYFCLGVCIAIDSIAVNQPVRDSQAIVSLGQTFKLGFFSPANSSNR
YVGIMFNIPVVTVIWVANRGKPLNDFSGTMTISEDGNLVVMNGQEKILWSSNVSGSKANS
SAQLLDTGNLVLKDNSNGRIMWESFQNPTDSFLRKMRLVINTSRLTSWRTPSDPFIGIFS
VGLESQTIPQFVIWNNGKPYWRSGPWTGNIFIGIPGMHSGYQDRFEIVYDSTGPAYFTYN
NLDDSTTNYFTLSSLGYLEEKILLDRKGDWTISWSSFNSQCDIYGKCGPFASCNPLSSPI
CTCLQGFEPRNKKEWDGGNWTSGCLRKALLQCERNKSAGQESKLDGYIKLRNMKVPDTPE
STTSSEEECGDECMNNCSCIAYAYYPGIGCMLWRGHLVDIQQFSSADGADLYIRVAYSEL
DKKRDMNVVITTTVIATSLFVALSLYFCRKWHQANPKGKKEEAELPLDEAREAYTRESMS
KNNVIEVKLEELPLYSYDTLATATNDFISTNMIGKGGFGPVYKGKLSDGQEIAVKRLSES
SGQGIEEFMNEVVVISKLQHRNLVRLLGCCVENEEKMLVYEYMQNKSLEVYLFDSSKSDL
LYWSKRVAIIEGICRGLLYLHRDSRLKIIHRDLKASNILLDEELNPKISDFGLARIFGGN
QDQANTIRVVGTYFVNAEDELSLLGYAWKWWNENKIVKFVYPAIFDTCTEMEFLRYVHVG
LLCVQEYAKDRPNVSTVLSMLNSEIVELPLPKLPAYAGRIGSSVHESSQHDICSVNDVTI
TAVESR*

>g12542.t1
MKSLSNDNDNSSSSTYKNWLGFSLSSQMSKMEGAAGHLQTLPCSNAVSSSVPLSFSHSLS
HFSYPGIYCGMESDNAAFYPHVTVMPLKSDGSLCMMEAMNRSQQQGMESSTPKLENFFGG
TTMGTHNYETGERGGMALSLDSMYYHQSLNHEPSSQDFLNNLQGNSRQQQRQQQIQLQQY
SEYSAFRGREFHQAPEEGTKETQLAETNPQLPIMADNDLSWMKNWVSRNYPADHSLEPKM
IGCMGENGGESGSISAMGYGDLQSLSLSMSPGSQSSCITGSQQISPTVTECVAIETKKRG
TEKVHQKQIVHRKSIDTFGQRTSQYRGVTRHRWTGRYEAHLWDNSCKKEGQSRKGRQVYL
GGYDMEERAARAYDLAALKYWGPSTHINFALENYQHELEEMKNMTRQEYVAHLRRKSSGF
SRGASMYRGVTSRHHQHGRWQARIGRVAGNKDLYLGTFSTQEEAAEAYDIAAIKFRGVNA
VTNFDISRYDVDRIMASSTLLAGELARRIKNLESSNDISIENPPNPDCNKELNNSKENHD
NTLDWNMGLHQFSQPLHKQGFLENIKTSSFPMAVNNLIGIETLGTAHQEVVGSGKLMTHF
SEPSSRVTSLSCSREGSPDKSSSLPTHFTMPPATSKLFTNQSSHTANSWITSTQLRPTVP
IFASWTDAS*

>g39680.t1
MSSSKALIRTGISLMTRFVKPSSIHHNSSTPPSSTQLIASANIAPKLFPSLSSHLHQNDA
ESLKKFSSSEGFLYPCGLPFLPFFLPDGNNSTSPEPLVLFPKRTYQPSNIRRKRNHGFLA
RKATKGGQRVIARRIAKGRSRITP*

>g61268.t1
MRRVNFGGLATICKAAEGVAAVSSATTYHQLAQVALYSRTSSSNNSNSYAKSRWFFGNYS
EMAQTSSFAVAGAVFFSVAASSLAGEVHAKEPLPPNVRPDDVVLYQYEACPFCNKVKAFL
DYYDIPYKIVEVNPISKTEIKWSDYKKVPILMVDGEQMVDSSAIIDKLSRGTRSKVPVKR
SSEADEEEKKWRGWVDNHLVHILSPNIYRNTSEALESFDYITSHGNFSFTERIAAKYAGA
AAMYFVSKKLKKKYNITDERASLYEAAETWVDALNGRDFLGGAKPNLADLAVFGVLRPIR
YLKSGKDMVEHTRIGDWYSRMETAVGQSSRIQA*

>g7237.t1
MGFALQLIVFFVCLTSGIVCQVTEFISIDCGGNKNYTDPSTGLVWTSDSGIIAHGKSVEV
KSTNGNSPHYSTKRQFPIDNKKYCYNLNTEERRRYIVRATFLYGSSVTEESYPKFQLFLD
ATKWSTVSVSETSRVYVKEMIIRAPSHSIDVCLCCATTGSPFISTLELRPLNLSMYMTDY
EDDFYLKLAARVNFGALSKDAIRYPDDPYDRIWDSDLEKRQNYLVGVAPGTERINTTKYI
NTNTREYPPVKVMQTAVVGTMERLSYRLNLEDFPANARAYAYFAEIQDLAENETRKFKIE
QPHTDYSNAVVNIAENANGSYTLYEPSYMNVTLDFVLSFSFVATKDSSRGPLLNAIEISR
YVQIVAKTDDKDVSTLAVIRSMSLASNLTDEQGDPCVPTPWEWVNCSDTVPPRITKIVLS
GKNVMGEIPSELNNMEGLTELWLDDNLFTGPIPDMSNLVNLKILHLENNKLTGPIPSYLG
SLPSLKELYVQNNSLSGEIPPSLLTGKQIFRYEGNAHLRQEEKNTRHHGLVLGVSVGVLA
TLFVLFIGSLLLLHYIRVKRSYHKFDDKGESLRTSAKPSTNYSITRGGSLMDEGVACYIP
LGEIEEATSKFSRKIGKGSFGPVYYGKLKDGKEVAVKIMADSSSHGTRQFVTEVALLSRI
HHRNLVPLIGYCEEENQRMLVYEFMHNGTLRDHINGSINENHLDWLARLRIAEDAAKGLE
YLHTGCNPTIIHRDVKTSNILLDNNMRAKVSDFGLSRQAEEDLTHISSVARGTVGYLDPE
YYANQQLTEKSDVYSFGVVLLELISGRKPVSFEEYGTEWSIVHWARSLIRKGDVISIIDP
TLVGMVKMESVWRIAEVAIQCVEQHSSSRPRMQEIILAIQDAIKIEKGTDKLSSAGSSKG
QSSRKTLLTSFLDIESPDLSKESLVPSAR*

>g44459.t1
MDQQQVYPLPQSYNTNNAAYNVKRDEESATMDSDELRRKKRMKYLAYFAAFVVFQTGIIL
LFSLTVMKIKTPKFRVRSANFESFEVETAANPSFNMRMDAELGVKNANFGNYKFQNTTVV
FFYGDAPVGQAVVSKSKAGWRSTKKFDVEVEISSNGIPNNSQLGNDINSGVLTLYSRSRL
NGKVELMFIFKKKKSTNMDCSITIDLADKAVREIKCK*

>g7379.t1.1.5bbdf938
MSEERCEVTIRIDRKLPRASDAHNKQQIFKVHRKLRSQNEEAYEPQMFSIGPYHRGKSHL
VEAEAYKLSYLSDHLIRKSGAGNHVGELSVGNYIQALREHEEEARSYYSDEDMIGQNGDE
FIEMLCVDGCFIVEFLRRLGATGSSDASVYSLHGDPIFQKDWVIQCLIRDLMLFENQLPF
FILDKLFKMTRLPRGGQEENLIELALSAFAHLFPGEEESLRYSAEDDDNIVHFLDLIHKK
RCSAFAKKVNDENAQDKGENARHTGALERITSASELRRKGIKFEKASPATSWLDITFQNG
IIKIPSLFVHDLTECVFRNLIAYEQYIPQSTDRKCVFDYVTFMDCLIDSSKDVEMLRHRQ
IISRWLGDDEGVSSLINKLGNDVTISYPKFCYLRVFKQVNEYSSRNWNVWRAYLMRNYFS
NPWSIISFLAALLLLLLAITQTVFSIADYAK*

>g21575.t1
MARDALHLLVTLLALSSLVALNAVPGSRSIHHLHESRQIQGLDHTYESRQIQGPDDINQL
KSAEVARDEIASRRMDFQLNDYPGPGANNRHTPAGD*

>g36403.t1
MEKPKSSFSKQEKKKAVIRLGKASGGGGGGVGVGIIFLGGAVVSATAAFLIRRRLRKSSS
TSNSKNCNHDRSTPASEIPYKFLEDRNNIQSKGLQFVARDSSPYADTDQNLSNGTAKIEV
RENDNTTISDQSFSLDQKYKVEANEGKGYPISDGEEIIHSNSPKGWVSSMQFDASPIKEE
KSALPFVENQTLRQLKNVADHLSGEEIEMIKEDNSIDTALVNQTEEENQQMLENIEGEET
QINCCPDEDNMKEMHCQEASETTDAEQRIITKLQFGEEQESPFHCGKESYLSKDERQETE
ESSLAFKTVQVIEKDDALDVTDAEQDNGDTDTMIQMTEVGSLCSESFGVINRNEKLEASH
EDLGKGNTSIVMLAEEETKCDHHDISLNIGANEETKGNETFKTTDEDVREDTVALMSEEG
QRKCLVGWLTTETADVMGEVEMLEEDEGSENEFVLVEEEKGAQHDKEISGEWSQANGEKA
QFSDNIASGSNQQKIQTEEPETSLNVDHEDMSVCCDELISENSSSKNCNATVTNMLLTGV
NIPAQLKPKIGIDNGFMEVQLSAEEENVNSEPTTEDRSVDSENPPMQLVERQHLNGHNEY
QPEEVEDTFQVIYAANVTIEEHNLMRPEEDNLDDEEDDDADEANIIERVEKSSEATGDSS
LESNSMPIWPAESLEKVSMEPKELKFNEQKGQMEEDQTVKTQVPMYLQNIGKDGIMENSI
QKGNDSKGNSKLTFVERVMLELAKHTHQPTNSQKLRVIIPALLVLSWSLCFWRFGLPILK
ISLIVILIKILSKIQGY*

>g69090.t1
MSTMKLFDAHCHLQDPRIFSMAPRIIKTALDNGVVHFAVNGVTESDWHLVKEMSDRHPSI
IPNFGIHPWFVAERTPNWLNTLKELFEATPAASVGEIGLDKGSRGRQIDFTDQVEVFRQQ
LQLAKELKRPASIHCVQAFGDLLDILKSEGPFPAGVLLHSYLGSADMVPEFAKLGAYFSF
SGFLMSMKESKAKKMLKSVPLERILLETDAPDALPKSSDSDSLLLIEREDNLNNVISDTG
DTSAFKDSGLSDNLSQEKSNKSTMQRETLNHPANIHHVLSYVASLLDMTREELAEISYRN
AINLFSYEGSKSYG*

>g38369.t1.1.5bbdf938
MRDANLDLFDPRTAVMDSSVYSPTSSCDPDFGFAFNDSNFSDRVLRIEVLANDSSDSYSG
NDAGCQSLADWARYRKRPREDVVKQNDMCHSFAALDITVCPEEQVLSCDPPDSDDVVQGE
NQDEEEFAMIEESPSGDEAANSDDLNCDLDSSRILRVRTLHISSPILAAKSPFFYKLFSN
GMRESEQRHVTLRINASEEAALMELLNFMYSNSLNTTTAPALLDVLMAADKFEVASCMRY
CGRLLRNLSMTPESALLYLELPSSVLMAEAVQPLTDAAKQFLAARYKDITKFQDEVMSLP
LAGVEAILASDDLQVASEDAVYDFVLKWARVHYPKLEERQEIIGSRLSRYIRFPYMTCRK
LRKVLNCNDFEHELASKFVLDALFFKAEAPHRQRIQAAEDSTSSNRRYVERAYKYRPVKI
VEFELPRQQCVVYLDLKREECANLFPSGRVYSQAFHLGGQGFFLSAHCNMDQQSSFHCFG
LFLGMQEKGSVTFAVDYEFSARLKPTEEFISKYKGNYTFTGGKAVGYRNLFGVPWTSFMA
EDSLFFINGILHLRAELTMRQ*

>g47587.t1
MTSSESNSEQELTPKIPVWDLPDVPKGTLPPHVQLQRTRVVCNKEAPTHTENVQYSGAYA
SMGVDNSLRLDEFRKNFRVEVVRLTEDDMEFDLVGVDASLANAFRRILIAELPTMAIEKV
LIANNTSVIQDEVLAHRLGLIPLQVDPRLFEFISENDIPNEKNTIVFKLHAQCEKGGSRC
TVKSDELKWLPNGSEFLLATENLASNSASKQKTYTSFSCSQDSLPEFSNNPIAPKYPDII
LAKLGPGQEIELEAHAVKGMGKTHAKWSPVATAWYRMLPEVVLLQEVDGDKAEELVKKCP
VKVFDIEDIGKGMKRATVARPRDCTLCRECIRGDEWEKFVALRRVKDHFIFTIESTGALP
PEVLFTEAVKILEDKCERVITELS*

>g44663.t1
MGSKTVLFLCLLAVFLMVVSEVSARDLAETNAEQKTNGLEESKYPGGGYGGYPGGGYGGG
GYGGRGGYGGRGGYGGGRGGYGGGGRCHYGCCGRGYYGCRCCTYAGQAVDADFESEPQN*

>g4846.t1.1.5bbdf937
MFRVGESKMVAKHQFTRMDTLALKDLICRKIGHQRAEKYFSQLRSLFSLQLSKIEFDNAC
IRTIGRENISLHNRLIRSIMMNACLAKVSPPKVKKVDGGLSIKVANGYQRSCLQSLYGDA
FAQSPRKSRSPVHRDRKFRDRPSPLGPLGKSPSATCEEGALRVQEQQSATELFSLGSRPP
VEVASVEEGEEVEQIAGSPSIQSRSPVTAPFGISTNVGGARKTLRIGSVSADYISCKTFQ
SSGELPDTRSLRSLLEKRFELEGVGISLDCANLLNNGLDVFLKRLIEPCIGIAKTRCPKE
RVRHSNGLVVPGYNGVLSAVYSQRPLKEFCASMLDFRVAMESNPRILGEDWPLQLEKIST
CAFDY*

>g34032.t1.1.5bbdf934
MATEKSGDLSLPRQHSPEPEPSTAVEFTGTRGSVFHTILALVVWLGSVHFNVLVVLASFI
FLPFSKALAVIGLLVIFMVLPIDERSKWGRKLSRYICKHVCGYFPVCLYVEDYKAFDPNQ
AYVFGYEPHSVWPIGVVALADLTGFMPLPKIKVLASTAVFYTPFLRHIWTWLGLAPATRK
NFLSLLASGYSCIIVPGGVQEAFYMEHGSEIAFIKKRRGFVRIAMESGKPLVPVFCLGQS
EVYRWWKPSGKLFLEFSRAIKFTPIVFGGVLGSPIPLRRPMHVVVGRPIIVKKKPQPTME
EVEEIHAEFVEALRDLFERHKARVGYANLQLQIL*

>g16182.t1
MAVTDFFAGEIATELLKQLIAICRKSSLCRSSAEELINSIQELIPIIQEIKYSGVELPAP
RQRQLDLLSEKLRDGQELAAKVLNSPRWNVYKNLQLARKMEKLEKTIRRFVKGPMQAHVL
ADVHHVRFDMAERFDRIEGSTRRLEQRLGAMKIGVDHQSGWIGEAVNRRMEVEEEKWVGG
DGGLTNLGAGMELGKRKLKEMLIKREDLSVVGIYGIGGSGKTTLAREICRDDQVRSYFSD
RIFFLTVSQSPNVEQLRSKIWEMISGNVIDGFGSMVPQWRLQYDGKVAAQKLLVLDDVWS
LAVLEQLMFRIPGCKILVVSRFKFPSVINCTYELELLGEDEAMSLFCHYAFGHNFIPLGI
NKNLVKQVIDKCRGLPLALKVIGASLRDQPEIFWRSAKNRLSRSQPICESHEVQLLERMK
LSIDCLPEKVRECFLDLGSFPEDKKIPLEIVINMWVELHDIDEEEAFAILVELSNKNLLT
LVKDARSGDVYSTYYEISVSQHDVLRDLAIYLSSLEDSKRRRRLLMPRREEGLPKEWERN
VDEPFNAQIISVYTGKMGEMDWFQMDFPKAEVLILNFSSSEYFLPPFMCNMPKLRALILI
NYGTSNSVLHNISVFSNLSNLRSLWLEKVSVPQLPDRMIPLENLRKLSIVLCDINNKLDQ
SLVDLPHLFPRLLEFTMDHCINFSELPPSICGMHSLRSLSVTNCDTLEKLPEDLGKLSSL
QILRIFACPKLEGLPPGIGHLIWLKYLDISQCINLECLPDEIGGCRSLEKIDMRECPQIR
NLPMSVASLQSLQRVICDEEVSWLWKDLEKIVTGLCIQVAEECFNLDWLAE*

>g70847.t1
MSEQQTTTPKLSREDAYKFLNLIPNPDGTVTRINQLPTSPPSPEIPPIESNAIPPLSLSK
DIPLNPKTNNFIRLFRPVNPTPNTRLPIIIYFHGGGFVLFSATSIIFHESCSKTAAYVPA
LVASVEYRLAPEHRLPAAYDDAMDAIRWVKDQASGRACDPWLQDLADFSKVFLMGSSAGG
NIVYHAALRALDVDLNPMQIVGLILNEPFFGGSQWSESELRLPNDKIVPLHATDLMWSLA
LPEDADRDHEYCNVVATSGSQKEKIGRLQRCLVRGYGGDPLVDRQKELVKVLESGGVEVV
AMFSEDGYHGVEIFDPKMAQILYDDVKNFVNFSSSAAENNPRQSAM*

>g43636.t1
MDRAYFAFHVALHFVTTSLALSVANNNTNDLNALLVFKAAIHDPHNILPVNWSTSTSVCN
WIGIICNSRHQRVAAIDLPNMDLIGTIPPNLGNLSFLVHFSIINNSFHGVLPKELAQLRR
LKYIDIEGNGFVGEFPSWLTALTGLRYLSFRHNKFSGSLLGGFFNSTKLEVIKLGYNLLT
GNIPQEFSALPKLQFLNIDNNQLSGPLPRALFNLSSLQQFSCINNSLSGNLPAHICNYLP
QLQGLYLSGNYFQGEIPSGIGECSSVRFLDLSYNKFSGNIPQAIWNLTTLRGMYLGGNNV
TAMSNQSLNLKLKTEYQIRGARLKVSHAFL*

>g30719.t1.1.5bbdf938
MDFDEYDYLDRTAENPGTKTGTHQVDKSGDQDQSKRPKHRTEENDNVDHRSKRSRTGDES
HGDEKERSSSSRHCSSLRDRERSERERRRSNQESKDSYKDRSRAEGGKKERDRDKIKERD
REMNMDKDSKRREHGREDEKQRGREREQEKSNRRSHSGRHLGDGEREGSRDREKDRDMEY
EGRERESQLQERDQESRRSKEKKEEVAEPEADPERDQRTVFAYQISLRADERDVYEFFSR
AGKVRDVRLIMDRISRRSKGVGYVEFYDAISVPMAIALSGQPLLGQPVMVKSSEAEKNLV
QSTVSVAAGDTGFIGPYSGGGRRLYVGNLHSNIKEDQLRQVFEPFGIVELVRLPFDLETG
RGKGYGFVQFSRLEDARAALNLDGQLDIAGQVMKVSAVTDQTGGQEASANAGDLDDDKGS
GLPLNAQSRILLMQKLDRTGTTSSGAVSLGSQVVNDPGLSATAAPVLGAAPGVSPIVIPF
GQIPVPALAGFPTAGLSLPAVTVPSINTIGIPSECLLLKNMFDPKLEVSAGDIV*

>g58830.t1.1.5bbdf940
MEPLKNSQWVNNLRSAHRSMHVFKTSYKRVKNSYFTHETHDFMVHTCDARESRLQDCILL
NKTSILLSETDVRQGLAAINFVDTLRIIVFTDSGATARVKMVSSTCQVRKLRTCRTTKQQ
QICSKQLIQESQAFISALYCATKW*

>g58141.t1.1.5bbdf933
MHALGRFCTDEGTVDEEVLEKLFKKIDENGDGYLSYSELRALIVGIRFEDINLNENDALE
KVMNDFDTSQDSQISFPEFINGVSRWLDEAKGSRTSQAGHGTMKYLTDFHEQTKRENYFL
GEQSDETVEGVDSPRRTSIKAVLLLLLGTVIAAVFADPLVDAVDNFSSATSIPSFFISFI
ALPLATNSSEAVSAIIFASRKKLRSASLTFSEVCFSFCCFLISTLVLCEGASLARVPTHP
FSPPLKK*

>g43405.t1
MEELNHFSHEDHPLILSQVQKEVICYGCQEQILESEASYSCLQCDFFLHKRCAELPRQIS
HPMHPQLRCIHSIHSSVLATRLILLTLVSTHPAFIGSLLILVADVRATLVVVLGNFLHTI
VRCVILISMYPVPF*

>g42681.t1
MADSSSSPPPLSHSPASFWTQANALLRKNLIFQKRNIRSNVLLVLFPFFVCMFLLIIQVV
VNTELDKPSQKCGCTCIDTNGDGKCEKVCGIEYSTVDQVETCPIPTPPEWPPLLQIPAPV
YRAVKTDFISYADLPNESCKTTGSCPAIILLTGSNRTLGQSLGASMFSSSSTLSASDILY
SLANNVSGSASKPQFTNFLEPAFFSGLPVYYLQPQCASSSAFSVSFPIGSASSKQDINCV
QGLHLWRNSSSEINDELYKGYRKGNPQGKINEIIAGYDFLNTDATNFNVSIWYNSTYKNE
TGFDSLSLTRVPRSVNLASNAYLQFLLGPNTKMLFEFVKEMPKPGTERRLDWSSVLAQLF
FTWVVALLFPVVLSSLVYEKQQRLRIMMKMHGLGDGPYWMISYAYFLLLSSVYMLVFIIF
GSVIGLKFFKINDYGIQFVFYLVYINLQVSLAFLVAALFSNVKTATGVVSASRYHLIYNY
KHTKILTNSCAGNCYSSRVHIGPWIWSLGCLSFPVLSSGFVISE*

>g55990.t1.1.5bbdf938
MEDVITDIPLPSRFFLEDLNIFTPPSPPLPSPFLLFSTSINRKPLRPSLLIIAISFPSLH
FFHHLSSKKLIGTMILPEIPFSGNPIEPSLRDKSCDMYAVNDADDSIIVISVQYPVTAER
SHAVAKLLIGEQIIPERVLILESVQSRNFRGQLSKDDAFAFKLETSLERNGTSDSPLITS
LDYFPSGSMVDGLAAALLAQCELKKIRGTLCLSWPEFGVSSKLLVKSVLLKVLPGVDLAN
IGNDEDSFSRITRDKELLDSELYT*

>g26778.t1
MAKARSVLKEAIGQKKMIEESDISRLPYLQAIVKETFRLHSTVPLLVRQAELDVEINGYI
VPKNAQILVNVWAMGRALNIWKKNLSRTTSGLSDGASNGGCFDSRL*

>g68143.t1
MTVKRSREDREVEALAMANCLMLLSNMVKSTTSPTSDRVFACKTCNKQFPSFQALGGHRA
SHKRPRLMVTVDDQIPSPAKPKTHECSICGLEFPLGQALGGHMRRHRNERTAGDKSEDTQ
SGSQKSNSHSDTHVALLLDLNLTPHENDLKFGPLDCFI*

>g16573.t1
MSQRFQAAALVASPCYPNAVVWSDENLIAVASGHLVTILNPAAPFGPRGLITLPASKPFP
IGVIDRQDILSPCVLPTSLSRDVRPCVRSISWSPIGFAPNAGCLLAVCSTDGRVKLYRMP
YCEFSAEWIEVADISEMLYTYLVSVNFEESDILSSGIAEEQTNETRTDQSCADSQPIYVS
KALTVVENKPGNLKSNNVRDIVAVADSRGKHMKKGSEDCNLPLITAEQFTARNSMLASLV
VAWSPNLVLSAGVEEVSADYVPNNCSVLAVGGKSGRISLWKIYQPQCYTSTNFRESISAS
LIGLLHAHDSWITALSWELLVSEASNPQLLLATGSSNGSVKVWQAYVNELLKSSEVRDVP
LSLLKEVLISDSGIVSVISLAVPIESPGKTLLAIGRGSGSLEVWVGDLHSCNFEKAGCPN
AHEHIVTGLAWGFGAKCLYSCSQDDVIRSWVLHDTILHKVPLPSNTTGVRSPSDVPNVYD
LCFGMALSPGNLAVAVAHSFDADLLNPMYEARTQKAAIEFLWIGGQQLDLTLNMHSDFEF
EPFSGLPERELVSWENNILWSFSKYERTNQPLVIWDVVAALLAFRQSIPNYVDYVLLKWM
RTLFGSEFDVSPAFSSKISKLLSNILSTQLHILNIIIRRVFLERLNAAQVNCKQQDFEGL
DGAVVQQNFWLKLIHGSEKELRERLVYFSFLAILKIGSNFTSDFSKARCWTVIGLGQMVQ
WVASNPNGLNYHVKLLAEEIGKFEKSGRLHSLCDYVVEERCSFCSASVPFESTDIAFCQG
EKSDDGVGQSHKLTRCAVSMMVCPITPTWFCICCRRYAFSLAPPYLSPLPRYSTDLEHVS
ESSIPEVSRKPLCPFCGILLQRQQPEFLLSPSPM*

>g34657.t1.3.5bbdf937
MAFAHYLLAAAAAPVESSNSNLRNSILTPPLPSTVSNSLLSFSFSSLEPNLKASNLSFFS
RLGRIGQTVKANPVEAEVPAVNSFSQFKHLLLPITDRNPYLSEGTREAAATTASLAKKYG
AEITVVVIDEKEKEAFPEHETQLSSIRWHLSEGGFQEFKLLERLGEGKQPTAIIGEVADD
MNLDLVVMSMEAIHSKHVDANLLAEFIPCPVLLLPL*

>g34057.t1.1.5bbdf935
MAAEKSQNEKLPTATASSQAMSSCRKKKNEDATFLEDFKDHIDKFIHASTDEHKTCFQKT
IKKMFGMSKVVAERNTETTEVESSLPLRTSLSE*

>g52775.t2
MNQLMAAENPNCTVYVGNLDERVSDRVLYDILIQAGRVVDLYIPRDKETDKPKGFAFAQY
ETEQIADYAVKLFSGLVTLYRRILKFAEGFVDIRLTSVLEEISGQDRPSTNSPVASSSHK
PRPPHPVAHNDMGASSNSTRLSTSCRFQEHQVNYSQGNEHIQDIIALLPF*

>g37468.t1
MPVSYTEPCMETKAEWAWLPELLLDSIVKKLILPVDYLRFGAVCKRWRSVAIEHNVYKIC
FSKVPMLLVPTKDSSEERRSLFDVTQGKNCGVELPIPFNRRCCGSSHGWLAFAMENLVIT
LFNPFLGKQIDLPPLLNMKKADYNARYFVRKVVLSADPFKNPDDYEVVAIYGDMEQLAFI
KGGQDSWAKIPVDKIVKTNFVASDVIYHQGIIYAVNYHNEIMPGRVVSINTTTKAIITVA
QWKENSYREVGLFQARAYLVESFRGELLVVNRLLSLQYIRKISKRKKVGSTTRLKVMKLV
KYEQKSKLVPEEVNDLGNDALFLGDNQSMSILASECPGCWPNSIYFTDDYVEFFYAYGPR
DMAIYNLKDESFESHYVPSRLHKRLPPPLWITTKSKHRNLAEQT*

>g24231.t1
MRKAFWSLETWKPVSHALVVMHLSIKKYDLLQFDGTPLEGQCSWPTSLQVAQIALVEGLN
LLHVGPTDYIHPPCGGIPHCFPQFGPGTLQQHGFARNMNWSIINSENVEGNPIITLELKD
GPYSHSMWDHAFKVLYKVTLDKKTLSTELRVTNTDQKPFSFTTALHTYFSASVTGASVKG
LKGCKTLNKVPDPKNPIEGKEERDIVTFPGFVDCIYLDAPNELQLDNGLGDIISIKNINW
TDAVLWNPYLTMEASYKDFVCVENAKIGQVQLEPEQSWSAVQHLSVA*

>g61774.t1.1.5bbdf93a
MCDREFICRVKDDETVAAVQAIPSPTQPTILKNFTPVLYVYVPPAFVDFFFPSNFHHLFF
LFRDLFSLLKATNAVFGSCTVFSEVNFVNQASDSSFLYLFSFVGLEFYSSGTTYKECEIG
NSNPVYYCGIETKVFLCLVEKHFGHISPKNSKWLQENLTDMDTKVKSMIKLIEEDADSFA
RRAEMYYKKRPELMKLVEEFYRAYRALAERYDHATGVIRHAHRTMAEAFPNQVPLMVDDS
PAHSASGPDPQTPEMSTPVRAFFESDELQNESPGLSALHASGAKRNGTLTEDGRVRKGLQ
FHEAVEKENNILSSDSQSHQKLSLSESDQLGESEEILSLKKALAKVEAEKEAGLMQYQQS
LEKLSMLESEIARAHEDSKGLGEQARQAESQAQTLKEALANLEAEKEANILQYRQCLDRI
SNLENTISRAQKDAEELNQRASKGETEAQLLKDELAKVSAEKDAALDQYMSSLEMISNLE
HRLRCTEEDAKKLKERAEKAENEVETLKQGVSRLTQEKEAAEVQYHQCLETISSLECSLS
STQEEAKRLNAEIENGIANLKGAEERCLLLERSNQSLHSEVEALMLKTGSQSQELMEKQK
ELGRLWTCIQEERMRFVEAETAFQTLQHLHAQAQEELRALSSELQNKVQNLRETETHNQM
LHEEVLKVKEEKKGLNELSVSSAITIKDLQNEVSSLTETRGKLEEEVELRLDQRNALQQE
IYCLKEELNKFNKKHSTIMEQVHAVGLSAESFGTAVKELQDENSNLKDTCLRERSEKLDL
LEKLEILEQLREKNSILENSIADLNAELEVVRGKIRTLEKSCQSLLDQKSSLLDDKASLQ
AQLQVANQNLENLSEKNNVLETSLSDALDELQGLKTKSRSLEESCQLLVDEKAGVVTENG
VLTSQLESTKVRLDSLEKRYAELGERYSALEKEKESSVCKIQELQISLDVQKQEHASFAH
MKETQLACMESEMHLLQEEIKSTKREFDKELDNSLQSQTEVFILRRIARDLEEKNFCLSV
KNQELFEMATLLEKMLSELKQDNFGQKAEIVSLSDQGRTLRKGIIQLLKALGIGPIHDSE
YKSEKDQAYLNDILSKLEDTKIALCKTEEENLRRSIELSVLIAMLGQQRIDAENLELEKC
VTDQELRIRNEQLFALRSEILKLHEMNEQLRSKLIEGDQKENALIAQVSDLQNKLFDLQG
LYHDLQRENLKIHEEKGSLTKEFLLLEENNRSLEGEYSVICSEMLSLGYLSSFFRNCVDE
KSLEIRALAEDLDKLNGINDDIMKRLNLTERKLEEVLYQKEMELQQLREEHDKTKVREET
LHSELQMARDDIEMWEAHASDFFAELQVSKLFQILYEEKFHQLTEECETFKNESTAKDTD
IKLLRERANSLDSQNEDLNTRLTAYGLAITSLSEYISSLEERTCLHGHLEIPENVKLKDA
EVLNHVHENRTNDNKEVVADPFSDLQNLQCRIQSIEKAVTQREQLLMQENHSAQSELEAA
MRQIAELKSESNQHRRNSKPTSETSEVDNGLLTKDIMLDQISEFSPYRISKREQVDADIQ
NIESWETVDQDGSIDLTVGKSNKMMNPSTEKITNFHRVKSAKKQKNELPVSDLLVEKELG
VDKLELSKRSTEPLQEGNKRKVLERLNSDVQKLTNLQITVQDLKRKLXXXKSKSRFCCYT
FGKCTSS*

>g20347.t1
MAASGRINRSSWGRRVGNVRSVVGRINWAPWAVAGTLAYFLWIKPSQQLNQQQKERATTA
ASDPYRYVEKRKPIPDPQVTGLVYGNKNTSNKSPE*

>g12015.t1
MSRKLEALAQQLMAMGFSQERATMALILNEGRVEESVAWLFEGGEEADKHKEHNLDSGSN
LKIDISEELARIADMEIRYRCSKQEVERAIVSCEGDIDKAEENLRTQKQDPPSVSPKPEE
TGDPPTGGSNKLPVAASQNTSRVQPKPSPAITTQQKRDEKDFNYTKAAVPAGSSMDLGSK
NLQSLKRIQPKMEWAKPQQIGVPAEKRWPVAGSSPVSYSLASSLQASPPPVKTETRYVGS
ELKNLQIGSVREPVIVMQRPQSINSKQTPSTSVTSSSPGTAVGWYPNSVETLKPNGMMPP
VSGARSPSPNSVSTNQLYNQFQYQPQQQFVSSSGAMESSGTSRGNGLWSRTVASPTLAPA
SNLGLFSGLGTNGSSGSSSPVDWNTGGSMMQLDYTSIDWSLDRGSSMSRPSGLWPGVNSF
MQNETARTYDSFSSGMVVKSAMRPVLSNGSSVPVAGFQDGVGSTETSASVSRDWTSPFEE
KDLFSLPRQFVSSPSL*

>g65643.t1
MKLRLRSPRVVQDSSLAGEAEVDEGLRQSCWAKMPSELLREVLMKIEESESKWPLRKNVV
ACAGVCRSWREIMKELVKIPQVSGKITFPISVKQPGPRDSLLQCFIKRKRNQSSQTYHLY
LSLSQALADDGKFLLAARRFRRPTYTDYIISLRTDDMSKGSRTYLGKLRSNFLGTKFVVY
DAVPPHASNRMAKSPSTRFVGIKQLSPRIPAGNYPVAHISYEVNMLGTRNRGPRRMHCVM
DPIPASSIKPGGVAPLQIDFPLSNADYFPLFRSKSSQFEESQSGALDDQKEESLVLRNKA
PRWHQQLHCWCLNFHGRVTVASVKNFQLVASPENGQPGPEHEKVVLQFGKVGKDVFTMDY
RYPISAFQAFAICLSSFDTKIACE*

>g36866.t1
MAIRRLLTLARRSQRITNKHLHPFSTSAAVAPASPSSTPSNFSPPPTTAMIYDRLAENVK
DKLKQLEQPDSRFLKHASPYPTRVDHTPILAAPLTRVTTLPNGLRIATESNLACSTATVG
VWIDAGSRFESDETNGTAHFLEHMIFKGTERRTSRELEEEIENMGGHLNAYTSREQTTYY
AKVLEKDVPKAMDILADILQNSKFEESKITRERDVILREMQEVEGQTEEVIFDHLHATAF
QHTSLARTILGPADNIKTITKQHLKDYISTHYSAPRTVIAASGAVKHEEIVELVKKLFTK
LSPTGISTSQLIAKDPAIFTGSEVRMIDDDIPLAQFAVAFEGAPWTDPDSIALMVMQSML
GSWSKSAGGGKHMGSNLAQRVGINEIAESMMAFNCNYKDSGMFGVYAVAKPDCLDDLAYA
IMYEISKLAYRVSEDDVIRAQNQLKSSLLLHLDGTSPVAEDIGRQLLTYGRRIPYPELFA
RIDAVDANTIKRVASRFISDKDVAISALGPIQGLPDYNWFRRRTYWLRY*

>g50336.t1
MAIETLNRISASIHGKLSGLSNTSTEQCIFKVHDGLRNHKKEAYEPQVLSIGPYHRGKCN
LKNMETYKLRYLQQLLRKKGENADGYIFALMELEGRARSTYAEEISLSEADFVEMLCIDG
IFIIEFFRKRCMRRLRNRDDKIFKMQWLRSSIVRDLMLFENQIPFFVLAKLFDMTMLGDE
EHGLIYLALSVCAAPFDIDPSGICTSISPNEITHLLDLRRKSLCSSFDAILEEIRDSQND
DDLQHKSWCSSFDAMLQKITGFEKKSPKNKFSPELKSASQLQQSGIKFERATQQASWLHI
TFENGKIKIPHLTVKDDTESIFRNLIAFEQYMTDSRSRKFVTDYVSFLDDLINSPRDVEI
LCHYGILTNWLGDDEVVATMFNKLVRDVIFDSDKFCYSKVYEDLNKHAKKRWNIRKAHLM
RNYFNTPWSVISFLAAVVLLILTAVQTIFSILAVTKGK*

>g58770.t1.1.5bbe19fb
MAIRIIPKKIQSIWEVWNLRGAVLVSLFCQILLICCASMRKRRASYYIQIVVWSAYLLAD
WVAAVAVGLISSTQGEKCEKVTVNDNLAAFWAPFLLLHLGGPDTITAFSLEDNELWIRHM
LGLVVELLAVAYVFSQSFPNDFWLPTVLVFLAGSIKYAERTRALYRACLGNFKDSMHPKP
DPGPNYVKLMEEYTSMQAAHLPSTILRLPEPKQLARAFDVGAPSKDAQHYSSQIGIIQDG
YKFFSIFKGLVVNHLLSLRDRKNSRMLFLSLNSQEAFCVMEVELNFLFDALFTKMAAVHN
EVFRLGYIFRFTCTASIVAAFVLFIVHDKRNIHRFDIAVTQALLIGAIFLDLIALTKLIF
SDWTIALLGHQKKFSLSTVLNHRMVAPVFLTIRRRISFGSRWSKNVYQHSLISYCLKKQN
GILDDIANFFGFKEILEEVLYKRETEIKDELFEFIFKELKDKAEEANETEVAKEICSSRG
EWTLLYQVGIDHSIPKSIMSSVSEDVDYDQIVLTWHIATDLCYFTSKDVVDKNRERCKLL
SDYLLYLLIMRPTMMSSVAGIAQIRFQDTCAEAERFFSLSRSELEDEEAACKKILAVNTV
AKPVEIKGEGSKSALFDGCILAKELKNMGDHRWEVMSKVWLELLCYGACNSEGFAHAQQL
SKGGELVTFVWLLMAHLGLGRQFRAEAGRLRANLIVGK*

>g51609.t1
MPKRRIVKALSTLCIAFSQIELHTSCQSLKEKLKRVNDEHLQKENEYRTAMEMLKQDHST
RLEELETQIRGYQIQNVENEATINQLHLDLAVHKNHVEFLTRRLEKAPSDWKSGNYYDIE
GLKDYVLVEQEERDELTKKLQNLEKELLISRTKLAEHCQDLTLNQHVERLKQKIMKLRKE
NEVLKRQLLKSKED*

>g69117.t1
MESSNHLSDSKISTYIGRQTSSHGLALPQISLSNSEPSLVGLKGNEESTEVSGHQPPRWA
SDFFIEEQPFWLDDLLNEPDTQVQRGHRRSASDTFAYLGEAIEDLDIRKDTVNQNFTCKS
SSIRQNIGHYKELDKGKFEINSSLQDEKYWKDLNVAVSRSVENHEKVEVSSQNVEGSIEG
TSSSPPKPSKTDTKRAKQQSAHRSRVRKLQYISQLERTVQLLQAEGSEISAELEFLDHQN
LILSMENKALKQRLDSLSQEQLIKQMEQEMLERELGRLQNLYQLQRQQQIQLQQQQQHHN
KHRKNKSKDLDSQLASISRKNVRGTN*

>g6465.t1.2.5bbdf93d
MYGHRQKHNMGCFERESPALKEILLKLYRAKNPMTVDHHLHEFGSVEYHVQASVSGPDDT
YLSISTPLLYQDSMLSSWLPRYTLEMVKKICPDVIEIIEPPKEGYQLTLRLNYSRIPRNK
DAVKKIANISSVQGVILSSQLKDMLRNVNSLEVSQGMYRPVKLIYHPREPFFVIKQPEKI
TAVFPMRFKEDTDVIIATAFFQEIMDIGSSKAFAKAPHCIWSPIPPPELRGEPIEDLSTN
GGFVSFDITARHVEGKRLDKTVWNLLNFYAFVKYHVKVRLYS*

>g73121.t1.1.5bbdf936
MEAEENEPTSQKPKRVRRQENRMGAVMLTVQKKNSLAMNFYMTKLGYIISAISPSRVYPL
TGLETNYEILCKAFDYKAKSVFEDLAAE*

>g16906.t1
MQRTLKSASFLLRRRYDTGNNNGGFVSQYKRSLTSLSNNSLVDDQENFVLVEANGASRTA
ILNRPSVLNALNTSIVSTPLIKIAPLSCF*

>g30223.t1
MRTPSSLDTSSPATTTTTTKPTFSTPAIVQKSPWHSPLPYLFGGLAAMLGLIAFALLLLA
CSYWRLSGNLNNEESAAERDVEQGGDEKSDNPAAAKAVPVFEEKIVVIMAGDVKPTFLAT
PMSSRASSFGDGIKKNENFGKETEEIAEKPKHEASGDQIVRSTVERNQSQEAVQESPEQN
QP*

>g76999.t1
MHYEEWVITIVATDLVSSAQLQQSPGYSELTIALKDFMWNLKAARKNLICLLGNIPFSKG
LVSLHGHWIMSARTAAAEISLQTCLSSSGSC*

>g59715.t1
MARTNKYSSVNFNDIYGKKVINSTNNNNNSSSSSSSASSFSSPNKTIISNSRIHGHMLVL
SKPATPKQKPITIPQNPSEKTPSLPKPTQISDQTGSDPDTISLRPQGRTGSGSPVVLSPL
PSPGKPSSPLLKSDRFVPPHLRPGFAGREEKLSGPEFLKGGQGGGRGGGQFGPPNRNGED
GRPKSGGGYERMRRTEPMDFTIRPGSSGGRPSSSG*

>g53192.t1
MAILTLVVSSCFIALLVCALKSLNSLWLRPKQLEKCLRAQGLSGNSYRPVYGDFKEMVSM
IEDANSKPINLSDDIVPRITPLVTKTIKKYGSNSFVWLGPYPAVIILDPEVVREILLKYN
LFQKPLYHQLGKFLIQGLIFCEGKKWAKHRNIINPAFHLEKLKHMLPAFHLCASEMLSKW
EGSISLEGSCELDVWPYLQTMTSDAISRTAFGGNYEEGRKIFELQKEQAGHVMTAVKSFY
FPGSRFLPTKRNRRIMEIYKEIQATVRGVIDKRVEAMKAGEPRNEDLLSILLESNLKEIE
QQGNKNFGMSINDVIEECKLFYFAGQETTSSLLVWTLVLLSTHQDWQSRAREEVLHVFGR
EEPNFDGLNQLKIVTMILNEVLRLYTPLVTIERKVQEETKIGKISLPEGVLLIMPVILLH
YDPKIWGDDAKEFKPERFSEGVLKATKGQVSFFPFGWGPRICIGQNFSMIEAKLAMAMIL
QRYSFELSPSYTHAPYTVVTIKPQHGAHLILHKL*

>g28331.t1
MALGMENRALAVFLLVLSASLQVSIGAVYKVGDSAGWTTIGNVDYKQWAATKTFVVGDII
LFEYNPQFHNVMQVTHADYRGCNASSPIATHTTGNDSITITTHGHHLFLCGVPGHCQSGQ
RVDINVIHTSVAPTPSPTPSSPAVTTPAPAPNAVAPLYVSHRLLGNLGTAVAVVAALLCG
FI*

>g29225.t1
MTTHDLVFANRAENLGAKILFFNSSDIALAPYGDFWKQIRKICTQELLGDKRVQSFSSIR
EDEGLNLVKSIKVLSIAGKLVNLKQELTSYTSSMLCRAAFGKVSKDDHKAFSDILKATLP
LASNFEIADVFPSFKILHPVFSSKTKMLKANN*

>g48438.t1
MGISFPSEIGLLVQLRYLAVSGYVRDVPPSIVNLWKLETLIVEGFRVKVILPYTIWRMSS
LRHLHVNKYVTFNLQDEKVGNSFQLENLVSFSAPALSDGEETEKILKRLPNLCKLKCMFL
ESWDSFKNCNQFPVLNFLIHLESLKVFYFGKSLNPSELILPLNLKKLTLSHFHLPRSHIS
AIGRLPSLEVLKLDSGAFEGRRWDMRDEEFQELKFLKLDTMNIAEWNASCDHLPNLERLV
LQNCKDLREIPFDFSGISTLETIEVHWREQSAELSAKEIAEANGEIKVLISHL*

>g37918.t1.1.5bbdf935
MEDFWSMFCGASDCAACINHALIICFDVLLLVVLLVIMFSRPSSKFSQIHLQTTGISRLQ
LFSAIFNGLVGLLYLCMGIWVLVRELGRTHSALSLHWWLLLIIHGLTWLLVGLTVSLRGK
VFSRAPLRLVSILAFLFSGIACGFSLVTAIIGKEVSFRIALYVLSFVGSCLLLLCTYKGY
KFEDSTENDLCAPLNGVANGNGKLDSVGYVTPFEKAGFFNKMYFCWLNPLMKKGKEKSLE
DEDIPKLRDEDRAESCYLMFLDLLNRQKQVDPLVNPSVLNTILLCHWKEIFTSGFFALLK
IITVSAGPLLLNAFIEVAEGKKSFDYEGYVLAVLLFFSKNLESLSQRQWYFRSRLIGVKV
RSLLTAAIYKKQLRLSNAAKLMHSSGEIMNYVTVDAYRIGEFPFWFHQTWTTSLQLCFAL
FILYRAVGLATIASLVVIVLTVLCNTPLAKLQHKFQSKLMVAQDDRLKAISEALVNMKVL
KLYAWEIHFKKVIENLRQVEEKWLSAVQLRKAYNSFLFWSSPVLVSAATFGACYFLGIPL
YAGNVFTFVATLRLVQDPVRSIPDVIGVVIQAKVSFKRIVKFLEAPELDVANVRQKHLRE
NASQNIVLRSACLSWEENTIKPTLRNINLEVRPGEKFAICGEVGSGKSTLLAAILGEAPI
THGTVTVHGTIAYVSQSAWIQTGSIRDNILFGAPMDSHRYQETLEKCSLLKDFELLPYGD
LTEIGERGVNLSGGQKQRIQLARALYQNADIYLLDDPFSAVDAHTATSLFNDYVMGALAG
KTVLLVTHQVDFLPAFDCVLFMSDGEILSAAPYHQLLASSKEFQSLVDAHKETAGSERLS
EVSSSQSQKAAAKEIRKTYSEKSFKASGGEQLIKQEEKEVGDTGFRPYIQYLSQNKGFLF
FSLAALSHLTFVIGQISQNSWMAANVDNSEVSTLKLITVYLVIGVVSTFFLLSRSLSTVV
LGLQASKSLFLQLLNSLFRAPMSFYDSTPLGRILSRVSADLSIVDLDVPFNLIFAVGATT
NFYSNLIVLTVVTWQILVVSIPLVYLAIRLQKYYFASAKELMRINGTTKSFVANHLAESL
AGAMTIRAFEQEDRFFVKNLEIVDTNASPFFHNFAANEWLIQRLETVSATVLASSALCMV
LLPPGTFGSGFIGMALSYGLSLNASLVFSIQNQCTLANYIISVERLNQYMHIPSEAPEII
ESNRPPNNWPTVGKVEIQDLQIKYRADAPLVLRGISCTFEGGHKIGIVGRTGSGKTTLIG
ALFRLVEPAGGRILVDGFDISTIGLHDLRSRFGIIPQDPTLFNGTVRYNLDPLGQRTDQE
IWEILGKCQLKDAVQEKEEGLDSLVVEDGSNWSMGQRQLFCLGRALLRRSKILVLDEATA
SIDNATDMILQKTIRTEFADCTVITVAHRIPTVMDCTKVLAISDGKLVEYDEPLKLMKKE
GSLFGKLVKEYWSHYHSAELQ*

>g32391.t2
MSINAKTDSADLLKYKTVNGHGGMNSDATSISNEQKPFDFMRSLYEGAVAGAAAGVVVES
VLYPIDTIKTRLQAVHGGGKIVLKGLYSGLAGNLAGVLPASAIFVGVYEPTKQKLLKSFP
ENLSALAHLMAGAVGGAASSVIRVPTEVVKQRMQVAQFASAPDAVRCIVAKEGFRGLFAG
YGSFLLRDLPFDAIQFCIYEQLRMGYKLAARRELKDPENAMIGAFAGAITGAITTPLDVI
KTRLMVQGSARHYEGICHCVGTIVREEGTCTLFKGLGPRVLWIGIGGSIFFGVLERTKQL
LANRQPIRRDPDSLKLD*

>g68060.t1.2.5bbdf938
MAAAAPTIRSIGTKKREMQGLLLGRYELGKLLGHGTFAKVYHARNVKTNECVAIKIIDKE
KVLKIGMTAHIKREISILRRVRHPNIVQLFEVMATKSKIYFVMEYVRGGELFNKVAKGRL
KEEVARKYFQQLISAVAFCHARGVYHRDLKPENILLDEDGNLKVSDFGLSAISEQIKQDG
LFHTFCGTPAYVAPEVLGRKGYDAAKVDIWSCGVILFVLMAGYLPFHDQNVMAMYKKIYK
GEFRCPRWFSPELTRFLTRILDTNPETRITIPEIMENRWFKKGFKHIKFYIEDDKLCSIN
DEVGEGGGGGAADGFDSDQSFSESESDVENRRRLTSLPRPASLNAFDIISFSRGFDLSGL
FEEGTDGERFVSGAPVPKIISKLEEIAKVVSFAVRKKDCRVSLEGSREGVKGPLTIAAEI
FELTPSLRVVEVKKKGGDRIEYEDFCNRELKPGLLNLTLEDAPDALPSDTE*

>g10757.t1
MKTYEIMEKFHLSPDQEAFFTFLNILCKHGNIEEAEEFMYLNKKLFPLEIEGFNIILNGW
CNIAVDMVEAKRVWREISKCCILPNETSYTHLISCFSKVGSLFDSLRLYDEMQKKGFVPG
LVVYNSLVYILASENCLKESLSMLNKIKKAGLHANSTTYNNIIKPLCEAMKIEEAKLALA
MMIEDNVSPTIDTYHAFLTNISLEGAFEVLNHMRKAGLGPSRDTFLQILSKFFELGQVES
ALKVWVEMKQYKIVPDSAHYTCLVEGLAKCGLLVKAREFYNEMRCEGNANDPKLEKLLKE
PANRRHDKGDHTRIVDSTRKSQWSSHGVSSTIQNEGHGALPVKMETQETRDKEMVILALK
RTAADMGGAGLEPPGAKQMRTLVEEQAT*

>g43449.t1
MNVAMQLSKCADTFRCYSVIFSFLVTIMGLVIPWSLTLAMVDAFSVYVKRPSPQPGILSV
VVMGDWVLCFLSLAASCSSASVTDLLMVSGGSFCSAKLCGRYQLSAAMAFLSWFLSLASS
LFNLWLLASL*

>g52668.t1
MTPAANLAGQFGDTTYTKVFVGGLAWETQKETMKKYFEQFGDILEAVVITDKATGRSKGY
GFVTFREPDAAMRACADAAPVIDGRRANCNLASLGVQRSKPSTPKQGGGRNFRVMSAFQS
AAATAGGGGGGGGYQGGVGTAFPSAAFPHYAIQQGIPYNLYGYSPYSADYTYPTSYYSIY
GGTTTAQYPIYGTGAAGGMSMITGAAAAAAAFYPYLNFGEGGGGATTGYTSSHGYGIQYP
HHLFQYSAAINSSGAYPQHYGAAAGTPISLAPTTPPLQSGVTMALHATIPHR*

>g32664.t1
MDNSVNSWFSELEMEDPIFNDQYDITDFFDEDLSAAIGEDFLNNNSSPEGNTCSSPLIPR
SSSTSTLSALSAMEAPPVNTERPAKQQKPNGYNSSSLLNMPNHHNQPMILTFGNPVMPDI
NPQQVNLEDDAVSEVLTSHGSFVNLEEATKTAQKKKKTGGRVRPASQTYDHIIAERKRRE
QLSQRFVALSAIVPGLKKMDKTSVLGDTISYMKQLQERVKTLEEQAAKQTKESVVFVRRS
QLLDEDEGSSDELGGHDEQPLPEIEAKLCNKNVLLRVHCENHRGVLVKILSEVEKLNLAV
ISTSAAPFGSLALDITIIAEMDKEFNLTMHEIVRNLRSALQRVIEDDKRQNP*

>g54819.t1
MGFLKSPKRSKWYMCFRPHAEDYPLKPTSCSGKSGKESMLPRNIFVTLSGGGNNFDSSSD
GEDRPSKKSRARRSFSRGFKAVLFQSPLAKKKNRRKSGQETASRTSSCKFSSKLDKLFNS
FRDKKTSSLDNSLRTDSSRSSLFSSSTQAGLSSLSSSRASSIASNSRSASERKRSCFIDL
KQPNQKPTIYSKKNNGYCNSNVGLYFLLICLVGLVFWGKAFAIFCTSTCLFLIPCRFKRV
ADQSAVNSNVGPIDIDSDEYKKKVLMEGLLERNRNTFTRIL*

>g41859.t1
MGTENPNRANFPLRPTTTPFSAPQNASPFASSGLVAGAEASAFRPNNPVVPSQVPPSFSS
GPLTGPEASGFRPVQPGRSNGPAGPPPPSSYGLPQTGSFQHFPSPQFSSSAQVPPPRTSS
GEQPVFAPPVRPPVGPFSTPPVSFQMPPQPSSIPIGSPPQIINTVQPGTNVPQSSMDSPF
AAPRTNLQSSSPPMRPPYPAAQGTLQSAFPGYPSQQPNVVPQTPPVNSVAFPPQQGGYAA
ALPAASRPYLSQQGGYMQSPPVAAPVGMYSRDHMQHPGSLPPTGTAQGLLEDFSSLSLGS
VPGSLDAGIDSKALQRPLDGDVEPKSFAERYPMNCSSRYLRLSTCVMPNSQSLASRWHLP
LGAVVCPLAETPEGEEVPIVNFVATGIIRCRRCRTYVNPYVTFTDHGRKWRCNICSLLND
VPGEYYAPLDASGRRVDLDQRPELTKGSVEFIAPAEYMVRPPMPPLYFFLIDVSVCAVRS
GMLEVVAQTIKSCLDTLPGFPRTQIGFITYDSTVHFYNMKSSLTQPQMMVVSDLDDIFVP
LPDDLLVNLSESRTVVDAFLDSLPSMFQDNVNVESAFGPALRAAFMVMSQLGGKLLIFQN
TLPSLGAGRLRLRGEDARVYGTDKEHTLRVPEDPFYKQMAADFSKFQIAINIYAFSDKYT
DIATLGTLAKYTGGQVYYYPNFVSSIHKDKLRHELARDLTRETAWEAVMRIRCGRGVRFT
SYHGNFMLRSTDLMALPAVDCDKAYAMQLCLEETLLTTDIVYFQVALLYTSSSGERRIRV
HTAAAPVVADLGEMYRLADTGAVVSLLSRLAIEKSLSYKLEDARTSVQTRIVKALREYRN
LYAVQHRLGGRMIYPESLKLLPLYGLALCKSTPLRGGYADAQLDERCAAGYTMMALPAKK
LLKLLYPNLIRLDEYLLKTSFADESENIWKRLPLTAESLDSRGLYIYDDGFRFVIWFGRM
LSPDIARSLLGEDFATDYSKVCLTEQENEMSRRLKRIIKKYRESDPSYYQLCHLLRQGEQ
PREGFFLLANLVEDQVGGTNGYADWILQLHRQVQQNA*

>g66899.t1
MSTQVQVAEAMQVDEDNDQKRDEAEDTIKDPLNSDHQITALPFRQLLNYADAFDWFMMFF
GTLGSIIHGLAQPIGYLLLGKALDAYGNNIGDTDAMVKALKKVVPYVWYMAIATFPAGVV
EVGCWMYASERQVSRLRLAFLRAVLSQDIGAFDTDLTNAKVISGISNHMRVIQDAIGEKL
GHFLSCFATFISGVFIAFISCWEVSLLTMIVVPLILVIGATYTKKMNSISAAKMTFLSEA
TSMVEQTISQIKTVFAFVGENQAIKSLSRCLEKQLIVSKREALIRGVGTGMFQTVTFTSW
ALIVWVGAVVVVNKRSTGGDVIAAVMSILFGAISLTYAAPDMQIFNQAKAAGEEVFQVIK
RKPTISYNAEGKTLELIDGNIDLRNVYFAYPSRQEKAILQGFSLSIPAGKVVALVGSSGC
GKSTIISLVTRFYEPEKGEILVDNHNIKEIDLKFLRRNIGLVSQEPSLFAGSIKDNIRVG
NMDTDDQQIQRAAILANAHTFISQLPDQYLTQVGHRGVQLSGGQKQRIAIARAILKNPPI
LLLDEATSALDSESEKLVQEALETAMNGRTVILIAHRMSTIINADMIVVMENGKPISFQS
LEQHEEPTQLSNYLRDPLKEREEKEIRETTIFFRIWFGLNKKDFSNIFIGSFAAAFAGIS
KPVFGFCIITIGVSYYQSDAKKQVGWYSLVFASIGLLSLFAHTMQHYFFGVVGERAMINL
RQALYSVTLRNELAWFEKPENSVGSLTSRIINETSTVKTIISDRMSVIVQCISSIVIATI
VSMRVSWRMGLVAWAVMPCHFIGGLIQAKSAKGFSIDSIAAHSELVALASESAANIKTVA
SFCHEDHILERAKLSLKNPLKKSRRESAKYGIIQGVSICLWNIAHAVALWYTTILVERRQ
ASFKNAIRSYQIFSLTVPSITELWTLIPTVFSAISILTPVFETFDRRTEIEPGNAENAPF
ERIKGDIEFQNVHFSYPSRQEMTILNSFSLKIEAGARVALVGPSGAGKSSVLALLLRFYD
ANEGRVLIDGINIKDYNLRILRSQIGFVQQEPLLFNFSIRDNICYGNQEASEAEIIEVSR
EANIHEFISSLPDGYDTMVGEGCQLSGGQKQRIAIARALLKRPEVMLLDEATSALDTESE
RAVVRALELPKVTNINGFLSKITQVTVAHRLSTVMKSDIIVVMDRGKVVEMGSHSSLITE
SEGVYSKLYRLQNMKKN*

>g55814.t1
MEPQSSPQENVDAKATFRKPLNDSGNRIYRRRSPVGGSSSSEGSPVHENNSSPIPLRKDS
ERGADERREKDKGRDLDRDSERSNYGRSGDSYRHSDRQSSRSSRNYHRHDDYHRRDKYVD
EDDRDHSRSSRSGRVSRSHTYSDHSRRESEYRSRDHPRDADKYARDKSDTLGERGRDKER
EKDSSSGYQKHREKDLSSDRAGSGRNSYSEDVKYGERDRYVEDKVGRDEKIDRRRTMGDN
KSDRAPSYEESRGHRNDLTSKRETSGHRLREASRLDAKSLDNEKKNSDDRDRYKEHHRRE
LDEPYEDRKGHSSKDDELSAKKQKLFSLDGDNSNAAVPDEKLSSSSKQVQEIGSTVSAKQ
VPLTDSDIDAAKVAAMKAAELVNRNLIGTGQMTADQKKKLLWGNKKTTTTEESANHWDTT
MFGDRERQEKFHKLMGVKGEMKGEQHKPDNEDVEKQREQLQMDLEKQYTAGLRRRDGRTV
GLGL*

>g68641.t1
MVDYIDDGDVLWHRDTSSFSCLLQDNGTTIISAGKSFELGFLNPENKTNAKRYVGIWYYN
FSPPTVVWIANRDEPLLNGTGCFAIDEDANLKLFDGDKNAQLDTNLGSSSDANRTLKQLD
SGNLALVDGRSGNYSRQSFEEPTDTFLPGMTMDENLNFVSWMDPGDPTTRSYTFQQNQVD
NTVYMMLVLY*

>g15355.t1
MLELFLIITNLSGLILIRRCFGFKNIIEAPPKKNDDEVVLNKKSLGGCVVAMIVDFLLIL
VPFILFLTVLSEWTYVNATLVILLLLICFSARRIRSSSIQEDGFRAFRTNVSSYRVSMML
VTCLCILAVDFKIFPRRYAKTETYGTGLMDLGVGSFVLANSLVSRQAQGTSTVRLGNAVR
SCSPLLLLGFARLILTSGVDYQVHVGEYGVHWNFFFTLAGVAILTSLINVPSRFCGVLGF
FVLVGYQFFLLHGLNEYLLSDKRGTDIISQNKEGIFSIFGYWGMYLVGVQLGSLLLFGNH
AEAMLRANKGANTRVWMLCILFWSLTLFLDQQVERVSRRMCNLAYVALVLALNLQVLAIL
TLSNYIPGNRISMLEEALNQNLLASFLLANVLTGLVNLSVDTLVVSSAAALAILLLYAFT
LCAFVGCVYFFGIKLKFW*

>g23577.t1.2.5bbdf939
MGKNKDKKKQEELLKTLGDFTSKENWDQFFTIRGSDDSFEWYAEWPQLKDVLLPHLSSPP
ASAADGGGSSRGKAEEVQILVPGCGNSKLSENLYDEGFPNITNIDFSKVVILDMLKRNVR
LRPEMKWRVMDMTQMQFEKESFDVVLDKGGLDALMEPELGPKLGNQYLSEVKRVLKDGGK
FICLTLAECHVLGLFFPKFRYGWRMSIHVVPQKTTERSSLLTFMVIAEKDSSTSFSQISS
TIDQSLIANYGNQARGLYEVLESENKIRSKYSSGSDVLYSLEDLKIGAKGNLAELNPGRR
VQLTLGEPGGSLFTYKVVLLDALHSSGPFSYHCGVFLVPKTRAHEWLYSSEEGQWVVVDN
SKAARLVMILLDSSHSDASMNDIQKDLSPLVKQLEPGDCDSGAQIPFMAASGGIKQRKIV
HQATSPLTGAITVEDVIYEKNDDYISCLFPSMDVMFRRLTFGRSENLIQSEALLTRVGSK
EVGEIGEKKTRLSTKHKRKGSQRRSSMSEPNNELRVDHNYLASSYHSGIISGFVLISSYL
GSVASEGDTAKAVVIGLGAGLLPMFLHGCLPFLEIEVVELDSVVLDVARDHFGLKEDINL
KVHVSDGIKYVREIAISEVANEVTANCGLVEGKSPVAECKSVTKIDLLIVDVDSTDSR*

>g55531.t1.1.5bbdf935
MEIKEAEKVVIAKPVASKPTCSSLRSFSELLAGAINASSSNASSESAVTAIRPRTVRFTP
TVNHSLVGVVSSQADPSVSDALSPSNKVLKPDRKSVVYKPMAKLVSKTTVSLLANMRSAN
LIQKDKLAEVGANLQQSNLVKDQSYLRSELHMAEKDKRYEHSYIASENLEEDQRSLSNTA
NGDRPSYDGYNWRKYGQKHVKGSEYPRSYYKCTHPNCPVKKKVERSLDVQIAEIVYEGEH
THPKPQPIKCNSSDGHYQGNPSNESKNPLWNNQHGDKNDWFEGTIANQNAFGFSAHPSYS
GRAPSFVDPITAGASNFGVSTHDNSSCHSGEFEEGREELEAECDEPKSKRRKNDKQSNEA
GTSADRTREPQVVAQNTIDSEFLRDGFRWRKYGQKIVKGNPYPRSYYRCTSLECNVRKYV
ERTSDDPNAYITTYEGKHNHEMPIKSTISVAAKTSTKAVGTKDVS*

>g25229.t1
MSFCSLIIFLFGSLNSILCPLSSTAALPLSPLFLSHRHSCLSSLCVSRHRLNAASITVES
FDAAAVSEDTFVDLLIFVYGYAWQRFIVLFFCGYFFIPS*

>g16567.t1
MMTGKNSPSHVYFELDDERPFDEDGLMDEEEASEGDAETKRDVGERDPLCPEVFIPSKLV
KSLHKDWKNSLIVKLLGRSISQELLKQKVQNLWNLESEYDIIGWGNNYYLVKFDSVRDAH
KQVLMKKNLTRDFISTSETPSAERISTLPISSLRQEMDNHALQVKDILFEKIPPDIKLDG
SLKSGVMDEIEGPVGGNLDQVMLISSSASNGNPGNEEFRCVLKDMVRDHKTDIVIILESK
VSSMGSIRFFNKISMDKMIAVEAVGQAGGIWLAYNSSRVQIQEIGKHDQVLHVQVSGNFE
AFMGIWLQ*

>g38478.t1
MAISTETQQEHKGSSEDSTAVEKKRWTLNDFDIGKPLGRGKFGHVYLAREKRSNHVVALK
VLFKSQLKQSQVEHQLRREVEIQSHLRHPNILRLYGYFYDQKRVYLILEYAAKGELYKEL
QKCKYFSERRAATYVASLARALIYCHGKHVIHRDIKPENLLVGAQGELKIADFGWSVHTF
NRRRTMCGTLDYLPPEMVESVEHDASVDIWSLGILCYEFLYGVPPFEAKEHSDTYRRIVQ
VDLKFPPKPIVSAAAKDLISQMLVKDSSQRLPLHKLLEHPWIVQNAEPSGISRS*

>g52691.t1.5.5bbdf93b
MQPEPAATQKESGPETTGFQIGQRVVHSGGGGGGGDTRRRTGTVKYVGLVEGTSGNWVGV
DWDNDGDGKNDGSNNGVWYFEARGPTTASFVRPHNLSSSGITLLEALQLRYRSTSTKQEQ
DEMYVLSSTNKRVSIELLGGDKIQDKLSRFEELTGASLSYLGVSSPGHICDTLPNLKELD
LTGNLLSDWKDVGIICKEIPALEILNLSYNLMSHDIIGIPKLHNIRILVLNHVGINWKQI
EVLKDSVPLIEELHLMGNNINELTLPSTMRVEGFDFLRLLNLEDNCLADWNEIVKLSQLK
SLEQLLLNKNNLSQIWYPEHNAIDEAGNESPGRSFRPFQNLRYLLLGGNNIKDLASVDAL
NSFPVLMDVRLSENPVADTGKDGVPRFVLIARLANVKVLNGSEVSPRERKDSEIRYVRLV
MTKYNHNMEEIMQFHPRFAELKKFHGIEDAKAPIGGAGPQKMSSGLISITLKCVGASIGE
KPPLTKKLPSTTTVIIVPASIIISFCQMLFQVIHFKCFICLGRQIEEPV*

>g35951.t1.2.5bbdf939
MFYSQFILAKKGPLGTIWIAAHLERKLRKNQVADTDIGVSVDSILFPDVPIALRLSSHLL
LGVVRIYSRKVNYLFDDCSEALLKIKQAFRSTAVDLPPEESKAPYHSITLPETFDLDDFE
LPDNDIFQGNYVDHHISSREQITLQDNMEGVGYSTSQFGLDERFGDGDTSGLDLDEASLH
SLTPLKEEEQEGMPVNPEIEIESMDYAQAPCTPGLVEEPNLSNVQETSACDDHVESEDNQ
LMEATVKENLDNNSSILNLHQGNKHMADWSMPNENGYHSSDMGIKQGTSPPTKANVEHIS
SNDRDAVSGLLADKIVTASDSLDREEELQDEIVKTDGTDVPSVDMSHGKHGEIIVVFSGG
GIKDASGLVSLCLQGAEGDGENSNNLGNVEKPSSPRDASHFGADFQDTSGLREPETHASG
EPKDSQTSNLDNEIPSGHDHILRPCNADLGEPDSSHTGAEHSNDLEPSDVAAVRMETSKR
VGTSGASTFEKGEVCNSVDIEQNSKDNHTIEPASLDDTPVDSDKLDDQGNNVHQGDNKNS
SADIDFPAPEKMLLVPDGFGDQPRNLLVEATPGDMAGVDESEAGSRIVSGRKRSYTESTL
TEQSLYSVESSRTVRGKKAVEAVPDDDDLLSSILVGRRSSVLKVKPSPPPPCELTSLKRH
RSAPRTSSSKRKVLMDDTMVLHGDIIRQQLINTEDIRRLRKKAPCTRPEIAMIQKQFLED
EIFGESLFSGVSIRLASLHNQPYDLTRIMLTHDEVNDENAVDFVRPEVVETSMDIGVEPA
TAKENGEILQVETCELSDSKHGEDYDPNMGVNSIEKQMKPIEDLAVADPSSSRLEHLQNF
AEIEIGGSSSIAGAVNPAFPLDSDRGSGDIGDISADTVQRVSMDRSEMDAQMQMDEPHVA
SNKIRECERVAVDTSMMDGVCEIMNDDNDDTVKVGDFIASVETVHSGRDGISVEAIKSGA
TETERDAYYLGMDYNAYAIEIENMDGRRVQNNDPVYDGTFHEQPIISLSSVTENVTLQGS
FLHEGEHPVQHDSYLADIGDAEISGIDMHDRDDLNYSATANDTEFLNFDDDEVAEVTDDY
TPKAEEIRFVENSGWSSRTRAVAKYLTLHTVMMQWVSPLCLVVD*

>g9677.t1
MDVTTGSCQFHDKKPFEVPTNEAKKPVENNSKTPVFVNHAENAWHESRKRWIGDLHQRSK
RIEKDPIISWSMTYEDLLSTNDPFPERIPLPEMVDFLVDIWHDEGLFDSNVPCS*

>g55503.t1
MASTSNSGGGGGAVNKIERGHQMYRDGRFEEALGFYTEALSVAKTNPQIIALHSNRAACY
LKLHSFKKAAEECTRVLELDHNHTGALMLRAQTLVTLKEYNSALFDVNRLIDLNPSSEVY
QNLQARLKTQLSLAPIPEDDAELEEDVDDAELEEDNEDETELQADEEKERKAVEECEDGG
KQVIEAVVPKEQKAEVNEATPKNEVTAQNRSISKSSKQESSGWQAIPKPKGHSQLDYSRW
DSVQDESSDDDKEEDDDDDESQPQYRFRVRTVGVRAVK*

>g60454.t1
MKQLSCTYNLTKKNPLSSGLVKFAVSFLLLGIAYRLYSSNYVQFSPVEVTESTTFDNVVH
TFDPRVEVKNKSSQNAAMCDLFVGDWVPDPTGPYYTNSTCFSMEPHQNCMKNGRPDTDYI
YWRWDPRDCDLPKFSAKKFLHFMRNKSLAFIGDSIVRNHAQSLLCTLSQAEEAIEIYHDE
HYKSMSWSFPIHNFTLSVVWSPFLSKATIFEDDNGVSSDVIQLHLDELDAVWTQQYNNFD
YILTAGGKWFLKAAVYYENNTIVGCHNCQGMNITEVGFHIAYCKVVNSTLKFITSSKHKV
YTFLRTTTPDHFENGEWNSGGYCNRTKPFREGEVDMDSIDEMMHKIELEEFEMASAIGSQ
NGINLKLFDTTHLSLLRPDGHPGAYRHFQPFAGKDKNAKVQNDCLHWCLPGPMDSWNDLM
LRILLNS*

>g32822.t1
MASSCAVKQALGDLNKESFVTLLRKLIGESKFVQNNPPELIPEEDRIVRHVLDTLLPFST
TTGGGPLVINHVTYKPNRGNLIVEYPGTEPNKVLSFVGMHMDVVTANPSDWDFDPFSLSI
DGDKLRGRGTTDCLGHVALVAELMKKLGETKPELKSSVVAVFIASEENSCIPGVGVDALV
KDGLLDKLKQGPLFWIDTADKQPCIGTGGMIPWKLHVTGKLFHSGLAHKAINPLELAMEA
LKVIQLRFYEDFPPHPEEQVYGFATPSTMKPTQWSYPGGGVNQIPAECTISGDVRLTPFY
SVSDVLKKLQEYVEDINQNIEKLDCRGPVSKYVLPDENLKGRITISLDNALSGVACNLES
PGFRVLCKATEEAVGHVKPYSITGSLPLIKELQDEGFDVQTAGYGLMATYHAKNEYCLLS
DMCQGYQVFISIISQLED*

>g67105.t1
MIRADFNLGEGPGISSRGKERRNRDKGEGREEKKRDLGEGKGKERAKEEEIEKGEKKRKN
HTPESYDTGLPVIQAYGYTCHPQRFKDLGLNVEHFAYCDKSLPYEVRAKDLIDRLILTEK
VQQIGNRAPGVPRIGLPSYDWWSEALHGVSDVGANTTFFNDNVPGATSFPTPITSAATFN
QSLWKTIGQAVSTEARAMNNLGQAGLSYWSPNINVVRDPRWGRALETPGEDPLVVGTYAA
NYVRGLQDVEGTENTADLNSRPLKVASCCKHYAAYDVDNWHGIVRESFDANVREQDMMET
FVKPFEMCVKDGDVTSVMCSYNRINGIPACADRRLIKDTIREEWNLHGYIVSDCDSIEVM
VDRHHWLNDAPDDAVAQALKAGWIWTAETFTHNTVPMQLGHFDGSPQYENLGKADICSQS
HIDLAIQAAREGMVLLKNENNVLPLDTQHFKTLTVVGPHATATKVMIGNYAGVPCRYTSP
LDAFAQIVGDRIDLSIEAESLDRNDLLLPGYQSDLIDQVSQQSNGPVILEVLSAGGVDIS
AAKNNPKVSAIIWAGYPGEESGPGIVDVVFGNYNPDGRLPLTWFENDYVDQIPMTYMPLR
PNPELNYPGRTYKFFNGSTVYPFGHGLSYTTFQHSIEVPTNSLDIKLSKLQYCRELNYTE
GTKVPSCTGVLIDDINDICDNLNVEFDVDVANAGQKDGSESVLIYLLGSSTGTC*

>g69949.t1
MESCNCIEPQWPADELLMRYQYISDFFIALAYFSIPLELIYFVKKSAVFPYRWVLVQFGA
FIVLCGATHLINLWTFTTHSRTVAIVMTAAKVLTAAVSCATALMLVHIIPDLLSVKTREL
FLKNKAAELDREMGLIRTQEETGRHVRMLTHEIRSTLDRHTILKTTLVELGRTLALEECA
LWMPTRSGVELQLSYTLRHQNPVGFTVPIQLPVINQVFSTNRVVKISPNSPVARLRPSGK
YMPGDVVAVRVPLLHLSNFQINDWPELSTKRYALMVLMLPSDSARQWHVHELELVEVVAD
QVAVALSHAAILEESMRARDLLMEQNIALDLARREAETAVRARNDFLAVMNHEMRTPMHA
IIALSSLLQETELTPEQRLMVETILKSSNLLATLINDVLDLSRLEDGTLQLDIGPFDLHG
LFKEVLNLIKPIASVKKLFVTLSLSSDLPEYAIGDEKRLMQIVLNVVGNAVKFSKEGGIS
ISAFVAKPESLRDPRAPDFFPVPSDNHFYVHVQVKDTGSGINPQDIPKLFTKFAQSQSIA
TKNSGGSGLGLAICKRFVNLMDGYIWLESDGLGKGCTAIFMVKLGIHGRSNEAKLQYVSK
ALANHVRTSFPGLKVALMDDNGVSRMVTKGLLVHLGCDVTTVSSGDECLRVISNEHKVVF
MDVSVPGIDIYEVAVRIHERFSKRHDRPLIVALTGHTDRVTKESCLRVGMDGVILKPVSV
DKMRSVLSELLDHGVLLEA*

>g69963.t1
MRFIREPFSASLSLFPGPPIPSIILMAIQTLASSSPSNPNNAAVSEDDDNRLCSEQRQEQ
AQQEPEEGGTVSLGPNPNGYLIGELRIERAWAHWKKLGQPKFIVAPMVDNSELPFRMLCR
KYGAQAAYTPMLHSRIFAETEKYRSQEFTTCKEDRPLFVQFCANDPDILLEAARRVEPYC
DYVDINLGCPQRIARRGNYGAFLMDNLPLVKSMVEKLANNLSVPVSCKIRLFPNLEDTIN
YAKMLEDAGCALLAVHGRTRDEKDGKKFRADWRAIKAVREVIRIPVLANGNIRFMEDVHS
CLEETAVEGVLSAESLLENPALFAGYRTAEWVSGSEDICTDGKLDQADLLVEYLNFCEKY
PVPWRMIRSHVHKMLGDWFRIHPNIRDDLNAQSKLTFEFLYDVVNRLRKLGVRIPLYVKD
SCVERMSAHGIAT*

>g28830.t1
MGKHPVGKPGRWEAIAEGFKGRHSVESVIKRSKEMEEKRVSDEDSYKRFLKYREPVDRRI
EGANESNVGGLESVEVKKENSGWSSGEDLALLNALKAFPKDVAMRWEKIAAAVPGKTKAA
CMKEVAELKKDFRSSKAASGDA*

>g21808.t1
MLNTVALAGAEIPLHVTCTAGHLYFVKEVIQLRKEFAEELNQNGISPLHIASANGHIEIV
KELLKIDHNLFLLKGGEQKIPLHYSSVRGRLQVVKELLAANIDSIPEVTARGETALHLAV
KNHQFEALKVLIEHLKMCDKADILNKKDEQGNTVLHLATSRKQFEVIDLVLNDQVLARST
DVNSLNEEGLTPLDALVIFETEAGDRQIERMLRLNGVLIARDMPSLPHTSVNQRGLSGTD
NQTIVTQAKSPAKDLIDYFAYDRARESPSRARNTLLVIAILIATSTYQAVLSPPGGVWQD
DNE*

>g43145.t1
MGIQKPAWLEALYVQKFFVPCSIHESAKKNEKNICCLDCCTSICPHCVISHRFHRLLQVR
RYVYHDVVRLEDLEKLIDCSNVQAYTINAAKVVFIKKRPQNRQFKGSGNFCTSCDRSLQE
PFIHCSLGCKVDFVLKHYKDLSPFLRTCKVLQLSSDFFIPQDYGDDEMTNETPHSTIVDC
DEPLSSSSGSSGSENMSFMCTEFVRKKRSGYVCGKSASKITNEDMATSMSRRKRVPHRSP
LC*

>g34919.t1
MLKLSKEQAKKLKKKANKDQDLLRKTSSHQREFSLFEAVSAHLWKCMSMARMLKPVQETV
LYMHLDFRNRLKAPLPKSYFGNAVVVVPITAIVGDLISKPLSHTSSKIRAALENVTDEYI
RSYIFCMKNISDVSSSQYFHNVGCSQGSFFGNPNLTVTTWVGLPLHGANFG*

>g17189.t1
MAELEYQKPSNNGRLKLFGFNVTDEEEVESTKTPSGSPDSGGFPASDGRKYECQYCCREF
ANSQALGGHQNAHKKERQQLKRAQMQASRNAAVSYMRNPIVSAFAPPPHLLAPAGSVVVP
AAGPASPSWVYVPRAAPPFHVSHGCMFPTSTNGRGVGNLSYAGSVGDSSLTSVGPHQKAH
NGKLDGPSLSRFSRADDGPGFDDAFGLDLHLSLAPAAREF*

>g64158.t1
MKYSWSVACEVLRLWPPAPGSFREAVTDFTYEGYTIPKGWKIHMVFHATQKNPEYFPNPE
KFDPSRFQKDGLIPYTFVPFGGGMRMCPGNEYARLAILIFVHNVVTKFRLETAIPEEKFV
YYPYPSPAEGLLVRLHPHKA*

>g66532.t1
MKPIRLPEPPASPRAIGGGVGGMTDIFDAGVYGVVRRAVVIGNGFTATENQSLGLVRALG
LSDHHTLYRVTRPRGGINEWLHWLPVSVHKKLYIIIRQIYSCSRILFTGGGKKLMPLPSA
NGFSGGLSSVPEADVKKIVSMARETFEKEGPLLVVASGRDTISIASSIRRLASDNVFVVQ
IQHPRSHLERFDLVITPQHDYYPLTPQAQEQVPRFLRRWITPREPPDRHVVLTTGALHQV
DSAALRSAASVWHDEFAPLAKPLLVVNIGGPSRYCRYSRDLAKQLTNSLHNVLASCGSVR
ISFSRRTPDKISNIVVKELGTHPKVNIWNGEEPNPHMGHLAWADAFIITADSISMLSEAC
STGKPVYVIGVERCTWKFVEFHKTLRERGLVRPFTGLEDMSESWSYPPLNDTAEAASRVH
QTLAERGWVLRP*

>g48181.t1
MAAQGRPVSVVSIIGPQSSGCRPPKEFGWEGVDYQKIAPLSLIQRAVMEQKERMCADVGK
YNAAGLPLLKIVFEIKVEATENYELKQEQFKEEVVSLRERIINYTTSGEVASDRTAASGF
ADYAKKIWDEIKEDKDLDLPSYRVNL*

>g68524.t1
MANFRGQLEEIKKFLQSSSLDDPKSEKSYAYSTLSSLQELATTTPNGSSLIQLLADSANV
LVSLIIADIFDDDEKIAAQALKCLGFMIYHPSIVPMITGDNADIIIDSLLKVITTSGIKS
VCKLGVWCISIQQFSLAFLDAHFHSLLRTLVYALDNPIGSLSITYEAMQAVAKLATLLSE
KMRDTSNAWAPPLYRRLVSVDKREREITERCLLKIRFLLCAAPVTLSKTILCDLKKNLLP
AMKELLNLGMKIQTMQAWGWFIRFLGPYAMKNKNFVNEMLKLPEQAFSDFDPQVQIAALV
AWEAIIDAIVLLPIQASEDDSVPMISKQHAAISTGDNCRTEADRFLKEIKLIMTPLKGIM
SSKFDLSVHVTCLNTWSYLLHKLDTCISSNIVIEYVWRPILELVFQVRPDNRSVWLWNIC
LDLLDSFTLARVVYKNDSPNNLESSKLLEKSSVVQPLEISNCSWKHYAIKWAPWDLNQLE
FFIKMIDIVISQASNISVSLEYRRLGYSAALKLFKSLLTAVQVVVKCIPVAYDDIMLCLN
TVFRFLKKVCEGVTLDDSNVVDMPHASLQLLEVVAEEIEPLVLQSPLYKMALDLKSLDKL
EPVSKLRSSSAPDIWYASYMDMVSPIVCLNVLYVSVAVKLTSKAADINSITDRMYKHIMY
SLCSYDTLEILNIFVGLLYKYEAFDCLGIWKTLANCLKDYVDDKNHPSPFKMGSNNNSYS
AVLHLLAYPVAQQQRLLQLQDVIEVWELLYLSVNHDLQLQYSPPENFPEDLSSVLNEYLN
DITTMVDTEGELQQRDKNQVADTLLLIGKVVVCILEQLISKVCARRCTMNNGSNRTSRNV
KSCLEFASRFLKLAFAREETTVPMIQTLTARIFSTLIQYVDSLHFKEDIVAFVETMTSPL
LDWLPLVEVKDENIISQVQLIWTKILNSLQRSWPPIMFDSSFLKFQASLLEKTLDAWNFT
ISENTFNFWNSTYGEQIHLDYPQNLLPVLDKLSRNGKINICKTKLASNGNTCSGATSSFT
HQRYTVTATLNSCSKRVELLGDAMNDLQGINELRPSTKRKWPGLTEHQKEVRRAQQGRAR
DCSGHGPGIRTYTSVDFSQTNEESQESQEIRDADSILEMLRRVP*

>g14915.t1.2.5bbdf934
MSNAALVAIARNCPNFICFRLCIIEPRAPDYLTLEPLDTGFGAIVERCKELRRLSLSGLL
TDRVFEYIGKHGKKLEMLSIAFAGNSDLGLHHVLSGCESLRKLEIRDCPFGDKALLANAA
KLETMRSLWMSSCSVSFGACKLLGQKMPKLNVEVIDETGPPDSRPENCPVEKLYIYRTVA
GPRFDMPAFVWTMNEDAIWKFS*

>g12366.t1
MGKIKIGINGFGRIGRLVARVALQSDDVELVAVNDPFITTDYMTYMFKYDSVHGQWKKHE
LKVQDSKTLLFGEKPVAVFGIRNPEEIPWGEAGADYVVESTGVFTDKDKAAAHLKGGAKK
VIISAPSKDAPMFVIGVNEKDYKPDIDIVSNASCTTNCLAPLAKVLNDRFGIVEGLMTTV
HSITATQKTVDGPSMKDWRGGRAASFNIIPSSTGAAKAVGKVLPALNGKLTGMAFRVPTV
DVSVVDLTARLSKPASYDQIKAAIKEESETNLKGILGYTDDDVVSTDFIGDSRSSIFDAK
AGIALNDNFVKIVSWYDNEWGYSNRVVDLIRHIASTVN*

>g2755.t1
MPWVQSGSKISPAIIFIIVILAVVFFISGLLHLLVRFLMRRRSSLSSQSDAYPDLSGSEA
YQRQLQQLFHLHDSGLDQAFIDALPVFLYKDIMGLKEPFDCAVCLCEFSEQDKLRLLPLC
SHAFHIDCIDTWLLSNSTCPLCRGTLFSSEFSVENPVFEFDDSRDEDWEVSGNVGVVVPC
GPKPAEAENIINEKRVFSVRLGKFRNTNTNDSARCEDIEVGETSNSNLDARRCFSMGSCQ
YVVADSELQVTLCPRRSRGNGLDLRLLRAKEKGGQNGNSLNDGDMEGKKINIRSKGESFS
VSKVWLWSNKGKFPSSADNQISSSINVSLPWTARTHQSIARCP*

>g8702.t1
MQFEDDLVEISLPTLVIDSLPSEAANKPKNHDCYKKDTTKLVDPLVNNLKARANLSEEKG
KFNDRLDKIIFEEVKEETEANGSD*

>g30431.t1
MAGTGKAWGGRGHREQLLFVDGSGCIGVGGGEFMGSGGYGLMGLLFVGVVKQWQGGGDCL
VVFAYCEAGWWVLVSGLLDGLLWLFGLIDWGELRLFWWCSAGG*

>g18001.t1
MCYVGKATKIFIFIVTVLVVTGLILGFGLLRHGIHKSHNNKCSGDSCYQPPMVFPNPSPG
SSNNNSPSSSFTSPNPNPSETSPPPPPPPPPAVVAPPVGGENPSPPNPSTSAAPPPPPPA
PPLPLPPPPPPPPSVPEAPPPALSPPSPVTGAPGPIHS*

>g27619.t1
MEISDDPCDKEVNGDENERTDSLPSTSTNSAYKLFGRHSSVHQMMGGGKAADVILWRHGH
FSCGIIVVATVAWLLFERSGLSSLSITSDVLLILIVLQFLRANYAVFRERQLQSLPELVL
SEEMVNNAAASFRAKINYMLLMAHDITLGKDFKLFFKVVIALWLLSVIGSLISFCTLVYI
GTIIFITVPALYSRFEERVDRCAGLIHRRFSRHYKVVDENVISRLPRNLPRDKDL*

>g65703.t1
MGKKKMKLSFPFKSKETVVSTSWPWPTCGNPKTLSFRASQEDNGGINFFKTMNTAYVDAN
NLELVEVPDLYFSSNVCYECGSFSSVFCEEESVETVIRGLRRSERLFFEPGETSSILEKA
KMDGFPFKESVAMAVDSRDPFADFRRSMEEMVEAHGLQDWESLEELLTCYLRVNEKSNHG
YIVGAFVDFLVGLAFASAAAADEDDDPVVSTASDQYHCSSSMTPSFTSPFSLSTTTTSTS
PSLSLAEVEDEIEKTIDNASSSDV*

>g46942.t1
MAPTPSSKSNSMMQTPSSKSNPTHNQSRTPQSKQRLNFHISKPSPNPNSSAMAKENNPAE
HPVEVIGRIRDYPDQKKNPFSSSALQINPDKQSLRVKTDIGYRDFSFDGVSLSEDEDLDV
FYKKFVESRINGVKLGDKCTVMMYGPTGAGKSHTMFGCSKQPGIVYKSLKDILGDGEEQN
EENGEKVGPATFVQVTVLEIYNEEIYDLLSTNNGGGFNLGWPKGGSASKVRLEVMGKKAK
NATFIAGHEATKISREIQKVEKRRIVKSTLCNERSSRSHCMIILDVPTVGGRLMLVDMAG
SENIEQAGQNGLEAKLQTAKINQGNIALKRVVESIANGDSHVPFRDSKLTMLLQDSFEDD
KSKILMILCASPDPKELHKTICTLEYGAKAKCIVRGPHTPIKEKGAEDSSSAVILGSRIA
AMDQFIYKLQMENKLREKERNEAQKELVKKEEEISALRAKVALIDGKGSDTMEEEINLKA
NQQVQKLKTELEKRIQECRKMADELIEMERRKMENLVLQYQQEVEMLRQRLREIESELCN
SRVGGASLDMDGSNFVRKLLDAYSEDPGMVKSMDLDKSYDLDAGKQDVAVYKAGNNETKS
VLEFDSGKNSRGEEDYDVLVRSFSSKACLSTVFEEDEEEDSGDDKEKFLDEEVQKEVIEE
KKVSSSTLAAESPLTLVGSPKVSFQNHEKLENFRDTAVEKLLQTESLSEPESANDTASSR
RMRIQNIFTLCGNHRELSQHIRTPMPARKRSENIDPMASPARTTEENSAAKLFSEVKHLQ
KSLSKDISALGNPENNQTPTGNKKMSALSSIETMLESKENYNPIDEKSGDLDVYVKWEAS
MDNPGKFITTLKVVKDSTLADLRTLIEIHLGGDNQAFTFLVLGDPSGAPVPREKEATMQA
LKLPVCNNQLPGRLACLRPSKGALHTPHHLPLSPLENKLPVTPIPNVTKHCDYLSPELPP
HLNSTPFVTVRRY*

>g35884.t2.2.5bbdf936
MQRLREGAQLQVLETDHIIICGINSHLTFILKQLNKYHEFAIRSGTATARRQRILLLSDL
PRKQIDKIADNIAKDLNHVDVLSKSCSLSLTKSFERAAANKARAIIILPMKGDRYEVDTD
AFLSVLALQPLPEMDSVPTIVEVSSSNTSELLKSISGLKVEPVENVASKLFVQCSRQKGL
IKIYRHLLNYRKNVFNLHSFPDLVGLKYRQVRCGFQEAVVCGLFRNGKIHFHPNDDEVLL
QTDKVLFISPMHGKRKPQLAIPSGVDEDDNAFQDPETLKMSGKSLGRAFEITRARLEKIV
KRSKSGSKASEWSVGRKECILMLGWRPDVVEMIKEYDNYLGPGSILEVLSDVPMGDRNRA
SKLAGQGKLKHVQVSHRIGNPMDYDTLKDTISKIQKSFKKDEDIPFSIVVISDREKQLGD
TTKADKHSAYSLLLAETICNNLGVNVHNLVAEIVDSKLGKQITRIKPSLTYIAAEEIMSL
VTAQVAQNSELNEVWKDILNAEGDEIYVKDISLYMQKGENPSFAELAERAKLRGEVAIGY
MKNNKKVINPIPKSEPLSLELTDHLIVISEVEGEQSIVS*

>g4127.t1.2.5bbdf932
MAETSRALSTVKGYDDYGAEQDEKPFLALRSGYLRPITPETCPATILVNLFPSFHSEDSS
MLPLLLVSFVICECTQPSLSNT*

>g31637.t1
MLLGKRSRPPIKRTASMTEFSLDLGTTTTTTTTTTVEGGDGGVVNSHHFDPNNPFKGLDQ
RFMAAAAVSPSQSPRPRTLRRNSAEFTPETAHFLRACSLCKRRLIPGRDIYMYRGDSAFC
SLECRQQQMTQDERKEKCSFVASKKEGAAIASGSSEVSTKGGTVAAL*

>g12681.t1
MAASVAMQSLLGSPVARVSSQKGRSQVVPFSNVLNLPKRANLRVRSTAEDDNKEMADAAP
QSTQPNAGPKLNQPNPAPKPKVSTKFEDVFAFSGPGPERINGRLAMIGFVTAMGVEIAKG
QDLFTQINDGGLQWFIGTSVLLSLASLIPLFKGVRAENETGGFMNSDAELWNGRFAMLGL
IALAFTEYVKGGALV*

>g4650.t1.1.5bbdf934
MMNEPQPKWFSESETNIEDPAVNQEWQIKSTHLSGDKIFFPNPFCTESPCPYFSFSTRTG
ITPEASQTGFVKPAKQFKDMNDWSSYPSCQKTTHKASSSDSTNMISFGNSKFSSRTTNQH
NGEPNFVTIKAETEEMQPLGNISFSSPPGFQSPIEELYGAIGYGEKAKKRSGSGTRTCSQ
AQEHVLAERKRREKITRQFIALSSLIPGLEKLDKSSILGGAIKYIKEIEEQKKRKCEESA
VSSKRHRLPSHDDSSSSDENFDSCSLESPPKIEVRISDENVVLIIDCKEHEGIIEEISRE
TNKLHLRVISTCSMPLGSNKLLITILAKMEEGFSMTAKDLSNNIRMTILNFI*

>g28393.t1
MGSFVVGIVLPLLLFAASLINWSIISLADLITSLLILLIGLEGSYCWKQVIVLWHLIMLS
GVVIMSHSFFHIAVAIEGDQWGLADAWWAKLFGFVRDQSRSPYAVIYFLLIHILVGLVAL
TEMYRRRTSPDSLQQSYLQNLNLSIENKGQWTIHSINIILLYVYQLPLELCAMYQWFADL
IGLYKLSSKSDWPQICSGFSIILFYFMVSSLH*

>g41742.t1
MRRILASFSIAAGGPGNARQPFISSFNHNDAAGGNSEVFVSSDSRLGRRLLFKSGDFGDN
ISKVDDPKIIYEKLCELNEKTYGTVIDGLCKAGNTGTAIEFLRIMERGKCKPNTIVYNII
IDSLCKDRMVDEALSLFSMMIDKGISQDVITYRCLIQGLCNNDWWEEAKKLWDGMIDFNI
SLDV*

>g63085.t1
MNTHRRVVREIDVDGPSNPGKINAILGANERNIAGSEDNRGIVHVEELTSTNLSRGREWE
LKENQGQGRDKIQALSEAQNQNKVFERNLESSIISINPDLDTMILEVATHSNKRDNRFGF
RIIAKTAAGSIKVVWAMVDSKNSQTTSLEVEVIRFAIIKALLEVWRKVIIQGNHKPIVDK
INVGNTQDLYAAVLLEDIIESIASFESCSFCYSNRTLNGDVPFLLGFSEIQSEYVGQMPL
VQLPYSNPKIHYETTIPEIWEDIIGRVDILVARIGIGGTISGVGQFLKERNLGIKVISVE
PLESNILSDGKPGPHKIQGIGEAIETTKQLALQEGLFVGISSGSTTVAALKVGKRPENEE
KLITVVFPSFRERYLFIALFQSIREECEKMQPEYFENFD*

>g9930.t1.1.5bbdf936.1.5bbe19fd
MWFLNRKGPSGFSSSSTAEEVTQGIDGSGLTAVVTGASSGIGTETARVLALRGVNVIMGV
RNMAAGQEVKQAIIKEIPAAKVDAMELDLSSLASVRKFASEYKLSGRPLNILINNAGIMA
APFKLSKDNIELQFATNHLGHFLLTTLLLDTMKKTYHQTKKEGRIVNVSSEAHRYTYREG
VRFDRINDQEGYSSFLAYGQSKLANVLHANELARHLKVRF*

>g26184.t1.1.5bbdf93f
MDAEHISKNSPHFIQNLVSKVENEHDVSRALSKFLRYYPINEFEPFLESLGLRPTELSPL
LPPNLIFLTDDHVLLDNFHVLCDYGIPRTEIGRIYKEATEIFGYEFGRLNMKLRAYENLG
LSKPTVIKLVTCCPSILVGELNKELVEVLDKLTELGFQRDWIGGYLSSRHTYSWNRMLAT
MTFLVEVGFDDMQIRDLIRKNPAFLLEGSGKQIYVLFGRFLKLGLRMNEVYLLLLENPEI
LSPKCAKNIWKALYFLFEIGMETENIAKLLHIHIQLLASHSLKGPKTVLRSFNGDRQKLL
QVIRENPSKFFALASKSNVSSIEQIRAKNPGKLLEKTAFLLKLGYVENSDEMGKALKKFR
GRGDQLQERFDCLVQAGLDSNVVTDMIRQAPTAINQSKDVLERKISCLVSLGYPVESIAA
FPSYLCYDIERINRRFNMYLWLKDRGAAKPMLSLSTLLACSDARFTKYFVNVHPEGPMKW
ESLKKSSLSS*

>g9747.t1
MDILPVFSSCLSWVPALWNRLALSAVLALTPSGPSRHFPDEVLIQILSKVPAKCVLRCRS
VCRRWKALTSTPDFLELHRKRSVGTIVVQQCSELEDDRISIVDEWGASKRTTKIQKISVN
SLSPASKLCYDNKFLYSCNGLLIFEDDFESTAKLTRFILLNPTTRQKMRLITPQGSIYGV
FFNPLVKDQYCVLWGGELLRQDGSMNFRIINLDSESKSKSISQTPNPNSNWKDLVHDGPV
SRQPRVKTPPLIVDDVLYWMVGCHYATSRHKTVSPGSKLIHSCSTTIIKFNTKTEEFTVM
GHPGPKDQWCKDDPEHERMHLIEIDDHGLLCLCECSMLDPTINMWILKRVDEKIASWSRW
HTVNIDIDRRRYPFYAWAQYSYRPVSVVRGELLLEWRYRGLFALNLKQGTVKRFERRLEY
ESRASMYPHHPSLLPFRYSWSEIWISAA*

>g22451.t2
MLLELPRLTNSLRDPFDVDQAYLHRKTILQNLRPPSSANSVQDSELARKIVYRWDEASGE
VRQVYKQFTGAVVELMGGEVVSEEFQEVALIVYRLFCGHSEEEEEDQVDKRIAEKKLELQ
KLVGREIPHSKLQKVALVVKRLCGLQKNDDGTVFIPERPEGQDESGDDLEFGADLVFRAP
VRFLVDVVLEDGDLLIEEIVETPHHGLWYEHGDSPNYNPSVSGRNFDLEWLREACDKIVH
ESVSQLPRDELAMSICRVLDSEKPGDEIAGDLLDLVGDCAFEVVQDLIVHRRELVDAIHH
GLFILKSDKTASSAQSRMPSYGTQVTVHTQSERQIDKLRRKEEKKHRRGTDHGVDNDLSA
MTFSSLLQASEKKGLFDDIIGRGDGAHELPVTALPQGTIRKHYKGYEEVIIPPKPTAPMK
PGEKLIEIKDLDDFAQAAFHGYKSLNRIQSRIFQTTYNTNENILVCAPTGAGKTNIAMIA
ILHEIKHHFRDGYLHKDEFKIVYVAPMKALAAEVTSTFSHRLSPLNIIVRELTGDMQLTK
NELEETQMIVTTPEKWDVITRKSSDMSLSMLVKLLIIDEVHLLNDDRGPVIEALVARTLR
QVESTQSMIRIVGLSATLPNYLEVAQFLRVNRETGLFFFDSSYRPVPLAQQYIGISEHNF
LARVELLNEICYSKVVDSLKQGHQAMVFVHSRKETGKTAEKLVELARKNEDMELFRSDSH
PQFELNKREVLKSRNREVVDLFENGIGIHHAGMLRADRGLTERLFSDGLLKVLVCTATLA
WGVNLPAHTVVIKGTQIYDPKAGGWRDLGMLDVMQIFGRAGRPQFDKSGEGIIITTHDKL
AYYLRLLTSQLPIESQHYKWSWSLDLSIPRAVTSGHISFLMLAATGRSRVWRGCGR*

>g52571.t1
MLRFEEREEVFFDTAESFSSEESFVVGEDLECHNFGYNFWLNELSSVKERRENFLVRMGL
MEGSLSNDVALNESETIEVDRVVECSGAVSTNCTSSLEETLVCNNRESNGEANFNNEECG
QEWSENLSLGTEGETTESCSFGGELGWLNKQAHVEDFENVDVKKKKIRGWLKSLVCKMKK
NRGIDASKARKVFVEDGKITLMKVQQRKKRCMELTAVYAGQEIRAHNGPIWTMKFSPDGQ
YLASAGEDGIVRVWSVSPVEASWSASACNFDSNTEGNCNNKSKKLKHASVSIPDKIFQIN
DSPLHEFRGHTSDIWDLAWSTSNHLLSSSKDNTVRLWQVGSNSCLSVFLHTNYVTCIQFN
PVNENYFASGSVDGKVRIWGVSQRRVVDWADTRDVVTAVCYQPNGNGFITGFVSGTCRFY
EVSGNELLLHADIQICGKKKSSGSRITGIQFLDNDSQRVLITSEDSKIRILDGLDVVRKY
KGLTKSGSQTSASFTSSRQHIISVGEDSRIYIWNYDDIYIQSSKAKKSARSCEHFFSEGV
LVAVPWAGVGREKGVAADDSNSACLQSHGHQDSYSLARDQDRFSLASWFSVDISSRGSAT
WPEEKLPLWEEPYPEQDSQTFDYPNNHLQQLRHQNNSQNCGNFSATWGLVFVTGGCDGMI
RVFHNFGLPIKL*

>g50989.t1
MSVAEYTLSLLHETISSPTSPTSPATPFLIDSATGHQISYSDFLNQVHSLSISLRSQLPS
LSKNDVAFILCPPSLHVPILYFSLLSLGITVSPANPLSTTSELTHLLQLTKPVIIFTTSS
ISMKLPKASQLDTILIDSPQFQIMLSNSSITFETMNKYNFSRVINQNDSAAILYSSGTTG
RVKGVELSHRNLIAVIADFYHNRYISSENSINDITHPVWLFPLPLFHVFGFFMLIRAVAL
GETLVLLGRFDFERMLKAVEKFKVTYMPVSPPLVVAFSKSDLVSKYDLSSLRLLGCGGAP
LGKELSEQFTARFPTVEILQARFSFSFSFGNIFASLLGAGVGGEWQPGAGALGIALESK*

>g73647.t1
MLTAPWLGLIPGTDGQILQSEEAGESPVVTLFKSTTAAIVSDPGCLNPKSFQTISRQAEA
ADLLYKANINTGSVLEYALAFTSAALDKYCSKWSAAPKTGFIDITTSKDFYRVFSGLQIE
YLEDSIQMQSNNQQMLGDSVAWGGCTIIYLLGQQLHFELFDFSHQVLNVAEVEAVTPSQK
NPHSLQALEGLLEAMKKARRLNSHVFSMLKARCPLEDKQACAIKQSGAPLHRIKFENTVS
AFETLPQRGA*

>g69402.t1
MADTATKPEEQHPNNNNPILGFFSNFLKLFNLPLPFLPPPPPPAKTNQPGPEEPTKKAIP
VVAAETPPKPAVVKFPRPTEDSLPSIKLEADEVEERNTNPVVLWQVYAIGGFLVLKWAWT
RWNERRERKKPSDENRPPADE*

>g69084.t1
MTDYYIQLVEVPTTLHPKFFLTEDTMVLHQTPGHAGVILYVILTGYLPFDDRNLAVLYQK
IFKGEAQIPKLLSPGAQNLIKKILDPDPHTRLSMADIKVDEWFKQDYSPTFCDDDDEENA
YIDDAVYQ*

>g50613.t1
MLMAMQSGNAAVGEKMHGGGGGDIVQQQQGRGQQWWQNHQPAGQQHLVQMDERDGFISWL
RGEFAAANAIIDALCHHLRVVGEPGEYDGVIGCVQQRRCNWNPVLHMQQYFSVNEVVYAL
QQVGWRRNQQQQQQQRGSFEGSGKLGKEYRRGGGGRGGQRWEGFKDGKEGQHAQNLRNSE
GVVVNNKEEMNGNENLESGEGRVVNGNVEEKKEPVVKPEVDSSVESAGNRLAFSSGGSED
EGKNVDYGCMSNLKGSCNVENDTHSELRSNQKQNLTVIPKTFFANETFDGKTVNVVDGLK
LYEELFDDSEVSKLVTLVNDLRVAGKRGQFQGQTFVVSRRPMKGHGREMIQFGLPIADAP
PEDEASAGTSKDRKVEHIPSQFEEVIERLVAMQIVSVKPDSCIVDIFNEGDHSQPHTWPH
WFGRPVCVLFLTACEMTFGKVIGIDHPGDYRGSLRLSLTPGSMLLLEGRSSDFARHAIPS
IRKQRILVTLTKSQPKKITSCDVQRFPSSASAPSHWVPPPSRSPNHIRHPVGPKHFGPVP
TAGVLPAPTSHPPLPPPNGIQPIFVPTAVGPAMPFPTPVGLPPASAGWAAAPPRHPPPRL
PVPGTGVFLPPPGSGNSANQSSISTSATENTNAEALSLTVKDEMEDNSKVNNASPKGSNE
KEQWEESYGGIDESDGKKSLEKEEQHHSVDLKETGKPAGAV*

>g64002.t1
MEYGSNWDYYTLINELTLGMEQAKQLRVHLSSAPSEPQELLLQRILSSYEKALLILKWNG
GSVGQSQPTPLASGAPESSISVEGSPQSEDVKKNFNDYHDLRDISKKRKTQPTWTELVRV
SPENDLEGPANDGYSWRKYGQKDILGAKYPRSYYRCTYRHMRNCWATKQVQRSDEDPTVF
EITYKGTHICNPTANTSVPLPSPEKQELKYSYNHNNHQPQQPNQMLMNFRANLRVNTGNS
ENKEIVSLFSFPSASTNMEGENQLFPISTLVDDNLLGTYSPSFISPTTSGSNYFSMSATA
SATNSPIAGLDFSIDSVALDPNFPFNTPVFFT*

>g63504.t1.2.5bbdf941
MQQILTVEDVATQIKPHGFWLNVQHHAFYSQHKLSMRSFVISVSRRLLVNYISSPEVNFL
KSMVAHFKPRLTKLVFRFLGPAEIEPSTNQTYGSILKNLTFIKTFASGILVPKYYIWPVD
SSQYLQPHTSIVLDAHKEGLEVYASEFSSDVPFAYDYNYDPVAEYLSHIDNGNFSVDGVL
SDFPITPSEAIDCFSHVDKNETEQAKLLIISSEGASGLYPGCTDRAYDQAIADGADIIDC
PVQMSQDKIPFCLGSINLNKRTTAAQSPFTNLTMTIPELNIQDGIFAFNLTWNQIQSLKP
SMYNPYTNYALYRNPKSANVGNFVQLSDFLAMARNTTSVSGVLISIEHAAYYAQNQGLSA
VDAVIDALTKAGYTSQSAKKVMIESGDSSVLEKFGKMSNYELVYKVDKTISDITNSTIVE
IKKFASSVLVTKGSVFPTTEAFLTGITEVVPKVQKFGLPVYVQLFSNEFVSQAWDFLSDP
YVEINTYALQMGIAGVVTDYPATPARYRRNWCLGYKTLPPYMSPIQPGSLLQVIAPSLLP
PAKSPDPVLSELPLPPVVERHPSTGTGEGSTKPGPAPPVGESTTVANTFLSSLATILGEI
PKLARNWKILP*

>g4685.t1
MMSELGTRPMLGSNENSFGDEFEKEIGLLLREQRREDADDHEKELNLYRSGSAPPTVEGS
LSAVGGLFNNGAGGGGSGPAFSEFAHNKGVNGFMSEEELRSDPAYLSYYYSNVNLNPRLP
PPLLSKEDWRFAQRLQGGSSAIGDRRKVNKNDSCAGARSLYSMPPGFNSKKQETENDSDK
VQGSVEWGGDGLIGLPGLGLGTKQKSLAEIFQDDLSHAASVSGHPSRPSSRNALDQNTDP
LGPAEAELAQLHRNLTSTTSVQSASAAQHVGPPTSYSYAAALGTSLSRSTTPDPQHIARA
PSPGLAPIGGGRASTSEKRSTNSSNSLNVVSSHTNDSVDLVAALSNINLSNGVVDEENRL
ASRIDHDVDKNKNYLFNLPGGRNNSKQHGYFKSDSGLSNSSVQDLNNSPLQTESRKTAVL
RNNSYQKGSSTSMLNGGGGLFSQYQHMDSPNSFSNYNLGGYTVNPVTGNLGNNLPPLFEN
AAASAMAVPGMDSRILGGSNIGSPVSEHNLSRMGNQMAGSGLQSPYMDPTYLQYLRTADY
VATQVAALNDPSTDRNYMGNSYMDLLQKAYLGAMLSTQKSPYGVPAGTKNTGSNHHGYYG
NHAFGVGLSYPGSPLASPVIPNSPGAPGSPLRHNDFSMRFPSGMRNIAGGVMGPWHLDNL
DSSFASSLLEEFKSNKTKCFELSEITGHVVEFSADQYGSRFIQQKLETATMEEKNMVFEE
IIPQALTLMTDVFGNYVIQKFFEHGMAAQRRELASKLFGNILTLSLQMYGCRVIQKAIEV
VDVDQKIKMVEELDGHVMRCVRDQNGNHVIQKCIECVPEDHIQFIVDMFFGQVVTLSTHP
YGCRVIQRVLEHCIDPKTQSKVMEEILGSVSMLAQDQYGNYVVQHVLEHGKPHERTAIIQ
ELAGKIVQMSQQKFASNVVEKCLTFGDPNERQLLVNEMLGTTDENEPLQAMMKDQFANYV
VQKVLETCSDQQRELILSRIKVHLNALKKYTYGKHIVARVEKLVAAGERRIALQNPHPA*

>g13561.t1
MGEIQHKPHALFLPIPLQGHVIPFVHLATKLASNGFIITFVNTESIHHQITNSQNQTTDH
EQDGDLFAEARKSGLDIRYATVSDGYPLGFDRSLNHDQFFAGFFHVFPAHIDELVGKLVQ
SDPPVNCLVIDTFHFFASSIAKKHNLVHISCWTEPALVFTLYYHLDLLRINGHYDTFDKR
EDTITYIPGVESIKPTDMPSYLQTEPTTISHPIITNAFADVRNADFVISNTIDELELQTI
SALQEKQTFCSIGPIFSSGTTKSSVATSMWPESDCASWLDSKPDGSVLYVSFGSYAHTTK
HDIVEIAYGLVLSEVNFVWVLRPDIISSVETDYLPTGYDRLIESRGVVVPWCSQNAVLSH
PAVGGFLTHCGWNSVLESIWSNLPMICYPLLTDQFTNRRLVVDDWKIGVNLCDKRSITRE
EVAEKIKYLMNAKSSNDLRQEIKKIKMTLENALAKGGSSQKNLDRFVRDVKACIWKSQ*

>g22708.t1
MSWQTYVDEHLMCDVGEGSTLAAAAILGHDGSVWAQSESFPQLKPEEVSGIMNDFAEPGF
LAPTGLFLGGTKYMVIQGEAGAVIRGKKGSGGATIKKTGQALVIGVYDEPVTPGQCNMVV
ERLGDYLIDQGL*

>g14487.t1.2.5bbdf93c.1.5bbe1a03
MPIAWTSSPDAVPFLGVQRSDSMFGAHDSQASQQVYVDCIPTKLNRKLWPSCHPEEIKSE
KVLMGIMHSSRPHYGLQFHPESVATCHGRQIFKNFADITRDYWFRFRSSSSRERQVYDAC
MQVPDVSRLFQDVVSKHLVNKTDKANHFNLHKTAKLKHLRNDVKFLKLRWRKLASLASRA
GGARNIFCKLFGDCKAENSFWLDSSSVEKGRARFSFMGGKGGTLWKEVTFRLSNQSDAAF
KSGGYLSIEDAQGCTQSIFLEDGFFDFLNKELQSFCYDKKDFEGLPFDFYGGYVGYIGYD
LKVECGVGLNHHKSRAPDACFFFSDNFLVIDHLKDDIYILSIHEQSTCESTWLDDVEQKL
LKIDSCATKNLMFQTSQGSIHDPLKSGFSVEKSRGQYIKDINKCQKFIKDGESYELCLTT
QLKKKIGEMDPLGLYLNLRERNPAPYAAWLNFSKQNLCICCSSPERFLRLNRDGILEAKP
IKGTVARGATEQEDELLKLQLQYSEKDQAENLMIVDLLRNDLGRVCEPGSVHVPHLMEVE
SYATVHTMVSTIRGKKQANVSAVDCVRAAFPGGSMTGAPKLRSMEILDALESCSRGIYSG
CIGFFSYNQTFDLNIVIRTIVIHEDEASIGAGGAITALSNPDEEYKEMILKTRAPTNAIF
DTERGSHTV*

>g14325.t1
MFSGKACLGEILYRYIIADQFSPECFIDHLDLSSEHNRLEIANKIEAALHIWRQKYCKKN
FDHRRTRRSQWNGSFKGFVDIEKAKISAQRADTLLKNLKLHFTGFPQTALERTKIQYNKD
VGQSILESYSRVIESLAFNLMARIEDLLYIDEATRLRAAEESISIVSHRGLTGDFTLQKQ
IHSGPVSIQLNSCSSLLSKPAFCSGAPLVRKLKRIQASPKNMLNEKLERFTF*

>g75150.t1
MMIDQCILGGFLASLLGLVLLYSQIRGKTKKHKPSSASKAEFKDDYVKTSVNVDRLSEDE
QKTDIIIVGAGVAGSALAHTLGKDGRRVHVIERDLTEPDRIVGELLQPGGYLKLIELGLE
DCLRDIDAQRVFGYALYKDGKDTRLSYPLEKFDSDISGRSFHNGRFIQRMREKAATLPNV
RLEQGTVTSLIEENGVVKGVQYKTKNGQEVTAYAPLTIVCDGCFSNLRRALCDPRVDVPS
CFVGLILENCQLPYLNHGHVVLADPSPILFYQISSTETRCLVDVPGQKVPSISNGEMAKY
LKTVVAPQVPSQIYDAFIAAIEKGNIRTMPNRSMPANPHPTPGALLLGDAFNMRHPLTGG
GMTVALSDIVVLRDLLRPLHDLHDPSTLCKYLESFYTLRKPVASTINTLAGALYKVFCAS
SDQARKEMRQACFDYLSLGGIFSSGPVALLSGLNPKPLSLVLHFFAVAVYGVGRLLIPFP
SPKRVWLGARLLSGASGIIFPIIQAEGVRQMFFPATVPAYYRAPPS*

>g27348.t1
MTKRTKKAGIVGKYGTRYGASLRKQIKKMEVSQHSKYLCEFCGKYAVKRKAVGIWGCKDC
GKVKAGGAYTLNTASAVTVRSTIRRLREQTES*

>g58492.t1
MSDDDEAQFLNLPYHLINDILSRLPTRTIVHCKCVCKTWLNLLSESEFINLHLSRSPPCL
LVHKLHASSSDSICFSLVEFEDEPDHHDFGYVAENKIKPPMICAEDGMDVTVIGTINGLI
CLHEHGHRHHELYLWNPSIQEFITIPETEEVRWCFDTVSYAYAFGLSSQTGQYKVIRIIQ
ELDKNTSRVLKSNCDVYTLGKENLGLGLWRRIENASFIFSFWSYGVLLNGFLHWLISEDG
NILGGPDSLSCFDLQKELFLPFPAPPELSKDRNVASLGVVGGCLTLCDNSFEYEIVIWVM
KEYGITKQWSKGIVIGMEPPDQFLSLDEEVVQVLKIFEDGDALLLWGDDCLLSYDSRRKI
LHQSTVHRLLHDDDMNEEDFVEAMEYVSSFISFKNFGIETNQKGKTNKRKEMVESIN*

>g53429.t1.1.5bbdf93a
MFKKKVTFLRIMVLLWADMLAAYVMWIMQTYLTDVWKLGFAHAAGIINVYTGLTKFVPFF
FFIFVDAGLGNYWILLLSSIAFSIGLGFLSMSTPPVLSKATGTCKAYEPNCLGHTQKALF
YTALALIAAGLSGHVVSLVAFADNQFEKKPDKPKDTKPKYQSSKSFFDKLKRGTDVNFAS
MPSLRALSFLGKSRQRKKQQADSASDTQVDLSELQFQPLEAMLALVKRERIKLFRACLII
LIPVIGLIALPYIKPWSLRFGIPAICTLVATLAFLAGTPWYKEESKPEGIPVTNVFRVFV
ASACNMFQDPKQYPELYEKQQPDIPKLPHTTGPLRFLDKAAIPLESETKEPEKYRWRLCT
RTEVEETKIIIRMIPIWITFVLCGLVSSIGNTYFVEQANHMNYKVGKLKFPNSIILVLYE
LAKSQWKGFYTAIENCLRKGKKKYAPSVGITIATVFSVLCCITAAKIETHRIHVIRSHGL
LDKPANKIPMSVFILLPQYFLLAGLDSFYENSVVPFLTDQSPPSMRKYLVYLNPGLSGLG
VVGSVLSVYVVGKISERGGKQNWFQHTLNQSRLDRYYWVLAAISAVNFIWFVFVAMWFPL
REPDDGENGENDEENAGNAEEAGNQENEGRTGNEGWIATTVNIFTETAIVNIKQSDNA*

>g19937.t1
MMISRGLFGWSPPHIQPLTPSPYVDPTPDAPPAEVEEEIDDEAEEIEPTAAALLRHGSEP
ADDLFDKFTEVISSDFTVLFSRDWPFYGNC*

>g5916.t1
MQEFNYRTPTGNNFKIRHWSTTKIPWQPLGQIVFIERANFVKQPELLFEIRKMGSGPNTC
FLRDTSSGLEQDRARKTGTERDWFCRKIGDRLTNLTWDRKWNQLLPDSSQSITLL*

>g16533.t1
MGGCVSMPKKRFKSNAKYFRKPKKFRRKIASSVSVAPIEHFTGAENGRYSSLPEFVSGNN
KTHARTSCRSSELPNLTFHCSQPQWDHNQVTVNGMCQEEAWFDSVSALDSDSDEDFTSVH
GDFFPSLGNTTEDMCMNEMAQHESNSFFVGSGHTSDENFQNIDDCKSEMVFGKVENEETN
GLYHLKRSDDFPRSTKADGMSTEKKKIPDAPCGSFEGLKMDAWHCEEKNEGNNQKSHLPQ
LLDHCSLNSVSTSKRRKSTAIKVSIKRTPHDGDEMTEFCPFKRNLYHRKAGLTIPRSMDE
NLAHGCWHPLLSSVFKLRGENYFRDKKKHPAPNYSPYVPVGMDLFACHRKIHHIAQYLEL
PLVKAHHEVPSLLIVNIQLPTYPASMFLGENDGEGMSLVLYFRVSENFEKEISMEFQESI
KRLVADDMETVKGFAKESIIPFRERLKILVGVVNPEDLRLNSAERKLLHAYNEKPVLSRP
QHAFYKGANYFEIDLDVHRFSYISRKGLDAFRDRLKYGILDLGLTIQAQKPEELPEKVLC
CIRLSKIDFENHGQISEIVVHGND*

>g5395.t4.1.5bbdf93d
MQHMDVKSDTSPDTAKTFVEQYVSKLIESQSYMEAVAILEHFSIRLSGESFLLQRLQKKE
FRAAERWATFMGKPVLLVLIQEFINKNLLKPAYDIIKKNNLCQEFPEVCQQYKESSIKKL
AEHGQWDIAEVKTKGNKQLLEFVVYLAMEAGYVEKVDELCKRYSLEAFKNVKKTEVNLKN
SGYLHLDDFCIEDVVWVDEKNGLYDATCHLVECKFVGLDCEWKPSYEEGSAPNKVSIMQI
ASETKVYIFDLIKLYNSVPGSLDKCLSCIFCSSRSLKLGYNFQSDVKQLIHSYQDLRCFK
RFEMLLDIQNVFKESRGGLSGLAEKVFGRGLDKTRRNSNWEKRPLSIYQLEYAALDAAVL
IHIFWHVPDHVKSADVSTLMWKSNIVSRFPHGQS*

>g60434.t1
MLSSQQTNINHSSREKFIFDTKSPGFQQFPPFSLFSNFPIFIYKRVFFGGCSKFLLHCAY
SNQDKFLRLNDQWSLKVGRRSLVVVSPYSTKRPLDTALRTYDLPEGSRNSDLLLTRTAPG
SHPEIPSLVV*

>g16697.t1.1.5bbdf939
MSSFMPKPAIVNQQLHSLITLAPLHKNLSFSFKSRILSSLPILQPYCENPSNPTSYQVRF
FSSASRSSLLMELVKAVANKGSQTGQCIAIRSEQKSYTYLQLMSSAWRISSLLCNGDLKT
ADDLKGNKHLGGTRIGIIAKPCAEFVAGILGTWLSGGVAVPLALSYPEAELLHVMNDSDI
SMILSTEDHQELLKNVAAKTAAQFSLLPSVPSTSPSAVLDQMGNGPIDVNGHLQGPENFY
KIEDEDPALILYTSGTTGKPKGVVHTHKSILAQVQILANAWEYSPNDQFLHCLPLHHVHG
LFNALLAPLYAGSAVEFMPKFSVRGIWQRWRESYPSKETKVHDAITVFTGVPTMYARLIQ
SYEAMDPELQVVSASAAGQLRLMMCGSSALPVPVMQQWETITGHCLLERYGMTEFVMAIS
NPLKGARKGGTVGKPFPGVQVKILSEDGSEDDKTGVGELCIRSPSLFKGYWKLPEVTEES
FIDGGFFKTGDAVRVDEDGYYVILGRTNADIMKVGGYKLSALEIEAVLLEVTACLNLCA*

>g76109.t1
MNPHDKLKNPGFSSSISPPASQPLPVPPGSQTSEILPTPISVPSPSSSAQLRPEFSTFDP
QLFPLPMASPFTDLESFQDLQETLPNSVRGGNQEAAERFSGVPRPLECLQGTPIPPFLSK
TFDLVDDPALDSIISWGASGRSFVVWDHVEFARRILPRNFKHNNFSSFVRQLNTYGFRKI
DADRWEFASEGFLRGNRHLLKNIQRRKCHQSQLVGSSSGISTEAGKIGLESEVEKLRKER
SLMMQEVVELQQQQRGTIQRMEAVNEKLQAAEHRQKQMVSFMAKLFQNPEFLDRLKQIKQ
QKQITSPRTMRKFLKHQQDETGKAESSLEGQIVKYRPDLHELDTSSVTPEFNPVAEERLP
KFPLQGVGENVCLESDIIPFQVENFAANFAVDEKVLVPEFLKTSELSVGDFTNQGTEDPL
FKGKNVVPTEVNPEYFISSPDDLATEKNFPSFSSPGIESMLKNQESWSMDIEPAAGMSAS
SIELWNNAANYDIPEPVVSSELSDFWDLGSLYAAGSSGEDKRPSNESPFGELDEKVRQHK
DDSSKKLDL*

>g19952.t1
MAILLKQILLFPILPISLLSLLLFCLFTNGHHLHGYPFSPLSSPFPPPPKIACLSPVLGM
MAQESSGFFKPRLGLLASDEHRDQLARMVVSVEIFVASGNVNVMEKANPVNEEGFSPLAL
ILHGAAILLRWKEDWDCSGWYVPSNLICLS*

>g62964.t1.1.5bbdf938
MAVALTMGGSVLSAFLQVLFDRMVRPEFVNLFRKRKNDNELLEKLRRTLKVVGAVLDDAE
NKQTTNKAVKEWLDDLHDTFYQAQDLLDKINTEALRLEIETEYPRSPTNKVIASTCTLSL
INDFLNDIMPEIEKIVLRLVEFKQDIQRLVGIGGIGKTTLAQMVYKDVRVETLFSTKAWV
CVSEDGIPLKKLPLQMGELRNLQVLTTFLVGKEAGSMTEELGKLPKLRDWLGNPSFCRLE
SLSLSSCEYCFCLPALGQLPSLQSLEIVGMRYISALAEEFYGDASVIKPFQSLKKFRIEK
MPGRENWHIPKCEAFCSLEKLSIIDCPKLTGELPKQLSLLQILEISGCDRLVLPNGRLSI
FNEDVQQLSSLCELKISALMNLKELTGLNKLSSLVCDGCVNLKLESEGYHGGSLLEFLKF
DNCDSLKVVPFGSFSMLKRFEILQCKSIEMLLIPSHGIGNQSNVLTSLQYFEICGCDELV
SFAEGGLPVPNLMRFFVINCKKLKSLPERVESLLPSLYVLHISDCPELVCFPEWGLPSSL
KKLCIYDCEKLMSRRMEWGLRRDASLIVLDINGIHEVESFPDEDWLLPCTLESLCFENKI
KTLNYSSLLQLTNLKYLSISNCPLIQSLPDKGLPTSLNKLLIWNCRLLRPRLEWEKGQDW
PKIAHIPRVIIDQELFP*

>g55128.t1
MACFKGLILLYLALLLVTELEIAYSNLSCTAIEKEALSDLRRGLVDKANRMSSWKGDNCC
AWEGVGCDKRTGHVLKLDLSNPVSFDSERYFDDKDYFANFSLNRLGGEISPSLLNLRYLQ
SLDLSMNNFSGTEIPTFLASLKSLEYLNLSSAGFGGKVPQDLANLSNLKYLHLGYAPSVS
YSFRIFVEDYGLNIDSLRWLSEFSSLKSLDLSGVQLAEANDWLDSINKLTALDSLNLAGC
GLATFPPISHINLTSLTSLNLQRNNFNSNIPIWFSNITGLRQLHLDHNSFGGLIPHSIEQ
LTSLIVLDLSYNFFAIPLPNSLCRLKHLVQLDLSGNYFQGTVPYCLENLTSLAILDLEAN
NFEGSFPDSIYSLCSLRVLDMSLNQFNSSLPTLFRASSGCLLNSLKELYLVSSCIYGYFP
SHLKIYRNLEVLHVSFNSFSGPIPFELGRLSHLKELDISNNKFNGSVPPSLGQLSNLTKL
DISSNSLTGALYELHFEKLTKLKHLSISSNSLLLKVSSQWLPPFQLQTIDLASINVGPCF
PSWLQTQGSVKRLIMSNASISGTLPNWFENVYSRIDDLDLSHNDISGQLPTFGESHRPLR
VIKLNSNKFEGPISTVPSEVYLLDFSENLLSGPLPLVDDVNRSVNHLLLSDNRLTGEIPL
TICAIRSLIVIDLSANQFSGTIPSCLANLQNLQVLDLSNNSLSGQIPSSLSFLVQLHALH
LQQNKLEGKIPSSFSNMKSLRTLDLGNNRLKDIIPPWIGEKLQGLIYLRLHANNFYGGIP
LQLCQLEFLKLLDLSENKLSGNIPHCVNNFSAMIFDVPEVCYYIRFLYYFDQQIQAFTKG
MEQKYSRNLPFLKMIQLLENNISGEIPEEVLDLVGLNNLNLSGNHLQGRIPEKIGRLKNL
ETLDLSRNELSGPIPISLSAISFLSHLNLSFNKLSGPIPTGNQLQTLDDESIYEGNDGLC
GAPLLKSCPDEKSSDGDEAMEDVDGENELVSLWFYVGLGTGFGFGFVIVCCTLIFLKSWR
IALFPLLDNLTNRRRVS*

>g68923.t1.1.5bbdf93e
MIGVANKSLIVRGTPKLNFGESTGLSLWKSGFLKLPVSFDFCRNNNNKGLGSVGPEVRLS
FLGPIKAMEGSRTTSSSSYINGKVASFPAFPLSGCNSDDDIIVNDCKDTLKTSTVGNSTN
IAWHECSVEKSDRQELLHQKGCVIWITGLSGSGKSTLACALCRGLHARGKLTYILDGDNV
RHGLNRDLSFKAEDRAENIRRIGEVAKLFADAGVICIASLISPYRKDRDACRALLPEGSF
IEVFMDVPLQICEARDPKGLYKLARAGKIKGTFPKSC*

>g63924.t1
MLVDRETWSTKNHSYLITLYQLTPFRYLIIIEMEAVQVEELTSGASGRIIPVFKNVRRSV
LSYDAVCRGLILVKSLFLWIILLLLPRCHRSPPSSAADSASEERLMKKRKFRKDEEDTLR
RRALAEALQMVAADTRACAGPGTGMGTESVSETGNGNGRCLWSTSLFYGVRRNALFCRSW
LPVSGELKGILIIIHGLNEHSGRYADFARQLNSCNFGVYAMDWIGHGGSDGLHGYVPSLD
HVVADTGAFLEKIKRDNPRIPCFLFGHSAGGAVVLKAASYPHIEKMLEGIVLTSPALRVK
PAHPIVGAVAPLFSLVAPRYQFKGSHKRGIPVSRDPAALVAKYSDPLVYTGPMRVRTGHE
ILRISSYLMRNFKSVTVPFFVLHGTADKVTDPLASQDLYNEAASEFKDIKLYDGFLHDLL
FEPEREEIAQDIIDWMDKKLSLGKLEKVIY*

>g42563.t1
MGTEKGGNLVAYIIVPRLVSGRILIVICFKEVINNRTIYFRDGSYASKACKDVSAVEYLL
DAPAYNVSEKPVTFVEGFSYNVCILAGPGIAAAAAFAVFNKFIFQPKECNI*

>g50069.t1.1.5bbdf933
MASTTSFAGVQIHISPSSYTSRASLFSPPAPLSVNFLAKPKALRNLNSLKLRRKDAFLTR
RSEHFGRRSRSFVVRCDASNGRQITQQEFTEMAWQAIVSSPEVAKENKHQIVETEHLMKA
LLEQKNGLARRIFSKAGVDNTRLLEATDKFIQRQPKVLGESAGSMLGRDLEALIQRARDY
KKECGDSFISVEHLVLGYVQDNRFGKQLFKDFQISRKAIKDAIEAIRGRQKVIDQDPEGK
YEALEKYGKDLTAMAREGKLDPVIGRDDEIRRCIQILSRRTKNNPVLIGEPGVGKTAISE
G*

>g9522.t1
MVTAICLSYSSKPSTNENLPLWRPKASKSIKNHDVAIKQRNPKSVGNPQKMAKGLKSSVK
LTRLARRLRGQLDTGCFGDAVNMFDNMNYRTTYLWNVLIRGLTNKELYQEAIDFYYRMEL
ERVGVDNYTLPFVIKACVGLFSLVDGQKIHSKVIKMGLDADLYICNSLIIMYSKLGCIQQ
SEKIFADMQLKDVASWNSMISGYVSSGDCISSFRCFRDMQAAGISSDRFSMISMLSACSL
HGCLLNGKEIHCQVIKRGLNSDSMIETSLIDMYGKCGLVDYSQKLFNEVSQRSVTVWNAI
IAAYSLNDDPLKSFSCFKRMQESDNLDPDAVTLINLLPSCARMRALMQGKSMHGFAIRRG
IVPHLVLETALVDMYGKCSSPNLSKHIFVHMKGKNLISWNAIIAAFVQSSREGEAIRLFQ
DMCKEHLDPDEITFVNILPAYAEIALPKEGQQIHGNIIKLGFSSSIFVCNSLIYMYAKCG
DVQAAEKVFNCMMYKDVVTWNTIIMAYGIHGFGEISIRLFSNMMEEGIKPNASTFVSLLS
SCSIGGMVDEGHNYFNLMKTEHNIDPGIEHYGCMLDLLGRSGNLDLAKDFIDEMPIVPTA
RIWGSLLAASRSHRNVELAELAAERILSIEHDNTGCYVLLSNMYAELRRWAEVERIRCHM
KSHGLRKTTACSMVEYKSKTIQFTSNDCSHAVASMIYGALDVIWRQTGDYLYVYRASKFR
PPDLIRRRANSTVRHSVRLAICFGLLSTSIGTPVLVRKNVRICEDCHNAAKKISRITNRE
ILVGDPKIYHHFRNGQCSCKDYW*

>g26949.t1.1.5bbdf940
MRSANCSPVSYPILPPTHQHHMWDAWDMAAEICLSQLPTLVKDPNAEFQPSPFFTEQLTA
FEVWLDHGSEHKKPPEQLPIVLQVLLSQCHRFRALVLLGRFLDMGPWAVDLALSVGIFPY
VLKLLQTTTPELRQILVFIWTKILALDKSCQVDLVKDGGHAYFIRFLDSVEAYPEQRAMA
AFVLAVIVDGHRRGQEACIEAGLIHVCLRHLQGSSSNDSQTEPLFLQWLCLCMGKLWEDF
TEAQMMGVQADAPTILVPLLSEPQPEVRAAAVFALGTVLDVGFDTSRDGAAGEEDCDDDE
KVRSEASIIKNLLSVVSDGSPLVRAEVAIALARFAFGHNKHLKSVAAAYWKPQSNSVLTA
LPSFAVKGSGSGYTTPTQYMPHGSIVPSTVSPLLRIGENVQSVVRDGRVSTSSPLATAGL
MHGSPLSDDSSRHSDSGMVTDSISNGVVHHARPRPLDNALYSQCVLAMCTLARDPSPRIA
GLGRRVLSVIGIEQVVAKSVKTTPGSAQHSESTANPSTSVTGLARSSSWFDMNGGGHLPL
TFRTPPVSPPRPSYLTGMRRVYSLEFRPHLMNSPDSGLADPLLGTAGSSGASERSFLPQS
TIYNWSCGHFSKPLLTATDDSEEIIARREEREKLALDRIAKCQHSSVNRLHNQIASWDTK
FETGTKTALLHPFSPVVVASDENERIRVWNYEEATLLNSFENHDYPDKGISKLCLVNELD
GSLLLVASSDGNVRIWKDYTSKGQQKLVTAFSSIQGHRPGVRSLDAVVDWQQQSGCLFAS
GEISSIMAWDLDKEQLVSTVPSYSDCSISALSASQIHGGQFVAGFSDGFVRLFDIRTPEM
LVSATRPHTERSERVVGIAFQPGLEPGKIVSASQAGYIQFLDLRCLKDAYLTIDAHRGSL
TALAVHRHAPLIASGSAKQLIKIFNLEGGPLGSIRYYPSFMAQKIGSVSSLTFHPYQVLL
AAGAADACVSIYADETYPAR*

>g59886.t1.1.5bbdf940
MDGRGSISFNAEQRAVPTTITAALASAVLEWFLIFLLFIDACFSYLVTKFACYYELQIPC
LLCSRLDHVLGKEKPGFYWELICNKHKLKISSLVLCRLHNNLVDVHGVCDACLFSFATVN
KSSAETYRLLVGKLGDEPHIGHDHDLLIADRSLGKCFCCNEQWISTGQTRMSFLTKSIGY
EANDLDAPILATNAHGRDEGEGTRKFSSQKTRMCNTEKKIVDPLPHVEYEKVKMTADTES
EASTSDDDSTTNLFCVTEQGKKDLVADYKEEDLPVGFLASEKLIDPDAASEPSLLKSEVQ
VEASHSHCTASAAPIGHVSEELNQQHVEQKTPSELISSVEVTTSSEVIDSSVDESRDKLH
VVGVAESGEAVENSCEMAELQSKSISTNEKESDLKTGTSETVFQMPSSLELGDAYKLAIG
SRGRQLSGKLFDQKSFNDSTRMSEDLKLLLSQLSAARGIEVPLYDISPRISGSIDECRNS
DTSSSVGIQMLQRRISLDRNESGISLDGSTVSEIEGESAVDRLKRQVERDRKLMSALYKE
LEEERSASAVAANQAMAMITRLQEEKAALHMEALQCVRMMEEQAEYDGEALQKANDLLAE
KEREIKDLESELEAYRKKLNDLPLSEIVIESNCGLNRGETRQNSAYIGSTETNTSTCNSN
SSMPDPCLETDKAAKITRDEDINMKDSQLDFEDETLFILQCLRKLEKKLQLFSSNEALLD
VANGDDLSLGEKVRVGNCEHPNGSIASPKNDKTEVEGSPEHATWHEGSISAPEKSGGQYE
DAQELCKGSGELKHGTHICENAELEALRNEFLVLSGRLDALEAEHSFLEHSINSLSRGGD
EAIKFIQEVACQVRELHSIGFKRRN*

>g12071.t1.1.5bbdf938
MGNEQKENNNKNVEFEIIVVDDGSPDGTQDVVKQLQSVYGEDRILLRARPKKLGLGTAYI
HGLKHASGNFVVIMDADLSHHPKYLPNFIKKQIETGADIVTGTRYVKGGGVHGWNLMRKL
TSRGANVLAQTLLWPGVSDLTGSFRLYRKSVLEDIISSCVSKGYVFQMEMIVRATRKGYN
VAEVPITFVDRVYGSSKLGGSEIVEYLKGLVYLLLTT*

>g48810.t1
MAEDTLASLRSLMASHSPPLNALVVPSEDYHQSEYVSARDKRRAFVSGFTGSAGLALITM
EEARLWTDGRYFLQAAQELSDQWKLMRMGEDPPVDTWMADNLPKDATIGVDPWCVSVDTA
QKWVRAFNKKQQKLVQTSRNLVDEVWKSRPPPEINPVTVHPIELSGRSVAGKLKDLREKL
VQEKARGILITTLDEVAWLYNIRGTDVSYCPVVHAFAVVTLNSAFFYVDRRKISSEVSSW
MKENGIEVRDYGSVTSDVALLASDQLTPSSSANFAKADSMDFNSAEKGIIDKNTGELGGN
SNDLIWVDPGTCCFALYSKLNAEKVLLQQSPLQLAKALKNPVEMDGLKKAHIRDGAAVVQ
YLVWLDKQMQEQYGASGYFLEAASINKKEMNTTRLTEVSVSDKLEQFRASKEHFRGLSFP
TISSVGSNAAIIHYSPDAKSCADLDPNSIYLFDSGAQYLDGTTDITRTVHFGKPTTHEKA
CYTAVLKGHIALGNARFPSGTNGNTLDVLARIPLWKDGLDYRHGTGHGIGSYLNVHEGPH
QISFRPSARNVPLQASMTVTDEPGYYEDGNFGIRLENVLIIKDADTKFNFGDKGYLAFEH
ITWAPYQTKLIDLSLLVPEEIEWLNDYHSRCREILAPFLDEFEKAWLKKATEPVCV*

>g66613.t1
MSVTWERPPKGFYKLNTDASAINNKASGGGVLCDSTGRVIFAFLKEFGDVNVLMAEAMAL
EEGLTSMEQRDLSFILIEVDSKVLSGMLKNEHTRVWPLCLILTRIH*

>g38262.t1
MELSVPLPTRYLVHSLSSSSSHLEQPKKTTINLSNSTLIFSSNQKSSLFSTTHHHHIKNR
PFTPFSISMDPRGIIPQAFENGSPPTSSEMGRAGEVKRVTKETNVFVKMNLDGNGVAENS
TGIPFLDHMLDQLASHGLFDVHVKATGDYHIDDHHTNEDVALALGTALLQALGDRKGINR
FGDFSAPLDEALIHVALDLSGRPHLSFDLQIPTERVGTYDTQLVEHFFQSLVNTSGMTLH
IRQLAGKNSHHIIEATFKAFARALRQATEYDSRRRGSVPSSKGVLSRA*

>g7504.t1
MRLSDSFESLHVTCAPFVFTRKVLFSLVRFHSFWSQKPDIKTFVSARKLSPTQVSLDPYT
TITSTYMSPSQVPSMSDSSATDWFFTCTKIKFFTKIRRFLPLKARKKRFKPSDHPEKLRV
ISVSGKEGKKEEGMEKESEQDSWMVFQRSVKGLHFGSWEEKELAVKEIKRLAKEDLKRRK
SMAELGVIQPLVDMVESQVAERQRLAVQALIELANGSFTNKLLMLESGILSKLPTKTDFL
DEPARQDFAQLLLSLSSPSNIQFSVSSARIVPFVVSVLESCSSIETKVVCLGTLYNLSSV
LGNAGQLVTSGVVNTLLSLSSLGETSEKSLAILGNLVATSTGRKALESNPTVPENLIEIL
AWEEKPKCQELSVYVLMILAHQSSVQRQKMAKAGIVPVLLEVALLGSPLAQKRALKLLQW
FKDERQKRMGPHSGPQVGRLLIGSPVNKSDVDHGKKLMKDMIKQSLCKNMETITRRANGD
EDRTRFKALVISSSSKSLPY*

>g23095.t1
MVMQAGNGTGGDCREMRNFGLHLLTSRWFTLFASLLIMSVNGAAYLFGVYSNDIKSTLGY
DQTTLNLVSFYKDLGGNLGIISGLINEVCPPWVVLAIGAAMNFFGYFMIWLAVTGCTAKP
HVWQLCLYIFIGADSQAFAHTGSLIATVKNFPGSRGIVLGLLKGFVGLSGAIITQLYHAL
HGNDTKSIILLVGWLPAAVSVVFLPVIRFIKVTKQKNELNIFYSILYISLGLAGFLMVVI
IIQNRLTFSRNEYIASAIAVLILVFSPLAVVAKEEFSTWKSMRLSLRSDDNSHSPQLGAV
EVEPTATIPQADEVVPTLSRKKKIDWMKNVFHPPEIGEDYTILQAVFSMDLLILLISTSC
GIGGTLTAVDNLGQIGKSLGYPSNSITTFVSLVSIWNYLGRVAAGFSSEFFLTKYKFPRS
LMLTFVLLLSGVGHILIAFAVPNSLYIASLIIGFCVGAQWTLLFTIISEIFGLKYYSTLF
QFGAVGSPIGAYVLNVKVAGQFYDKEARKQMTAKGLTRQVGQDLTCSGVECYRLSFIIIA
AATLFSCVISLILVIRTRAFYKGDIYKKFRDDPKPAEIQELGIEASGRSITEPSLKLTVY
AETSKKITNS*

>novel_model_113_5bbe01de.2.5bbe1a04
MAASLSLLACKPSFISSFTSSLTLKPTHQISAKMALNNNTTTSNMSSSYNIRSRRKLPIL
LFDVMDTIVRDPFYQDVPAFFRMSMKELIECKHPTAWIEFEKGLIDEPELARKFFKDGRS
FDLEGLKHCMKRGYFYIEGVEELLHALKKNGYEMHTFTNYPIWYKMIEDKLKLSTYLSWT
FCSCTFGILLLRFFPTLCSVSMCLTCRIY*

>g28216.t1.1.5bbdf93f
MSGGGEAEGTTLEFTPTWVVAAVCTVIVALSLAAERFLHYTGKYLKHKNQKPLYEALQKV
KEELMLLGFISLLLTVFQGSIVKICVKESVTLHLLPCSLPKESSSSEGGSSHASPESTTA
HRRLLAEGSANAGYCAARHKVPLLSVEALHHLHIFIFVLAIVHVTFSVLTIVFGGVKIRQ
WKHWEDSIAKDNYDTEKVLKPKVTHVHQHDFIKNRFLGLNKHSIILGWLHSFCKQFYGSV
TKSDYLALRLGFIMTHCRGNPKFNFHKYMIRALEDDFKIVVGISWYLWIFVVLFLLLNVN
GITLSDLWVVLAT*

>g54596.t1
MARILKVAVIGAGVAGLVTARELQRQGHLVLVYEKSDRVGGIWVYNPQVEDDPLGLYPQK
IVVHSSLYPSLRTNLPRKFMGFSDYPFTIRDKNGGLREFPGHEEVLEFVNNFASDFGLIE
QIRFHTEVVRVEEKIWNEQWFVESKASGDQLILEELFEAVVVCNGHYPWRKGWNGCELII
VPNFG*

>g38503.t1
MKILHIPCLEDNYSYLIIDETTKEAAAVDPAEPHKIFRAAQENGANLKLVLTTHHHWDHA
GGNDKIKELVPGIKVYGGSVDNVRGCTDKVENGDRISLGNEISILCLHTPCHTQGHISYY
VTGKDGEDPAVFTGDTLFIAGCGKFFEGTAEQMYQSLCVTLGSLPKPTRVFCGHEYTEKN
FQFAVTVEPDNEKIRQKLAWAQQQSRSGLPTIPSTIGEELETNPFMRVDLLEVQEKVGCK
SPVEAIREIRKRKDNWKPTA*

>g67409.t1.2.5bbdf93b
MSTFLLRTPPLFHLSNSTSLFPHNNSSVHPIAYAVCPPLQFQFPATTVKRNLVVFNRIGR
RSLGKIAARALREWQEYEEAVKDKDLARALRFLKNISIEPRPQNSSIESSDDGIDGALES
FELQRDWDVLDTCLNADDMRLVGSAYAFLKDRGRLPYFGKYRNIVLEGPREITPAVLTSA
TGLEVSKLSPKKWGLSGSSSVLLIALLAGVSLLLNQGIDIRPNLAAILGLAMLDAIFLGG
SCLAQISSYWPPYKRRILVHEAGHLVVAYLMGCPIRGVILDPIVAIQMGIQGQAGTQFWD
EGLQNELAEGRLSGSSFDRWLTKLSTSH*

>g54801.t1
MGTPEHSREPCPDRILDDVGGAFSMGAVGGSAFHFLKGIYNSPKGERLIGGTQAVRMNAP
RVGGSFAVWGGLFSTFDCTMVYLRQKEDPWNSIIAGAATGGFLQMRQGLASASRSAVFGG
VLLALIEGAGIMLTKLMSAQQSMQQMEQQLPNMAGAPGFPMGQLPGQAPENVESLRAGSS
ASSSSGSSSSSSSTSWFGGFFGSGKKEEAGMSSGSKTEVLESFDAPSPPTFEYK*

>g64534.t1
MKWAAVKGEGKIAFKIKSRLKWVGLVGLVLSTFSIFIHFLLARYTDGGVSEYQSSSSVTI
FSWRPIFENADLSNNNPLYRRLWGPVRLLESLHPYANPRGNYPAPIHETNGFIFVRIRGG
FHEIRNSICDAVVVTRLLNATLVVPELQSTTSSKGISTQFKSFAYLYNEDHFIAALTKDV
KIVKTLPKNLKGARRKKEIPSFKVSNSASPYFYLHHVLPVLSRHSVVELVISDGGGLQAI
LPPHLEEYQRLRCRVAFHALSFRDEVEELATKVLNRLRSSGRPFIAYEPGMTRETLAYHG
CAELFQDVHTELIQHKRLWMIKRGIVKGNLSVDSAKQRLNGLCPLMPEEVGILLRAYGYT
WDTIIYVSGGEVFGGQKKLIPLHAMFENVIDRTSLSTPWEFNKVYGREANLDDKISRAPP
VKKKIKPEAWKTSGPRPRPLPPPPARSKYPYNIEGWWGWVAESDREPESTVMELRTNAHK
LLWEAIDYRVSVEADVFIPGFDRDGKGQPNFASLVMGHRLYQSAASKTYRLDRKAVAKLL
DKIREHLYQANHTWITSVRRLLRRNLIDGLAEEFTKSKEQSFLSFPVPECSCTRQTPTGK
TSNASASSPSSKLPAFVGATDSCPRWMNGYMIAQSRDKESEEELEENDSTSSGLFFRQSN
ANQEAGDGEIINKEDTQMEDNEELEGGDR*

>g72167.t1.2.5bbdf937
MLQLQLYSSRSWVLTPKPSLTKISPLRSDSRQRKSLLVKDNISSACRPGQLLISQYKKRK
ISCHMSRGELDPSANINVLDKYNARFSKMDVLSIFQLLQGKHGKLIIAFVTSFSLVRLIE
FLSTSAKPNVIQELLFYVISTYPVRSLPFACMSNSMSKPTPLQLDVSLPSFRDVRWNFSR
LIYLFNIQLERNVATFLIVLLIACISFVIIGGFLFYKLRGNKQSLEDCFWEAWACLCSSS
THLKQRTRIERVIGFILAIWGILFYSRLLSTTTEQFRSNMQRLREGAQLQVLETDHIIIC
GINSHLTFILKQLNKYHEFAIRSGTATARRQRILLLSDLPRKQIDKIADNIAKDLNHIDV
LSKRYEVDTDAFLSVLALQPLPEMDSVPTIVEVSSSNTSELLKSISGLKVEPVENFASKL
FVQCSRQKGLIKIYRHLLNYRKNVFNLHSFPDLVGLKYRQVRCGFQEAVVCGLFRNGKIH
FHPNDDEVLLQTDKVLFISPMHGKRKPQLAIPSGVDEDDNAFQDPETLKMSGKSLGRAFE
ITRARLEKIVKRSKSGSKASEWSVGRKECILMLGWRPDVVEMIKEYDNYLGPGSILEVLS
DVPMGDRNRASKLAGRGKLKHVQVSHRIGNPMDYDTLKDTISKIQKSFKKDEDIPFSIVV
ISDREKKLGDTTKADKHSAYSLLLAETICNNLGVNVHNLVAEIVDSKLGKQITRIKPSLT
YIAAEEIMSLVTAQVAKNSELNEVWKDILNAEGDEIYVKDISLYMQKGENPSFAELAERA
KLRGEVAIGYMKNNNKVINPIPKSEPLSLELTDHLIVISEVEGEQSIVS*

>g43439.t1
MDGERKKRKMDNVEAEEDDEEEKMELFFALIRSTQDVRKRMVMSNVDSLKLEEEKQKKKA
NDDQYKPPVAVWKPTFQPEDFMEDHPPHFQYLSTATTTITTTPHPSTSAIHEEAGPSISK
KEDDDEVKDQDDDKGGDDHYHDLDLKLSL*

>g37555.t1.1.5bbdf939
MEDSVKEQSSVSGNVRRSTPRLLRYPLRSAAKSKEEKPPLADASNSSLPGSRVRIASTVS
KSVGVLELSGKDKSAKPPRRLSIPTKSTASPAPRSVGNITPISEERAKKSTAKNDTPLSD
VSKSSLRRKFNSLTSASYWQSLIKLSESASKHSVSLGFFKLALEMGCEPLQLLRDELKSY
VRRHNLAEFAETLKELCQGYNILENLEQLQVSETCSHVPEEETRSSDDDVHSSSSISDTQ
KLKLKPSNAGDHEVCPVKETNKEKPQKNESATRVRRSVNKGAASSKTGVEAGPGRKQRKL
QKPRKQESNKDKLKKQGKKSANLEGNCI*

>g60955.t1
MSGPQCCQNAPKLSSSYGAGHVEELGGLRSYITGSADSKSAVLLVSDVFGYEAPKLRKLA
DKVAGAGFFVAVPDFFFGDPVPAVFEWAAVNDWLKIHSPDQGFSLAKPVIEALKSKGITK
VGAAGFCWGAKVVVELAKCAYIQAAVLLHPSFVSLDDIQGVKVPISILGAEMDKKWPPEL
LKQFGEALNAKPEVDGFVKIFPGVEHGWSVRYKDEDEKEVKSAEEAHQDMVDWFVKYLK*

>g61416.t1
MAVSTAGEAVQTPLLDDVVEGSVDYKGRPVNRSKSGRWRSASFIIGVEMAERFAYYGISS
NLISYLTGPLGQSTATAAENVNAWSGTASLLPLLGAFIADSFLGRYRTIIFASVLYILGL
GFLTLSAVLPSFKASDCQNEADAAACSPPEIQIIFFFISLYLVALAQGGHKPCVQAFGAD
QFDGHDPEECKAKSSFFNWWYFGMCGGTTVSLTILNYIQDNLSWGLGFGIPCLVMSFALI
LFLLGTMTYRFRVNSDETSPFVRIGGVFVKAVRNWRTTSSAISMEEESRGILPSCGSQQF
KFLNKALVAPDGLKEDGKVCSISEVEEAKAVLRLFPIWATCLVYAIVFSQSSTLFTKQGV
TMDRSISPSFEVPAASLQSFISLSIVVFIPIYDRILVPIARAITRKPSGITMLQRIGSGM
LLSCLSMVIAALVEMKRLETAHEYGLVDEPHATVPMSVAWLIPQYLLLGVSESFTMVGLQ
EFFYDQVPSELKSIGLALYLSIFGIGSFLSSFLISVIEKATGGDGHDSWFSNNLNKAHLD
YFYLLLAGLSAVAFVAYLYFARSYIYNRGSNI*

>g32013.t1.1.5bbdf93b
MLGRIRLFFSPRFIIPSFFSFSTSTTTSGTIQHHHRHQYQYENPSSPTQHCASLLQSLIA
QRAIEPGKQLHARLHHIGLAYNINLATKLVNLYSVCDSLPNAHNVFDRIPKGNLFLWNVL
IRGYAWNGPYEVAISLYYKMLDHGLEPDNYTFPFVLKACSALSDIKLGMDVHEHVVKTGW
EIDVFVGAALIDMYAKCSAVEKSRQVFDKIANRDVVLWNSMLAAYSQNGHPEECLLLSGE
MAFAGVRPTVATLVTAISASADVAALPKGRELHGYGWRLGFESQDKVKTALVDLYAKCGS
VEVARDLFERLVEKRVVSWNAMITGYAMHGHANEALDLFHWMVREAQPDHITFVGVLSAC
NHAGMLNEGRRFFELMTRDYLIEPTVQHYTCMIDLLGHCNQLDEAYDLIMQMKVVPDSGV
WGSLLNSCKIHKNLELAELALERLIELEPDDAGNYVILSNMYAQAGRWEGVAKLRKLMTD
RGLKKSTACSWIEVKGKVHAFLSGDTSHSMCDEIYAELETIGGLMAQAGYVPNTAPVFHD
VDDDEKRRMICSHSERLAIAFGLITTSPGAKLLITKNLRVCEDCHVAIKFISKITQREIT
IRDVNRYHHFKDGVCSCGDFW*

>g42854.t1
MWSSTTVFLTIIWAFSILYGEMFAFWVPPLWTCSWPHHLRHSSSSFKRLNDSGDYVKIAV
LTDPQLMDRTSLRLPPKSLALEVAQFYTDLFMRRAFLSSILPFKPDVILFLGDYFDGGPI
LSNKEWQESLSRFKHIFDLNVLQKTTNTKVYFLPGNHDIGYEALHSQIPEVVGRYEKEFG
ARNYKFALGKVDFVAIDSQTLDGNSQGNLTSATWNFISNVSQDSSSTPRVLLTHIPLYRP
DWTSCGPHRSSHIINQRISRSPDNQQIMYQNYVTEKSTNKLLNLVRPALVLSGHDHDQCT
VTHISKYGPVEEHTLGTISWQQGNLFPSFMLLSASNLSFPDGFALEDVISTHLCFLPVQT
YIYIWYIVLFIMTLPIVLFWPTKEVLVFHHFGYLRECIRSLINSTIFGGVPKEKNEDENC
EYEMMWDAEGSMHLIKKALKSPPKSSTGRVSVERGNAVMRSTAKRQIEQEVDILTLSDVN
VHVGLDTMIPSRMKKSKTKLVIRRLLRAIRMLSFVAAFNVPLYMMLLFKDWIDK*

>g24278.t1
MNPTELSSSDQNVVSFDVQDLHVPCAQLKLQFQDILFNPKYTIGADQFSKTSNLVSLYTS
VTDCSSILHFDDYKGHHALFNEVGIQKLRCIAEMLSSTNDLKDCVQMYIEHRKDVVNLMH
MRLYEKLNVERICFFKYWDELSEKIQRWIQVAKICIGTIFVIEKCFYEQIFGGLGTVEDA
AAAEGFLHIVRQATAQLFRFPDSLLDSHRLPPRLEILLPLYQELTNLIPDVILIFNQDLP
LAKAICNYATGIMFRLKKVMTKILSASEHHVLRELSMIPTPGGGIHRLTEYVVQYIDLIF
VHRRALIELVHMPQGPNGLNPPQMDSPEIDQGLISLKHHLTRVIESFLHNLKYKSNFYRQ
KSLRHLFLMNNFHCVAEKIKSSQESEEFVGIHYWMKLKEEVELARTGYIKSSWSKICHFL
RDEGSKSYLKCSFIPGSSRKSVKKKFKTFNRMFEHDHKSQLKWTVPDEKLREKLRASILA
RLIPTYNHFLQQFSCRIEKVKYPNRYIKYSGQDLETKVLNMFNMKY*

>g24899.t1.6.5bbdf934
MFVPLGLIEFLKTPEKNPSWKFHFLFFIMEDGSSSPNTMATLSDNIMNFNLVDDLLFDGF
WLESTTDESNFWQPGPSTSSALDSPSYYSLTSEINIGHLNSNIHQANISEEGKTYEFIDN
KSLLHTRVDEFVSRQTENPEAVLHSVSLSQPKSSFPVESSEMNRRLWIGPSRDPTSSTSV
RKRMVQAIEYLKKCAKDKDVLVQIWVPAKRGGRHVLTTKNQPFSLDLNCKSLAEYRHVSR
NYQFAADEDSKEFVGLPSRVFLKKLPEWTPDVRFFKIEEYPRVNDAQQCDVRGSLALPVF
ERGSGTCLGVLEIVSTAQKVNCRSELENICKALEAVDLSSSNMSIPPEVKDYNESYQVAL
VEIKSVLKCVCDMHKLPLAQTWAPCSQQGKDGYRHSGENYAHCVSTVDSACYVLDPQVMD
FHVACSEHHLLKGEGVPGGAFATNQPCFTSDITAFSKTEYPLSHHAKVFGLRASVAIRLR
SIHTGSADFVLEFFLPLDCKETGDQKQMLNSLSSLIQKICHSLRVVSDQELRKETAFPDD
EQPSSSVRSLDKEKCSSLLSPSEKSSLNASSWVASIMDDSRKGKGLAFSLDNHSGEPEEK
FKLTTWLENSKMELHHVPTFPEHAQIQQGSGLKGPPMDGEGISTIKEYHSTGNRKAGERR
RMKTEKIISLQILQQYFSGSLKDAAKSIGVCPTTLKRICRQHGITRWPSRKIRKVGHSLR
KLQLVIDSVQGAEGAIQLNSFYTHFPELNSAELATPCNLSVPKTSDRLQKLTNQTEGSII
SPGITASKSPSSSGSHSSSSSFSCSAGAMQSCSVYLPNAQDDSSAEQCGITLKRAYSDAE
LHDLIQEETKLLVRSQSQRIFRDDVVPDALPPLPESSNHIIPGGRTFRIKATFGEEKIRL
SLQPHWGFGDLLQEIRRRFNIDDVTKIVLKYLDDDSEWVLMTCDADLEECTDIYRYKSST
IKLSVYQPY*

>g76511.t1.1.5bbe19ff
MSEVNESRSAWGDEFAGPVDDAGLPPQHNSTTAAAVAAKKEGEDWRYHAVEFAKGFAEMS
VEFGKGVRDVVKQSVVREDSVIVKKLRGPCEIICGKLRFLNEYLPEDRDPVYSWTVILFV
LLLAFTVLIVNTDYDTTSPLVKKMFIHPPSATRILLPDGRNLAYKEQGVPADQARHSVIA
PHSFLSSRLAGIPGIRHSLLQEFGIRLVTFDLPGFGESDPDPDRDLESSALDMVHLSYTV
NITEKFWVLAFSGGSMHAWAALRYIPDRVAGAIMVAPLVNPYEPTMTKVEKRRTWEKWTA
KKKLMYILAKKFPRLLPYFYRRTFLSGKHGQIDKWLSLSLGNRVSNLDGQVFYQLRLWRK
CIDISVFARIL*

>g44641.t1
MASSKSLFLLISVLVLLISSELEAAGQESTTDGVVDAKYGNQVNGQGDTGGVDQFCRRIP
CRFGCCRRCPRGCIRCCRTANEVPDAGFDDNVKN*

>g9464.t1.3.5bbdf93c
MEMERVTEFPHTHMDKRPRKRPRLGWDVMPEALLPIQSQVVPKAQLGLFCGQESGNVTSF
ASSRATQDHTSSLFVKGVARTGSPPWRGDDKDGHYLFELGENLTSRYKIHSKMGEGTFGQ
VLECWDKENKEMVAVKIVRGIKKYREAAMIEVEVLQQLGKHDKGGNRCVQIRNWFDYRNH
ICIVFEKLGPSLYDFLRKNNYRSFPMDLVREIGRQLLECVAFMHDLHLIHTDLKPENILL
SSSDYIKVPDYRGSSRSPKDSSYYKRIPKSSAIKVIDFGSTTYDRQDQTYIVQTRHYRAP
EVILGLGWSYPCDVWSVGCILVELCSGEALFQTHENLEHLAMMERVLGPLPQHMLKKSE*

>g11758.t1.6.5bbdf937
MEFLDLFIVALIPVLKTLIITAIGLVLALEKVNILSDIARHHLNNLVFFVFTPALVSSSL
ADTITTSSLKKLWFMPVNILLTFIIGSALGWILVKITRTPKHLHGLVIGCCAAGNLGNLL
LIIIPAVCEESNSPFGDSSNCSTNGEAYASLSMAIGAVFIWTYVYNIIRACGMRSIGSTN
NIDYHDHGAEILPESNSEALLSNDYLPIEIYESHKTLPLDDTDDDEKVPMRQKIKKQLKV
LAARMNLKMLFAPSTIATIVGLVIGAATPLRKLLVSDNAPLRVIYSSASMLGEATIPSMT
LVVGANLLKGNLKMLLKCLLLFCNFSFGL*

>g50391.t1.1.5bbdf940
MPEVNNESRSTWKDELAGLTGDTGTQRSYNSTTTAAVEFAKGFAEMSVEFGKGVRDVVKQ
SIVREDSVVVKKLRGPCEKICGKLRFLNEYLPEDRDPARSWSVILFVLLLAFTVLIVITD
NDTSPMVKKVCIHPPNATRILLPDGRHLAFKEQGVPADQARYSIIAPHSFLSSRLAGIPG
IRLSLLQEFGIRLVTFDLPGFGESDPHPDRDLESSALDMVHLSYTLNITDKFWVLGFSSA
SIHDWAALRFIPDRVAGAIMVAPMVNPYEPSMTKEERRRTWARWTAKKKLMYIFAKKFPR
LLPYFYRRSFLSGNHGQIDKWLSLSLGNRDRALIEHPLFEDFWQRDVEESVRHGNANPFV
QEAVLQVSNWGFKLSELKARKKNKGKGLFSWLKSMYGKEVESMNGFLGPIHVWQGTDDKV
VPPSMIDFVQRVLPDAMVHKLLHEGHFTYFYFCGECHRQIFSTVYGIPQGPLTPKVDEIA
IKEDAENIDTEDLEEVLLSEIPQEQNILLL*

>g54910.t1
MESVEKVAKDVDTRNEVKSNINASQSILLEQAELPRVPLEQLAEYVRSQERGDTIFENPW
VSNDILHDLQLLENQLPMRFVCSMYDGFAYEKLGKFLDDDSTDPPSFHELAHEHFKNVGN
TGKLELKCDFLGSRHLVEFLAILHSPKHPRDEPKHGKGFEFARCATVSLAEKVDGLTEMA
DDLLDSIAYEVRRLKKEHLENRKKQNKVRNFFSPSYSFPVTKVKMHHRFECINSSFRSLS
REAHSFGLQKQQIRQTTYSSVLESQIFTRSCEALKKMLLEKAENDEELLFVRIVEMGGLS
KTTLAKVLYEDDEVVNHFDVRMWVCVSNSFDIDKILKDMFESLTYTVLDKSSSNREEILL
TYPKRPKGKKFLLVLDDVWCNTQDLGGYF*

>g63951.t2
MDSSIEEKEDMIKETLLNASPPKGGMRTMPFIIANGMLENMANYGLSPNMTLYLMNQYHI
EMTTTSNILFYWSAANGFTPVLGAIVVDAYVDRFHMIGFGSVINLLVPKVEFLARLVGTG
C*

>g49452.t1.2.5bbdf93a
MQGIRKICFELLDLKDAVVENLCGNMRTKYSAFLRLSEEVVEVEHELHDLQTHISAHRIL
LQDLMAGVSKGLEEWTLANEDVQEAEHGPQNTDLDATFLSKKVDQSTIILENIDVLLAER
KTDEVIEAIDAEERSHQELKTSADMSVTESSFYRTALSKRKLMLENQLVETTMQPSISIG
DIKKTLSGLLKLGKGPLAHQLFLKSYGSRLQKSIDTFLPLCPCYPETYSTSLSNLVFSSI
SLTTKESAMLFGDNPVYSNKIVQWAEGEIELFVKLVKEHAPSSDTASALHAASVCVQASL
NHCSALEPQGLKLSKLLLVLLQPYVEEVLELNFRRARKQILDFSQSDGSMPLSPRFASPL
TTFAASSDSLLVASGIRFIFIVKEIVEQLTHLVILHFGGNILTRISQLFDKYMDVLINAL
SSTSEDDSLTDLKDVPFRAETDSQQLALLGTAFTIADELLPMVVSKIWNILGESKEAVIG
PMESVMPSANNTLEFKEWRRQLQHSLDKLKDHFCRQYVISFIYSRDDKTRLDAHIYLQGK
EQDLLWSSDPLPSLPFQALFGKLQQLATVAGDVLLGREKVQKVLLARLTETVLMWLSDEQ
EFWSVLEHDSAPLRPLGLQQLILDMHFTVEIARFAGYPSRSVHQMASAINARAIRAFSAR
GMDPQSALPEDELFVETAKGAINKLLLGTSGSDTSEIDEEHIIIHDDAISDSDASPSSLS
TVESSESESFASAEMGDLDSPIFSDTES*

>g15182.t1.1.5bbdf937
MVGAICSGQIADYIGRKGSLMIAAVPNIIGWLVISFAKDSSFLYMGRLLEGFGVGIISYT
VPVYIAEIAPQNMRGGLGSVNQLSVTIGIMLAYLLGLFCSWRVLAVLGILPCLVLIPALF
FIPESPRWLAKMGMTDDFEASLQVLRGFDTDISLEVNEIKRSVASSTSRRTAIRFGDLKQ
KRYWFPLMVGIGLLVLQQLSGVNGVLFYTTSIFESAGISSSSVATFAVGAIQVVATAVAT
WLADKTGRRLLLIISSSGMTISLLLVAVSFFIKDFVSESSSIYNIFSILSVVGVVLMIIS
FSLGIGPIPWIIMSEILPVKIKGLAGSVATLANWFISWAITMTAPLLLSWSGGGTFTFYA
VMCAFTVFFVAIWVPETKGKTLEEIQFSFR*

>g16415.t1
MMETTQSNWTKKHPQHQQLSTAAAKSRPQRLSQLLLPPLPLALPTNTNINDHMTTNKKKK
KNNSLSEQELKLAAIAINLNVRLRTSDMPVSMQEHALRYTRSLIPTAATSDATPPPPQRL
SPTLLARSLKKEFDRLYGPAWHCVVGKSFGSFVTHSAGGFVYFSLNSLSFLLFKTEVQLV
D*

>g35089.t2
MSILLKKTLHVLLVITISWFLCASQIHGLNVPFHPLDVLPVLPRQVSWPIMNYLNSAADL
LPSFVGAASAANNSLEWKGACFYENNAWLEFNNKSGSEFGGGTLHIKVSKAHSWTCMDLY
IFATPYRVTWDYYLLSREHTLEFKEWESKLEYEYVKHKGVSIFLMQAGMLGTLQALWDVF
PLFTNTGWGENSNIGFLKKHMGATFEQRPQPWVTNVSVDDIHSGDFLALSKFRGRWGGFE
TLEKWVSGAYAGHTAVCLRDSEGKLWVGESGHEDEKGQDIIAILPWDEWWKFELTKDEAN
PHIALLPLRPDVQAKFNETAAWEYARSMEGKPYGYHNLIFSWIDTVEGNYPPPLDAHLVA
SVMTIWSQLQPAYAANLWNEALNKRLGTEGLSLPEVLVEVEKRGSSFAELLAVPERDDWV
YTDGKSASCVAFVLEMYKEAGIFGQLGSSIEVTEFTIKDAYTLKIFENDSSRLPQWCNDG
DTVELPYCQIRGKYRMELPGYNTMDLYPHMNERWSL*

>g69951.t1
MKAAIRSENPVVLFEHVLLYNLKERIPDEEYVLSLEEAEMVRPGEDVTILTYSRMRYHVM
QAVKTLVNKGYDPEVIDIRSLKPFDLYTIGNSVKKTHRVLIVEECMRTGGIGASLTAAIN
ENFHDYLDAPIICLSSQDVPTPYAGTLEEWTVVQPPQIVTAVERLCQ*

>g76822.t1
MATKLWASRAASYLRISVFNRGFATVIKDFKYADSHEWVKVDGNSAVVGITDHAQDHLGD
VVYVELPEVGSEVKQGNSFGAVESVKATSDVYSPVSGKVVEVNEKLTDSPGLVNGSPYEE
GWIMKVEISKKDEMNSLLDSEQYTKFCEAENEKH*

>g23204.t1
MGLLGSLLEIIGFGIGAPIGLVLGYLIFIYFDPQDVIKDPVTRPLEEMDVSSSADLPLWV
MKPDHERVDWLNKFIHHMWPYLDKAVCRAIKSTVKPYFAEYIGKFQIESMEFEILTLGTL
PPLIDGIKVYESNENQLVFELTLRWAGNPNITLAAKLLSAKVTVQLIDLQISATPRITLR
PIVPTFPCFSNVVVSLMKKPEVDFGLKVMGGDMMAIPGFYHFVQVSCDLSMRSLKMPKRL
NLVRERVKKPVGILRVKVLRAQKLLKKDFLGSSDPYVQLSLSGDRIPPKKTTVKMNNLNP
EWNEEFKLTVKDPFSQFLELHLYDWEQVGAHDKLGMQVVPLKQLTPYEKEEFTLDLLNST
NDNDSHNKKCRGQIMLEITFVPFLEDSKKFSAVPDYARNESIKEVPADNLSGAGLLLVTV
IGAEDVEGKNHNNPYALVLFKGEKKKTKSISKSRNPTWNEEFQFVLEEAPSKDQIHIEVI
SKRRSSVFRSKESLGHVDINLADVVHNGRINEKYHLINSQDGIIHVEIQWKVI*

>g26315.t1.3.5bbdf93c
MEINLEMPSVHDDTEVDTASNMDNYEHTNEIRCGKENLNSLIRDGVDCNDTNDKSGTAFC
FEPQIGLEFDTKEAAYSFYREYARSVGFGITIKASRRSKKSGKFIDVKIACSRFGSKRES
SATGNARSCPKTDCKAGMHMKRRADGKWYIYGVIKEHNHEICPDDFYFTIRARDKHCTSF
VCQKKGLQLALGLEDVKLLLDYLTLMQSKNPNSYYAVDLNKDKLLNNVFWIDAKGRNDYR
QFFDVVFFDTSYLRKGYKIPFVPVVGVNHHSQYILLGNALVGNETLSSFVWLMRTWLRAV
GGQSPCVVITANDTSLKEAVADVFPDARHCYCLWHILELSRQNLAYKADNYKDFEQIFNQ
CIHQSWTDEEFRSRWKEMVDNLDLRDDVWIMSLYEDRKKWVPTYMRETFLGGLCTIERSE
SLSSFFDKYLHKETTFREFLDQYRSFLLYRNEEEERSEYETRNEKPILKSISSFEKQMST
IYTSAIFEKFQAEILGIVACSLQKEVEDETTVIFRVNDLDGHQNFIVGWKERDFDISCSC
RTFEYKGFLCRHAMTVLQLSGVPTVPSKYILKRWTKNATVRDTISVLSSSLSTRLQRLNN
LCKFAIKLGEEGSLSQETYDFALFALEEALKQCVGLNNSMRSDLETNMLVNQGFLNFEDG
NLESNMAKASRRGKLLKKRKVQQEVEASAVGIQSSNEKMGQMSLLAPFREGNYSHQHYLQ
GHCACMGWPVLLSCWEPHGIVCSLKYLH*

>g64873.t1
MAENEIKEPPPQPVEEENTIGGGDDDHPMPDAENSKKHSDSDSESESESDSDSEDEAQLN
LQIQALENELSSNPSNYDVHVQYIKALRKQGDLEKLRQAREAMSALFPLSPELWREWARD
ETALSSGPEVLPAIEQLYERGVSDYLSVDVWCDYINFLQEYDLSVRECSANGISKLRNLF
ERAVIATGLHVAEGSRIYQAYREFEQAVALTIGEADSESREKQVQLIRNLFFRQLSVPLA
NLRSTLLSYKTWEAEQGSTLDVDPNCLDGLPSNVASAYQKALDMLNARTHFEEEIARKDV
PDSERLQKFMSYLNFEQSFGDPARVQILYERAITDFPIYADLWLDYTRYLDKTIKISSTV
RTVYSRATRNCLWVGELWVRYLLHLERVHASEEELSTVFEKSLQCTFSRYDEYLDLFLTR
VDGLRRRISLSGEMEGALNYDLIRDVFKRASDYLSPHLKNTESLLRMYSYWAYLESKLGK
DIVAGRGVWENLLKISGTMLGAWEGYIAMEVAEGHINEARSLYKRCYTKRFSGTGSEDIC
NSWVRFEREHGSLEDFDVAVQKVTPRLEELQLFRTQQESRAAGSADQRESSLKKSSREKR
KPHSNLTEDQSLPKRQKNMSENLKMTNEKEKIEAADSVEKSKVEEVEHMSNKPASKRENN
HESPRKPKHYNDQCTAFISNLSIQATYENVRAFFSDVGGVVAIRILNDKFTGKSRGLAYV
DFTDDAHLAAALAKNKQNLLGKRLSIARSDPRQSKKKGTVGPSTTSKLGRGDNQTGSAEQ
SNLKDAASRSEENSVSLAQSSSQKRRDERVELKGRNTFAVPRAVRPLGWSSNKPVASEGD
GEEKPKSNEEFRKMLMKN*

>g50282.t1
MATEDGISEYTQDGTVDLKGNPILRSKRGRWRACSFIVVYEVFERMAYCGISANLILYLT
KKLHQGTVTASNNVTYWIGTIWLTPILGAYLADAYLGRYWTFVIACAIYLSGMCLLTLAV
SVPGFRPPPCHDVNAADCPKATTLELAVFYTALYVLAVGTGGTKPNISTIGADQFDDFDP
KEKAQKLSFFNWWMFSIFFGILFGNTVLVYIQDNVGWALGYGIPTAGLALSIAIFLSGTP
FYRHKKPAGSPFTRMARVIVAAIRKSRVPAPTHPKELYELDAEEYTKKGKFKIESTTTLR
FLNKASVQTGSTSPWMLCSVTEVEETKQMLRMLPILITTFLPSVMVAQSNTLFIKQGTTL
DRSMGKHFQLPPASLGAFVTVTMLLCVVLYDRVFVKAIRRWTKNPRGITLLQRLGLGFVL
HIIIMIIASLTERYRLNVAKKHGLDQTGGQLPLTIFILLPQFILMGVADACSEVAKIEFF
YDQAPESMKSLGTSYSMTSVAIGNFLSSFILSTVSHITKEGGHKGWIQNNLNSSRLDLYF
AFLAVLSCLNFLFFLVVTKFFHYKAEISDSMELLKEELEGPKKMDHQIELADNKR*

>g60248.t1
MTLSAAENCADSTPSLSQLASLEAVLFDVDGTLCDTDPLHHCAYQVMLQEIGFNGGVPIT
EEFYIQNISGRHNDDIADTLFPDDREKGLKFCEDKETAFRRLAKEQLKPIDGLYKLRKWI
EDRGLRRAAVTNAPKPNAELMISLLGLSDFFEAVILGSDCERAKPFPDPYLKALEVLQVS
KDHTVVFEDSESGIKAGVAAGMPVVGLTTRNPEELLNQAKPTFLIKNYEDLKLWAALEEL
DKKSGRATDSA*

>g73643.t1
MKNLDVNMYNGDAKFLSKARNRTVVFGSFNMVLVKEKKNLCGSCGYQLNLSSSSRNTSTI
GSKYGKSIKKGIISFFYIDETRFNQVEEFKCVPYFVSKYSFGLFRRRTKLLCRNCGNHIG
NSYDDSAASYPLVTNESDYSSCSESSTQKKYDIRIRCLQPSSVQDAAPVF*

>g32151.t1.1.5bbdf941
MEPEKIKKSGDGDTAHSTAEPVHTNKKSPNSLKAKLKDVGKSSSGEFGQSKEAETGSEAK
ARNQKKRKRNKQGKQDRNDKTDAPKVLISHHRNEAKKITEDKREERKRGDQKSGESIGGM
IFMCNAKTKPDCFHYRIMGVSKSRQELVMRIKPGLKLFLFDFDLRLMYGIYEASSTGGMK
LEPAAFAGAFPLQVRFKIHKDCLPLTESVFKKAIKDSYDEKTHKFKTELTVDQVKRLTKL
FHPAPSLPSSGISSGTELVQVPIVQPPSSSTLLNQGTRRQQDYREKYGNKPRQGSIPDDG
DDHHIKPNNAYSSHPLFLTEKEYRSYGLRSERHFLPTTAPVGLPTDHAYDNHRFDHAREQ
IPSNPISLSNNAASVQKEPDCRNIHFLSEKEYRTYGLRGCPGAPSGLTPTLETNRSYEDS
MKNLCNPYDDSTTSLVNRYLSLPGSVATPAEPYYLTSRGAYVNGSSYKCVGKDHVGILDP
KGEISHSSYASHALSDYNRNHLRLGGEPNITSSTVSSRYSFEGPSFSRR*

>g1879.t1
MSSSHPLPISNPKPQAQPQAQPGSTLTSPSVGAFLTRLSDSIRRLFSRRRPWLELVDRSA
FSRPTSLSDATTRVRKNLSYFRVNYLTVFGSVLAVSLLSHPFSLLTLLALLAAWLFLYLL
RPADQPLVVLKRTFSNGETLGILIVVSLFVVFLTNVGSLLMSASLIGAGIVCVHGAFRDP
EDLFLDDQELPGSGLFSLISGAASSAAVSSATPVIVSHV*

>g7262.t1
MTLAKRVPVFLLRLLALGATVTATIIMALARDTVQVMNMTFEAKFTNSPTFKYFVIINAV
ASGYSLLVLFCPSKISLLRFLLVLDMIVTLLLDSSISACLAIGQVGKNGNPNAGWLPICD
QVPKFCDHVTGALIACFVASLAYLTILLYSLHNIFGILALKP*

>g30688.t1
MRLMSLLSRLGFERSLLIRLGHPLQTESLPILVFGQLYTWQMIDEARYYPIRGMLFLGVE
NENINDETDSGCNSVYRRLDFVTTWELTTSSLVQSR*

>g3793.t1.1.5bbdf940
MGKRNFCYGEVLPFIVMAFLQCAQVGLSTLFKAAASDGMSYRVFIVYSYALSGLVLLPFA
YLFERKKKLPPFNIKLFGRFFLLGLLGFSAQMFGFKGIDYSSPTMASAMSNLTPAFTFAL
AILFRMEKVEIRSLSSQAKILGTLISIAGALVVVLYEGPTVIRSYRLSVLSYQPLHSSHS
NWIIGGLLLIADYLVLSLWYIVQAQTVQIFPAELLLVSLYNLCVAIIATPVTLISEAKWS
AWEISTKMMLYAILYAGLFGTSFATVLLTWGMHLKGPVYAALFTPLAIVVAAITGVIFLG
DSLYLGRYDDFSIHLFIYLFSVGGIESMPPLMFQPLPELVPPLPKNHPGDSNSRFGFVTS
PPRPSEPPKGDNSYIETVLF*

>g25784.t1.4.5bbdf93e
MKNFLKKLHIGSNQTEDSEGSTSSSKGDRLSDVSSPERFSHSRSQLTPEHNKPFSAMSGW
LNSVTHRKSPSPPSSSNVPRGDKMEPSDSGDSSGLDAVLDAVRRDLESSNSKDPDFEEEY
QIQLALELSAREDPEAVQIEAVKQISLGSLPLDNTPAEVIAYRYWNYNALSYDDKILDGF
YDLCGIFTEFTSSKMPSLVDLQGTPVSDSINWEAVLVSKAADTKLLKLEQEALEMAVKWR
LESVNFVGHNLVRKLAIFVSDYMGGSVEDPEKMSIAWRNLSSNLKETLGSMVLPLGSLTI
GLARHRALLFKVLADSVGIPCRLVKGQQYIGSHDAAMNFVKIDDGREYIVDLMADPGTLI
PSDIAAANTQHEEPLLGKDSPKDDNPHFASSSAVIPSPLENYSEVGCRFADSRGEAIESN
TKGNLQNFLPQITGEEGSNKFAEDLTKQCGVMKLTSEIPSRPNPPYAHARSPSWTEGISS
PAVRRMKVKDVSQYMIDATKENPQLAQKLHDVLLESGVVAPPNLFTEICPKKFDAGQVDP
KSPKGNEENKEKGKKTTGLGNVNQIGFLPPLPCHGLRSKGGPSEQVEHQVDLREVTRQHV
SSLPEVTPVRYKKNVPVAAAAAAAAAVVASSMVVAAAKTGTDTKLELPVTAAATATAAAV
VATTAAVSKQYENLEISACLPDSPVALFHPSRCARSDEDADAAAYDQRGSGNQEQEDLLD
GERTSNRSTGNDSAKSDAMLDDVADCEIPWEDMALGDRIGLGSYGEVYRGDWHGTEVAIK
RFLDQDIAGESLEEFKSEVRIMKRLRHPNVVLFMGAVTRPPNLSIVTEFLPRGSLYRLLH
RPNNQLDERRRLRMALDAARGMNYLHNCTPVIVHRDLKSPNLLVDKNWVVKVTFSYPSNL
DYAIIYCPNMLSTLHPDGQTK*

>g17829.t1
MADQQPIEEEPTIFLPSTPLPSPKTSHHHHHQQQQPGTTPSTSFMILLKIISKRRTWVCL
FIGVYTILLSLSWNFHKSVLSWYELTLINSSSTNSASYSSLVYSGWAALYASVLLGVAFG
VLSVVAALAVAVPATLVTWITVLVLLTFCGKPRRSLVMEGKKLTAEITGSVVKVLIKEGN
IVAVLCAVLGYFAFVRKSKENATSSNGNNIAAGHDYQI*

>g36940.t1
MDSLWKRFPNLVYEAVKLLVVVWTVICLINTTRVECGRSRILGEPIFDVEYSAISCRAHS
ASIEDFGGVGDGKTLNTKAFQEAVNQLSQYASDGGAQLHVPAGKWLTGSFNLTSHFTLYL
HKDAVLLASQDISSWPVIDPLPSYGRGRDTAGGRYISLLFGTNLTDVVITGNNGTIDGQG
ALWWQQFHKKKLKYTRPYLIEIMHSDSIQISNITLVNSPAWNVHPVYSSNIIVRGITIIA
PIKSPNTDGINPDSCTNTRIEDVYIVSGDDCIAVKSGWDEYGISYGMPTKHLIIRRLTCI
SPYSAAIALGSEMSGGIQDVRAQDVVAIHTESGVRIKTAVGRGGFVKDVYVKGMTLQTMK
WVFWMTGNYGSHPDHHYDPNALPVVQGINYRDVVAKNVTMAARLQGISGDPFTGICISNV
TIGMAKKAKKYPWTCTDVEGITSGVVPTPCASLPDQGPEKIGMCDFPTENLEIEKVELRR
CS*

>g56155.t1
MKILMLPWLAHGHISPFLELAQRLSKRNFHIYLCSTPVNLSSIKKKITDEKYSNLIELVN
LELPSLPELPPHYHTTNGLPPHLMTTLKKAYEMSTPNFSNILTTLHPDLVIYDFNQPWAA
EIASSQNIPAVQFLTVGASIICFGLHMLKCVGKEFPYPEIYLRDYEMAKILGAGEVQVND
VSDAQRFLQALEKSCRILLIKSCKEIEEKFLDFLSVISGKKVFPVGPLVQDFSSDDIQDG
EMEVINWLDQKKKASVVFVCFGSEYFLTNEERNEIARGLELSNVDFIWVIRFPFGEKLTI
EEALPEGFLERVGDRGKIVEEWAPQARILKHESTGAFLSHCGWSSIMESITFGVPMIAMP
MHIDQPLNARLVEAIGVGLEAVRDEKGSLQSEEIAKVIRKVLVDESGENVRRKSKELSEN
FEMKGDEEIDCLVEELVELCGKSN*

>g6417.t1
MASLGPIQRPSITAQASDSKPQKDPSMASHEKDHGYSFNFVCPFSIPPTSEAAAIRIIKN
LVSFGLYYLLFVYLVLFIALIPRRKVSLVYLVATKEITFLYLLLLRALPSSFILQKIINK
FFVVFLLCIITGFEMIFTEAGIHLLITLVSTTPVILIHAAFWREDLHLVNSEDGSAAGGE
LLPIMQNEGADDVADEPTNVV*

>g56888.t1
MAASDDDDESLARFLESEVLSEFSDQGLFGSCDLLKGEEEREKQLEFEDEVRVGKRMLLT
EDDSTDEVEEEKDARRKLNEEDDISEEVEMRKEEEENEEEEEKQVNKMLIEEGVISCEDE
DNEEGEEREVKRRRFEEVDSSNQAKSMILSSYKLLSSNELGASSISKSGTAIDVNNIGSS
NGSRPVPWRMETGNFSKVPPELFRHILKFLSSEDLVACSLVCRFLHLAASDESLWRRLYC
MRWGLLPPKKLRECAWKKLYIQRDEEDMVEVVRNCPSEFKEYYMQMQAAKRSQAPLPSQV
LDDWVIIDKTITDQVSTWKSSRGLSDKAVADHACSGETCTYHQIGDVFVCEKTGNVHVCD
DTCKEVVADPANELLVCTISGRCFDRLLSPAEMEPDVEQQQGGVTDEAEPFMGSGRFARA
YLLGYNCADEKELEATWRFC*

>g65729.t1
MEGLSTICAGLGILDEDDNGNRIGYSKSEYCLDNLKDLLRFLRRDDPQTREVFKQVCRWN
TVGKDLIPIIEYCQDDRNLVLNAVKVLVFLTMPIEPTSNDISQQIEYLWSVKSSITFSHI
VPVVLSLLENPLENLESETFTEDDWKLVQLVLTLFRNLLAIQEVSTQQKAGGSATQFLSI
RDKFLELLFQENVMDILQVLSQHVGGSCGYFRQDNLLLMETFYYIFMGQEPELVAKAYLE
NSKEDENDEISLKGLSYIMQDEKEKRKLNRFRNMGCYSQFSGIFTRLTLDGSKTLFKGSP
CSASRDALLKAPKNHRGPFKRTAWDHGRLTSKKSKTLQLLHDFVDQFLSGGYNVLMQSIR
EDIEKEHHAIQNSDVVIFFQLAWFVTSFQYHKFLNLKPNTQVDEKSSINHNADCTLFGGS
MCGPIAESLNESMFLLLISKWRFAFDGLKETNDYKLLSAAGSLLKIMIRLLDLVLKQSPE
DSMEPKTARILLYKLFYDQTEEGMTQFLFNMIKSFDTHKQAKSDLADLVETIHVVIRLME
NLQTRGTLRVSKRSRKRKMKKDLVDESVGDHVITQNEVTGESEDVSILGKEKSVGHDSAG
NGNDDPCQVIPHTQSGAEIENLKSNRSEVEPNVFHEIYQGTDNSSSDEQPVVTDEVDFKM
STLVSALSNQTIIKNLCWLLKFYKSNSVGTNYYIICMLRRVCEDLELSPMLYQLSFLTTF
YNILEEQKSKPCKEHENVALFLTNLVRRMLRKMKTRPLLFVEVLFSKTRRECPLINAECM
LNELGNLKKDIREGGSNGETGLFGGQGWVRRSLADALGDDEADFMTLHEEVGEKNEYSNE
TNFSDSERSKKRFGERNESFVSSSKNKAHVKENDSKHGQGLRKRRNSLALNDELEEKFRD
LYEKYKNDGNCCHLIANALDEDAVKVSPVEVSQTLKKLGLKLLRKRRLSAADSPDQLRDG
EITDPNVEGSSSLRKPLHTRKRVRALSEDQEQRIKGLFEQFKDHKRCSHMIAKALDTEGS
VSTAQVSRKLKQLGLFVPTKKRLETNFHLRDDGASELSSGGAYDSDNETLISLRRRKKNQ
QNETESARRQNQNTTRQLQRDNSDDKLLRSFLPTKNQQDETEISQRQNQETARTLSLDNS
DDELPSDATEQPAKVGVLEMGPGTLDHTSFAETEGISSGKQSDTAFVNKSDNVQLQEMHD
QLADFEDEVSPVESQKSIVPRRHLRMIFDLEDDE*

>g71078.t1
MELSLAKAQMIRKPLMLKDYLLDDLSSCSSNGFRTYPRRQCCTTVRFLLEIDLKNKPPKY
IKKPPLKNPSKPSASAFQRAINAVKSLPFATSISSSSFPSNKLKLTLLPRSLSRRLPKRS
FWKRSERREILRWEPINQLVVEKKSLPSDFTTAADGDCHSSTSESNSWSDGYFTASDDST
SCNSAVKISNGICNDIVLVDKVVCNKRAGVLLDGGDDSMDAITSSNSSTSSNNTKQTWPS
QEEREQFSPVSVLDCPFDDGDDEVSSPFQDRLAHMEGTKKRLMKKIKRFERLTQLEPVNL
EKRIASSESGHKSNESHQCHSSKSVRKDFILESEEEENQASDKAFKLLQLVKATMPSISL
EFKADHDRLLLDFFEEGMEMDISSPEYAKELIRSIELDNKLLNVVNSWILGQSPELFLEW
EVQKNREAYIRDMERGGTWWKLNEEKQDVASVLEVEIFSSLMNELLNDLLWY*

>g69310.t1
MISLANCNGDEVLFTYLHLSSSLVKKSEPLAVMWRGPSVDSFKLNTDASIRDDLVRGGGV
LRNHWGKPIFAFHKVLEGPSVLDAEAQALYYGLKFCLDKGFKHIEVEVDSQVLYTLLSSS
GITTWPLCLILQNIHHLLLKLSGSIHHIFREANAVVDSLAGLQLSQDALFDCARDIPNRT
KALISLDKCHVLHPNLKLGNENNKKTIDQIRVSKQGHKEYIPKKNVASSLAHVNAGNGMS
DNLKDNEPVENNSSEAPNITSNVLVGMNTSMDLMSSQVAVNGEQYHENIVICSGGVVDGI
EQDRGDVSKNERASNELLNLVEEAVISAADGIIETMANKVLEEDSNAQEVFEEVSRRKSN
MIKDLNLSPRKDRNSVAESMEELKRRLDGLKKMDEWQMVSHKKKNKSPFRSLQ*

>g60897.t1
MVGRTGSFRQSFAEKRERERLLSSCKLGDYSELPGFSHSLDYDASERWCFSGVISSVKVK
LLELWKNLRSVAMKAWEMGKSDPRKIVFSAKLGLALMLISFLIFLKEPLKDLSRYSVWAI
LTVVVVFEFSIGATLSKGFNRGLGTLSAGGLALAMGELSQLAGDWEEMIVIIGIFITGFF
ITYAKLYPTMKPYEYGFRVFLITYCFIMVSGYRTREFINTAVTRFVLIALGAGVSLAVNI
CIYPIWAGEDLHNLVAKNFTSVANSLEGCISGYLNCVEYERVPSKILTYQASDDPVYSGY
RSAVESTSQEDALVSFAVWEPPHGPYKMLNYPWRNYVKVSGALRHCAFMVMALHGCILSE
IQAPAERRQVFRNELQRVGTASAEVLRELGNKVKKMEKLGSDDILYEVHEAAEELQKKVD
RKSYLLVNSESWEIGKPEGLKVPQDCLDMNDEGNNSLEHKSHSETVINIRSLQLSRSWDD
RNLNTHINFNPAAGALSENMTEKQKSRPINVLPEAGQIPEDDESKTYESASALSLATFAS
LLIEFVARLQNLVDSFEELSEKAKFKEPVNLSEAEDEEVGLCTKFCKLFKSSKGNGN*

>g8389.t1
MGSSSDRLFNRQRTVHQILGGGLAADVILWRHKNLTAGILVVTLAAWVMFEKSGYTLISL
VSSVFLLLLTILFLWAKSAAILNRPAPPLPHLHLSEEMVNDAAATIRNHINMLLSISQDI
ALGKDSKMFVKVAACLLLISIIGGFTDFLSLGYISLLTLLTVPAIYERYEAQLDCYAILL
YKRLSMLYDRLDTECLSRIQSLILEKKKLS*

>g331.t1
MWRKLIDAASFGDCMVLDDLLQEDPKILERIPTWGHLETPLHLASMFRHVQFVQKILGVM
NSSLSGKQLNRLNQDGFGPLHLAVANGHLDMIMILLEFGKINSIVEDLCMNKDRDGNIPL
YTAAARGDIEAINVLVAASPKSTFELTVQEETILHLAVKYNKCEAFMFLVQQINFGDFLN
SPDHEGNTVFHLAAARK*

>g32527.t1
MTCPMSPPYLEQELDERYNLLRFWDFPRKTEFLKLYSQEIGAVVGNATIGADAELIDALP
KLEIVSSFVRSGLWKNGDFQLTSKFAGKSVGIIGLGRIGSAIAKQAEAFDCPISYCSTSE
KPNTNYKFYPNVVDLASNCQILVVACSLTPETHYIINREVINALGPKGVLINIGRGNHVD
EAELVSALVEGRLGGAGLDVFENEPQVPEQLFGLDNVVLLPHVGSGTMETRMAMADLVLG
NLEAHFLNKPLLTPVL*

>g30495.t1
MKPPTLTFHGVLLLFLLSSVCSMSALSHKIPRLTLHGSISQNFESIDSSPDFKTYFYEQT
LDHFNYGPQSYIAFKQKYAIIDKYWGGANSSSPIFAHLGAESPLDHNLLRIGFPVDHAPI
FKALVVYIEATSESCYQTIKDSWDVIDNIAHQPGGLSILSQRFTTCSHLNKSVELKNFLV
LLYATNAQYNHPPDYPLTGLCQAIDQAGSEADIIGQIFAGVEFAFGKNSSCYDVNYFVRP
TETNLGWGWQTGSEMVMPIGRTGNASMFQPAPFSLTEFSQYCKIVYGVPPRRHWITTYYG
GHQGEQEHGSWAKGTREMESQMGTKHGVRNQPHDGTNRSDGKEREEIIANQNLNKNEVPR
RGVLGDFNGKITRSDSNSGLKISENCLGEQGLKTSDGPYDVQDLMEHRQWNLNRLHSLFS
NEEVRAIKNIPLSWFGKEDRQTWSGNKQGIYTTKSSYVMAKEMIKEEQQQQQDASTSRTN
QDPKLWLQLWDLNIKYKVKHFLWKCLHDNVPTNERVFRRIGKGSPLCKRCGEDVETLEHM
LFHCKENYMTWETFPVRWDGLKQFRGNFREWWENLQKARERGRGKEHIEATAYLLWQVWK
ERNSWNFNATKKAEHVVAKSAISEWVSWLGLHPANQNTDPEWLVTQRKIEVQIIEGWIKS
YYADLFSGPTGLVPMWGSNHEIENRIGEDLAFCLGQGRGKGRRKENELNTNREKETKANE
PQRK*

>g72732.t1
MPKRPRVSRTTSPSTSSSGGYPSAVAEEFATATVTVTVKLQRLAKPNIVIISKRTEEKKL
LRAHFVSAIVMEQPSFFDKMMTNLRSTCKYYTGYPKDLGPSRVIHFTSEREFVQLLHQGY
PVVAAFTIKCNLTKHLDKVLEEAAVEFYPHVKFMRVECPKYPGFCITRQKKEYPFIEIFH
SPEQAINQGRVADPNITKYSVQILPFNYDVSAYGFREFFKRHGIGQSSST*

>g62218.t1
MKIRTDITTDQSALLSLKAHITSDPYHFLSNNWSSTADAASICDWIGVQCSLRHHRVTAL
NISNMALIGIIPPELGNLSFLVSLDISGNYFHGNLPEKFSHLRRLRLLSMKLNNFSGEVP
MGLGLLWELQYLSLSNNSFVGSIPSSIFNLSNLESLHVQGVIPPEIGNLRNLKVIIMQDN
QITGSIPAHIGNLTMLNLVVFSNNSLTGVIPDEISNLQELNKIYLRDNWLNGSIPSGIFN
HSTLAVIVLGNNLLTGKPAPNIGYSLPNLELLEVSRNNLGGSIPASIANSSKLTFISFAR
NRISGAVPDFLGDLRLLQILSLQENNLTSEPLSSELGFITSLTKCKNLSHLLLHKNPLNG
VLPVSIGNLSSSLAFFYASSCNIKGTIPREIGNLSNLIGLTLEDNHLTGLIPTASGDFRS
LQVLSLSQNKLSGTLDSSCNLRSLSDLYLVNNQIRGSIPECYGNMTSLRRLELGNNLLAS
AVPRSLWNLKDLLRLNLSSNSLTGSLPQDVGNLKNAIYMDMSMNQFSGDIPSTTGNLQNM
LYLSLAYNKFVGSIPESFGNMLSLDSLDLSNNNLSGLIPKSLETLQSLRFFNVSFNHLKG
EIPSKGPFKNFTSESFMFNDALCGNPKFHVPQCQTNSPHVSRVRKVGLPIFILLGIAALV
AVASAFIYTSYCKKDMNVGVGVRVNNSVQKQKNGVDKNGGCWVEGGGWLGVSKRAFSDDE
RLEQGVF*

>g22487.t1
MSQKGRGSPSFQSIKSLPVDFRLVGSPNSQHLEKSNGGNVSTGGVKSERIAAVNGEVMGD
VMEDVNHNVDVENDESPYSSLSLSAEERPSAVDDDLNSESSSLQSTGPSRVESKWSDTKS
YSAKKKLQSWFQLPDGNWELGTILSTSGTEVVISISEENVLKVNSDDLLPANPDILDGVD
DLMQLSYLSEPSVLYNLQYRYNRDMIYTKAGPVLVAINPFKKVPLYSTDFIQAYRGKTID
SPHVYAIADTAMREMIRDEVNQSIIISGESGAGKTETAKIAMQYLAALGGGSGIEYEILK
TNPILEAFGNAKTLRNDNSSRFGKLIEIHFSETGKISGANIQTFLLEKSRVVQCTEGERS
YHIFYQLCRGAPKSLREKLHLRSWDEYKYLSQSSCYAISGVDDAEQFRVVLEALDVVHVS
KTDQESVFAMLSAVLWLGNITFNVVDNENHVEPVEDEGKISQDNLTHNLLDCISVSFACS
SFC*

>g58698.t1
MGSSGGTNFGTDTYESLEREPYWPSEKLRISITGAGGFIGSHIARRLKTEGHYIIASDWK
KNKHMTEDMFCHEFHLVDLRVMENCLKVTKGVDHVFDLAAEVGGLGYIQSNNSAIMYNNT
MISCNMIEASRINGVKRFFYASSACIYPEFMQLDTNVSLKESDAWPAQSQDAYGMEKLAT
EELCKHYNKDFGIECRIGRFHNIYGPFGTWKGGKDKAPAAFCRKAITSTDKFEMWGDGLQ
TRSFTFIDECVEGVLRCEMVSMNEMEEMVLCFENKQLPIHHIPGPEGVRGRNSDNTLIKE
KLGWAPTMKLKDGLRITYF*

>g27272.t2
MGKSRSGTMACNKSFCSNYMLLSPEKAGLIDLICFLFSSNIDKRKFVDSPKGTKMPFAPR
WLICLTIVIQKLLQLLTKPMACLGNLIEQGLNLLYVNTNIFVLIYNIIKGQVVSIPDKTS
AKYMSLLAFLDLRRELDENIESGDSRYNPHLSIMASKVAYENKAFIDSTVTDYWDMDFLE
FYDFWNDYLEKSATQAFLFRKDPKTDSELIVVTFRGTSPFDLQDWITDVDLSWYEIDGVG
KVHAGFLKALGQQKNNGWPKDLTQTGHDYAYYTIREKLRDLLSENGDAKFIVTGHSLGAA
LAILFPAILAYHGETSLLERLEGVYTYGQPRVGDEQFGEFMKKQIDNNLLPNYYRTVYCN
DIVPRVPFDNSLTEFKHFGTCAYFNSLYNGKIVDEVPNNNYSLLWFIPMFLNSVWELIRS
FIIGCVLGSDYRETSLMRFFRVLFLLFAGLPAHCPFDYVNSTRLASTDLYSGSSTNGKTK
NERTTKLDSLV*

>g28125.t2
MNATSSLLQLWQIPSTGLFFRCSKLPKGVAVMSCSYLVPKMVRNPVPCFYKCMQSTSYEA
IVHGSYVPTAEATQKNDVKEKASTAAENIGAFQKLPMVMPSVDILYSAVRKAKRVPPTKG
IANVAKRERNRGAKQLDALMKELAIPLRTYQENFPNKKHLHPYERSLVELTLGDGNYEEV
MGKVEALRKKVVSVGKEHASICAKSSSKREAEDRLSEGMKKLEEIFHRQGKAVDELLNIA
KILRAMPVVDLETPTLCLVGAPNVGKSSLVRLLSTGKPEICNYPFTTRGILMGHITFSYQ
NFQVTDTPGLLRRRDEDRNNLEKLTLAVLTHLPTAVLYVHDLSGECGTSPSDQFIIYKEM
KERFSNHLWLDVLSKCDLLQESPVVFVTEDVNSDDCELAKYRKMGPDGALRVSVKSEVGL
DELKSRVHELLASQFMRIQNKSNQENLEVNV*

>g31582.t1
MSLMNSSATWVQSPSIYNFASSRSNSVNSYLYHPLKNKVPLSFFLPNPITKPVIPCSSFS
ISAILTKEQANAPQEESKSKKDQIFSPSASFNFKAYMLEKADSVNKALEEAVLLREPLKI
HESMRYSLLAGGKRVRPMLCLAACELFGGQESVSMPSACAIEMIHTMSLMHDDLPCMDND
DLRRGKPTNHKVFGEDVAVLAGDALLAFAFEYIATATKGVPSERIVRVIGELAKCIGSEG
LVAGQVVDICSEGISDVGLEHLEFIHVHKTAALLEGSVVMGAILGGANSEQVAKLRKFAR
CIGLLFQVVDDILDVTKSSQELGKTAGKDLVADKTTYPKLIGLEKSREFAEKLNKEAQDQ
LAEFDPEKAAPLIALANYIAYRDN*

>g50566.t1
MGRKSKETMRKAHLHVRAKIREVEKPETWKLSSAAAIVINGEKLVVANMGKYKAVLCAIR
RAKVRFAGRDSGTARVTKPSKSSELVVGSQRIDSGTEFVILASTGIWEVMKHQEAINLIR
HIEDPQEAAEWLAKEALTRLSKTVISCLIIRFDLHY*

>g48814.t1
MKTRKIVQQLQPSASLSEGSFVEITSDEEGFKGACYEVLHAHKAMLAALGVLFPDILDLS
GIFHFTESLWRLVGYTKLKSM*

>g20296.t1
MTEHKRHGRINELSKLLNCIDRKLGSSDSNSLSSVVVDACINLGWLETAHDILDDFKSEG
SPLGRDLYLSLLTAYYNRKMSKEGDALLKRVRKAGMLMDLSDEMVMSKHSLQLESKRTLS
FGKINLIGKSDFVESIIQDMKEEPKYIPASAMIHELNSSIYFFMKAKMIGDALKTYRKMQ
EMMIQPTVLTFAYLINGYSCLGMYREITVLWGDIKRNLEKSNSMVYRDLYESLLLNFIRG
GYFERVMEIITFMTESHMFLDKWIFKTEFLKLHKDLYRSLKASDTRNEVQMKRLKHVQAF
RNWAQIK*

>g44519.t1
MEALGNIALDKWRGYSNLDDNVRLLETKLQRLSCKKFDIELHVKNAERSGTKKRKREVEN
WLQEVQQIINEFSQLKKRVQEGALWRNVFSSGDSVAKMEARVEELMNQNFDGLWLDDCEN
RSKPRVTTRLFGEKFDLGLKRIWAWLVTDNISNIGIYGMGGVGKTTLAKHIHNYLIEKAI
FKVYWVTVSQGFTIKKLQDDIAKVVRLDLSNESDEDTRATILSGALGKQQSVLILDDVWE
YFCLKNVGIPVGTKQCRMILTTRSLELCNRMGCQRKFEATCLNTDEAWDFFKYTLGFETI
LTAEVEETARYVAKRCAGLPLGMITVAGSMRGVSDICEWRNAWEQLKACSIGHDEMERDV
FPILEWNYSRLNKYQKHCFLYCSLYPEDHKIPREELINLFIWAELMESRDTRKLEFDQGH
TILNKLTRVCLLEEATDVYGCECVKMHDLVRDMAIRITSGKSTLSTADDVLRFLVKSKGA
KPKEWTEDLDAVSISYVEVAIPQGISPKCLRLSTLLFPSGRIKTIPDSFLRHMGGLEVLN
LGNCHNLMELPNCVSDMVNLTALLLRYCWKLSSFPPLGKRKQLRELDVSHTAIDNVPQGL
AELENLQQLDMHGTRLKNIPRGTLAQLQELEQLVLPTSVQFCDPESFDEDYCFNFEGGCC
NMRKKELIFHGYNFWRGFDVASLPKDIQRLEFHECLNFLEVIQTLNFSSNVSSLATRKSD
EVQFLLKFCSPQPDELIVMPQQLALDTCSSLKIMEISFCPKLKKLFTVRLLRKS*

>g63252.t1
MEDALKSGQETQEKSLNMKGKGGFRAASFVYALLSLENMGFVANMVSLVLYFQFQMHFAV
SAAANVVTNLMGSTFLLSVFGGFISDTYINRFKTCLIFGTIEVAALLLMTVQARYNDLQP
TCGKSSCLTGGIAVMFYASLVLLAMGSGGVRGALPALGADQFDQRDPKESKALATYFNFL
LLSVTVGATFGVTFIVWVATNRHWWPGFLISLIATTVGFIILAFGKPFYRLQIPGESPLL
RVIQVIVVAIKNRSLPHTSSPDELYELNEKESSISIYQKIQHTEQFR*

>g28176.t1
MGKDGDDTQDKGLLSHLAAYGAGYFTPHHGTYTYPPPSGYPSTGYFPPAGYAPPQGFYPA
AYPPPPGYPPSAYPPHGGYSLTGYPGPSAPYYFGNGSQMGPLMAGGAAAAAAAYGLHHLA
HGAPHCGHGGFYGHHHHGIFGKHGFFGRC*

>g71356.t1
MSENNQEEPQEFDIDDLFQFTMKKNWKEVLSVFKINPFACKAKLTKSEETALHIAVSSYH
ADRIDAKEHATIVSQLVDSIPPDQAAEILQAKNDKGDTPLHLAAALGSALICQCIASKDR
ELISNRNLKGETPLFLAAHHGKMKAFLWLHRFYNVSTAEPDDSLCRRKDGDTILHSVISG
EYFGKTLLFWLYFHSMCINPHPMIMT*

>g52413.t1
MATSNSKQFPIHVRSISLPASSHPLVVSAEEHLQRLKSSEAAPTCQKLDGLKKLDECLDD
VLQLPISQQALAPERCDKWEEDVLDGSLRLLDICGTVREIYSQMKESVQELESSLRRKRG
GEMADEVSNYTTSRKNLNKTIHKCLEELKSAGKICPLVENKESNTTPLVNLIKEVQVVSL
AVLESTLSFLSGSKAGSRPRGWSVVSELLHQKRASREADSDIAAIEKIQLQLHLLNNKKS
NKDGDLLQIQNVVKELEAFDSGIQELAEMLEIVFGLLLKTRVSLLNILNHYFRSQSAGLP
QSHAIQFCIN*

>g9072.t1
MESSPFKADVLKGKVALLTGGASGIGFEISLQFGKHGASVAVMGRRRSVLDSAVATLHSL
GIPAVGFEGDVRKQEDAKRVVESTVKHFGKIDILVNAAAGNFLVSPEDLSPNGFRTVLDI
DSVGTFTMCHEVLKYLKKGGPGRSSSSGGIILNISATLHYTAAWYQIHVSAAKAAVDALT
RNLALEWGTDYDIRVNGIAPGPISDTTGMSKLAPEEINSKARDYMPLYKLGEKWDIAMSA
LYLASDAGKYVNGTTIVVDGGLWLSRPRHLPKDAVKQLSRAVEKRSRATPVGLPTSKL*

>g51669.t1
MVEKWLSLLGSSKKLMPRQLQGNMGVFFQKFFACRNPLRRDIRLVAWERPKHGFVKLNTN
ASLRDGMAYGGGVLRDANGNVIATFYKEFGEMSILMSEAWALRFGLKLCEQHSFTNVLVD
LISSSRMGHWSLYYVLVDIKLLLKKVVGSLVHIFRQVNTVAVSLASLQLEQDRIVSTEDL
PVSVIRLIRIDKIGTPQIRVCTF*

>g42473.t1.1.5bbdf934
MESANIPHHHHHHYQHHTLQDQLIVDSSTTTTTLDLSGYAAASAPAWTPNTILNNGGFNS
AANVAILSSRNPRLQHDLLVPSLHDSMTQDFSFDWANNTSGNNFINQSSHDYSLQLARIK
RELSDSYTHFSEMISSPLSSVEDLQVQMQPTRYRKNEPRDINDPYIKLLLRKLSSGSQNN
GLQYCPEESYCSTSSTSTPAATTRRGTFSQIHPTINVSSNFNQVSLANSSSFDMNLQALD
LLNSAAGFNGSFRQSMQDQLGLPKNGLSYGYDYVKQSIQMPIEPSKITPFSSGVAEAKSS
NINLEPKTTKRSRVESRASCPPFKVRKEKLGDRIAALQQLVAPCGKTDTASVLMEAIGYI
KFLQNQIETLSVPYIKSSRNKPGRAVHGGTMENGSEVKRRDLRSRGLCLVPVSCLSYVTD
SGGSIWPPPTFGGGT*

>g23907.t1.3.5bbdf93c
MLSAKRIKGFSDLWKSNSQSADITDSADVLQEIFVKNPCTIAGLILYNIAGPHVPEYDFI
FLSGETNINPFRSLTFVDGNSDIHRIWSCKGLLCLCIVRYEIVCSYDYYICNPTTNKSIK
LPDLERPRVARIISMTIAFDPHRSPFYKVVCVWIAGMVYRFSVYSSETKVWRDAHTSLEV
GNNDYYLFRRGVFWNNSVHWVSKLGPFLRFDMDKECIEMIPATDLPTARKQRRIRYFGES
HGHLHLIEIPERGIRFFNILEMKRDYSEWFVRYRVDFKKLGRILSENELYHGKFYILYIF
QLETEEDTFGLVLSNVVSTYLFLVSDNSCYSEKMRHFRYDLKDNIHYKWYNCHQHFMTLA
SV*

>g58559.t1
MAVEVAKVLYVVVVDGVAEKEKKETEEDSKRSSFRYTRSVLQSTLQLMGCKPRHGFKISQ
RAFEMIRSGSFGENLGTFVTEASGLGDLKVQSQNEDHVYSVLLDSASGVTQNVLEDDKNN
RQPFELYKRRTTVVIKREIFLNVVCDALAEYKYVGLNQRADLELACRIRERKASITVLLC
GTSGCGKSTLSALLASRLGITTVVSTDSIRHMMRSFVDEKQNPLLWASTYHAGEYLDPVA
VAEAKDKKKAKKSAGTLPFAKNDVVNGSAIRKSAFEGNSGITDLISPKQMAVEGFKAQSE
MVIDSLDRLITGWEERKESVVVEGVHLSLNFVMGLMKKHPSIIPFMIYISNEEKHLERFA
VRAKYMTLDPAKNKYVKYIRNIRAIQEYLCNRADKHLVPKINNTNVDKSVAAIHATVFSC
LRRREAGEQLYDPITNTVAAIAEEYRNQCAANSLSSKGMFQLIQRKGSSRHLMALLNNDG
SVAKAWPVNSIGDNGKSMLAMYGPLQIGKAEPVNLQFGHFGISAWPSDTGGTSRASSVDE
SRGELTDTGSRYHSSCCSSPRFSEGPAKELKEEDSVHGSDEEVDESPEVGSDEDISDGER
EIHEEMEGSVDEGSTKSDEEYDDLAMQDTQQNGYLSDEDNEFCNKLGPKTNLVDDSGNQP
SKKANELHEEKYKQNLYLFLRNNGEPLLEPPARSYFSPLREKNERMAPSSGNVRIRKRSL
SNPAALSGSLLR*

>g25830.t1_g25831.t1.6.5bbe1a05
MVAINLLGMSSALVHQPCDHQLIDSASLYLQQQEPSSPDPCAPDPPKRTIYSFCKILTAS
DTSTHGGFSVLRKHATECLPQLDMTQSTPSQDLIAKDLHGYEWRFKHIFRGQPRRHLLTT
GWSTFVTSKRLVAGDAFVFLRGSNGELRIGVRRLARQQSSIPPSVISSQSMHLGVLATAS
HAITTQTLFVVYYKPRTSQFIIGLNKYLEAVSNRFSLGTRFTMKFEGEDSPERRFAGTIV
GLEDVSPEWPDSRWHSLKIRWDEPATIRRPEKVSPWEIEPFAAVSSTDVANQPVTKNKRP
RPPDFSIPENTAVATASHWYPGVAQSFELSHLSNTNEVQSTSNQAFWPPKPKNHNSSLPN
SSSCCGSSFPFGGTWPSPLANGSLDHVSARSNLHDYDFSVSLWTSNGLVLDQVERCNRQE
NLSSCKLFGIDLRSNTKSLSPLEKEGPSTVTVPNDANNAAPPADASGGEFLKSCNEKKQG
QSDLLPKDAQNKQGCSTSTRTRTKVQMQGVAVGRAVDLVALESYHDLISELEKLFELEGE
LCPRNKWEVVYTDDEGDMMLMGDDPWP*

>g73716.t1
MVQEVKLHGFWPSPFVYRVIWALKWKGIEYDYVEEDLSNKTELLLQYDPVYKKVPVLVHA
GKPISESLVILEYIEDTWPHNPLLPKDPFERAEARFWINFALDKKHIFRSFFLAGEDEKE
GAAEQLLEALKMIEERALGDKKFFGGNSINLVDLIFSWFAYWLQPTEVLVGVKVLEPNRL
PRLHAWAENFKEQPIIRDNLPDPEMLLDYYSKMRANLMANPN*

>g24736.t1
MASSNLTSFLVLLFSIFFSTCFVITASSSSSPSTLDSHLSSTKDLCKSTPYPDVCFESLR
LSVSINISPNILTYLLHSLQSALSEAAKLSNIFPSTSGHSNIVEKQKGTIQDCKELQQIT
VSLLNRSVSQISSSNNRKSADARAFLSAALTNKVTCLEGLDSASGPSKPVLVNSIADAYK
HVSNALSILPKPGGSNGLIHRRLMEFPRWISRKDRQILQGSDNDNYYDPSKILTVAADGT
GNFTSLNDAINFAPNNSADRIFIFVRQGVYRENAEIPSWKPNIVLLGAGRDVTIITGNRS
VADGWTTFRSATVAVSGEGFLARDITFENSAGPKKHQAVALRINADLAAIYRCTMKGYQD
TLYVHSFRQFFRECDIYGTIDYIFGNAAVIFQGCNIISRMPMPGQSTVITAQSRDIEDES
TGISLQNCSILPTNDLYSNLATVKSYLGRPWRNYSRTVVIESYIDEHIAPKGWTEWSGDQ
GLSTIYYGEYRNSGPGAVTDNRVTWSGFHIMDYDDASKFTVSEFITGDKWLGSSNFPYDN
GI*

>g39885.t1
MEKSIFVQEPRDWIPVNTGESQVIAIAEFAVKEHDKKTPNELVFVAVVKGWKKGANYNLI
IKASNEKVPFPHPYEAVVYEDSSRHLQLVSFEPLITAEGASSDKVVALLKLWQGIENLKP
TEVNAAGEINGISHWEIVNPNDPIVIEVGEFAVDEENKNTGSRLVFERVVFGLMAGFLNF
DFYALLIQTQEGLCIALVFRASFVIVKTNVLLLFVKI*

>g45428.t1
MPSSTPTRPLGDQASKSESLGDLRVAIAGVLKDSTEEWKRRIQEAGGHFHPKIKKDTNCL
VVGGSLSDQDAEIRKARRMKLPIVREEYLVDCIKKCKKLPFELYKIEAVGETHSMVTVKV
KGRSAVHESSGLQDSGHILEEGKSIYNTTLSMSDLSTGVNSYYILQIIQDDKGPDCYVFR
KWGRVGNEKIGGSKLDEMAKSDAIDEFRRLFLEKTGNPWEAWEQRKNFQKQPGKFYPLDI
DYGVKRNLSKKKSFDSTTSRLAPALIELMKMLFNVDTYRAAMMEFEINMSEMPLGKLSKH
NIQKGFGALTEIQNLLSGTAHDPAMRESLIVAASNRFFTVIPSIHPHVIRDVDDLKSKVK
MLEALQDIEIASRLVGFDSDDGDDGDSLDEKYKKLRCDISPLSRDSEDYRLIEKYLQTTH
APTHTLWSLELEEVFALERDGEYDKFAPHREKLGNKMLLWHGSRLTNFVGILSQGLRIAP
PEAPVSGYMFGKGIYFADLVSKSAQYCFTDKKNPVGLMLLSEVALGEVHELTSAKYMEKP
PAGKHSTKGLGKNVPQASGFVKWRDDVVVPCGKPVSILKSSELLYNEYIVYNPAQVKLQF
LLKVRFHHKH*

>g10685.t2
MPTLNLFTNVPVDSVVASDILKDATKAVAKIIGKPESYVMILLNGGVPIAFAGTEEPAAY
GELISIGGLGPSVNGKLSSTVADILQTKLSIDSSRFYIKFYDVQRSYFGFNGATF*

>g66115.t1
MRFVILLLFLLLHSSQAAMPRRLPEYKALLSIKSAISDDPQSSLSSWNASTSHCSWFGVT
CDSYGRHVTGLDISGLNLTGILSRDVGHLRLLLNLSVAANHFSGPVPPEISSISTLRYLN
LSNNIFNLTFPPVLIRLKNLEVLDFYNNNMSGPLPVDVYQLTNLRHLHLGGNFFTGSIPA
EYGTFPNLEYLAVSGNELDGEIPPEIGNLTKLQQLYIGYFNAFSGGIPPEIGNLSKLARF
DAANCGLSGEIPPEIGKLQNLDTLFLQVNVLSGPLTPELGNLKSLKSMDLSNNIFTGELP
SSFAELKNLTLLNLFRNKLHGSIPEFIGDLPELEVLQLWENNFTGSIPPGLGTNGKLQIL
DLSSNKLTGNLPPNMCSGNKLQTLITLGNFLLGPIPESLGKCQSLNRIRMGENYLTGSIP
KGLLSLPNLTQVELQDNLLTGSFPETETTSTSLGQISLSNNHLSGPLPPTIGNFAGVQKF
LLDGNNFTGRIPAEIGKLQQLSKIDFNHNSFSGPIAPEISECKLLTFVDLSRNQLSGEIP
TEVTGMRILNYLNLSRNHLVGSIPSSIASMQSLTSVDFSYNNFSGLVPGTGQFSYFNYTS
FLGNPDLCGPYLGPCKEGIVNGTREPHEKRAFSPSMKLLLVIGLLVCSIVFAVAAIVKAR
SLKKASEARAWKLTAFQRLDFTCDDVLDCLKEDNIIGKGGAGIVYKGAMANGEEVAVKRL
PAMSRGSSHDHGFNAEIQTLGRIRHRHIVRLLGFCSNHETNLLVYEYMPNGSLGEMLHGK
KGGHLHWDTRYKIAVEAAKGLCYLHHDCSPLIVHRDVKSNNILLDSNFEAHVADFGLAKF
LQDSGTSECMSAIAGSYGYIAPEYAYTLKVDEKSDVYSFGVVLLELVSGKKPVGEFGDGV
DIVQWVRKMTDGNKEGVLKILDPRLPTVPLHEVMHVFYVAMLCVEEQSVERPTMREVVQI
LTELPKPANAKEGDSTPTESTPQASTVESPMDSKDHQRLPPQSPPPDLLSI*

>g39212.t1.1.5bbdf93c
MVKHNNVVPSGHFRKHWQNYVKTWFNQPARKTRRRNARQKKAVKSFPRPTAGPLRPIVHG
QTLKYNMKVRAGRGFTLAELKAAGIPKKLAPTIGVAVDHRRRNRSLEGFQANVQRLKTYK
AKLVVFPRRARKFKAGDSAPEELATATQVQGAYMPIVREKPSVELVKVTEEMKSFRPYDK
LRLERMNERHIGARLKKAAEAEKEEKK*

>g19086.t1
MARHKALLWLFAALFCMLSYSSSANSICRHCCPPNCPPYCILAKRHHCRSPPPPPPTKSP
PPPPPPKKSPPPPPPTKKSPPPPPPPKRPPRLPKWLH*

>g4717.t1
MDEGSLNNKKGQSQNPTPLVAAGSSSSSSSPVAARWRPSQLVFCPYTPVYDASAKSQTLA
VAVRRPLVARLTKDIVETYKLCSPQFRYSETLNPKRFLTTPSIGVFNDGYDNANSDLILT
VNYALVNLETQRRYVVKDILGHGTFGQVAKCWVAEMNSFVAVKIIKNQPAYYQQALVEVS
ILTTLNKKFDPEDKHHIVRIYDYFVYQRHLCIAFELLDTNLYELIKLNHFRGLSLSIVQL
FSKQILHGLTLMNDAGIIHCDLKPENILLCTSVKPAEIKIIDFGSACMEDRTVYSYIQSR
YYRSPEVLLGYQYTTAIDMWSFGCIVAELFLGLPLFPGASEFDLLKRMIKILGGQPPDYI
LREAKNTSKFFKFVGSINRGASGLDPTSRCSAYQALTEEEYETRESKKPVVGKEYFNHMN
LEAIVSKYPYRKNLAEEDIAKESQIRLALIDFLRGLVEFDPAKRWSPSQASKHPFVTGEP
FTCPYKPAPETPRMPVSQNVKVDHHPAGGHWFAAGLSPNTPGRNRVALQNSSHFQVLPYA
HASSYGSLGSLGSYNDGAVLGSSYGSYGDANNRLAFYSPIGPSAMNIYQQNGASVLGNSP
DARRIMPLPHGNGLGISPGNFAPMSLGTSPSQFISPGSYGQILSGSPGHYGPSSPARGNC
HGSPLGKVAAVGQYHRRKGWGYPGSVQSHEMASSPQWQGQLTDGTISSQAEGNSTVFGGS
LHLQPNSSVTTWRQQQGGCNVHTCQSIAHNLASTAVTLGPHPKLSVHDKLEASNALPDPG
DWDPNYSEELLLQEDNSDVSVVTSEFTKGMHLGQNLVSTDPIVGARRFNRMTNSSANMSA
QRSSAGLTLGEGSSAHDAHGGYVNPMMKTSYLLPHFSQSSPSRLGQQPVQRMNHGKWNHS
KVQAPLSSFNSGGPQSPGSVGIPWGRRSSHPVANIPPAHHERKDYGRIA*

>g40684.t1
MDYTISVSENKASLREVIISKPSLVELIISNRSLSSGDIVISESEAIQLELRTPLDAHLL
WIIIILRLNLERKSKCYQDPSVRSLFMLNNVHCIFQQINGSALLTEIIGENYLNKLAKDV
QELMISYLSGTWYGLLHCLRHEGLNVCWGFSCGSKLSKKALKKRLKTFNTLFGKIHETQR
MWEVPEIELRDELHRHILDYLIPLYEDFLWKFRSHIDRGKHRERYIMYSANELKEKVSSL
FSSRSFV*

>g1973.t1
MERFTENILLGYTPQRSFEISMKISDANSDTDFSDVFGGPPRRFSIQETRRSYSFRETRV
ESEEDTVLPRNTWSGLNEKPVFGEEGVSRSPYRSDDFFDDIFKGDELKSRRTSRDFFASS
PSLRILSPSRPLPHKAEPFSPSFPAQFSLPAKLTKATDFPLFGSINRSPYKNKDDCSNRI
SCEQTPNAAPSRFASQATEVQDDERDDRPFYRKSNLSREVSHSHQESSYEGKTDKKDVDA
KSKEVPLNSGQFHFSIYKWAGSGGPLSMPPGRQNKLRFKERFKTERCSSSNGRIESDSID
GHLPTVEEHIISLHTESVSLKISNGKHEESSKEKKTESCSDVKEAQVAIPEPKFLRHAIQ
QGEDFSRKKTEESLTKREMTVYDKSKKETNVNKGQAPKTKLKSLHAQLSDENQVQGEGNA
IEGKEKKAKITNIANNDANLSNSAKKTDAERSVSNTSEATNVNLQSSVINSGDAFGSSSA
KGKVREFVKIFNQETSAKPKTNFGSQSSRWNGMKINETENWMSNVVKTSEKVHKLNKVPD
TSCREEDNFNKNKVKQESHFKNSAHENSGLSINEKNASTFSDSLPNDYDNKFESRDESIH
EYFLVEELTEVEDKKLQTSGDSEDIKVSSSTHQDFQNVQGAVFDAPIIACRLQLLKFNSG
QTGGKEISTHCCQLYN*

>g6364.t1.5.5bbdf940.6.5bbe1a08
MSRGARVMAAPGSRVILASCSSPNTDMNIHSHTLKLSTNATRKEYSKSKGQRLVLRPGAS
LSSRQSVVTAEEPPTESSSRQLPPHLSSTTKRPQEEAAAAGRFVSTTSTSLIDYFQVSRE
LLIRSKADGGPPRWFSPLNCAGSSASPLNFKKDTTPLLLFLPGLVGVGSGLLLQCPKLGE
IFEVWCLHIPLLDRSSFSDLVKLVEGTVRSQNSHRPQTSIYLVGESFGGCLALAIASRNP
DIDLVLVLANPATCFSKSLLHSLLPFSQVMPQQMNLSLLYMLSLASGFPSRMAMDALHKS
LPLEQTVGEFSLAAGEVSSYISEDGFDLVKVIKGASFYQRGKCIDYVSDYLPPTPSEFEQ
IYEPHRWTEVACNPVMLSTLENGKIVRGLSGIPSQGPVLFVGYHMMLGFDLIPLVARFWM
ERNIVLRGIAHPLAFKKEKNGKLPDLSTYDAFRFMGAVPVSATNLFKLFSSKSHVLLYPG
GMREALHRKVIHNVSSSINPFRLSIVMGILCALL*

>g56973.t1.1.5bbdf940
MPGTIQVSVMEFKGLPSTLTPIFLKVSLGKKEYQTSVEGDFSFPLTTLRDNLVVTLVDAE
GNEIALTGIQTISIVQKGSWDEIFPFDRGGHVHLKLQFILNEEEQNLIYSKRQGAVNSEI
ASAVCSSVTSSPRAEHKVLG*

>g70846.t1
MPPLQPPQTPFPDFPIAISPPPPPPPPLTHQQIHHGHSSTVVPPILAATIAVAFFLLFAV
IYRKLSNKRTAPVDLKPPPLPHRFSYSVLRRATLSFSADNRLGQGGFGSVYKGILPSGQE
VAVKLMDASGSLQGEREFHNELSLASKIDTTCCPHVVSILGFSSDDHSSRHHYPGRRRRR
RRLVLVYEYMQNGNLQDALLYRKCPELMLWSKRFSIISAVAKGIEYLHNSCDPPIVHGDI
KPSNILLDSNFDAKIADFGLAQVLSKDENEIVESLVEDEERIEKGKKDGGIENGEDHGSI
IEEDESVMTEEVVINVDQSPESCCVRILDGEMGPVSPGVGAAEASPFEGLDNKTSISEGC
FDRVSVDSENRRAIGRRKSESGRDWWWKQDNVNGGSESGRIKDYVMEWLGSEIKKERPKK
DWIATPSTAEKGGAKVDQKKQRKKSEWWASLDEEKIRKERKNRKPREWWKEEFCEELTKK
KKKKDVKSENGEETWWQRDEDVVPDRKKKRKNRGSRSSIDWWLDGFSGEFRIGRRNSQDW
ASGDIPKSGGISSTPSMRGTVCYIAPEYGGGGQLSEKCDIYSFGVLLLVLISGRRPLQVT
ASPMSEFERANLISWARQLAHSGRLLDLVDTNIQSLDKEQSLLCITIALLCLQRLPNKRP
TMKEIVGMLSGESEPPHLPFEFSPSPPSNFPFKSRKKAR*

>g62023.t1.1.5bbdf936
MVFSETLQGILSRICEEEFDLGSPCTQRILIDILNLLFVPGFFIILIGGLMKKINIRLQR
GDWITTAISICCALTSIAYFSFGLLNLSGKSSEFNRRSWLSYLVRGLIWITLSISLITRG
SRWIKFLISAWWVVFFLLISALNIEVLVKTHHAEIIEIVAWLANFLLLCCSFRTFRLFIF
HPTLEKSTLLEPLLHKEVRGQNHFSLSKVSFFSKLTFSWINPLLCIGNTKTLALEDIPCL
GSEDEAMVDYEKFYKKWSSLQMERDSSKAQNLAFLAIARVYWKEMVLAATCALVRVVAVV
LAPLLLFAFVRYYNCETRSIHEGVILVASLVFVKVVESLFYRHLLFYSRTTGMKMRSALF
VAAYQKQLKLSSLGRQRHSTGEVVNYIAVDAYRMGEFPMWFHVGWSSGLQLLLAIVVLFV
VVGLGVLPGLVPLLICGIINVPFAKIIKKCQSEFMNAQDKRLRVLSEILNNMKIIKLQAW
EEKFKTLIESYRENEFKWLAESQCKKIYITLLFWMSPTVVSSVIFFGCILLKSAPLDAST
VFTILAALRSMSEPVRLIPEALSALMQVKVSLDRINTFLQEDESKQEDEVRSHLSELDLS
VHIQDGNFSWDPDSATLTIKNLNLDVEKGKKIAVCGPVGSGKSSLLYAILGEMPKMSGNV
NTDGSIAYVSQSSWIQSGTIRDNILFGEPMNKVKFEEAIRFSALDKDIESFDYGDLTEIG
QRGLNMSGGQKQRIQLARAIYRDADIYLLDDPFSAVDAHTAATLFKDCVMSALVNKTVIL
VTHQIEFLSEVDQILSLICSLYTKAIHLSSMEVMDGGQIIQSGSYKELLAARRAFEQLVV
AHRNAITLSNSLTKNKEEPLQANGDGLEVKEKSEGEISMIPGVQLTVEEEKETGDIGFKP
FLDYIYVSNGLLLLLSGAITAAGFFIFQAAASYWLAFTIQTVEINIVVIISVYALISTLS
AFFIYLRSLFAALLGLRASKAFFSGFTNSIFNAPMLFFDSTPVGRIFSRASTDFSVLDFD
IPFVYATVMVSGIEIVATIGVMASVTWQVLIVGILATVASKYIQGYYQASARELMRISGT
TKAPIINYASETALGVATIRAFNMSDQFFQNYLKLVDTDAKVFLFSNAAMEWLLLRTEAL
QNLTLFTAAFLLVLQPKGTISPGLVGLSISYAFSLTAAQVFFTRWYSTLANHIISIERIQ
QFMYIPPEPPAVVEDKRPPSSWPAKGRIELLDLKIRYRPNTPIVLKGITCTFREGTRTGV
VGRTGSGKTTLISALFRLVEPYSGKIILDGIDICSIGLKDLRLKLSIIPQEPTLFRGSIR
TNLDPLGIYSDEEIWKVLEKCQLKDAVSCLPHLLDSSGKSLQDTIEMASTISIPLLNQQY
CTSISHF*

>g48580.t1
MVLAREKYVGKLLRALRSITIPKEVTGVGACRAFSAGGGKAKKGSKGGVTADAPKESLLG
KEVKSTTVVGANILKDGVDPKIFPDSEYPDWLSHLLDKRPALSELRRKDLETLPYEDLKR
FVKLDNRARIKENNSIKAKN*

>g19818.t1
MIWFRGGNCDGNWSWFRLCGAPVNPRPKNQDNSGHSEQTGRWVDIVKCLLPHEIFQAPAI
GLPRRDDVRKDIKPSEPAQPLRKFQIGKMNRARPGSCIHVPIYIGSSDDEASTVTFQTAA
SAVHGVVNQDTLECVEGVVNSHANATMTFQTGDDNGEYGETVPIQTNQIPFVIDLTSNEE
MAERVSPRLSTGGRGCTMNMPNEPLGSQVQGNDARLPEPASIGGLRRSTRKRNQVYYYEG
PITFPRKLPRNGNASEKPRKSGSPKKKFTCLKIRASNYPF*

>g19387.t1
MVDCSCSGPDRTPLSWRTRIQIAIDVANALEYLHFYCDPPLCHRDIKSSNILLDENFVAK
VADFGLAHASVDGSICFEPVNTDIRGTPGYMDPEYVVSQELTEKSDVYSYGVVLLELLTG
RQAIQDNKNLVEWSRVYMTSESMLTELVDPRIGDSFDFEQLQTVVAIVRWCTQREGRLRP
SIKQVLRLLYECADPLHSGFVEAVEGEGYNILEERGRMSGKLHRGEGIFHSGDGRCLASS
SSTSRSHCSRSFLLETSSPQSPLNIPSI*

>g8575.t1
MIKAEKEAMNCIYKNPSASIEARVQDLISRMTLQEKLGQMTQIERSVATPSIIKDLCIGS
MLSVGGSGPKEMASTSDWANMVDYFQKAALESRLGIPILYGIDAVHGNNNVFGATIFPHN
VGLGATRDAELAKRIGVATALEVRASGIHYTFAPCVAVCKDPRWGRSYESFGEDTEIVRN
MTSIVTGLQGQPPDGHPKGYPFVAGRNNVVACAKHFVGDGGTDKGINEGNAILSYDDLER
IHMAPYLDCTSQGVCTVMASYSSWNGMSLHASHFLLTQILKEKLGFKGFIISDSEGLDRL
SYPHGSNYRQSVLSAINAGIDMVMVPFRYHLFLNDLTYLVQSGKIPIARIDDAVERILRV
KFATGLFDYPLSDKSLLPTVGCKLHRELAREAVRKSLVLLKNGKDPKKPFLPLNRNAKKI
LVAGTHADDLGYQCGGWTATWEGKSGRITIGTTILDAVREVIGANTEVVYEQNPSAHTLG
SQDFSYAIVAVGEGPYVEFGGDSQDLPIHFNGSEIINLVADMVPTLVVLVSGRPLALEPS
ILDKVEALVAAWLPGSEGGGITDVIFGDYEFHGKLPMTWFRNVDQLSTNAGEKSCDPLFP
IGFGLSSKGEVL*

>g4229.t1.1.5bbdf93b
MNTLLVLCFALVLILGSFEANGKRVSFQDRQLLSDANLGRKLIAGPVDRKAAQNPEANKA
NNGAATAQAGEVYKYDDGYEQDSGSESHRYFPCVSKKSNQCG*

>g1085.t1_g1086.t1
MKSDMPLDYALFQLSPKRSRCDLVVSSGGKTEKLASGSVKPFVAHLRVAEEQVAMSVNSI
KLEVEWQKNAGIWFTKGTLERFVRFVSTPEILELANTFDAEMSQLESARRIYSQETGEQL
AGAGRAGSGVTAAADATKKELLRAIDVRLLAVQQDLTTACARATAAGFNPETVLDLQMFA
DRFGAQRLNEACRKFIALCQRRPDLILTWKGGGDDRAVRSSYGSDMSIDEEPTFPEGLPI
GSRQPLRHEQQHSTGQQEEEADAFHKHQHSNFAPFKPPSLPLRRSRESSVEPQETSNQND
HPGAEKEEKEESSRDGRPPDQAQSIAVSQPSRRLSVQDRINLFENKQKENSGGKPAVGKS
IEIKRLPSDVASSASAAAVEKAVLRRWSGASDMSIDLSGEKEIESPLCTPSSSVSHSKSE
EQKDIVSSSKPEFQSVPVRVDDNAGSAREKVVGPRQLTVSSDKSGEASEVGKSNSSLGAN
DGHAWKDQTRGKTQSRSFLNRAEDNSLNDQANSEPMFRSLPSSKAEEGNSDNQPKFKGSE
KWDEPLKIKGRILSEALVAGHKDKLTSWPKFGHFAGKGSDTGSAVNQCKPGEVGRSNQNE
EVGLSDKSFSQTHRSVPQRSVGDSTLQEGGSGSRTREAFAAQHKGVEARPSSSQPRFESF
VETEAIENKDWASAEKLSGGTAIKFEDTGPQRMKLEKHLDASEQIKKTQGRREDMVPVYG
SNKALFSNKVATENQMGFDSVTTPPPEHVQRIRQSKGNQELNDELKLKANELEKLFAEHK
LRGPGDQSNPTRTSRPVDRQSEPPTKPYKKLSADPAIAHLSNHSPLTEPAESSINMAKLN
DVSVEKTVGAHNCNDAVNKNFSELNLLDGSRGKFYEKYMRKRDAKLREDWSSNRAEKEAK
LKAMQDNLEWSRSEMKAKFSGSANREDSVFSARRRAERLRSFNTRSIMRRKQQHLDFGQS
DDDEDASEQEYNGEDGSFTETSIIDGLPKSAQSKKSLSTKSLSSSTPHMSAAPVPRSVTR
ASNMSGRRKLQSENPLAQSVPNFSDLRKENTNPSSATNRTTRPQLRNYTRSKSSGEDTSL
VKEEKSHKSQSLRKSSANPVEFRETSSLSSEGISLTTQKLDTDETEQSPYGKCSKTSESK
PFLKKGSGMDFRSRATIASQKTKMASNTTNDQHEYDNLAFETEDSVDLVKDDEEEEFETE
AAKHFGEPEQDQELLKVNFGSENGVLRCFAQVDPSLVAELDAAVPSGIHPSENEQDLLGE
SPLSWNLQTHHSFSYSHEMSDIEASVDSPAGSPTSGNSHSLSQTETDATRMRKKWGAAQK
PMVIANSSHNQSCKDMTRGFKRLLKFGRKNRGAETLVDWISATTSEGDDDTEDKSDPVNH
SSEDLRKSRMGSSQGHPLDDSFNEGEFFNNQVQSLRSSIPPPPVDFKLREDQLSGSSIKG
DSL*

>g4902.t1
MNLSRTTFWQAHAFRTPLSFHLPYPASPPYNGVVSRKDTKRRRFLTLAASNSLPELELPL
LPFPKDQVLVPCEAKKLHLYEARYLSLLEESLSKNRKLFVHFVLDPIAVNETLTEASFAA
RHGCLVSIEKVERLDVGALVFIRGIGRVKIIRFSQEEPFLCGAVIPLKDHVPPEATELNP
KVLELKETLQGLNSLEIKLKVPEEALLQTQTANSLNWAENTPAIDCDEAFIPSLAERISF
AALQHVSGSMQSELTELQKEKLKAMETRDTLERLGNSLEFVKNNISVVAAKLALQSLKVQ
*

>g58135.t1
MSKSKVHGKPSSFSRDKSLFVAAVAAILLVCVIWSFTEPLSNFPTLFSTDYCSGSSSQFF
DRGTDPQETTFYDDPEISYTIDNPIKNWDDKRKEWLKLHPTFAPGVQNRILLLTGSQPSP
CKNSFGDHLLLRCFKNKVDYCRIHGYDVFYNNAFLNPKMKTYWAKIPLIRASMLAHPEAE
WIWWMDSDAIFTDMDFKVPLRRYKHHNFVVHGWPNLIYEKKSWVAVNAGIFLIRNCQWSM
EFLDVWARMGPQSPAYKHWGQTLRSTFKDKMFPESDDQSALVYLLLKEKKKWGDMMYVEN
EYSLHGYWIGVVGRLDNITQRYEKIEKQVVKLRRRHAEAVAESYGKLWEEYLEDAGDRKG
GWRRPFITHFTGCQPCSGDHNPSYEGNDCWVGMERALNFADNQVLRNFGFVHPDLRNGSV
SPLAFDFSGADESEDLV*

>g40798.t1
MLTPDQARTLAGNDSVASVIESGEYKIHTTQSWNFLNLDSAPQYNRMPMDIRSDVIVGVI
DTENGPLESFNRTFFRSPRDGDGHGSHKASIIAGSLVSDVNLLGLANGTARGGAPSARLA
IYKACWFDICSFADVLLAFDDAIGDGVDILSISFGPNSPQAS*

>g1899.t1
MKKKTVVLKRDEHSKNSTNSSHTVRNVRYGECQKNHAAGVGGYAVDGCREFMPSGEEGTN
AALTCAACSCHRNFHKREVEAEVVCECSSPSSHGT*

>g1890.t1.2.5bbdf933
MLLVTIAPRAGRELGYVRFKMDHVKFREGMLSRQSLLDHITVQLAPRAADALWYGEDQLS
TIWAETADNARSAARTLVLGGLSDKHYGLNDFWVADRLNDIDSEALRIVNMSYERAKEIL
QRNKKLMDVVVDALVEKKSLTKHEFFNLVELHGSVQPMPPSIIDIRAAKRTESRDLITDQ
QEASLKSS*

>g45597.t1
MEEKSVSVAVAEMVNQSAHQPPQAVEDEDIPQSHHFNVLKEGQEARLMQHPRRPNLSSLQ
VPMRSLDNTSSFARIDIPSPNSTRNGLPPRPSSAKFMSSMKNLLPQKSTRGKNLSHDGEQ
TVLIIPDTPLSDKPSNRPSTSRSFSLNKILFSSSTTSTHSLPVTPAADVSPDGAEESNLN
DHCQLSKSEVEQQIRRSLSVPVNVKTRSLRRTDSSGGLIRVISATSHSRMEDNTLTDKST
DTEIACDDSGEDIPEEEAVCRICLVELGEGGETFKMECSCKGELALAHKECAIKWFSIKG
NKTCDVCKQDVQNLPVTLLKIQNPASVVRRPPVAVQQREVTRYRVWQDVPILVMISMLAY
FCFLEQLLVLLCSLYSITLFLEPPCFSHTRLCRMLLDF*

>g21191.t1
MGEAMNGGGNPLESARLAAFKESETLDGTCPKIEGYDFNKGVNYRELLKSMVCTGFQASN
LGDAIDVVNQMLDWRLSDERPTEDCSEEEKDPAFRESVRCKVFLGFTSNLVSSGVRDTIR
YLVQHHMVDVVVTTAGGVEEDLIKCLAPTYKGDFSLPGAALRAKGLNRIGNLLVPNNNYC
KFEDWIIPIFDQMLEEQTSKNMLWTPSKVISRLGKEINDESSYLYWAYKNNIPVFCPGLT
DGSLGDMLYFHSFRNPGLVIDIVQDIRNMNGEAVHVGLRKTGMIILGGGLPKHHICNANM
MRNGADFAVLINTAQEYDGSDSGARPDEAVSWGKIRGSAKTVKVHCDATIAFPLLVAETF
ARKGK*

>g41590.t1.1.5bbdf938
MFRSAAKRLIPALCRRRRIPDYCIRTAIPIVNNRPRFLTSATSETTPNQNPSHFDFQSSS
SSAKTAAGFNEGEKSHGHEHESQGSTTARPGRAQQYQDEQARVLQASLHHVIRLGWSEAA
MIAGAREAGVSPSIVGSFSRKEAALVEFFMDECLQRLIDLIDSGEDLRDLIPSARVAKLV
RIRLEMQAPYISKWPQALSIQAQPANIPTSFKQRAMLMDEIWHAAGDESADVDWYVKRTV
LGGIYSATELYMLTDASPEFRDTWAFLDGRIRDAFDLKKTVQEVAFIMFPI*

>g60293.t1
MADRDRAQPHQVQLRRYDGGLQAVLPKGPSPGQVLAVVALLPLVVTLIGLAGIILFGTLI
GLTVTTPLFVIFSTVLVPATLVVGLSVAGFLFSGTFDLTGLSSFSWVLNFFKSKYSSMVY
GAKFVQIGL*

>g9286.t1
MSENPTQESQEEAENGSKKLKPGRRTKPHDADDDNPIKNSKKVRNFKGITLANTKPSYCL
QRGIGNLHRDGESLRNHHRKKLRRLLKQLLRKQNWVDASGVLSVLLKGTAKEQSISRNRR
KYWATLELLPRIKGDNMNKRKMQNVYELWMKKLGPMKKRPTKDRFAAQWEFILFCLTRGN
TEDAHQAALCLVQEYGFESDAVSNLVVGLTFFQLWYSTIPKEMQLGELSKCATPMQSEMS
DGRFSLSIENSDGHDAIESQGTNFPLKCDSISSVGNGKDYFDGKVDQNREVSMDVDDKMH
KESPNCSFQAQDFYMNPAERSGDDEPACSFHGDDIPRTSIFYTHGLPPWLLPIQLPHSTE
NLENFIYMHRNSLNDHYKSALKYLRAALYSEPPAFEAFHPLIQMLLLGDHVEEALDEVQR
FSCNPDRALQLRLKTSLLEYFSDGNIAKLCTHVEDILKRDPTCSCSLTKLVNMHRIGYYN
TEKLVEMIAWHLDAALAKSSIWKEFASCFLMLSQSEEDQMSVCCNEDKHGKKKKCLYNVI
HIPSIFSNPESQYTWRLRCRWWQKRYYCQNILLSEIAAGDLQLLTYKAAAACHLYGREFK
YVIKATEHLEKEQNVDLLSILQTHIKNSVGFYLSIGKKNP*

>g67480.t2
MTSRPELQAPPEVFYNDEEARKYTSSSRIIEIQAQLSERALELLALPDDGVPKLLLDIGC
GSGLSGEILTENGHQWIGWDISPSMLNVALEREVGGDLILGDIGQGLGVRAGVIDGAISI
SAVQWLCNADKSCHEPRKRLMAFFESLYRCLARGARAVFQVYPENLAQRELILGYAMRAG
FAGGVVVDFPHSTKRRKEYLVLTCGPPSLSSATPKRKGEDEESCSNEGSSGDEENEMKVC
ISDRHRRMKKQKLNEKIKGREWVLRKKEQMRRKGNAVPLDTKYTARKRKARF*

>g64801.t1
MAAGATRKISAASARAHTRKSKNKSSIPFLPSGIFKKILAVFFMGFLAWAYQATRPPPPK
TCGSVDGPPVTAPRIKLRDGRHLAYKEYGVPKYKAKHKIVFVHGFRCCRHDAAITATLSP
DIIESLAIYIVSFDRPGYGESDPNPNRTLKSMAFDVEELADWLGLGTKFYVIGFSMGGQA
LWPCLKYIPHRLAGAALLAPVVNYWWPGFPANLSNEVYNQQLPQDQWALRVAHYAPSLTY
WWNTQKLFSPSAVVAQSPLLLSHQDLELVGTDSTREYEVIVLQ*

>g42264.t1.4.5bbdf935
MVERQAGNHFEGVPFYGARSDFMGHETSSRFAGTKRSNSDSYGGTSKDKFPPVRIESLEG
SQLMKLTRHASGERLRQPHDEDASFSMHFVRPMSATLVSQPSSGARADGNSSRLGRGIPM
NVGPPWQCPPRSSQVVPFGSQTPSNKVRDSNVGASVISQGAADEGSRTGIKGSGPFSSVN
TTGRILDRNFAGAIVSSGKQKSGIHISEPEFSPTRSQHGVSSTGCQMTIFYGGQAHVFDN
VHPNKADIIMALAGSNGGSWSTAYVPKTSASPFTGENCTPTSKNTPCMTGTLALQSEVQG
KSSVKVNYSHELSSGTHQEEMLKKEAKAVKHVLDLSAEEKR*

>g26339.t1.2.5bbdf93c
MNPCFPDWNTGAEIPVPTLKNKSLGLDRELVELLWENGQVVLHSQTHHHHHRPKPWLPQQ
QIDSRLINKHNQDQSITRGSVGEGSCENPPTGLIQDTETVSWIDCHVDDPFEKDFSSNFF
SEFPLSNPVEGLNEPDKCITKFEDYKSSKICASSEVNHRVSLPNNTNSANFSSNLSFPPP
FHAFDSAQQRDTHLGGGISKIADIPLSPKADFRPLNKGGSNRSAGGRDIKEYSVKTVGSS
HCGSNQVVNDHADTSRVSSCGIGDGGLSADVAKDHVGKLSSQSDRLQTETMETAITSSSS
GGSGFSFGRTCYQSTGTNSHKRKSRGIAEDSECQSKDDELESAAKKKQSLKSGSSRKSRA
AEVHNLSERRRRDRINEKMRALQELLPRSNKIMWMGSGMAPMIFPGVQHYLSRLGMGIGP
LPIPSVHNPMHFPRLPLVDQATLPNRAALFRTTMLNPINYHNQLANSKFAEQYANYTAFH
PLQNASQHMNIFSFGANTAQHNHMPPPSSNCNGTSSG*

>g2270.t1
MGSIPKHSLFCLKWPWDVRDQNPLSSKGCQFEAPWLFKSFRNLGFMAFDFVSNRSESPNQ
FLKNPIQLLDGIKQKSVRRKKILTSEEQGEAEQRALASALAAEKEATVIEFYSPKCRLCS
SLLNFVQEVESRNSDWLNIVMADAENDKWLPELLYYDIKYVPCFVLLDKHGRALAKTGVP
SSRLHVVAGVGHLLKMRRPKK*

>g33623.t1
MYSTGNAVVQACTFYVINKCPFPIWPATAPNQGQPVIANGGFYLPSGKIRKFQAPGDWSG
RIWARTGCNFDSSDHKSACETGDCDGQLECRGKIGLPPVTLVQFALQVDKRKPSFYDVSL
VDGYNLPVSVSTKPPSQKCSIGGCSTNLKNLCPQELKVLNNKGEIVACKSACLAFNLDRF
CCRNEFGSPDKCKPSVYSKLFKAACPYYYSYAFDMPPPLVNCASDEYVITFCPEQWGTAF
MST*

>g11936.t1
MQSILLLRIASFCVCALALTITAAQTNTTTTTTTTNNRANTTTITITKGANITKPGCPRQ
CGNLTVPYPFGVGVGSGCAIGSWFEVKCNTSFNPPKPFIGEIEIYEISDSQLRVSNVMAK
KCYNQMGALVHENIAWTNLKTTPYSFSELNKFTVIGCDDFALITGSDDRNFTSGCVSLCA
KAEDVQDGYCSGIGCCQTSIPRGLKYYFASLSTLKNHTTVFSFDPCSYAFLGEQDRFTFR
GASDFSDPNFMQRTLATVPIVLDWAIGNLSCAAAQKANDYACQAYSHCVDSDTGLGGYRC
SCNQGYEGNPYVSPGCQDINECADSNNNPCEKICINTPGSFNCSCPEGYYGDGINGGRGC
IAKNKEFPVIKLSLGLGFGFLSLLLGITWLYFGVKKRQLIKLREKFFQQNGGLLLKQQLS
SNEGGVESTKVFTAQELEKATNNYADDRILGRGGYGTVYKGILPDKRIVAIKKSRIMDGS
QIEQFINEMVILAQVNHRNVVKLLGCCLEAEVPLLVYEYVPSGTLFHHIQNSAMTWLSWE
NRLRIAAEAAGALSYLHSAASKPIIHRDVKSANILLDEYYTAKISDFGASRLVPLDQTQV
TTLVQGTLGYLDPEYFHTSQLTEKSDVYSFGVVLAELLTGKKPLCMERSQEERNLATYFV
MSMKENRLFQILEPRVVREGALEQLQATAELVRRCLYLNGADRPTMKEVAMELEGLRKFT
LRHPWANQHGHEESTNLITENEASDLYRVPMSPYSDTVPLSGQYSLDTAHTMFPANSPR*

>g27262.t1.2.5bbdf936.2.5bbe19fc
MSSVSPLEFSSLSSFLRTTSTAFHQQLPCLLLSQPGPKTFRSYLSSVHHLGSRKPFTVAA
GTTLTTNTVPARNGIYTVGDFMTRKEELHVVKPTTTVDEALEALVENRITGFPVIDDDWK
LVGLVSDYDLLALDSISGRTSEYDLH*

>novel_model_33_5bbe01de.1.5bbe19fb
MAFVNRIGNVLRQRMSKHINLEFSASNSSLYQTIRSMSSSKLFVGGLSYNTDETSLKEAF
SQHGEVIEARIITDRDSGRSRGFGFVSYTSSEEASRAIQAFDGQDLHGRRIRVNYATDRP
RAPRYDGGFGGGGGYNYGGGNSSYGGGGGYGSGSYGGGGGYGGGGYGGGGGNYGNSNQYA
AGDVRVDGFGGNNYGSGSGDGNIGNFGADGGNKCFGSDLPNQGSQGYDGNTAPQEQLSGN
QGETDTLDEDFGQDSVDGNYKDDNDEPNDYVNTRG*

>g39138.t1
METDRGDGRKANQLRPVSCTRGILNRAHGSASWSQGDTKVLAAVYGPKAGTKKNENPEKA
CFEIIWKPKTGQIGKPEKECEIIMKRTLQSICLLNVHPNTTTAIIIQVVNDDGGLLPCAI
NASCAALVDAGIPLKHLAVAICCSLAHNGRVRLDPNKSEEQVVISFLGRTFSIY*

>g48637.t1
MSGVSLSVAPRTEPDQRVTPRTKPRPKPLPHNQQEAVAAGIMGSLRVIELQLVAFIMVFS
VSGLVPLLDIVFPAFTTAYVIALSRFAFPSHGGTTGSQEIFHGSRLFRLYVVVGTTVGMF
LPLAYVLGGFARGDEHAVRSASPHLFLLSCQILTENIISGLSLFSPPVRALVPLLYTVRR
IFVILDWIIDVWFNKTLPANAEFQDIAWFWFGRGLAASNLVYFSINLFCFLIPRFLPRAF
ERYFKERDETHAKIEEEKRSAAMNKSQQADKKAD*

>g53161.t1.1.5bbdf937
MMENKQLNLSRPLLSVRRHTSTVASENDYKKNTIGSLSSIPRPPPYKSELKSGPVRNAGT
VPFVWEKSPGRPKDERINQTRAERLPAAPKLPPGRVLKANQQENDNASENLTVNKSQVGN
RLGSQNVSELNEYSTRLECAEDAVEEAEDEKSDSGDDDEVYEDALDMLSRTESFFLNCSV
SGISGLDNSDVNPSGTFFTDPQAREFMIGRFLPAAKAMVSETPQYAPSPKKQPVVQDNPR
QLKKVLNADKRPQLRYGPSFAKHYSEFHDNGEEESDDDYAEHGSLSTKVCGLLPRFCLKS
RLLNPLPGVSVRTRTPMSPATTLQARSSSASTCSKTENELSSVDMSEQRSIDGSQTTELH
EEKNDLNNKSSQISLKSQKFGLSANRHNGLSSYYNGSYASIDQRAFQPIPVEAQDARVDG
FSYGEKNYRSFRDLLADQSTSDEVCAGSPAVEKTLYIDTVHNGEAPKETCSFDIMVQSNL
KAKDDKSFTKIVDKNLSDDSSVVEKLSIVDGGDTLPNNFQEPLDFSLLSLADEPGQKVEK
DAPKPFGEDQNHYQDAVDSKNLELPVKQITQRFGKQIPKAEKVTNFHGIYVECPVPPPLP
KSPSDSWLGRTLPSMSSKNSSILSHHGTGIHPINQVSKTQFSDPKWETVVKTTKVHHHDL
RYSEELLAPIPES*

>g32031.t1
MEKQYADVLYALKENSIPIKLGLKYVQKIAKGSAPTFSVCKELGIFLNSMKRILDVLGPP
IEAQIKIWGSCISDGGTAIPGEHLSEVTVMLRAKLRTYLQAITEKLVENTKLQTATKLKK
IIQDAKENVAESDVRSRMQPLKDLLEKVIDQLYTQFDPQVFIIVSRGIWDRLGQDVLRFL
AERKENRSWYKASRVAVSVLDDIFASQMQQLLGNALLQKDLEPPGSILEVQSMLS*

>g75233.t1.3.5bbdf939
MAARSVWRARTKLLLAATAAGGGAGAALIMSSDDPASALKLSTAVPIRLFRDSVTAATIA
FDYQYSLWGLPEGSPERARVKHEVHIRGARRLQELCFRNGGVYIKLGQHISQLEYLVPEE
YVHIMRESMLNKCPVSTYDQVRKVVKKELGGNPEELFEEFDPVPVASASLAQVHVARTRD
GQKVAVKVQHTHMTDTAAADTATVDLIVNTLHRLFPSFDYRWLVDEIHESLPKELDFLVE
AKNSVKCMDNFRKLSPQIARYIYAPRVHWDLSTSRLLTMEFIEGAQVNDLKTIQRLAIQP
RDVAKLVSSWSSNFIIFSAKEGQKNII*

>g72666.t1
MANNQHVIPIPIDTYNLGFIGAGKLAESIGRGVVKSTVLPASRIRTAHRRPERRSAFQSF
GVTVLENNRQVVDASDVVILSVKPQTVKNVALELRPLLSENQLLVSVVAGVKLKDLQEWA
GHTRFIRVMPNTPAAVGQAASVISLGATATKEDEILVSRLFGAIGKVWTADEKLFDAVTG
LSGSGPAYIYLAIEALADGGVAAGLPRDLALGLASQTVLGAASMAITGGKHPGQLKDDVA
SPGGTTIAGIHELEKAGFRGILMNAVVAAAKRGKELSPS*

>g15679.t1
MARKILYFLFLYLLLTAAHAQLSTNFYSNICPNVESLVRNAVQAKFRQTFVTAPATLRLH
FHDCFVRGCDASIMIASPNNRAEKDHPDNLSLAGDGFDTVVKAKAAVDSDPRCNNKVSCA
DILALAAREVVFLTGGPFYPVELGRRDGRISTIASVQHSLPSPDFNLDQLNALFSGHGLD
QTDMIALSGAHTIGFSHCGRFSKRIYNFSPRNRIDPTLSLQYAMQLRQMCPIRVDPRIAI
NMDPTTPNTFDNAYYQNLQQGKGLFTSDQSLFTDIRSRNIVNLFASNKNAFQQAFVTAIT
KLGRVGVLTGNKGEIRRDCSRPN*

>g66640.t1
MPAKEKMGEDLLASLTMESNHLSTLLTMDSSSSSHEETERELNRAVNLLRPVDINLPLSP
EQSPPPPLWNDTCEVLEVGIGPQHYEAEANNNVTKIGKKCAKRLDSVWGAWFFFSFYFKP
VLNEKSKNKVTWENNGTNGYDKSDLKLDVFLVQHDMENMYMWVFKERPDNALGKMQLRSY
MNGHSRQGERPFPFSVEKGFVRSHRMQRKHYRGLSNPQCVHGIEVVRTPNLSVLDEEERK
KWMELTGRDLNFAIPSEASDFGSWRHLPNTDFELERPLPLKNNSSSHPKRLLNGSSLNLS
TQTSSHANGDGAEVLATCNKRKKNFFPHANDDDFCLPINSNQDKVLDIHAVEPSWLSEFT
GVMRSAYGPVTAAKTIYEDDEGFLIIVSMPFADLQRVKVTWRNTLSHGIVKISCVSIGCV
PIIKRQDRTFKLTDPTPEHCPQGEFIREIPLPTRIPEDAKLEAYGDPTGTMLEILVPKHR
VGPEEHEVHVCLRPSPWSERAYVDLTEALV*

>g26407.t1
MGSKKSDFGDGASPGKIFIGGLAKDTTLDQFVKYFGKYGEITDSVIMKDRHTGRPRGFGF
ITYADPVVVDTVIAETHIINGKQVEIKRTIPKGSAESKDFKTKKIFVGGIPTSVNEDELK
SFFSKYGKVVEHEIIRDHVTKRSRGFGFIVFDNEQVVETLLSDGNMIDMEGTQVEIKKAE
PKKPSNPAPAPAYGSESRGRSYGDGFGGFGSSYSSFSSGGFGPAPYRSFGGIGGRFGDYG
GYSSGGEFGRYGDFGGGDYVGYRGEPSLGYSSRFDSYAGGFGGGYGGSGLGAYGRGGGGY
GSYSGAGSGAGYDSGPGAGYGGTGGLYGSRAGYGGGGRYHPYAR*

>g30112.t1.1.5bbdf93d
MDASNHHSEDLQEKPSTEIKCFFDSTPPLKDGDEINKKLKEFVERNDSTSDSGKVTRVVC
VTSGGTTVPLEQLCVRYIDNFSSGHRGAASTEYFLKAGYSVISLYRRGTCQPYCRSLPDD
PLLEVLMFWMIPILKIL*

>g23220.t1
MAAGGGRSLQETPTWAVAVVCFVLVAISIVIEYIIHLIEKWLTKRNRKALCEALEKIKSE
LMLLGFISLLLTIGKGPISDICISESLGNTWHPCNRNQEHNTTDAEKEADGHRRLLAFSE
SSEGQRRLLAAAGYDKCAAKA*

>g34100.t1
MEVGSSILELVRKVLIKILMVYDDDVQSEQNNIPGDVEGNFVVHTIYNNGNTESFIMASS
YLIHRDFLNLLEQAEEKFGFKQRGVVAITCWHSDLERILGSTEWQEDVPLSLNGL*

>g5368.t1
MGNELYNHHLHQQSLYTKNTVLPLLCRVSIKDVKLREYKDRSASFSGDPASPKVSCTGQV
KKTNRFIGFSTPSKFTASSASCTGTTTASVTSPVAITSKTKTNRGDFNYTKIKRFFSGKI
LITSAAAATSTTTITNIKTAHGAGGRSRREIVIRRNGSRRSSKINNDHGCDHGCHNNNNH
VTVDISELDPPLPVIKKVQQPSEVNLWMRRSAGLALKTLQIEQIPVPKNNCPLASTV*

>g61324.t1.1.5bbdf941
MSAPIMDGHDTVTGHIISTTIGGKNGEPKQTVSYMAERVVGTGSFGIVFQAKCLETGETV
AIKKVLQDRRYKNRELQLMRTMDHPNVVSLKHCFFSTTSKDELFLNLVMEYVPESMYRVL
KHYSNIDQRMPLIYVKLYTYQIFRGLAYMHTVAGVCHRDLKPQNVLVDPLSHQVKICDFG
SAKVLVKGEANISYICSRYYRAPELIFGATEYTSAIDIWSAGCVLAELLLGQPLFPGENA
VDQLVEIIKVLGTPTREEIRCMNPNYTDFRFPQIKAHPWHKVFHKRMPPEAIDLASRLLQ
YSPSLRCTALEACGHAFFDELREPNVRLPNGRQLPSLFNFKQECQKPL*

>g19264.t1
MPIRQKKETSEQHFVIKPQCQSSMNSVQKNPKTAQNGKGPPAQETQNVKLHSQSSSPSTN
RGRRRGRGGRKSDHGDTFMRPSSRPCTAANKPILAEPARVVEATATNGCVGSESSNSSEV
DTSFPSSSKSLNFAPRPGFGQMGTKCIVKANHFFAELPDKDLNHYDVTITPEVASRNMNR
AIMTELVKLYKESDLGMRLPAYDGRKSLYTAGELPFAWKEFRINKIDEEDGVNGPKRERE
YKVVIKFVARTNLHHLGQFLAGKHADGPQEALQILDIVLRELSVKRYCPVGRSFFSPVIR
KPQGLGDGLEAWCGFYQSIRPTQMGLSLNIDMAAAAFIEALPVIEFVAQLLGKDAISKPL
SDSDRVKIKRALRGVKVEVTHRGSVRRKYRVSGLTSQPTRELVFPVDDNSTMKSVVEYFR
EMYGFTIQYAHLPCLQVGNQKKANYLPMEACKIVEGQRYTKRLSEKQITALLKVTCQRPR
DREKDILQTVHHNGYDQDPYAKEFGIRISENLASVEARVLPAPWLKYHETGKEKDCLPQV
GQWNMMNKKMINGMTVSRWACINFSRSVQDSVAHGFCNELAQMCRVSGMEFHPEPVIPIY
NARPEQVEKALKHIYHACMNKIRGKELELLLAILPDNNGSLYGDLKRICETELGLISQCC
LTKHVFKISKQYLANVSLKINVKMGGRNTVLLDAISCRIPLVSDIPTIIFGADVTHPENG
EDSSPSIAAVVASQDWPEVTKYAGLVCAQAHRQELIQDLYKTWHDPARGTVSGGMIRDLL
VSFRKATGQKPQRIIFYRDGVSEGQFYQVLLFELDAIRKACASLETNYQPPVTFIVVQKR
HHTRLFANNHRDRSSTDKSGNILPGTVVDSKICHPTEFDFYLCSHTGIQGTSRPAHYHVL
WDENNFSADGIQSLTNNLCYTYARCTRSVSVVPPAYYAHLAAFRARFYMEPDLQENGSAA
GQKGTRAAAESGVRPLPALKENVKRVMFYC*

>g60257.t1
MEMETIHLFFWAVKYTQGRSITRPSETEDVVIVFAELSTQETTDGLADSMAKLVGSLSWF
YLFLVHYQFTRYRKD*

>g77037.t1.1.5bbdf934
MAATTSGQGQFMTSSDNRSLANEPLIDNIEYDQIVVPDKKSWKNFFAYLGPGFLVSIAYI
DPGNFQTDLQSGAQYKYGLLWIILLASFAALIIQSLAANLGVVTGKHLAEHCRKEYPKVA
NFILWILAEIAVVACDIPEVIGTAFALNILFKIPIWCGVLITGLSTLILLLLQQYGVRKL
ELLIAFLVFTMAACFFVELGYAKPKSSEILYGLFVPQLKGSGATKLAISLLGAMVMPHNL
FLHSALVLSRKIPRSATGIKEACRFYLIESGFALMVAFLINISVISVSGAVCNSSDLIPE
DKQNCQDLDLNKASFLLKHVLGSWSSKVFAIALLASGQSSTITGTYAGQYVMQGFLDLRM
KAWIRNFLTRCLAIIPSLIVALIGGSAGAGNLIIIASMILSFELPFALIPLLKFTSSKTK
MGMHANSIWISAITWIISSLIMGINIYYLVEKLVTTLIHSHLRVVGIVFCGILGFSAVLI
YLAGVLYLIVRKPKKVDHLLPESMEMAMETGNASVPSLPREDIVNMQLPQRRTTSDND*

>g74660.t1
MESSSSQRQLITPEDVLESLMNDGTIDAIRLKIITQLKANEELKNTTIKMVEQSKVLNTP
GAEKQTKRELFDALRQELETSVLEKASKSVWELILDNNGIGKELNETVEKVFCRLSGREP
PLFPPSIDSQSEKGKEKETQDCAGQEQENMMDNSDSSTKKRKFDEMGTEEGTDEVASRSN
ASAPAFLDDSSRVPPPSAKS*

>g76250.t1
MNLTGNKPFYFTPQMEFGENSFGFYCPELQMCDKLSETNYSGADFLSSKKPRISESVLNS
SSGMSISSTFRLKQVRTINAKSEPCLLFKRGCCKYGTNCIFRHDETLEGKRLLISHFNGG
GCIVTDNQHGMMSRVNLCWFFMNGENCPYGNRCHFLHQDVKNVKGGLDVPREKVAVTVVS
TGAEEGKKNDGLDCKRIENVNSEANQIQQKSVLRKTRRCHKWERNGRCPYGVKCIYAHGE
RELHTLGSFRPLESGKSFLVENLTIDTENAASTKKETRVYKQQERSKKCLVKWNKIEKIS
GIYADWIEIMPTVHASPGIL*

>g71937.t1
MAKLAGIACVVVLMCTVLVVPHAESLLTCDQVAASVLPCIPYVTRGGTVPPACCNGIRGL
FGAAKTTADRRTACNCLKSLAGSIKGVNIGLASGLPGKCGVKSPFPISLTTDCSKVN*

>g71634.t1
MLAIFHKAFAHPPDELNSPASQHGKNKPKLPEETLKDFLSSHPNAFSLSFGDAAVLAYVR
QENPSLFHNNQRLFCGYDEIYCLFMGSLNNLCAEIKQYGLSKSSNEAMLVIEAYRTLRDR
GPYPADQVLKDLEGSFAFVVYDSQRGTVFTALGSDGGVKLYWGIAADGSVVISDDLDVIK
AGCAKSFAPFPKGCMFHSDGGLMSFEHPMNKMRAMPRVDSEGVMCGANFKVDLYSRVNSI
PRVGSETNWVDWSMEQI*

>g36579.t1
MVADKGKKQKIGEDDNNNNSDHIDGELVLSIEKLQEIQDELERINEEASDKVLELEQKYN
EVRKPIYDRRTDIVKSIPDFWLTAFMSHPALGELLTEEDQKIFKYLSSIEVEDSKDVKSG
YSITFNFSPNPYFEDAKLTKTFAFLDEGTTKVTATSIKWKEGMGLPNGVANDKKGNKRSH
TEESFFSWFTGSQQKDDELDEIHDEIAEIIKDDLWPNPLTYFQTDADEEDFDEEEGDDEE
NGSEDTEDDDDEPDDDEEDDNGDE*

>g8671.t1
MSSLNYVELGLNNISGSLPPAIGHMLPNLEILALGANKFSGVIPNTISNFTKLIVLDLGN
NQFTRSIPISLGSLSDLDYLNLESNYLASSSSRQLSFLSSLVNCRSLGFFSIQGNPIKGT
LPHTLANFSNSFENFYASLCEIEGNIPNEIGNLSGLSLLSLADNYLTGSLPLALKGLGNV
QVLELQDNKFQGYIPHYFCNLKELSTLQLSENQLFGQVPECIGNVTSLRYLFLESNRLYS
IMPASLGGLEILLYLDIHSNSMSGHVPQEIGNLNAAISIDLSHNKVSGNIPASVGGLQNL
INLSLAHNQLQGYIPESIENMVGLELLDLSHNNLTGGIPISMESLLYLRYFNVSFNHLQG
EVPKNGSFLNFTMESFMSNEALCGGAPYLKLPPCPINSTQGSKIKRLHLIAYVLLPIGLT
VFALVSICFVFMKNQKKKRILAQANLVPGILPERMSYYELQQATNGFNESNLLAIGGYGS
VYKGAPRDGTVLAIKVFNLCLEGAFKSFDTECEVLRNLRHRNLVKVISSYSNMEFKALVL
EYMPNGSLKKWLYSHNYFLNFLQRLDIMIDVASALDYLHHGYSFPVIHCDLKPSNVLLDE
EMTACLTDFGISKFFDGGENMKQTKTLATIGYIAPGILTSCCN*

>g69602.t1
MKSISRQFVSQLSYSSTTTSSHTTILTKKSCIELLKACKSMTHLSQIQAQLFILGLHQNM
DVLHKLMAFTADPSLGNLNYAQRIFNHIEHPSVFIFNVMIKAHTKMGNFRKALCSFDRLR
IHGLRPDNYTYPFVFKAIGELKLVQEGEKIHGFVLKCGDGFDCYVCNSIMDLYGVVGYVD
SLGKMFDEMRQRDVVSWNVLISGFVRCNRFEDAVGVYRRMRQEGYVKPDEATVASTLSAC
TAMRNLELGKEIHEYVRSELKLTVIIGNALLDMYSKCGCLNIARQIFDMMPNRNVVCWTS
MVSGYVSSGKLDEARELFERSPVRDLVLWTAMINGYVQFNHVDEALSLFREMQMQGIKPD
KFTLVTLLTGCAQLGALEQGEWLHACIEENSISIDAIVGTALIEMYAKCGRIEKSLAIFN
ILKDKDTASWTAVICALAMNGKSSKALELFSGMKQAGIKPDDITFIGVLSACSHGGLVEE
GRQHFDSMKKVYQIEPKLEHYGCLIDLFGRAGLLGEAEDMIANIPNKDDKIVIPLYGALL
SACRIYGHVDMGERIANILIQIQSTDSSTHSLLANIYASADRWEDVKKIRRKMSALAFKK
FPGCSSIEVHSNIHESIAGHVDERH*

>g36751.t1
MNLLTARADDELDVLIASADGLLRVLCDDNNRQFVRLEVEVRLLRTFVIYASNWRNADAG
AGAVELVPGGLGSLLLNVRYVFNRGRRYIEAARDLDSVKRTAAISVLQEEFVLLRPKVKA
AYERLMIISFHKHNSNNRNYHLWTESLKGNLLDICPVTQLHDPVVTHLCAMCGMLQDLGY
FCRNCPSEYTLLSTHFEAVLVRAASISYTCWVDTTRSDDESMSATRRIFTGMLLDLSNEF
KSDTPEVIQVCLKLLSKSSTGSRDETHSVWVQNLVKFLISEQDGVEILRYGLKNLILFLN
HGPNLYKKEVAAYVELLSEDITSALSELGRFLCSIHVNRTNPALAKLLVKIELLTLEVFL
MDLLKLEVNYRKKLLELDYHTRDFNQVLSFLRTFVGDESQWNIKYSKPVWARTEGLAWEA
FSVFKSFIVAITKDKVTVKLLNLLDRIKLFKMELFLEEELLNRDSSLMVNVKNEMEIVYE
GLILLGTFLLGPLDENGKLIRKHVESVAREVASICCSFHSSRVTGDRLRIFNYLLPDFAQ
KIKPVSAEIKEIYLQVRRSSRANFPKTDAFGFIDFLTENLRELLNSDDDLIAPVKCQIQV
VQREIEFLRSFFRDGTEQHKEHSDLEKLVSGCIQVAFEVEYVLDSFVVGDGFLWYHALWL
SDLIEDINLIKINASEITKKHGTSIHDGSQSLLKEIAPAKISKTDDVVIDLADQTELMID
RLTRGSLQRDVVSIIGMPGLGKTTLAKKVYNDPLVTYHFHIRAWCCVSQAYQKRELLLEI
LGDIVELTDNILELSDEDLEMELYQCLKRKRYLIVMDDLWSVEAWNGLERSFPNDENGSR
ILITSRLLDVASRTKSDSVPHPLRLLSDDESWILLQKRLFQTKDCPDELVSVGKQIAKSC
KGLPLGIVAISGLLKRTEMKPDWWKQVAQTLCSHIANDPEKMCMNILELSYRHLPYYLKP
CFLYLGAFVEDKEIPVLKLTYLWIAEGFIQTTGIESMEDTAGEYLRDLIGRSLVMVSKRR
SDGSVKTCRVHDMLRTLCLLRCEEDAFLQWNKWSDDPSFSHGDLDYGVDPNCCYPSNAIK
YERRRLCICSKRNHFVMSSPCGPHVRSLLYFAYSDLYPRCPYNLSFIPTNFKLLRVLDLE
SINMGHSFPSDIKFLFDLRFLALCGDIDSIPA*

>g57227.t1
MRRSLQLMLSASQLLKPNRSSILSPATFFTHLCSRHSPRNHKTTPFLSVRTLSVMASSGS
TDELVKGTIHPNGVAVITLDRPKALNAMNLEMDIRYKSLLDEWEEDPKVKCVLVESSSPR
AFSAGMDIKGVVAEIQKDKTTPLVQKVFAAEYSLICKIFAYKKPYVCFMDGITMGFGIGL
SGHGRYRLITERSVLAMPENGIGLFPDVGFSYIAAQSPGEGAVGAYLGLTGNRISTPADA
LFVGLGTHYVHSGKFGSLRDAFLENSFSEDPHEDIRVLLAKYSSNPESEPRLKLLLPRII
ATFSGSKSVQEIIEDLEKHQESGDALVADWAKDALQGLRKGAPFSLYLTHKYFSRVASAR
ERNDNELSTLPGVMKTEYRIAVRSSFRNDFVEGVRAVLVDKDQNPKWNPSSLQEVNPGGV
ETLFEPLSPEVGELSV*

>g12573.t1.2.5bbdf940
MEAAGRMATTFHFNCLLSVQATCGIPEIAFSTFENMEYGEDYMKPDTDTYNWVIQAYTRA
ESYDRVQDVAELLGMMVENHKRLQPNVRTYALLVECFTKYCVVREAIRHFRALKRFEGGT
KVLHHEGNYGDPLSLYLRALCREGRIVELLEALDAMAKDGLPIPPRAMILSRKYRTLVSS
WIEPLQEEAELGYEIDYIARYVAEGGLTGERKRWVPRRGKTPLDPDAEGFIYSNPMETSF
KQRCLEEWKIHHRKLLKTLRNEGPAVLGDVSESDYIRVEERLKKIVKGPEQNALKPKAAS
KMIVSELKEELEAQSLPIDGTRNVLYQRVQKARRINRSRGRPLWVPPVEEEEEEVDEELD
ELISRIKLEEGNTEFWKRRFLGEGLNENHSKSIEENDSEIIDVTDEADIVDDVAKEVEDD
EVDEEEEEVEQNESQAGDQVKDKEVEAAKPLQMIGVQLLKDSDQTTSSSRKSRRKVSRLP
AEDDDDDDWFPLDLHEAFKEMRNRKVFDVSDMYTIADAWGWTWEKELKNKAPRRWSQEWE
VDLAFKVIELGGTPTIGDCAMILRAAIRAPMPSAFLKILQTTHSLGYLFGSPLYDEIISL
CLDLRELDAAIAIVADLETSGIKVPDETLDRVISARQTKDGPSDDIAQ*

>g47521.t1
MSHCVPDFKMDEEYAIAIPTSSSSSPSLINTSRPLKKPAASGEEEIMELLWQNGQVVLQS
QNHRSFKKSPNGGSGGGGGGGEDEIPAQQLLQSTAREIRSLENENLISHHHHQHHQQQQQ
LFMQEDEMASWLHYPLDDSSFDHDLYSDLLYPPPPPSAPVTTTSPSTPPREICTVVTEIR
PLVPPPPGASLAMPLRPPIPPPPPPSKRTDATAGAPRIQNFVHFSRLPKGINESGGPSGS
SKDARELTVVDSNETPTVGPESRAADSTAQVSGGNVGCETRSCTLAAGTSTTARDLTTAC
EVTVTSSPGGSGSSVSASAEQQPPAPPAAAISKPGTSTADDRKRKGRETDETEGHSGDNE
IESADTKRQVHGSTATKRSRAAEVHNLSERRRRDRINEKMRALQELIPRCNKSDKASMLD
EAIEYLKSLQLQVQMMSMGCGMLPMMYPGVQQYMPAMGMGLSMGMDMGINRPMMPYQSLI
PGSGMPNPAVPANMGPRFPLPAFRMQPVPVPDSSRIQAPNQLDPMLNSLVAHNPNQPRIS
NFVDPYQQFIGLHQAQIPLPQNQMAVQPNKPSSSRDVGNPQNHQSG*

>g42353.t1.1.5bbdf93b
MICGARVRMSCLRLPYLPETPLLRPCSLPFNFHRRSRRLFSAFSPMDKKEKVIVISGPTG
AGKSKLALELAKRLNGEIISADSVQVYRGLDVGSAKPSLSERKEIPHHLVDILHPSEDYS
VGQFFADARQATRDVLNAGRVPIVVGGTGLYLRWFIYGKPDVPKASRNIASEVDTELADL
ERDGDWDAAVQLVIKAGDPSVKLLAANDWYRLRRRLEIIKSSGSPTSAFQVPYDSFREKL
DFHATDSPDIKSSFDGLHEDKLKILDYEFLCFFLSTQRLDLYRSIDFRCEDMISGDDGIL
SEASWLLDLALLPNSNSATRAIGYRQAMEYLLYCREQDGQSSARDFYTFLSAFQKASRNF
AKRQLTWFRNEHIYQWIDASKPLEKVLKFICYSYRDENGNLKVPESLAMNKDVSNRKEVL
ELKAYRTKNRQFIQREDCSDILDWIRRTQREQSLSVC*

>g15272.t1
MASEEPKTREQRWSLKGQTALVSGGTRGIGYAIVEELAGFGARVYTCSRNQTELNERLKE
WEAKGYQVSGSVCDLSSRTQREELMKTVSSEFDGKLNILINNAATVIIKRAENSTPEDQS
FLMGTNVESPFHLCQLAYPLLKASEIGSIIFISSVAGGMALPGVSVYAATKGAINQLTKN
LACEWAKDNIRVNTVAPWAVRTTIMKQDEIDPSLAGMYPPLLSRTPLRQIAEANEISPLV
AFLCLPAASYITGQVIYVDGGYTAGTF*

>g24539.t1
MDKAYFLFLVVLHFVTTGLALSVANNNTSDLNALLAFRAAIHDPHNILPINWSTSTSVCN
WIGITCNTRHQRVAAIDLPNMDLVGTIPPKLGNLSFLVQFNIINNSFHGKLPKELAQLRR
LKYIDLEGNGFVGELPSWLAALTGLQYLSFHHNNFSGSLSGGIFNSTKLETIKLAYNSLT
GNLPQEFTALPKLQWMSISYNQLSGPLPRALFNLSSLQHFGFMDNSLSGYLPAYICDHLP
QLQKIYLSDNYFEGEIPSGIGECSSLQILDLSYNNFTGDIPKGIWNLTTLTRIYFTHNRV
TGEIPPNISNLQNLEILSIERADLTGVLPQEICKLHKLVGINLGLNKLTGVIPSQIFNIS
TLRLIDLVDNNLSGNVPSTLGIMLPNLEVLYLGGNKLSGAILTSISNASRLNQLSLPGNR
FSGAIPHGIGNLRLLEYLSFEENNFSYESPNGELSFFSSLTNCKYLKGLLIDNNPLNGFL
PKSIGNLSIFLETFDLSSSGIKDEIPSSIGNLSNLVTLSLAENGLKGIIPSTIGELSKLQ
RINLEGNKIEGPIPRDLCYLLNLGELRLGSNKLSGMVPNCFENITSLRYIYLDTNNLTSN
IPSGLWNLHYMLMLDLSMNALTGFLPPEIGNLKVLIIMNLSRNQFFGEIPSAVGELQSLQ
ELSLAHNKLQGVIPESMKNILGLQCLDISFNSLVGVIPNSLEALTDLKYFNVSNNKLRGQ
IPKGGPFKNFTKLSFLSNEALCGAPWFQPCQTSENKSRAKRLVFIILFGMGFVALIISLL
LMRKLRRNVMAPAHDLLTIITCERVSFHELSQITNGFNKSSLLGRGMFGSVYKGMHENGM
SWAVKVFDLQLEDAFKSFDRECETLHCLRHRNLAKVITAYSNPNFKALVLEYMPNGSLEK
*

>g40639.t1
MGVDYYRILGVEKKASEDDLKKAYRKLAMKWHPDKNRTNKKDAEAKFKQISEAYDVLSDP
QKRAVYDQYGEEGLKGGVPPPGSAGGPRGPNYFSTSGGPTSFWFNHRSADDIFREFFGFG
PFGGMGGGGGMRGSKFGGMFDDSMPGASMHQQTYRKGPPIEQNVPCTLEELYKGTEKKMK
ISRDVFDSNSGKIVSVEEFVTINVRPGWKKGTKITFQDKGNDLPGEAPADLVFIIDEKPH
RVFTRERNDLVVTQKISLAEALTGYTVRLITLDGRNLTIPINTVIYPTYEEVVRGEGMPL
QKDPPKKGNLRIKFDIKFPARLTPSQKAGIKELLGSSSS*

>g76310.t1
MNPTKGLLPTNNENKFNFDVQASEVPSAQLKLQFKDILFNPKYIIGADQFLKNSNNSVSL
SVSGTDSSTMTLHYEDYKGHHAVFSEEGIQSLRHIAEILSSRNDLEDCVRMYIEHRKDVV
NMVHMRLQKKSNLGTICASTCWDESSEQIQRWTQVAKICIGTIFGIEKCFYEQIFGDLGT
VEDAADGFVYIVSEAAAELFEFPDSLLSSQRLPQRPDILLPLYQELTNLFPIVIVLFDQD
LRPATAICNQATGILFRLKQYMTKILSATERHVLRELSMIPTPGGAIHPLTQYVIHYIDL
ISVHGQSLIDSVAIPQGSNDLNPTEMGSLEINKGLISLKDHLTRVIEFLLYNLKYKSNFY
EQESLSHLFMMNNINSVAEKIKSSQALEELIGDHFLMKLREKVELARTDYLTSTWGVVSH
FLSDEGSKSHLKCNFLPVMARRAVKKKFRTFNRMLEDIRHTQADWTVPDQQQREKLLECI
LSKLIPAYKHFLAQFSSQIEKVKHPNRYIIYSVKDLETKVLNMFQCTEDLDIHPSV*

>g22228.t1
MAQEQEILLLDKHKEKHFTAGEVVRDIIIGVSDGLTVPFALAAGLSGANASSSIILTAGI
AEVAAGAISMGLGGYLAAKSDADHYMRELKREQEEILAVPDTEAAEVAEILSQYGIEPHE
YKPVVNALRKNPQAWLDFMMKFELGLEKPDPKRALQSAFTIAIAYIIGGLVPLIPYMFIP
VATKAVVASVVLTLVALLVFGFAKGYFTGQKPIKSALQTALIGAIASAAAFGMAKAVQG*

>g15939.t1
MGAIGGEELMKWEKMQGVENGGEEKILVLVRLRPLNDKEVLRNEVSDWECINETTILYRN
SLQERSGLPTAYSFDRVFRGNCPTRKVYEDGAKEIALSVVSGINSTIFAYGQTSSGKTYT
MSGITEYTVADIYDYIQKHEERAFVLKFAAMEIYNEVVRDLLSTDNTPLRLLDDPERGTI
IERLTEENLRDWSHLKELLSICEAQRQIGETSLNETSSRSHQILRLTIESSAREFIGKDN
STTLAASVNFVDLAGSERASQALSAGQRLKEGCHINRSLLTLGTVIRKLSKGRHGHINYR
DSKLTRILQPSLGGNARTAIICTLSPARSHVEQSRNTLLFACCAKEVSTNAQVNVVMSDK
ALVKHLQREVARLESELRTPASINDYTALLRKKDLQIEKLEKEVRELTKQLNLAQSRIAD
LKQIVGNNQASGQWDMEEKKTREDECLVLESSGESDPGIKKLRPTQSCKRDKGGEEVFCG
QISELGFDCSPSDGATIGEDSEEFCKEVRCIEAEKCNVDKSSVLLDNTENDERIPRQASG
IESGFTYGASEQEFQQVQKTIDCIITPCNGKHSLWDSPATASGSRSLKLTRSRSCRANLM
AGSSSPDYGKVKNVEATPPDGLEKNFPGRPEGLCRKHWKIPPFTISANAPNLSRNNSQSS
NSSAFVDELRSQNNNPRDEDIPSVNTFVAGLKEMAKHQHKNKMDYQGQGIDHTAESPGKI
LKDRGLDPLLEPSGDPSLWPLEFERLRVLIIQHWQTCNVSLVHRTYFFLLFRGEPMDSIY
MELELRRLFYLKETFSEGNTVVQDGQTITSASSLKALLRERRMLSRLINKRLTTDEREKS
YHKWGINLNSKQRKLQLVQQLWSKTEDLDHVEESAAFIAKLIRFSQQGQAIKEMFGLSFT
PPRLNRRSFIWKNSKATLL*

>g44887.t1
MAKGSGLSFDPDRIGLFLHKPTVINSSLIQEDKNNHHNNYHHLLYYHHHHKLKQEAVFQE
MESASTVVNDNKRSSPPNTIQFPVNLNCSTHDQDDGPLPPNSDHHEEMDFFADKKLNNDE
SKAATVTDADADTKDLSGPTELGFNVNIGLHLLTANTSSDQSIVDDGISPQSDDKRAKSE
LAVLQAELERLNGENRGLREVLTQVTNNYNNLQMHLMTLMQQKKEDHPRAHKSGEEHDGK
VLEDMNKHHENGHGLMVPRQFMDLGLAAATAETDMASLSSSEGRSGQERSRSPVNNVEAS
TGGSNIGREDSPEKGSQGWGPNKVPRLNHSTPKNVDQATEATMRKARVSVRARSEAPMIT
DGCQWRKYGQKMAKGNPCPRAYYRCTMAAGCPVRKQVQRCAEDRTILITTYEGNHNHPLP
PAAMAMASTTSSAARMLLSGSMSSADGLMNSNFLARTLLPCSSSMATISASAPFPTVTLD
LTQSPNPLQFQRSPTQFQFPFPNATQGNPAALLPQIFGQALYNQSKFSGLQMSQGSEAAQ
LGHQVPQLPQLHQGQQNALADTVTALTADPNFTAALAAAITSLIGNPQSTSAANNNNPNT
TATTSNNNGSVTTSNNNSNGNNKVLNSSFPGI*

>g56227.t1
MGLARSYTSNAGTRYANQKNIGGLGIRKMIDVNRAFLAKLAWQLCSESNKVWISMFKAKY
LRQGNMMDGVGVHSNSSWIWKGIKEGRKLLLEGACYQVSNGHNIRTWLDPWIPTVADFKP
IPRIPDCHGVNLVKDLIDQNVRCWKIDVLHRVFHPSIIPEILKIHIPLREEQEDKLLWIP
SKSGKFTTKSAYFLSRNSSLSNNTQVSNKTWKRIWHSKLHQRHKHLLWRIISGLLPTKTR
LNQWMNIEEICCPLCNMEVETEEHLFLRCPLVKCIFFKSKWTLRLDNFSDWSISKWIEEI
INNDHMPFGNQSLNEEFMVFSVVTLDSIWRWRNKVEFEKKEVDQEEIWRQINSAVVIHWE
VFSRKPRKAQMQDFLQEWITPPNSWLKINFDTACHDGRSCTAVVIRNSRGEFLFAWTQIN
ENTDPLFGETLAALNAMVLAHQLQIDKAIFEGDAVNSLLSITGKLEPDWNIKTLVYDAQS
LLYRYPNWHFVKISRICNFAAHNLGQWAISCNHNGLVPISSMPPTVFCDARSTKVVDVPF
VLDNEV*

>g5484.t1
MERIPSKRPRPVWHPPWKNYRVISGHLGWVRSVAVDPTNTRFYTGSADRTIKIWDLASGT
LEHTLTGHVEQIRGLAVSSKHKCMFSAGDDKQVKCWDLEQRKVIRSYFGHLSGVYCLALH
PAFDILVTGGRDCVCRVWDIRSKVQIHKLSGHEDTVCSVITRPTDPQIVTGSHDSTIKFW
DLRCVKTMDTLTRHKKSVRAMALHPKEESFASASADNIKKFNLPGGEFLHDMLPQQKTII
NAMAVNEESVLATAGDNGSLWFWDWRSGHNFQQAQTFVQPGTLESEAGIYALTYDVTGSK
LITCEADKTIKMWEKDESATPETQPLHFKPPRDIRRF*

>g26540.t1
MGMLAWGDMGIVAACKSIGEAMKYETNGYQWLAPEIIAGDPESVAETSMSNVYSFGMVIW
EMVTGEIAYSAYSPVQAAVGIAACGLRPDIPKDCSQILRTLMMKCWNNCPTKHPQFSEIL
STLTCPINDCHDIAR*

>g36146.t1
MDMYDPVHQVSMWEDALRSHMSSNTDVCIIPKADDARLNGKSEYASQEPLLPPIDSREER
SISDKVLRRLAQNRVAARKSRQRKKAYVQQLETSRLKLAQLELEIDRARQQGGCIGGAAA
NVGFTGTVNPGIAAFEMEYGHWVEEQQRKTSQLRNLLQSQISDMDLQKVVENCLNHYHDL
FRMKADAAKADVFYLVSGVWRTSVEHFFLWIGGFRPSELVNILMPTLEPLTDQQLADVCN
LHQSCQQAEDALTQGIDKLRQNLGQSIGGFAADPTGLGNYGFQITSAMEKLEALETFVNQ
DDLWLSSSFRAILYKCEAVSFLFLMADHLRQQTLQRMSSILTTRQAARALLAFGEYFQRL
RALSSLCGCSTS*

>g17708.t1
MALSEIKALFLVLSLALLSFGVECSLFRARHFHKDGGETVFDVTKYGAKRDGKTECSTAV
IKAWNATCKSSAPAKLLFPKGKFLTGEIFFQGPCNTPRPIIIEIQGTILSSTDLSLFTKS
IWICIENVDGIIVTGEGTLDGQGDSIWQHPNAGLLPVSLQMEKVQNGVIQNIKLVNSKGF
HAKISSCTNVTVTGLNIRAPATSPNTDGLHIGGSQNVNVTNLAIGTGDDCISIGDGSTNI
EISNITCGPGHGISIGSLGKSPGEKDVKGVTIKNCTLIGTTNGARIKTFQASPPLLASGI
LYEDIIMHRVKNPIIIDQHYNSNSEPTCVQITDVHFKNIRGTTGTQVAVNLDCNDVNPCK
GIELADIDLTPVRGIPPLSSTCSNVKPIISGVFTPDKGSCR*

>g31186.t1
MKTPLLFILSFLVFSIYKNSFTSAAEAPEPVLDVAGKQLRTDLYYYILPANVRGKFGGGL
TLSSIGNDTCPVSVFQEMSELKNGIPVTFSPVNTKNGVIRVSTDLNIQFSYPETCGEAPV
WRVDNFIDPTADSSVSIGGTVGNPGAGTISSWFKIENFGYDYKLVYCPTVCSYCDVICKD
VGILYQNGERRLYLIDYPLRVVFKQA*

>g17776.t1
MAQVLTCLPLRCINLNGNLFKDNRRGALHHVDGAGKTRPKRHTIASSQAYHRSEQTNRRS
ANFQPSSWTHFLFGSINEKDNAWENQTEFVKKLEDEVSCMLDSDDLEPLPLLELIDDIDQ
LGLSYRYTSRIKIAIEKLRHLEEATGKVTKDLHSSALYFRLLRQHGYEVSPDVFEKFRNQ
NGNFNEKLGRDVRGVLSLYEASHLAYEGENILNEAKTFTSLHLKDSKKYVDSNTSEEISH
ALELPYHHRMRRLEARWKIELYAKRKEKNQALLELARLDFNNVQSTLRSEVQEVSRWWKA
VGLADKLDFARDRLMESFFWSVGTVPDPQFSKCRLAVTKAFALITVLDDIYDVYGSLDEL
EQLTEAVVRWDLTAIKDLPNYMKIFYLALYNTINELAYDTLKEQGEIIIPHLKNAWADLC
KAFLQEAQWNYKKVTPTFDEYIENGWISSSLAVLLVQSYFLVTENISKEAIHCLDNHHDI
LRWSSTIFRLSNDFRSSKAEIERGETTNAITCCMHESGLSEEFAWQHISKMIEECWMKMN
KQLISPSPFEEVFVNTVINLARITVCLYQYGDGFSAPDVIVRNRILSVIMDPIQLMETEN
IDMKMKI*

>g7218.t1
MALNLSNWSLRGNIAPHLGNLTFLASLDFSYNNFSGLIPSELANLRSLERMNLGYNNLSG
DIPTWLGTLPEVQLLFLNNNSFTGVIPLSLCNLSKLEALNMGYNFLEGRIPRGFGNLSNL
WTLTLGHNQLSGSIPPAIFNMSLLQEIDLSENSLSGSLPTVMCNNHLSKLKTLDLFFNNL
QGAIPSQLFKCRNLENLSLSYNQFDGGIPRTLGYLTKLKDLSIGRNIFSGGIPLEIGNLT
HLERLDIRDSNLTGQIPSSIFNISSLRVINLSNNSLSGSLPVDMFYDLPMLKELLLFTNK
LNGSIPAYIWECKTLVTLALQENNFIGGISKRVGNLTSLQILYLSDNSLTGELPIEIGKI
VNLETLALENNSLSGHIQPEILNMSSLLNLGLDDNHFSGPLPLNMWNTLPNIQYLYASNN
EFTGVIPSSISNASNLLLLSLLYNSFSGPIPSTLGNLRFLHRLFLGGNNFTRESSTAELR
FITSLTKCRDLEVMEISENQFNGFLPPSVGNFSASLETFNAFGSKITGTIPSEIGNLSSL
QSINLDSNEFTGLIPSAIGKLARLDRIYLEHNRLQGHIPPELCQLKILGDLYLNENMLNG
SIPDCLGELKFLRRVFLQSNNLTSTIPSSFWNLNDLLGLNLSSNSLSGDIPPDIQNLKVI
IELDLSLNQLSGDILSSLGGSLSLVHLSIAHNNFQGNIPESFGNLISLNYLDLSHNNLSG
MIPKSLEKLGDVEYFDVSFNRLEGEIPTGGPFANFGAQSFVQNYALCGLARFHLPPCKTK
AHSESKSRKSLKYILPPIITAILISATGIFLWANRTRSVESPQNELSLLREWRRVSYREL
LKATDNFSENNLLGTGSFGSVFRGTLLDGSNIAVKVFHLQSEGTMKSFEAECEILASRVG
ATGLRLLQSLESGGWLWCLM*

>g31122.t1
MSTASQTMLNQSVFEEQDVSSQLGFFSFPSNFSTSPFGCSQPLKSVAALPASLALDAQTT
LSESPTLKHKEDIITSHFGESQLLSLQRSGANLWTWGNVNDCMSSKRNGGENYLGVTAIK
MKKIKARRKVREPRFCFKTLSEVDVLDDGYKWRKYGQKVVKNTQHPRSYYRCTQDNCRVK
KRVERLAEDPRMVITTYEGRHIHSPSHDEDDSQASSQMNNFFW*

>g7904.t1
MNDKVDKLVIFLAKRDGIDKLVKTFQYVSKLVHWHVEATHPEIAQRAKQWEVASGLSRKA
FRSGRFLTGFNALRRNPGSTPTLKFLAILANAGEMVYFFFDHFLWLSRIGVLDAKLTMRM
SFVSAFGESFGYIFFIVSDFILITEGIKAERKLVRTTTTSAEESSKDAKDNIKKIRGDRV
MRLMAVAANVADLIIALADIEPNPFCNHAVSLGISGLVSAWAGWYRNWPS*

>g25559.t1.2.5bbdf93a
MVQLFLSDYNWSTGGNGELFDKRKSLLSELESVLWSLMTSGGRSEVRLWLCNSIAGISSI
SPRHQREVFVSLVTTHASKRRLAAQLLQLLFEKEPQKAGRIIAKKSFMLETFFRGNPRRI
LQWFSNFGGASGFEHKKGAKALSRYAFVYRDVCWEELEWKGKHGQSPAMVATKPHYFLDL
DVQRTVENFLEYVPEFWSSSDFAESLKDGEILSIDKTYFVDMFLNLMYKEDMKELWDVID
EFLIEESFSSLCHHLLIILEEQELLYFLNLISKFLKPRFDVAEYSNPSLCFEVILSKCSV
TSIDQLLLLNAVTSQARQLLRLVREEGDMDVKEKVKNIVYQVCSSFSHADSLAPIMEEWS
KKKSLESIKWLGLQSWATFFKLSEEFQTSESWESLFSSNGIEFRRSDKYRLLDHDEYSDD
NGSEWDDRPSGKVKHKRKGRHITKRRRKKLISEESYGDGLLDLDMVGNSLNLQFKACDWL
LSTDQYSTTWSSVDLPEHISKHCFFVWIKFVFIKFWRP*

>g25054.t1
MRVVKVIRMTLVLLGIALFVEGDQQHQWRKRKSIFNKGATSSVLFPLDGNVYPDGYYFAQ
VKLGQPPKPYFLDVDTGSDLTWLQCDAPCNRCTKGPHPLYRPTNDLVACKDPLCASLHSG
DYECDNPKQCDYEVEYADGGSSLGVLVRDVFSLKFASGFQRTSRLAFGCGYDQLPGKSTP
PYLDGVLGLGRAKVGIVAQLHNQGLVQNVIGHCLGGKGGGFLFFGNDLYDTSQVNWTPMS
RDSAKHYSASSAELTFGGKGLGFKNLDVVFDSGSSYSYLSSRTYQALLSLVEKELKGKPL
KEAKDDRTLPVCWSGRKKFKSIHDVRKYFKPIGLSFRNGWRSKTQFDIPPDAYLIISSKY
NACLGILNGTEAGLQNLNIIGDISMQDKMMIYDNENRAIGWSSANCSSPPKSSTLVM*

>g42238.t1
MSDDELAGELRKHLMQKRYLIVLDDVYDPEVLDDLRRIFPDNDSGSRIMLTSRMDDFADR
ADSSRLTYSMLRLSQGESWQLFKKNLFDGETLDSSFECVGKEIMKQCSRIPLTVILIAGF
LSHTERELSCWMEVSKSLRLEIEECPLGLLGGVLTFVYKRLPDHLKPCFLCFGKFSEDKE
IHARKLFDLWIEKGLIQETDSKTLEDVAEERLLNLTSRNLVRVSRRRYDGSVRACHLHDV
VREFCIWMQNKCTFFT*

>g47463.t1.1.5bbdf93e
MAGKVAASLPMSTFDFELVGDDADQHTTVASSNQISPWIDPSKIKLRHRIGRGPFGDVWL
ATRHQATEDYEEYHEVAVKILHPIKEDSISVVLSRLDDLFSKCQELECICRMQGVSMISG
KLCVVMKFYEGSIGDKMAHLKGGKLSVHDVLRYGTDLAQGIMELHSKEILVLNLKPFNFL
LNEDDPVTLGDIGIPYILLGIPLPSLEMNRRVGTPNYMAPEQWQPEVQGPISFETDSWGF
ACSIVEMLTGVQPWSGKSVDEIYKSVVRRQEKPLIPGGLPPAVENVISGCFEYDFRSRPL
MEDILYAFKSSQSAVFRDISWIDPGSRKLAEKSTYNGYSEWFLLKDRLQVGDMVRSRKPP
NSCKPENMEVPEGTIVGLDHNSDRDEYVLVRMHGIHDPVRVNGATLERVTFGLAAGDWVR
LKAEGKKHSPVGILHQVNRDGSVAVGFIGMETLWRGSYSELQMAEAYCVGQFVTLKSDAF
GPRFEWPRKRGGEWATGRICQVLPNGCLVVRFPGRLTFGNENSSFLADPAEVKLVSFNTS
PGMVKKYQHLEDFHWAIRPILIALGLFTAMKMGLFVGKRIGRSKIRKGRNHVAPADCQPL
EGQTAGNAAWLPPQVANIIFREGVTTTTSW*

>g59558.t1
MCIVSRFANVKTLEQFLWILVVFIDVGNIGKIDEKAIKEVFLKVLDNYIKWCRYLRIRLV
YNSLEAITRDRKLFLVSLYFCIWGEAANVRFLPECICYIFHHMARELDAILDHGEAHPAP
SCIGENGSVSYLEQVICPIYKTLAAEADRINKGKASHSEWRNYDDFNEYFWSPACFELSW
PFKKDSAFLLTPGKGKRTGKSTFVEHRTFLHLYQSFHRLWIFLAIMFQILTVIAFNGGKI
NLNTFKTVLSAGPTFAIMNFVESFLDVLFMFGAYTTARGMAISRLFIRFFWWGLSSVFVT
YMYIKVLQERNEDANSIYFRIYVLVLGVYAGLRLILALFLKIPACHTFSEMADQSFFQFF
KWIYQERYFVGRGLVEKSTDYIRYVVFWLVIFVCKFTFAYFLQIKPLVQPTKIIVNIPSL
QYSWHDLVSKSNNNALTVASLWAPVVAIYLMDIHIWYNLLSAIVGAVMGARARLGEIRSI
EMVHRRFESFPEAFVKNLVSSLIKRMPFDQQSSQASQDHNKEYAAIFSPFWNEIIKSLRE
EDYISNREMDLLSMPSNTGIIRLVQWPLFLLSSKVLSVILPDFLDY*

>g36492.t1
MQVLHKLNQKSLKLTPIFCKTTCYFSTQYSIADPPSSASYDYLINKAGRDRDFGTVQHLL
MKRFRDGCFNTNNTFKFISTDLSVLDDLLKALAGLSHGFPKKSAHDCLVKQLSKLCKITE
ALRVAEIMVRNNYGANACTFHPIINELTKKKDVGEACRVMQVMRQCGIKPDLTAYNYLLT
AHCFGRDLISAAYMLTKMEEDEVGADTRTYDALVLGACRAGKIDGALMVLRRMVDDGVSA
LYSTHTHVINAMLRNGYYGQAVEFVMIYAGKDRGLDFENFGILASRLIRLERLDEAKLVV
KEMRRRGINMGDKLKDFYLIHVAS*

>g2652.t1
MSSSSSYKKYETRKRDPDPKTSVLLVIDMQNYFYSMAEPMLPALNTTIELCRDASIPIIF
TRHNHKSPQDYGMLYEWWDGDLIMDGTPEAELIPSLDRREDDLVVEKNTYSAFRGTNLEQ
KLKQMDVKEVMVTGVMTNLCCETSAREAFVRGFRVFFSTDATATSSIDLHDATLKNLAYG
FAYLFDCKRLRDAFSKSLTDRGREDGTEQSNKRVM*

>g8930.t1
MLGGGTLCLGFTYFKSPHLPYVRYSYSSRICHKRGLVKAGETSPKRPLSPSPFYISSLQI
LAKAAVAAAASAAIFSVAAEAGADLLTVDSPQQKESESETLSNIPQTLSGECISGKDDCK
KPRIQRPKSRKAETCTVKCVNTCIRGGLGSPGEGPLNVRRPLVVFKQGFRSRQYCLVECS
DICNLIGDGDDGP*

>g29184.t1
MASVQHDYHLNDGNEIFRPIADFPESIWIDRFKPFTLDKQVYYMYVEEIEILKEEVRSRL
LARENKTEEKLSLIDTLEQLGISYHFEEEIEHLLDDIFNQNQDLKYHPQCDLYTAALQFR
LFRQHGFNISCGIFCQFTDSSNKFKESLSNDIKGLLSLYEATHVRTPQDKILEEALTFTT
THLKCGAESMPSSLARQVNHALEQALHKGIPRIETRQYISIYEEDESKNDLLLRLAKLDY
HLLQKLHREELNEILRWGKDVEIVSKVSYSRNRIVECYFWGLGVFFEPQYSFSRIIFAKT
CVLLTIVDDTYDAYGTIDKLKAFTVALERWDVQEINQFPDYMKTSYVALLDFCGWLEQEL
TTRGRSFAFSKYKEVRMP*

>g63381.t1
MDQSFDIMENIFSRLPIKSILACKCVCRYWYSTISNLISCSKFLYLQAHQTLKNPKLWSL
SILITSPAAAIDYRACLGNKDDIKKAWKNRHSPEIFGKDFTLMGSYNGLICLHDKLFNVF
LWNPCTGSFATVKKNYRNKERNPFLFYGFGANLSTGGYVVVLGGPFFDCDQNIKPGYKAI
GICVMNNELGRYVWKFIQYIRPYHVFEKIGVRMNEYLHWPASFDSRGKVISYNLNEEKFQ
EFEVPAKINWQRKSPFTVGNFRGYLSTIFKVGGIFEIWIMKKYGVKESWMWLVNIEGFGL
HDILVPLGFLWNYDIILQGDRYFIARYSFRDKTVQILKLHGGNKCSAVSFMDSLVAPNN*

>g63776.t1
MYAETGMMFPYFQGFPQEVQQLQDFTFSQKPNGLAGNLIQASSISEYDLGGEGDLFKAPE
PIIEEPMIGLDPMAAAMSMISCGGDVIAPQDLKVSDIELSIDNGQLLSEVFYECKKDILA
KEATEATFSEVLDVKVPQKNLIAAGDVFSQGSFQKSVSSGCLSSMEWIHGAPMRPDFLDC
PGVDLRAVYGMRRAFSEGDIKTLGNGNINIIPSPAGQPQIITSCTSEDRKEKLSRYRNKR
TKRNFGRKIKYACRKALADSQPRIRGRFAKTEETDAFRKQ*

>g40423.t1
MAGRNHPYSRPPHGQPPALIDDPRRLQHQPPQGPNRFHPEAVIEAQRREIQALLLNNQRL
AATHVALKQELSASDQELRHLSSTAAKVKAETDARVGEVYERSLRTEAELLLVNEISAEL
SQVKSDIQKMTADREEFTSKLREINQELVLARSELEQLPNVQEEVQAMRQEVMRGRAAIE
YEKKMQANNLGQSQVMEKKMISMAREIEKLQAELADAEKRAMAAAAAPTPSPGYPLVYAN
PEAVYGNLYSDCYPVQQVQAGINANPSYGPGGVLHVPSAPYDVQQPNVHI*

>g61855.t1
MEEKEQEKQVTGLMLESNSMVSATLGRVMHMLLNSRPNKLQHCISNLHSPPKLAPLSVSL
EQSLWFLHKYVGEAAEKEETLDEVLVPMIEHSLKFMESRHGNQTMVLLNWFFQDEVLFLA
LARNLAEIISRKDDHYIALGWCFLARDLVEYESSMNKLMTNGIRKRYTALLKILCSCTRH
LLTLISSGSTLQGGFELPTRLAVASADFILSLTVALTRKDLVSDFSYDKEKLHNSNSQDR
PVSLLDFDSSEKKVKATRKASVFLKDMGAKLLLWDHMDDLIVLVWRLKAWSRKSRSLHSK
GLERVYKWLQATQTQYVCYQNEICKC*

>g70934.t1.2.5bbdf936
MMSETFMIDNSELHSLYMNDRIPAEIAENLKEIFPEHGDLSFEEVLLQQESAYHYIQANG
KKNDESDNNGQTNNWNQSSVQEGESSHGAGVESQLDLDEALARTLQELGEEFDDLYISEH
SGTVAERGTPTPREMPVRVTNHTIRQDDIDPDNMTYEELQSLGEAVGHESKGLSEDLISR
LPTFKYKTGFFSKKRKEEIALSVKRRSEKTDLHKPTEKRMASAYVASIYFSF*

>g49559.t1
MDSYLTTDKHLLAQVWAVAFVAKIRLSPKSSKRPLMAQILLALQHVKSAPFTTYQNLKPI
GHLGSVSPALVIAKILEGSEIVGTTPQAATNRSTSDSNTPSRNHGMSESSGTEEAYPNGE
IFTRPILRVFYYSELVNATRNFGSDSIVRKDVFGTVYQAWLQDWSTSKSDGSDVPPLSWE
VRLKILLGAARGLAFLHAAERQGFYEYFDASDILLDTVS*

>g41066.t1
MYRHAPRLLSRATTAAMRWRRPFSTDVPAEAPFDSKFVETWRSTIPNIEPPKTPSAFMTP
RPPTPSTIPSKLTVNVVLPYNSIFSGKEVDMVIVPATTGQMGVLPGHVATIAELKPGVLS
VHEGNDVTKYFVSGGFAFVHANSVADIVVIEAVPVDQFDQSLVQKGLAEFTQKLSSASTD
VEKAEAQIGVDVHSAINAALTG*

>g49730.t1
MDFLNIPGLNAIDLIMNLWSSGFDVMNLVHKFLNNFVARLSLHALFSFLPPYLVFKFLDY
IRRSIFSEDLTGKVVLITGASSGIGEHVAYEYARRGACLVLAARRVNSLREVAEIANILG
SPYAIPVATDVSKVDDCKRLIETTIEHFGQLDHLVNCAGITPLGLFEDLIDVDNFAPAMA
SKAAVVSFFETLRVELGSEVGVTIVTPGAIESEMTKGKFLMPNGKVKVDQEMRDVQTSVI
PIRSVFKCAEAIVDSARRGDRYLTEPSWMKATFLYRVFCPEVLELLNRWFLFPPPGRPAT
EAPSKILLDLTGLKKYLYPPSVLSPEIKTD*

>g66480.t1.2.5bbdf93d
MVKLTMIARVTDGLPLVEGLDDGRDMPDVDYYKKQAKALFTNLSRGQNEASRMSVETGPY
VFHYIIEGRVCYLTMCDRAYPKKLAFQYLEDLKNEFERVNGSQIETAARPYAFIKFDTFI
QKTKKLYQDTRTQRNIAKLNDELYEVHQIMTRNVQEVLGVGEKLDQVSQLSSRLTSESRI
YADKARDLNRQALIRKWAPVAVVIGIVVLLFWVRKKIW*

>g68484.t1
MGSNMSKKPGETSAAINNIQFTAGLDSYEVACKMDEDLQSFDTSLHARTNHLITTLAAGV
EVRALSFDSLKEVTGCLLEMNQEVVKVILECKKDIWKNQELFELVEEYFENSLKTLDFCA
ALEKCLKRARDSQLLIMVALQQFEEEDGVEGNRYTRTLDELKNFKAAGDPFTEEFFENFQ
SVYRQQMLMLEKLQMRKNKLDKKIKYIHAWRKVSSIIFVATFAAVLICSVVAAAMAAPPV
AAALAAATSIPLGSMGKWIDSLLQNYENAIKGQKEILSSMHVGAYVTIKDLDNIRVLIDR
LEIEIESLLVNVDFAINEDAVKLGIEEIKKKLDVFMKNVEDLGVQADVCSRDIRRARTVV
LQRIIKNPNH*

>g24445.t1
MLVDDLCNTSYFNIKYVLMAEAISGKTQKRCAVVTGSNKGIGLEICRQLASRGITVVLTA
RDEKRGLDALHKLKESGGISDNLLFHQLDVANSSSVASLAEFIRSHFGRLDILVPLRYFS
S*

>g59921.t2
MDDYYFDGKRGHVPAFGSWDCNDDLPFTQCFETARQAAGLLRYSYSEDRDLYVAGDLYEN
DVVTPAMIVVPRRKQVKSSYPQGKEAKGGEAWVVCDCDCGVNVKQPPSPLPTFSPRRAPK
AVDEDLYKISPELLRAKPRKKRGCGFFSICLHPSRVL*

>g8750.t2
MEETCGVKLLGFWVSPFVERVKWALKLKGIEYEYIEKDIYNKDSLLLKSNPVYGKVPVLI
HNGKPVLESMIILEYIDEVWKDTPLLPQDPYERAQARFWAKFAEEKVFAIHFLLLDL*

>g21307.t1
MERPSHTSSSLTSSCCLWSVTLFYSLFLLFCNSGEARVKLPANETVPAVFAFGDSIVDQG
NNNNISTLIKCNFPPYGKDFSGGYPTGRFSNAKTPPDIIGEDPA*

>g966.t1
MSQKTSRHQRKPSQGVFLFPDNLSDPLPKNDAEETKAAAPPASSSTACVAHPPPMVEKGG
APAPAPPAAKSEEMPTDNPPKSKASNVSSTE*

>g3201.t1.1.5bbdf941
MKTLAHQSKIDVSCWDGTLSRDEFHIAASAFAEQWNKFNSALPQCSWVARPNPPYLPPAY
QAEGYLSVEDVIMFRTAEESCSGGDDEDGKEELSCSDECGFMDSATLAQKHDHSSHHYDF
HVIYSASYRVPVLYFRAYSRDGQVLVLDDIEKSIPAKSAKLLTESKWTFITQEVRFLILD
I*

>g1694.t1
MVLVTVRVNSVGCNWLAVERVAYVSTSWGRGSCFCRLWVRGTADGRGGLLFLLMGDEALC
GFLFFAVCGHGGGGLWCFLIRRWMRLGGRIVTEGASRSWCCRGDVIVGVAIMGFIGWLFG
LQLGSSS*

>g65028.t1
MALYISPFSSSSSPLLSFPARRCCFINIRRSLGVRSAVTVDSPASSTTDSSGSPQLLLEV
KDLSAVISESKQPILKGVNLTVHEGEVHAVMGKNGSGKSTFAKVLVGHPDYEITGGSVTY
KGENLLEMEPEERAVAGLFMSFQSPVEIPGVSNIDFLNMAYNARRRKLGLPELGPIEFYG
YIAPKLELVNMKVDFLNRNVNEGFSGGERKRNEILQLAVLGAELAILDEIDSGLDVDALR
DVAKAVNGLLTPKNSVLMITHYLRLLEFIEPTLIHIMEDGKIVKTGDISIAKVLEKEGYK
AIAGS*

>g1152.t1.1.5bbdf93a
MARKNIPAKKEAAERKKPDGGEKRLRGADRSAYFARREAAKVLRTVLLGDSRRRAVGSIK
SLVYSPSVRNKKATYALVCETLKHLPVIKDVLRAAKVMNSKWKRQEELICIVTYDILFGQ
EASLIGDAEKFLLSRKDELQSALVRLLAAKRVKHIKDLMPLHKTADVSKPRFVRVNTLKM
DVESALYELGQQYVVHKDDMVPGLLKLPPGTDLHKHPLVLSGSIFMQARASSMVAIALGP
KPGWWVLDACSAPGNKTVHLAALLKDKGKIIACELDEQRVKRLEATVRLAGATNVKVKHE
DFLNLNPEDPCYSKIRAILLDPSCSGSGTAIDRLDHLLPSYTAGLDDAANSDRLMKLAAF
QKKALEHAFSFPAVERIVYSTCSIHQIENEDVIKSVLPLAASYGFQLATANPQWPRRGLP
VLEGSQHLLRTDLVEDGEGFFIALFVRKANHNHEKCVETAGETSGGGLRSKRFSSRKRGS
VSYFFNNSFRMLLYPRFCVQKQRY*

>g34201.t1
MWIETIALAMFRRWSHSHHEQDSDEKQQKVSELKAALGPLSGRALQYCSDACLRRYLEAR
SWSVDKAKKMLEETLRWRSTYKPEEIRWHEVAVEGETGKVFRANFHDRHGRTVLILRPGK
QNTTSMDNQIRHLVYLIENAILNLPEGQEQMAWLIDFTGWSITNNVPIKSARDTVNVLQN
HYPERLAVAFLYSPPRIFEAFWKVVKYFLDPKTFQKVKFVYPKNKDSVELMRSYFDVDNL
PTEFGGKATLQYDHEEFSRQMAQDDVKTAKIWGFDKHPNGYLGAEVVPEPESLASPAS*

>g60071.t1
MAVLGEIITGGAGGFATGGSRPLLLFSHGLLFCLKLVNWRLEPLGMVVDRIDAVVRWRGE
ELVEMASGSLSSKLLVIERLMVKRFGVIVSVDFGVFGGWGQGSGVDGGGFRW*

>g36903.t1
MADIVKQILAKPIQLADQVTKAADEANSFKQDCSELKAKTEKLAALLRQAARASNDLYER
PTKRIIVETEQALDRALGLVVKCRGNGLVKRVFTIIPTANFRKMSSQLENSIGDVSWLLR
VSAPAEDRGDEYLGLPPIAANEPILGLIWEQIAILYTGSLDDRSDAAASLVSLARDNDRY
GKLIIEEGGIGPLLKLVKEGKLEGQENAARAIGLLGRDPESVKFMVHAGVCSVFAKILKE
GSMKVQAVVAWAVSELAAHYPDCQDLFLQNNIIRLLVSHLAFETVQEHSKYAIVSKATSI
HQVVLATNGNNSNVANNVANSNVVEEDEKNRHPLMGNRQPYQMHSVVTTTMAMKDQLKQQ
QQKPSDDTNQNNLAKSNGNETLRQNHVNHHHHYHHHNHHQPGVLLSGMNNKGRELEEPAT
KTYMKAMAARALWQLAKKNSPICRSITESRALLCFAILLEKGSEDVQYNSAMALMEITAV
AEEDADLRRAAFKPNSPACKAVIDQLLNIIEKADSDLLIPCIKSIGNLARTFRATETRMI
CPLVKLLDEREADISKEACIALTKFACTDNYLHLDHSKAIISAGGVKHLIQLVYFGEQTV
QSYAVILLSYIAFHVPDHEELAQAEVLTVLEWTSKQACLIQDDKIEKLLDDAKGRLELYQ
SRGSRGFH*

>g38662.t1
MGSGALFIFLIFSIQILDSLARTDSNDLAALMAIKSGWKNLPPNWKGSDPCGSSWEGITC
NGSRVVSLMLGGLGLVGSSLGDIPMLKELQYLDLSNNIGLKGTLPPSIGNLKNLSILMLL
KCSFFGPIPDSLGSLTKLIYLSLNSNSFTGPIPPSIGNLSNLSWLDLSENNLSGTIPVSN
GTAPGLDMLLNARHFHLSKNQLSGTIQPQLFSPNMKLIHVILDNNQLTGNIPITLGYVKT
LEVIRLDWNSINGSVPSNLNNLTNINELYLSNNNLIGSIPNLTGMNALNYLDMSNNSFDP
SAFPPWLSSIQSLTTLVMENATLQGPIPVNFFSLPQLQTVALSKNKLNGTLDIGNSYSNS
LALDLQNNSIANFQQKAGYKIKLILVGNPICQGNGAAGKYCEAEDKNSFIPPSNNCASIS
CSSNKILSPNCICSNPYTGTMHFFSSSFSDLQNISYYRTLAGSLISALRSNGVPVDSVNV
SNPSIDVYSYLQFGVQIFPSGKGSFNRTAISTIGFVLNRQLFQLQYFGPFFFIDENYCCF
AGDKKSSHTGAIVGASVGSAVLVMLILTGGFYVYQRKRARREDMKSNPFASWNPDEGNGG
VPQLKGARWFSFDDLSKCTNSFSESNCIGSGGYGKVYKGMLASGQVVAIKRAQRGSMQGA
LEFKTEIELLSRIHHKNVVGLVGFCYDQGEQMLVYEYISNGTLSESLSGKSGIQLDWMRR
LGIALDAARGLTYLHELANPPIIHRDIKSNNILLDDHCNANVADFGLSKLLGDETKGYVT
TQVKGTLGYMDPEYYMTQQLTEKSDVYSFGIVLLELMTAKPPIERGKHIVKVVREAMNKS
EDASYLYEILDPKIGGQGTLEGLEKFLDLAMRCVQESGADRPTMNEVVREIENIMHLSGL
KLNPKAEITSFTPKDSMDTSYQHSLGSGDFDYSVGSLPFSIDRIK*

>g40452.t1
MAVAMASSGTTLGLYTNLKTIEKQPIAKASIFTCSFGSDPVQGFCTFSKKRILSSGGRLI
LQASSATAVEQGESSPETDEVPIPKVIIDQDSDPDATLVEITFGDRLGALLDTMNALKNL
GLSVVKANVYLDSSGKHNKFAITKASTGRKVEDPELLETIRLTVINNMLEYHPESSSQLA
MGSAFGVMQPSQVDVDIATHICIYDEGPERSSLYVETADRAGLLVDLVKIITDINIAVES
GEFDTEGLLAKAKFHVSYKGKAIIKPLQQVLANSLRYYLRRPSTEEASF*

>g69784.t2.5.5bbdf93a
MRNGDASFGECSSSSSVSSQQDIVDDKMISMVLSEEYARLDGTVGQRVSHLAPVPHVPRI
NSYIPVSSDAGLDHERLLQRLNVYGLFEVKVSGDGNCQFRALSDQIYRSPEYHRHVRKEV
VKQLKDYPHLYESYVPMKYKRYYKKMEKSGEWGDHVTLQAAADKFAAKICLLTSFRDTCF
IEIIPQCQAPKRELWLSFWSEVHYNSLYEIRDAPVQHRPRRKHWLF*

>g29264.t1
MDEVKEETLPPGFRFHPTDEELITYYLLNKISDSSFTGRAIADVDLNKCEPWDLPGKAKM
GEKEWYFFSLRDRKYPTGVRTNRATNTGYWKTTGKDKEIYNSVTTELVGMKKTLVFYRGR
APRGEKTNWVMHEYRIHAKSSYRTAKQDEWVVCRVFQKSAGGKKYPSNHSRAVNAYNLEI
GPSALSSQMMQADAFQIPMGRNFMSHAEMQELSRAFRGGSSSVNLPIPSQMNYAAVGGGG
GCFTISGLNLNLGGAASTQQILRPAPPAPPALNQQDVTSSMLTNNVIPHDSGYGAAEINN
ANAMSNRFVAMDHCADLENYWPTY*

>g25201.t1.1.5bbdf93b
MNIIITRRPLVQLGSQFSNQNLIFHSSPLIHKNPDFINLSPRNCSFSPKIITFWSSTASD
ALDYYGGWDHPQLDGGKFDRSSEYTQLQSFLGIGDKKYVFVYLLGFVCALAISRVKVSSI
IGFPASAIVFAVGFSVGFFNGGHISLNGAKKRPKDENFKDFNEKLRNLVDLLSGFDAKIV
NLKNDIENCIECNQISLNDLGSFLKSVESINLGVLDAKSIAEDCMGSVLVENQDVERNLS
QKSSKRRKEVGENGFNFGQFFANLFREKSASSKPVKMKDFSKRESNNVEVNNREEGNTLA
SPAEERTSKWLFNRSAENENEGLLGQTYENHAINQSKAENFVNGARRINTVAENENQEYA
ETRDAVKAVLKSNKYSYQKRRLEYKSNQEVSWKKDRAREIERWSSHDHSLDSMDIRVSLK
HRKTETSFEQEQKPDYLQGNFEDFESIERGEKGDYNSFIRGESVISDNEHSQTNDESTVD
SEDMEFSKCLTEANICLKEAKERLMLQGDDELAEKFLCKSAELLLQAIDIRPMSLLAVGQ
LGNTYLLHGELKLQTSRELRALLARNKLSRDKWDTAEDLVFRKDKISSTLVSVCEECEEL
LINAGRKYRLALSIDGNDMRTMYNWGLALFFRAQLLADIGPVAARDADEVFLAAIDKFDA
MMSKSNVHAPDALFRWGAALQQRSRLRPRKSKEKVKLLRQARRLYEDALDFDCDNIQVRE
ALSSCASELKYWYD*

>g7168.t1
MDTFTSPVVKSLRGLQAGEHHHIPTTGRELYYSSSRFKNSNATTAKSHRATSNSNKLLAP
NFTRSRIFSTSNSTVPFVACSSSSLKQFPPAVHHHQSGERLCSGPFGLSYSMSPLTGCSG
ERC*

>g50564.t1
MRLKKWHGKDLKQIIQKCKDSASISKVHGLMISSGLIGRGISAAQLISSYGRVGDLKFAH
KLLEKLPRRGIDAWNAMIIAYSRKDRPFEVINLYKKMSYEGVKPDSSTFTMAIKACTGLL
DLEMGEEIWERAVQCGYGNDVFVGSSILNLYSKFGKMDEAMGMFEKMPRRDVVCWTAMIT
GFVQSGKVSEAVNVYREMKKVGVEGDGVVILGLIQALANTGDVKMSCSVHGYLIRKDLPL
DVVLQTSLVDMYAKIGELELASRVFWRMPFKNVISWSALISGYSQNGFVANALELFIEMQ
SSGYEPNQVSLVSALLSCSQVGFSKLGKSVHGYIVRRLDMNQVLGTALIDMYAKCGSISC
ARVLCDRMDSRDLICWNAIISSYGIHGHGKEAISLFNQMIASNLTPDHATFASLLSALSH
SGLAGEGRYWFDLMVKEYKIRPSEKHYACLVDLLARAGKVDEAKSLINSMTCEPGLAIWV
ALLSGCHNHKKFSVGDLAARKILELNPDNSGIYTLVSNFFAAAKMWDEVAEIRKLMKQRG
MKKVPGHSVVEVKGKIHAFLTEDKSHPQHKQITKILEKLEQQMIALGYSPKTEFVLHNLE
EDVKVKMLCNHSERLAIAFALLNTGPGTRLLITKNLRVCGDCHDVIKLISTITKREIIVR
DVKRFHHFKDGLCSCSDYW*

>g67999.t1
MGGLCGASLRDTWDRFFDRCSRFFPCLSDPARRSALFLKVALVVLHVIYVGILFVFDKDL
IDKTKQQPWYTAIYLLLFVATLAQYFLTSNSSPGYVLDAMRVVNESDALVRRTSMTSKQP
ASSKNGSVVITVDRNQLGRNLLGSNPTSWTKLVMDMYPPGSSVRTWTCSYCNVLQPPRAK
HCHDCDKCVLQFDHHCVWLGTCIGQGNHCRFWWYICEETALCLWTGVLYISYLKSNISKA
WWVDIIMILLLITLCISVIFLVLLLLFHSYLIMTNQTTYELVRRRRIPYLRGIPERVYPF
SKGVCRNLYDFCFARSMFFKMERLPTAQELEEKSRPYTCWDALTCRCCC*

>g44467.t2
MDSSPEQLSKPNNSTPSPPLSDTSLQVQESPVFSYLSNLSPIKPDKAAPVAQGFPGINSP
PLVFRSPQINPNGQQAFLKRPQFAGSSDAKLSGHDKSCADTVTVGEESGISVSASSANFT
PKSSEDFLKSQNDFSDLKDSGENTEDKDGTRTDEVKMGASLVLEQVEEDDLTHSSSDVKS
VVLDQKTGDGNMPPDVHQNVEPDKSVDHAFKYQHGVHLNAENAGSGHVFEVRCASPSESL
QIAEHSGSRLENAGVPSAEAIERKMHDHSPKVIQQQHGISRRLQFEDAIGKIIQNTGFQN
SSGNGGCPRSPASPANSEVLESASLNKPASPSNRLLANMTPSFFSPQSSGNCNMNVPKPS
GIGLHLNSIVNSMQVGSERGRFDGIANSASLMSPYSMNPLYEAVLSKAIELQSDFSNKRM
SNSETSDSLEDFSQSSPKKKRKKTLDTGDSNGCKRCNCKKTKCLKLYCDCFAAGIYCAEP
CACQGCFNRPEYEDTVLETRQQIESRNPLAFAPKIIQHLTEPPTNVCVEDGAHFTPSSAR
HKRGCNCKKSKCLKKYCECYQANVGCSDGCRCEACENIYGQKGEFSTIKDLISKHSEKLD
SSLDTMESLAPKDDLLHNELYNPHNLTPLTPSLQCSDHGKGPSKAWLSSAGYLQSPESGE
TFITPYGLPPEQATNPDNHDMIPEANTEAMDLVSFGQGLDYGNGHTVNQFIPRSGVPGYA
GHFTSVPNLQDWANTSRAQIFPGNRQVSSANSLRWRSSPITLSTHSEGTKLQEVVDSDGL
YSILDDDTPEILKETPEPPNAVKVSSPNKKRVSPPHGRRTELSSSSSAGLRTGRKFILQA
VPSFPPLTPCIDSKGGNGVNNSQNSSGSK*

>g15293.t1
MEEVKLFGHWGSPFSSRVEIALKIKGVQYENIVEDLSNKSDLLLQYNPVTKKIPVLLHNG
KPIVESVVIVEYIDEVWKTNPILPQDPYEKAKARFWAKFVEEKCLPALFKTIWSVGEQYE
KDKAEAVEVLKFLEDEMEGKKFFGGESIGLVDIVANFIAFWFRTFQEALGLDVLTKDNFP
KLWEWAEEYVNCSHIMKCLPPKDKLIANFPPPYMGEHLVTIFRSRLAAAAAK*

>g4702.t1
MMLKAAPAFGLLNPKGENLGPLFSGVPTQFSPSVLKKNNFPAFVVCATRGSNDKPLTGVI
FEPFEEVKKELMLVPSGSKDSLARYKYVDECESAINEQINVEYTVSYVYHAMYAYFDRDN
VALKGLAKFFKESSEEERDHAEKFMEYQNKRGGRVKLHCIDSPLSEFDHPEKGDALYAME
LALSLEKLTNERLLNLQAVAARNNDPQMTDFVESEFLAEQVEAIKKISEYVAQLRRVGKG
HGVWHFDQMLLHEEEAVAA*

>g60753.t1.2.5bbdf93e
MAVLREPKKGTEDSETADDYVDNLSMFQEQYGQSQKPLDFENNGLIWYPPSPAYEDEETG
NNFFTYDDEDDDIVDTNGPFCYSGNVDQKEPLRAVVQGHFRALVSQLLQAEGINVGNEND
STDWLDIVTAVAWQAANFVKPDTSRGGSMDPVDYVKVKCIASGSPSESTIIKGVVCRKNI
KHKRMTSQYKNPRLLLLGGALEFQGITNQLESFDVLRQQEIDHLKMVVSKIEALRTNVVL
VEKSVSSYAQEYLLAKDISLVLNVKRPLLERIARCTGALITPAVEKISTARLGSCELFQL
EKISEEHEPVNQSNKKPSKTLMFFGGCPRRLGCTVLLKGSCREELKKVKHVVHYAVFAAY
HLSLETSFLADEGASLPKMIAKPSISIKEGISTDNVSTTITNSVVSSHYQEVANAPPIAL
GSDGPDLEPYFQQSLSAQCNSDHNAATAIEECSYETFPFDAHVGHSISDIGLDHVSSLFF
SDIQNHIQEDSKTGQEECQAVEVSEVAKVQRVDKTEESIEYYSATDTNESILVSFSSRCV
LNETICERSRLLRIKFYGASDKPLGRYLQDDLFDQTSCCHSCKEPTEAHVICYTHQQGNL
TINVKRLPSVKLPGEGDGKIWMWHRCLRCAPVDGIPPATNRVVMSDAAWGLSFGKFLELS
FSNHATANRVANCGHSLQRDCLRYYGCGSMVAFFRYSPIDILSVCLPPAILDFNASGQEW
TRNEAAELLRKAEALYAEISGVLRNIEEKLSSLGHEFSDASELHNHVIELKDLLIKENDY
YTGMLRIADKETLKPAEASIDILEINRLRHSLLIVSHIWDCRVFSLNYLLTRSSSSKVPV
RCETFVKHSSFEYLHEDVPEVPKFQECVMESVKSEREANILPHRFCIFEDSVSASYEHGR
EEEMLKDGEDAVDNTSQMYVPTAAAVLSDTIDSVWIGTGKLSEKAQLHNLLQPDGAEDIP
YKQINQIDNRQHKRVTSPARVYSFDSAVRLQERIGKGLPPSSLHLLMLKSFHASGDYRSM
IRDPVANVQRTYSQMLPSEAQKYDLLRNASPSFASFTSLLSDGARLMIPQNSQYKMVLAV
YDNEPTSIISYALSSKEHEEWVNGKPDGPGGSLNAGDFNTEHSVTSNISGWQSFSSLDLD
YIHYGNYGSEDALTAIDSIFADHKTSPHLRISFENESSSVWGKVKLSVTCYFAKQFDALR
KKCCPSEMDFIRSLCRCRRWSAQGGKSNVYFAKSLDERFVIKQVTKTELESFEEFAPDYF
KYLTDSLNSGSPTCLAKVLGIYQVGIKHLKGGKETKMDLMVMENLFFRRKISRVYDLKGS
ARSRYNADTTGADKVLLDMNLLETLRTKPIFLGSKAKRSLERAVWNDTSFLASVDVMDYS
LLVGIDDENKELVLGIIDFMRQYTWDKHLETWVKASGILGGPKNASPTIVSPEQYKKRFR
KAMTTYFHTVPDQWSA*

>g4739.t1
MENKNSEASGSTEYEDLLPVMAEKLDVDTFVGELCGGFRLLADPTSGLITSASLQKNCAL
LGMDGMSREDAEAMVKEGDLDGDGALNQTEFCILMVRLSPGMMEDAEAWLEKAIAKEVKG
QPSA*

>g76971.t1
MAGEQMKPVAGLLLVLNFCMYVIILGIGSWAMNRAIDHGFIIGAGFDLPAHFSPIYFPMG
NAATGFFVLFAMIAGVVGVASAITGLNHLRFWDTDSLPAAASAATIAWSLTLLAMGFACK
EIELRIRNARLRTMEAFLIILAATQILYIAAIHGASSRRRA*

>g30951.t1
MITDSYSKMMSEIGMRSSVMSGSDDYGEELEMLLREQQRRQQEASDVERELSIFRSGSAP
PTVEGSFSGLFDGRSSGGGGRGGLSAEEIRSDPAYIDYYYSNKNLNPRLPPPLLSKEDWR
FAQRLQGGGNGGSGGGGGGSSAAIGDRRKVVGGSVGDGGSINRSLFSVQPEFGGKKEENL
MDLQKEWGGDGLIGLPGPGLVRRQKSFAEIIQDDANQAIPVSGHPSRPASRAFDNILESS
ESQFAHQQQELRSVDSLLSGANILGMSALQNVGSSASQSYASALGTSLSRSTTPDPHLVA
RAPSPRIPPVGGGRMSSLDKRNANIVKSSDDVFPDTDVHADLAAALSGMRLSANNMVDEG
KHTASQIHHENLYHLQNDQNPVKQYSLLNKPEKIQFHKSTIESYLKGPSTLTHNIGGNSP
SQYPKIDSPNSSFAKYGLGSGAVNPGSPSMLGSQLGSGGLSPLLENTAAAGAMGVDSRAV
AGGLNLGPNLFAAAAELQNLNRVGTQNSGSALQMPLMDPLYLQYAAAHAAALNDPLLDKE
SVGNSYMELLEMQKSYLETLLLHQKSQYGLPYLGKSSNLSHGYYGNPGFGLRMSYAGSPL
GGQILPNSPIGTGSSVTHGDRNMHFPSGMRNLSGNVMGSWHLDLGSSLEESFASSLLDQF
KSNKTKCFELSEIAGHVVEFSADQYGSRFIQQKLETATTEEKSMVFHEIMQQALSLMTDV
FGNYVIQKFFEHGSPEQIRELADQLNGHVLALSLQMYGCRVIQKAIEVVDLDQQTKMVAE
LDGHVMRCVRDQNGNHVIQKCIECIPEDAIHFIVSVFYDQVVTLSTHPYGCRVIQRVLEH
CHDPKTQSIVMDQILQSVCMLAQDQYGNYVVQHVLEHGKPDERTSIINKLIGQIVQMSQQ
KFASNVVEKCLTFGTPEERQTLVNEMLGSTDENEPLQVMMKDQFANYVVQKVLETCDDQQ
LELILNRIKVHLNALKKYTYGKHIVARVEKLVAAGERRIGILSSCSAA*

>g41086.t1
MSFSFFKPSRPKTPQELAKAIKDSLMALDSKTVAEVKALEKAMEEVEKNIMTMRVMLSGD
GEVEPNVDQVSQVAIEICNEDVIALFIHKLPILGWEARKNLVHCWSILLKQKVDSICCCV
QYLENHLELLDFFVVCYDNKEIALHCGSMLRECIKVPSLAKYILESPSFELFFKFVELPN
FDVSSDAFSTFKDLLTKHASAVSEFLSDHYNEFFEQYETLLSSKNYVTRRQSLKLLSEFL
LEPPNSHIMKRYITEVHHLKVMMTLLKDSSKNIQISAFHIFKVFVANPNKPREIKVILAK
NHEKLLALLRDLSAGKGGEDEQFEEEKEMIIKEIERLSRLPNLES*

>g33230.t1
MDFVDARRKSQFSRKIILAAGIIMLFIFVFKKSPDFSGSSKFSQLEPGVTHVLVTGGAGY
IGSHATLRLLKDSYRVTIVDNLSRGNLGAVKVLQELFPEPGRLQFIYADLGDAAAVNKIF
SQNAFDAVMHFAAVAYVGESTAEPLRYYHNITSNTLLLVKAMAAHGVKTLIYSSTCATYG
EPEKMPITEDTPQVPINPYGKAKKMAEDIILDFSKTSDMAVMILRYFNVIGSDPEGRLGE
APRPELREQGRISGACFDAARGIIPGLKVCKDVVTIILGAIVVIVVYS*

>g70678.t1
MYDVVLNMLGITPSHNTPSLLFSVFNATVLSFMSHIFSKPGLEYPFPEIYLRNFELRKIY
NITVDGQQPPNDAIRDPRPMLVNACRNMEAKYLDYAASFANGKIYPVGPLIQYPDETQDK
EDDDELINWLRRKNACSTVYVSFGSECTLTKEEIKEIALGLELSKVNFIWVLRFPKGEDL
IGLKEMLPEGFLDRVKERGKIVQGWAPQARILGQSSIGGFITHCGRNSILECIEFCVPII
AIPMDFEHPLNARLMVSFGVAVEVMGEETQKFRGLEIAKVIKDVVTGDVGKVMRQKMKDL
SKNLKSTQKEDLDGVVRMLALLRKVLIDASYSTTSTATA*

>g2608.t1
MFLGLTNGLFGRFNGGAPSRDPDSACFSFGSAYQAASLILRRGLSSSAADNHGPAKVNCW
QEPMNPANWKEEHVSFLDFYFFFSLFQNFFILNLFLY*

>g54343.t2
MEMAHQGKLKCANMFINPSQNNDFVLFCMSFRFSAESTGHQMSSRLLSMKSANALLELPA
SSKLITVGTSVSAIVISDIRGISRSQSFQSMEIKGDRKGSKSEKVDVGEPSEGSEIRVAI
LTVSDTVASGNGPDRSGPRAISVVNSASEKLGGARVAATAVVPDDVSQIKDILLSWSDVE
KMDLILTLGGTGFTPRDVTPEATKIVIEKETPSLLYVMMQESLKVTPFAMLLRTAAGIRG
TTLIINMPGNANAVAECMEALLPALKHALKQIRGDKREKHPRHVPHAEAAPSDTWERSFQ
SASNNEQKPGCSCSH*

>g29722.t1
MHSKTSTSLAPGFRFHPTDEELVRYYLRRKLFGKPFRFDAISEVDIYKAEPWELPGKSRL
KTRDLEWYFFSVLDKKYDNGSRTNRATEGGYWKTTGKDRAVYHRSQVVGMKKTLVYHSGR
APKGQRTNWVMHEYRLIDEELKKAGIVQDAFVLCRVFQKSGSGPKNGEQYGAPFIEEEWE
VDELEMVPKVEAAEEVEVGDDAFWDGIDLDQILGTGIPPNNDPVPLNFDTWENVACGEEN
TDSSNDAQKLLVTNIPLDFYPGENVACDKEITDSNNDTQKLLVGTGEYNCVPEQSDDQNY
YNLPGQYDLHQKAVRHEYIGEPSKKFDAENVNYLLDEPYVDALDNLQFDDGAFLETNDLL
NPIAADTSAFGLLDDYLTFYDADGEISQYMPSELPEATGINEALVSGQASIPEKDLKEET
QPSVESSEKVLGHNVASTSNEELTKEYSTDFQYPFIKQASHMLGSIPAPPAFASEFPSKD
ATLRLYPSSHASSTAHVTAGMIQIGNIGLGGHGMDWFSGKHGRYNVVLSFGLSRGDDNST
TLESVVSIHPGKTAGSGMSRDWFYFIFCWVLFLSVSFKIGAYICAW*

>g59987.t1
MPANLWTLFFFLPLLTFPFSLLIPAASAVNQQGEALLSWKRSLNGSLQGLSDWDPTDETP
CQWNGITCNFNKEVTELSLKYMDLFGNVPNNFTSLFSLNKLVLSGTNLSGTIPKEIGNLQ
ELRFLDLSDNALTGEFPSELCHLPKLEQLYLNSNRLEGSIPAEIGNLTSLIWLIIYDNQL
SGAIPSSIGNLKKVEVIRAGGNKNLQGSLPQEIGNCTNLVTLGLAETSISGFLPPSLGLL
KNLETIAIYTALLSGQIPPELGDCASLQNIYLYENSLTGSIPTSLGNLQNLQNLLLWQNN
LVGTIPPELGNCKQMLVIDASLNSITGSIPETFGNLRSLQELQLSVNQISGRIPSQLGNC
TALTYIELDNNQITGTIPSEFGNLSNLTLLFLWANRLNGDIPSSLSSCRNLEAIDLSQNA
LTGTIPKGIFELQNLNKLLLLSNNLSGTIPPEIGKCSSLIRFRANDNEITGSIPPAIGNL
KNLSFLDLGSNRLTGVIPVEISGCRNLTFLDLHSNSIGGNLPENLTSLVSLQFVDVSDNV
MEGLLSPSLSSLTSLTKLVLGKNKFSGPIPSQLGSCFKLQLLDLSSNGFSGQIPTSLGKI
PALEIALNLSWNSLSGYIPDEFKALDKLGVLDISHNQLTGDLHVLADLQNLVVLNISHNN
FSGHVPDTPFFSKLPLNVLAGNQELCFSGNECSSDKGGADRRSKGARVAMVVLLCTACVL
LLAALYIVLGNRKRGRGAHIDSDDDDVEMAPPWEVTVYQKLDLSIGDIAKSLTPGNVIGR
GHSGTVYRAILPSGMSLAVKRFRASEKLSASAFSSEIATLARIRHRNIVRLVGWAANRKT
KLLFYDYLPNGTLGSLLHEGRGGGGFLIEWETRFKIGLGVAEGLAYLHHDCLPAIIHRDV
KTHNILLGDRYEPCLADFGLARLVEDENRSFSGHPQFAGSYGYFAPEYGCMLKITEKTDV
FSYGVVLLEIITGKKPVDPSFPENQHLIQWVRDHLKSKKDPVDIIDPRLQGHPDTQIQEM
LQALGIALLCTSNRADDRPTMKDVVALLKGIRHDHDPASATAGGEVHKPANKSDKSSAEV
SSCLSTSSSSVTPARLLLLQGSSNCSFGYSSSSASYHSRNQ*

>g39865.t1
MGVDNAIGGRSLEVEKRTEVWLLVLCSVGVLEMIRQFVNDFCICGIRLSTVGIWWYGSVL
GSGLVDYVLGNCRAKIGGYVLVVVGLWQYKGENLGKIRGCFVAFCVGSGGEEVGVVKSVV
MQWFWVV*

>g37038.t1
MSLKGKLVNQIEIKSDGDVFHEIFRYRPHHISTMSPTNVQGCDLHDGDWGKVGSVIFWNY
THDGKQKVAKDIIEAIDEAKKSVTFKVVEGDLMELYKTFFITVHVDNLGESNLVTWTLEY
EKQKVNVPDPNTFMDLCLNITKDIETHHLK*

>g9033.t1
MMMRPPETEFFLQWGNRKRLRCVRIRSNTSPPHHLSSSASDLSSTTTRIRRKITSRFLSV
SSNHDEKQLSFPQPPSRLTRNSAEAAVTLRSENRRVSPEKEERSYTTRGSVSMVGNLEEN
GRVNHGVDVHGGGDEHNNNNGHGSRGGGVVWPKLCITLSSKEKEEDFMAMKGCKLPQRPK
KRAKVIQRTLLLVSPGAWLTDMSLERYEVREKKTSKKRPRGLKAMGNVDSDSD*

>g42305.t1
MCSRSKFLVLGFLVAVMMFNVSAIDGEFSHCHCDDDGGWSIVSILECQRVSDFLIAVAYF
SIPVELLYFISCSNVPFKWVLLQFIAFIVLCGLTHLLNAWTYYGRHSFQLMMALTVAKIL
TALVSCATAITLITLIPIVLKFKVRELFLRQNVMELGQEVGMMKKQKEASWHVRMLTQEI
RKSLDKHTILYTTLVELSKTLDLQNCAVWMPNGSRTEMNLTHQLSPGPSEEYSRTLPINE
PDVLEITQNKGVRFLRQDSVLGAASSGGREPGAVAAIRMPVLHGSNFKGGTPEVIDTGYA
ILVLVLRSANDRVWSYNEMEIVEVVADQVAVALSHASVLEDTRSMRKKLEEQNRVLQKAK
ENAMMASQARNSFQKVMNNGMRRPMHSVLGLISMFQDENLSPDQRIVVDTITNTSSVLST
LINDAMEISDKDEGRFPLEIMPFKLHSMVREASCLVKCLCLYKHFGFSIEIPNILPNQVM
GDQKRALQVLLHMIGHLVNVNEGSASVTFRVVSESGIQYGNDKYWDTRRTNTTDEYVNVK
FEIEVNVEGSQSDSSISTTHFGGTSHNNKEVKEGLSFSMCKKLVQLMQGNIWMSLDSQGR
ARSMTLILRFHKQSSFRRHVFELGNPLEQPISSLMFKGLQVILADDDDTNRMVTKKLLEK
LGCQVTAVSSGFQCLSTLGPSATAFQVVVLDLHMPEMDGFEVATRIRKFRSRNWPLIVAL
TASAEDHVLEKCLQVGMNGLVRKPVLLQGMADELRRVLQRAGDGLRENII*

>g17262.t1
MCASDLRELELHWTYSESAQMDFLPHQTSSLSDHFCEELLIATNRNELNRFLITRRPLCQ
KLATIPETGDFTAALPATGETEVSKIVPLTHAGLAQNDTPFLSSSTTPPPILDELLC*

>g61748.t1
MGNGIRIPLSFLFILAFFLLSAPQISAVDYPINVWPKPTIFSWPQPQVTLLSPNFTINSP
SNPYLISAAKRYLKQFLGEHHTPLVVPLLNLTSSNPLNCLKIKVTDDSVPLTHAVNESYT
LSIPSPYESTTATLTAETIWGAMRGLESFSQLVYGSPSRVAAGVYISDQPLYPHRGVMLD
TSRNFYTVGDLMRLIKAMSMNKLNVFHWHITDAHSFPLVLPSEPALAGKGAYGQLMKYTP
DDVKLVVEFGMENGVRVVPEIDMPAHTGSWVEAYPDIVTCANMFWFPAEAKWPDLLAAEP
GTGQLNPLSPNTYKVAKNVIHDVINMFPDQFYHAGADEVVPNCWKSDPAIQDFLAKNGTL
SELLELFVNSTLPYIVSQNRTVVYWEDVLLDDNINVAASLLPQENIILQTWNNGPNNTKR
LVEAGYRVIVSSADYYYLDCGHGDFLGNDSQYNQPPGTNLSNGGSWCGPFKTWQTIYNYD
ITYGLNEEEAKLVLGGEVALWSEQSDSTVMDPRIWPRASAMAETLWSGNRDSTGMKRYAD
ATDRLNEWRNRMVSRGIGAEPIQPLWCIRNKGMCNTVHPFVAS*

>g41962.t1
MEDCGSVQSLNSVPVSVPPSTNAEDRSLVGSNGEASFTSSKDIAILIGILEYLNKEKTYP
NLANSAAVVDFVEKWLHMDYALHEPSDIYHRTEALRKKYFASLRSENGKPRVSSPIDDRV
NFRLSHMIWGWGAENVASSSGYVAIKETVKIFGADDVKVSAGPSTLKRPLEIVDQGYDPE
SKKIKMAGKDLGDIEILKAMQGSFSENKAYPVSKP*

>g54825.t1
MLGRRFLLLCIIIFLISFASSEAGIPTKLPSAVIVGTVYCDTCFRQDFSKSSHFISGASV
AVQCGDENSKPSFREVTKTNKHGEFKVNLPLSVSKHVKKIKGCSVKLISSSESYCAVAST
ATSSSIHLKSRKDGTHVFSAGFFTFKPLKQPELCNQKPSVPKPKKPLNIGKLSSISYPNA
KFLPPIQDPPSSDLPPFGQYLPPLPQLPHPLPLPELPPLPTLPGLPTPPVPAKSVSKNSR
RTTQLSDEKVVRPKIFNPIPLPPNPLLPPPSIIPPFPNPLQPPPSILPPVFPSPPPSIFP
PLFPSPPPSIFPPIIPSPPKSPPSIFPPIIPSPPTPPPSIFPPIIPSPPTPPPSTFPPIF
PVPISPPSFPFPPLIPGLTPSPPPPPPPFFRFPLPPFPFQPTPGFPGVPPAIPSPSASDK
SSP*

>g46873.t1
MDAWMETMEEIINKQAVMETFVDILLCAVPIWLAIMIGLFIGWSWKPRWTGLVFLGLRSK
LRFVWTAPPGFGARRLWLAFTALSAFSVGHRLLFRSRGRNRHKDSASAVATVGQLAPPGA
DSPAASAQTPSAESSADDIIRPITGTFEAESDVVTENDLEHFLHLLDGKDGEMAWQRMME
RSTTNLAYQAWRHELETGPIVFRSKTLFEDATPDLVRDFFWDDEFRPRWDPMLVYVKILE
EFPHNGSMIVHWIKKFPFFCSDREYIIGRRIWESGGTYYCVTKGVPYPALPRRDKPRRVD
LYFSSWVIKPVQSLKGDGQLSACEVTLIHYEDMGIPKDVAKLGVRHGMWGTVKKLHGGFR
AYQNVRKSESSLSRCALMARITTKISSDEGTDSLAPECSEEQKADSSDIQVHRSKGGIDW
RWVAIGGAVVAVGLHTGMIGKALLLAAGQRATRRRGNSR*

>g58493.t1
MSNEAQFLNLPFHLINDILSRLPTRTIIRCKCVCKTWLNLLSGSEFINLHLSRSPPCLIV
YKEDAFSSDPSCFSLVEFEDELDRHNFLYVPENKIKPPKICAENGMHMTMIGTINGLVCL
REHGYRHDELYLWNPSTQELITLPKTEEVRSCLNIVSYAFGLSSQTGQYKVIRVMQEKKI
EGNTSRVLKSNCDVYTLGEENQGLGLWRRIENASFVFYFRSYGVFLNGNLHWLINENGNI
DDDPDSMSCFDLEKELFVPFPAPPGLSKGHNLAGLEVVRGCLSLCDKSSEYEIVIWVMKE
YGITKQWIKEIVIDLEPPDEFLSPEPDEVVRVLKFFKDGDVLLLWGGELLLSYDSRRKIL
HQSSVHRLLNDDEMDEEDCVEGSYSCIDAIEYVSSFISIKNFGIEVTQKNKKRKKKKRKE
LWD*

>g70102.t1.2.5bbdf937
MAQDGFIVPADSTIKNKTAVSRSWMLLDSSGEGSVLDLDRQAIMKRVPINARDLRILDPM
LSYPSTILGREKAIVLNLEHIKAIITTEEVLIRDPLDDDVVPIVEELQRRLPLAIGQGEE
VDDDHPKMRNEVETDSETEFPFEFRALEVALEGICSFLDARTRELESDAYPALDELTSKI
SSRNLERVRKIKSAMTRLTSRVQKVRDELEQLLDDDDDMADLYLSRKLAGASSPVNGQGI
PNWFPASPTLCSKISKGSRTSGLTTQSTENDVEELEMLLEVM*

>g25024.t1
MGKSSVIIYITVAVLLLLFISKSPKNPNHQNHRQRHHRLKLRSNFTFTPLSLNHHEHHVA
FDPLVTEIERKREDRKWEKKYFENHHPELTQSSMSQHGGSGEAMAAESQPEWEDFIDAED
YLNDEERFNVTNRLVVLFPKIDVDPIDGFITVPELTRWHLEQSEKEVLHRTRRELEIHDK
NKDGFVSFSEYEPPSWVKTSDNNDSFGYDMGWWKEQHFNASDADGDGLLNITEFNDFLHP
ADTKNPKLIHWLCKEEIRERDSDRDGKVSFKEFFHGLFDLVRNYDEEGHNSEHQSDDSQE
TIAMKLFAQLDKDGDGFLSDAELLPMIRKLHPSEHYYAKHQAEYIIKQADSDKDGRLTLT
EMIDSPFAFYSAVFNDDENEGLDYHDEFR*

>g13503.t1
MASDLSLEEIKNEQIDLENIPIEEVFKQLRCTREGLSSDEGAKRLEIFGPNKLEEKKESK
VLKFLGFMWNPLSWVMECAAIMAIALANGGGKAPDWQDFVGIVVLLIINSTISFIEENNA
GNAAAALMAGLAPKTKVLREGKWSEQDAAILVPGDLISVKLGDIIPADARLLEGDPLKID
QSALTGESLPVTKHPGDGVYSGSTCKQGEIEAVVIATGVHTFFGKAAHLVDSTNQVGHFQ
KVLTAIGNFCICSIAVGMVIEIVVMYPIQHRRYREGIDNLLVLLIGGIPIAMPTVLSVTM
AIGSHRLSQQGAITKRMTAIEEMAGMDVLCSDKTGTLTLNKLTVDKQLIEVFPKNMDKDT
VVLYAARASRTENQDAIDASIVGMLSDPIEARAGITEVHFLPFNPVDKRTAITYIDSDGN
WHRSSKGAPEQIIELCDLKGEVKKKAHDIIDNFANRGLRSLGVARQAVPEKSKESEGDPW
EFVGLLPLFDPPRHDSAETIRQALDLGVNVKMITGDQLAIGKETGRRLGMGTNMYPSSSL
LGQSKDESIASIPVDELIEKADGFAGVFPEHKYEIVKKLQERKHICGMTGDGVNDAPALK
RADIGIAVADATDAARSASDIVLTEPGLSVIVSAVLTSRAIFQRMKNYTIYAVSITIRIV
LGFLLIALIWKFDFSPFMVLIIAILNDGTIMTISKDRVKPSPVPDSWKLKEIFATGVVLG
TYLAIMTVLFFYLASDTDFFSNVFKVRSIRGHPDELTAALYLQVSIISQALIFVTRSRSW
SFVERPGILLVAAFLLAQLLATLIAVYATWSFARIQGIGWGWAGIIWIFSIVTYFPLDVL
KFVIRYALSGKAWDSMIQNKTAFTTKKDYGRGEREAQWALAQRTLHGLQTPDSAGLFNDK
HYRELSEIAEQAKRRAEVARYRHEHSIEMPKFQSDRRRN*

>g47527.t1.10.5bbdf934
MLKQKSRMFQTRLKWKNLRSIAGITIVVLLAFVVVTAEQEPEQGVSENNRKTNEYASGYL
WENGKMIYRHVWPEMKFSWQIVLGTVIAFFGAAFGSVGGVGGGGIFVPMLTLIIGFDPKS
STAVSKCMITGAAGASVYYNLRLRHPTLDLPIIDYDLALLFQPMLVLGISIGVAFNVIFA
DWMVTVLLILLFIGTSTKAFFKGVETWKKETIIKQEAAKFLASSGTSGEPGPYKVLPGGP
SSDITIRQNVNEKSEVSIIANICWKELCILIGVWGIILFLQITKENYTRTCSMAYWILNL
LQVLYLTILKEREPYSYWRCSRQRSRGGFTGPGSIAKLQVLRPGSLFLTPVGVCFTFASK
*

>g76698.t1
MESEDEMLMHDANDVESLDDDFYSGDGGGGDSDDADAIMDYDFIDNDSDDSDDLTSYHRS
QPNYTILSEADIHQRQEENIAQVSMVLSISRIAASILLRHYNWSVSKVNDEWFADEEKVR
RLVGLLEYPVPLPYAEELTCGICFETYPSDRMSSAACGHPFCVTCWQGCHLVHNGMAWIY
LWLCEINDPLKPEK*

>g71431.t1
MPFFRPSPGDVAGFKVLFCLGIMYGVISLLVHSVLHMKFITPLGIDAPLDRFSEARAVEH
VRVLSKDIGGRQEGRPGLKQAALYIKTQLEMMKERAGPNVRIEIEETTVNGSFNMIFLRH
SISLAYRNHTNILMRISSLDSQENDPSVLLNGHFDSPPGSPGAGDCGSCVASMLELARLC
VDSAWVPPRPVIFLFNGAEELYMLGSHGFMRTHRWRDTVGAFINVEASGTGGTDLVCQSG
PGSWPSYIYAQAALYPMANSVAQDFFGSIPGDTDYRMFAQDYGDIPGLDIIFLFGGYFYH
TSSDTVERLLPGSIQARGDNLFRVVKAFTNSSMLQTAHERESLRHAANSDERAVFFDYFT
WFMVFYPRRLAVLFHSIPLAIFLLMPIFLRFPNKVFSCSIMTLSDFIKGMLHHALGIVLA
IIFPVIFAILRLLFSRHSMNWFSNSWLAFLMFIPCSLVGLLAPRFFWKSFPLSQSVAIMK
SSKEELAGEARFWGAFGLYSFMTLGYLIAGLNGGFVTFLLAVFMLPAWISFRLSTKSFGL
DSLRSTACYVIPLIPCLMYSVYFGGFLAAFLIEKVGMTGSLPPPYGYFVPDIVVAAVVGL
VTGWCVGPLLPVVGNWLARSSVMQFLLHGSILALALSSQFFPYSTDAPKRVVFQHTIRTA
GASHIEDASYDFSVVDSNSLLFIFKHAPELARELHIDSELSFETASLSLRETWVGTFPIV
NLFSGSLKFVAERDDVLKQYRRFPYLTTYKPQALFDGGSRRIYLEFSLGSLKEVWVAVLN
ITGPLSSWSFANSTLPAPEMVDNGPPSYICRLSGASHENWTFWLEARSSEPLRVVVAVVD
QHLTESATKLKSLFPNWIDVTAFSSFMSSYVF*

>g24781.t1
MGRSPCCEKVGLKKGTWTPEEDQKLLSYIERHGHGSWHALPTKAGLQRCGKSCRLRWTNY
LRPDIKRGKFSSQEEQSIIQLHALLGNRWSAIAAHLPKRTDNEIKNYWNTHLKKKLTKMG
IDPTTHKPQTNALSSVQTKDTANLNHMAQWESARLEAESRHVRESKLISTAPYYSDLGYF
ASAQVPLSKATVSPILPPLQPKIPPCLDILKAWQGTWTTKPNDIFTSNGSLHSPTSTLHL
SDNTFTKCATPVFSENLLFPTLIDYESGIVKDSGQVNQDQLQVETRMEGSMDNTMQFNDI
EYHIDAAYTEDPLRASIFMDSNNTTEPLIHNLDSSLGGGLEDNRKYWNNVFNLDTYALGS
PSF*

>g26418.t1
MAEHDRPLPKFGEWDVNDPASAEGFTVIFNKARNEKKTGGKPDSPQKGASAYKHKATLGK
PQSNLKIKLXXXXRRYATLDP*

>g58754.t1.1.5bbdf941
MPIIDKFKDMGTVVMGKVESGSIREGDNLLVMPNKAQVKVVAIFCDEDRVSRAGPGENLR
VRISGVEEDDILDGFVLSSVARPIPAVSEFVAQLQILELLDNAIFTAGYKAVLHIHAIVE
ECEIVELMQQIDPKTKKPMKKKPLFVKNGAVVVCRVQANNLICVEKFSDFPQLGRFTFRT
EGKTVAVGKVTGLPSIEDNA*

>g19778.1.t1
MMEMMGKSRIEAFMSWFVRVHPHETSALFYSTSTFFFILSAYFVVLPLRDEGAISLGLGK
LPGLFVGSLFLTLVSAPLSTLIFSLPHLSKRKALVFIHRFFGASLVVFFILWFSSSPRTA
GFSFKGLLHVSSPIKEELKVELHQANPPSSNGWGNNGWFYNSVRISLFLWVALLNLITIS
STWARVIDVMDTESGSRLFGFIGAGATLGQLFGSVFAAVTVWLGPYLLLFAAILMELAAQ
SAKGIDKDISRLPEEQFPIRKSDIDHLSAADEQTEPADKRSSPKLSSTASNPQFWTILDG
LHLILTSNYLLLVALFLWLSAVVSSFFYFQKVTVIATSFASPIDRRRLFAQINSFIAVFI
LAGQLSVTGRILTIFGITTAISCAPFVGIINLIVIAVWPTWIAVAACETLRKVCLFTCWM
G*

>g75137.t1.1.5bbdf935
MLLTSNEHCIGRAVKDVTFQIVSPAVSANHCKIYRKSVAAVDGENSSSFFTSVFLKDSST
NGTYLNWEKLNKGSIEAKLCHGDIISVAFPPDHGCAVAFVYREVLKLSSQGDSASLKRKS
EEPGSESKRLKGIGIGALEGPISLDDFRSLQRSNTELRKMLEDQVVTIESLRTENRASIE
RHEINMKDLKESISESYLGQVKELQQLLEAKENELIELNRISAEQKQSVEDLNERLTASM
QSCAEANEVISSQKASISELKAILDEEREQRREERQKAVADLKTSIQRIQAEAREEMQRL
SDAALKREKEQQEVINKLQESEKERCLLVETLRSKLEDTREKLVVSENKVRQLEAQVREE
QLAAATRRKRVDELELDTKRLRKELESEKAAREEAWAKVSALELEINTAMRDLDFERRRL
KGARERIMLRETQLRAFYSTTEEIQVLFAKQQEQLKAMQRTLEDEENYQNTSVDMDLNLP
NGRIQGFLSREKELIYHCRNPAKEGSNTSTPSYGRDQNEVSSDEVSVTEKHDCNVKIHGN
DEDTQEVEFTSAQHSVKGGFGSDVDGVGTAPILEADPVGIEKNLEIDGTGTAALSVGDLV
ATERILETESPGQNRCGNLDLNKYGVMGEDTMQLDDETNGEAMGQAKMISQGRLHHSQSN
NLLEVQNTMLDTQAGGSIRTADLLASEVPGSWACSTAPSVHGENYSPKSKDNDDDDAAAA
LHDSMGMVAESQNAPSSKTVGAGWNQEHKALGEMIGNVGPDLKEQFSCPVGSNYKKEGTG
RGDASDSDTEGCYDGNDNHEENTEGESDEETIGSGREKEDMGSDDAMDEDDEATQDDSYG
*

>g60893.t1
MEECNSENDSRKRSRDDSGELDSNSPESKRVNASTDSDIIPLESALIDTDIKPDSPDSNK
CQDDSDNNSTESNRAENELNSPDVVKFRADILDMPDEPDVEIQDLDSVIRSFEEEILQSS
PALAHPPAVSDSGESQPDLGFLLEASDDELGLPPTVSEVQTQNQPSIGNEGADNGLGNIV
GFENELPSYDSFEFGIGERVPDGNNYGGSGNGEFVTVDGLFDYSDGSDFGWRPEYLPAL*

>g46818.t1
MRLKIKPVQPSPSHPEVQHQENHGADQQVLKVEVMEDDGRGYEWLITDGNNPMISNPENN
NSDPPELSPTTPSDSQYLGKRKRKPKELIDEISPIVIRRKKKQPSASKSDPAISDDGRKY
LSKREKIADDGSGNPAQVKPPTMIRAEEVQSSLGNEYPSFVKLLVRSHVGSCFWMGLPVP
FCKRHLPRKDTTVVLENESGEQFEIKYISEKTGLSAGWRKFVAAHKLVEGDVLIFQLIGP
TTFKVLVIRANDLTEVDGALSLLNLDTLAKQSDAIVEGTADLKNKKKKRPKSLPLTVVQK
KKQKAGMPKSVLPHLGQLEEQSGNDSDEVASEVLEGSKFSADAVRFRDIKSFEDFHITVN
GVCIDSELPEHVRRKYYELCRSKNVFLHERFLPGLHCKLAAGMIFEAVSTADAIRACKVT
TSRKEFEKWEKSLRSFELLGMNVGFLRARLRRLLSLAFDADGALETKKYWEAKNERACTE
EEIRNLEAKLVELKESCEKHDAEIETLKPKAESFEIMFQEEVNAPW*

>g13525.t1
MWKLKIAEGKGPRLTSTNNHIGRQYWEFDPEAGTSEERAEVQRMQQEFKKNRFQRKQSAD
LLMRMQLKKENSHCPLVPQPIKVKEIEDITDEAVTTTLRRAINFYSTIQAHDGHWPAEFA
GPLFFSPLLVMALYITRTLDAVLSLEHRKEIIRYIYNHQNEDGGWGTHTEGHSTILGSVF
CYIALRLLGEAPDDGEDMARGRRWILDHGGAVATPTWGKFCLAEDLYSAHHLILDTLWGF
LYHFAEPILMRWPFSTLRKKALEKALEHVHYEDENSRYLGIVCLGKVLSMLACWAEDPNS
EAFKCHLARIPDYFWIAEDGLKVQCSGAQTWDAAFAIQAILCSNLVKEYGATLKKSHNFI
KTSQVKDNPSGNFSEMHRHISKGAWTLSAKDQGWQVSDCVAEGLKVSLLLAQMSSELAGD
KIETRRLYDAVNVILSMQSKNGGFPAWEPRRAYSWIEVFNPIEFLEGVLIEQEYVECTSS
AIQALALFHKLYPGHRKVEIESCISKAIKFIENEQGHDGSWSAC*

>g32818.t1.1.5bbdf93a
MPPPPPVGAGGTASIRPGSMAERARLAKLPQPETALKCPRCESTNTKFCYFNNYSLTQPR
HFCKTCRRYWTRGGALRNVPVGGGCRRNKRSKGSRSKSPMTSDNSTSTCAISSNTSCSND
VISHLPPPPQLPFFPPLHNLADFTNADIGMSFGTGIQPTIATRSGTGAEIEFPIGNITSA
GMGTGPLNLSARFADQWRLQQVQQFPFLGGLEQSPAAAAADGGGGVYQFEGEANDHPLGY
CGTITDQITSKTLEAGGSVKLEENQQGPSFSRNFLSGPGSDQYWSTTGNAWTDISGSTSS
ARHLM*

>g5632.t1.4.5bbdf934
MRIDEKRKAEEQDIIRLMRQKDHLEIEMSLLKQELELAKKTYEKNCSQLETQAMETKAES
ENKLIELQSLLNDSRKKVKELEAFSESKILRWRRKEHGYKHFMDSHVGSLQELRALSETI
KKEVLKTKKIYCEEIDHFGWELKGLIDAAQNYHAVLAENRKLYNEVQDLKGNIRVYCRIR
PFLPGQSEQQTTIEYIGENGDLVITNPSKQGKDSHRLFKFNKVFGPAATQEEVFLDTQPL
IRSVLDGYNVCIFAYGQTGSGKTYTMSGPSVSSVEDWGVNYRALNDLFHISQSRKSSITY
EIGVQMVEIYNEQVRDLLCNGSSQKRLGIWNTSQPNGLAVPDASMHSVQSTSDVLELMNI
GLMNRAVGATALNERSSRSHSVLTVHVHGTDLETNAFLRGCLHLIDLAGSERVHRSEATG
DRLREAQHINKSLSALGDVIFALAQKNSHVPYRNSKLTQVLQSSLGGQAKTIMFVQLNPD
VESYSETVSTLKFAERVSGVELGAARSNREGRGLRELMEQLASLKDTLAKKDEEIGRLRL
LKSNASGERHGIITQRYGSASPKRHSMGTSAQSQRLSAKSSPAKPASDLGNSSEYSDRHS
EAGSHHSLDDFKHHNDFFQQSMIAVAHGGQNFTEDTESKHVITDGIQNLTDDVELLGFGE
ADSEERLSDISDGVLSMGTETDGSINSIVEYTLFPEMAKPPAEDTEKPNLPTKLPRPQQK
LARTASSQLSSNKSTSKVASSKKATIGSSSTVKPSKRWQ*

>g26593.t1
MSELCLSSISKAHFSALIISNFFLFCSFILSHPLYFSCFIFFSPYLLKLLSYLSPLFITT
SLLLLAFLTVSPSFINDNFSKESSCSIAESKVSVLTALYRAVVERLRSKIDNQNEEFLRL
EDFEVFKLVFDNPTTDDAKGCQIEVLDTEVKDDSFQAFGCPVLARFGQQDFNLSTKEALA
SNLESDNFSESESNWSVMEEEKRLEGFFQELDEFENVKVTRSVENNKVGPPCTEANKAVE
KQGENTVVRNGSEAAGNKIRDTSVEEVGKDNGREYKSKLLKEHSHSIGASADHSNDNGDY
SLKIQSSPSLDYNLGSSGSMRKEKDWKRTLACKLFEERNNANGGEGMDLLWETHEMESIK
NKANSKSKKKKKNNKKKCEIKYREEEEEEIDDNGHNDEEDGSDAQLCCLQALKFSAGKMN
LGMGRPNLVKISKAIKGIGWLHNLSRHSKKVHNGDRF*

>g1908.t1
MATMMNSSVLACNYAISGMGSSDLSSKLVSVPSSVAAGQRLPVIRAQQIKVSESKESESQ
GRRAALLCLAAALFTTAASTSSANAGVIEEYLEKSKANKELNDKKRLATSGANFARAYTV
QFGTCKFPENFTGCQDLAKQKKVPFISDDLELECKGKDKFKCGSNVFWKW*

>g41675.t1.1.5bbdf93e
MSEQEEAEGREMEELMMQLCSPMDLDGDLYFRLPPRPQSPVLCLSPLWNFYGDNYSEYTG
GIHVMTSTANGLPPIDFPRSGPGDPLVSQSLAANCVTRYRPPLLQDPLYWVFLILSDLYS
VPMSLRTETLRKINYASNLDRFCKGIERWLGFCQNEIRKIWEGKRTKKEARYILSTIISM
TLNLFGTTINPTIMMVKLNSSKTFDLPHTHVVDENERNRLAEILKLMTVVSDTYKLPLAQ
TWVPTPVRQVVSCGQSLHASASFAEKLMKEAGLSASVLPSYFEDFNTWCFTTASTKHKLS
ERQGIVGRAYLFQKPYFCEDITQFQKTEYPLVNDARMFGLRSCLAVPICDNQTGKEIYIL
EFFLPHPLADLGQPQKVLDFLSAAINQSSPNLRMANKEFIKDGTIELIHFYVDMKPALSP
EYFQRQKTIKSSKYGYKNSSTFETIRCMHVPDMHSCEQPGNQEVDFIYRKTKIDEGERRI
PRKRRPLTLEDLKQHFGEKQQKAADCLGGSMVSVDGHPARERRQGDFPMSKLTKMNCSKV
LMEQFLVVPKFYIQILLVLGLKLTWESCQLRKPVLQ*

>g77091.t1.1.5bbdf933
MVSLQLPDYHVIIEHPMDFGTLRKKLDRGVYSNLEELEADVLLICSNAMQYNAPDTIYFR
QARSIQELAKRDFENLRNEGDNGEPQPKVVRRGRPPGKNLKKPPESSPIDHVGLELSPGA
TLASSEDKAIGSNGYNLRKGPMFYRFCSNDALGTSLGSCNGENYSDWLVDWNSEFPASIL
KADMKYGKKHFSVDENRRDTYKQFHNSRSGSDQSYSWNALGNMLRLMAVGLHLEPHAYAQ
SLARYAANLGPITRNVASSKLKSALPDARAFGPGWIEENDTPQQPLSFSAEKLKPTNGLV
RDRDSSRQVTPFTSGLSSVVRMPSAEMIEAIRRLNFQNELVEQAGGSLSTTTGNSFQAQH
KSVLQPNRNGFNARFGFDLSTRIARQAIQAGQSALEDGLISNKMLGMLSNGDVSSPHPGP
SFQASSGEIKLSEGLGTSYGDVLGQASDLHMVSEVGIAGRPSPQVSSAQHRQPIAVPPDL
NVRVQASGSASSSLQFGLPQQQQPDLALQL*

>g35343.t1.3.5bbdf933
MILRRQEQNVDVQKFCLRLSHSYKLLDLTPYITKLMKALTASKIKELVFKVGTFEGRSWY
TFPEAVYACSSLNKLELGGFKLKRPSDDIIKLSSLCELHLYKTHVNDQLFQLLIMSCPEL
EFLSVDHCFGFDRLQILGLPKLKQITMYNCHRQFDKIEIQAPNLEYLSCHGLGRLSVVDV
TSCKSLKILVLYSLTCNSKWVEDIFSNLPFLEVFRLIDCEGLELVKISSNHLKILELDSC
KGLVKTEVDAPNLSEFHYCGSFLVGLSLEALAKEFIFLDIEHRKHKDILHNEFMEFLQNF
NHSKVIKLITGQPAELFLPTELRQNLRPPLYDVKHLTIIPYDGVNKSMILDLLDSLLWIA
PCLDTLALDLSCSEKIVKVWNDLWMHGLSTYV*

>g62022.t1
MLVSFRGSPPTTMDSLLKAPHGFFSMICEEDFDLGSSCIQRTLIEMFNLLLVFVFFLVLI
IGLARKIDIRLRRREWITTVTSIGCALISISYFCACLLNLSGKHGEFNHLSWLAYLVRGL
IWVTLCLSLLVQGSRRIKFLISTWWMVFFLLISALNIEVIVKLHNIQILEVGAWLVNFLL
LFCAFRTFHHAIFHPDLEKSNLSKPFLVKEVHDENCIDLGQATFFSKLSFSWINPLLRIG
NSKTLALEDIPSIGLEDEANLAYEKFAHAWSLLQKGKGSNNAQNLAFWAIAKVYWKEMVL
IATYALLRVVSVVLAPLLLFAFVKYYNHKAKRIDEGLVLVGILILVKVVESLSYRHFFFY
ARRIGMRIRSALMVAAYQKQLKLSSLGRRRHSTGEVVNYIAVDAYRMGEFPMWLHIGWTS
GLQLFLAIIVLFAVVGLGVLPGLIPLLICGLLNVPFAKILQKCQSEFMNAQDQRLRAMSE
ILNSMKIIKLQSWEEKFKNLIESYREIEFKWLAESQYKKTYNTVLYWMCPTIVSSVIFFG
CILFRSAPLDASTIFTVLAALRSMSEPVRLIPEALSCVIQVKVSFDRINTFLQEDEIKHE
DSIRYPLGESDLSIHIQAGNFSWDPDSTTLTIKNVNLKVRRGEKVAVCGPVGAGKSSVLY
AILGEIPKMSGSVNICGSIAYVSQASWIQSGTVRDNILFGKSMNKIKYDEAIRVSALEKD
IESFDYGDLTEIGQRGINMSGGQKQRIQLARAVYDDADIYLLDDPFSAVDAHTAATLFND
CVMSALANKTVILVTHQIEFLSEVDHILVMEAGHVTQSGSYEELLTAGTAFEQLVVAHRK
SLTLSDPLTSKNEVEPQRGNGNDLEGTKQPYFNKETSEGEISTMPGVQLTEEEEKEIGDI
GFKPFLDYVFISKGLVHAVCNLLTQTGFVVLQAAASYWLALSIQSPKISNIVIISVYTAI
STISAFFVYLRSLFAALLGLRASEAFFSGFTNSIFNAPMLFFDSTPVGRILTRASSDLSV
LDFDIPFAYAFVMAAAIELVATIGIMASVTWPVLIVGIFATAASKYVQGYYQPSARELMR
INGTTKAPIMNYASETALGVATIRAFNMSERFFLNYLKLVDADAKVFLLSNAAMEWLVLR
TETLQNLTLFAAAFLLVFLPRGYIAPGLVGLSLSYAFALTGTQVFLSRWYSSLVNYIISV
ERIKQFMHIPPEPPAVVEDNRPPSSWPFRGRIELLDLKIRYRPNAPIVLKGITCTFREGT
RVGVVGRTGSGKTTLISALFRLVDPYRGQIIVDGIDICSIGLKDLRLKLSIIPQEPTLFR
GSIRTNLDPLGIYSDEEIWKALEKCQLKGTVSRLPNLLDSSVSDEGENWSMGQRQLFCLG
RVLLRRNRILVLDEATASIDSATDSILQKVIREEFSNCTVITVAHRVPTVIDSDMVMVLS
FGKLVEYDEPSKLMETNSSFSKLVAEYWSSCRKNSLQKLDHYGF*

>g32387.t1.1.5bbdf934
MFKGGPGSGKGTQCARIVENFGFTHLSAGDLLRQEISSNSENGAMILNTIKDGKIVPSEV
TVKLIQKAIQSSENDKFLIDGFPRSEKNRLTYERIIGAGPNIVLFFDCPQEEMVKRVLNC
GQGRVDDNENTVKERLKVFTALSLPVVNYYAKEGKLYKIDATGTKDEIFERVCAVFAT*

>g34471.t1
MATNSEKKNKHTDAAMRAKKQSFKKRKYCILKKSMELSVLCGIKVCAVVVDPDGKVETWP
ENRDDVMEIVKLYYQNFSDDGSKVGPEKKKVDLDHNLDHHDHDRHQVVLDVQQRELDEAE
SWIEGLSDTPVNEFLTEINAKMNAVGSKMDILRRTSTTMVDNDDDGGQINDHSTMAGALV
VSCDDEKAMEDYSTFLDTKMIDDQTDDIIMPAAVVVCEGEEVMEHSIFKDQNQSQIHHTF
HYVDDEQNFDYWFDKQFTWNRPRGFVMKGGKSKAKADTKLSVKKGAAAGKKPVKKGKAAK
DPNKPKRPASAFFVFMEEFRKQYKEKHPNNKSVAAEKAPYIAKADKRKVEYEKNLQAYNK
KMADGTGAEDEESDKSKSEVNDDEDDEEEGSGEEDDDDDE*

>g41042.t1.3.5bbdf93b
MPPYLSRCKPKMEGAGEMGMIGENFGSGATERVREEENESRSGSDNIEGGSGDDQDTSGD
KSSSRRKKYHRHTPLQIQELEAAFKENPHPDEKVRLELGRRLNLESKQVKFWFQNRRTQM
KTQMERHENSILKQENDKLRIENIALKEAMRNPVCSNCGGPAALGELSVEEHHLRIENAR
LRDELNRICVVTNKFLGRPLSSLASSMPPGNSDLELAVGRNGFGSLSSVGAPSPMGLDFG
SVISSAMPVLPTARSSLGMTTFDPSIDKSMYLGLAMAAMDELLKLAEIDNPLWFRNLSGC
GEALNLEEYTRVFPPCIGMKPSNFITEATRATGTVNINSMSLVEILMDLDRWTEIFSCIV
GRTFTIDVVSGGMGGTRNGALQLMNAEFQVLSPLVPVRQVKFLRFCKQHAEGVWAVVDVS
FDSLREGLNAQSCGGCRRLPSGCIVQDMPDNGSKVIWVEHMEYDDSNVHQFCRPLLRSGL
GFGAQRWVATLERQCEYLATIMSSTVPGGDHAVISPSGRMSLANLAQRMTRNFCAGVCGT
VHKWEIVQAGSTDDVRLMMRNSIGNPGEPPGVVLSAATTVWMPVSQQRLFDFLRNEQTRS
QWDVLSNNGTMQQMLHIAKGLDLGNSISLIRSSGTSQNSNQSSMMILQETCTDVSGSLIV
YAAVDIPAINVVMSGGDSSCVVLLPSGFAILPDCYPDSTGTSSSTGTLAKEAAVGGGCNG
SLLTVGFQIFVNSLPAAKLTMESVDTVNTLIGRTLEGIKSALHCT*

>g14555.t1.1.5bbdf933
MSCSPSSSSASEDEDEGMDSYRKGGYHAVRVGDSFAGGRYIAQRKLGWGQFSTVWLAYDT
RSSRYVALKIQKSAPQFAQAALHEIEILSAIADGDASNSKYVIRLVDHCKHAGPNGQHLC
MVLEFLGDSLLRLIKYNRYKGLELNQVREICKCILTGLDYLHRELRLIHTDLKPENILLC
STINPSKDPIKSGMTPILERPEGNLNGGAAVNLIEKKLKQRARRAVARISERRSSMGGIR
ANPKPDRSLDGIDVRCKVVDFGNACWADKQFADEIQTRQYRAPEVILRSGYSFSADMWSF
ACIAFELATGEMLFTPKEGQGFSDDEDHLALMMELLGKMPRKVRTYIASSLLSENH*

>g45361.t1.2.5bbdf93a
MPLSTSPTAPALPFLFPSHSKLKKGFNQKRFSVKKCINVCSGGISFYKNSRNADFSTSSS
SGESSTPVGSDVQFPKDYSELLQQAKEATELALKDNSQLMEIEFPTAGLGSVPGDGEGGI
EMTESMQLIREFCDLFITPEKATRTRIFFPEANEVQFARNSVFEGASLKLDYLTKPSFFE
DFGFATKVKMVDRVKPEDELFLVAYPYFNVNEMLVVEELYKEAVINTARKLIIFNGELDR
IRSGCILGYKCYLLVM*

>g500.t1
MKQIAKEVDGLIKELINARQKGMRTGEASDDDLLGILLESNSQEIDKKLGMTTREIIDEC
KLFYFAGQETTAVLLVWTMILLSIHPDWQARAREEVLQHFGTNIPNFDGLNHLKVVTMIL
HEVLRLYPPFPILARATAEETKLGNLTLQSGQLLTIPTMLLHNDPEIWGDDVKEFKPERF
AEGVSKATKGQVVYFPFGWGPRICIGQNFAMLEAKLALAMTLQRFSFELSPSYSHAPYST
VTVQPLHGAHLILHKI*

>g11184.t1
MERHKFEAAKKVLKSGQLRNFRQLGIDKLKETEPIIRACYDKHWEHDFETLAWMLAIDSL
YLINFLKYYPSLPSCKGKDGDPDLRKLIQDLLMFENQIPVYVLKEVRNALGECFDDRDLI
LLDQLLTVCKAHSPLELNEQMKIVFDDSTTTCVHILSYLHNLIVQNRGIKQAQNQEGRLV
PYMRTSEFRMGTNEIKEVVEVAAGTFGGPVASAVLSFVEKVPWQRISAFFGQDQNEGDPN
EREIRIPSVTQLSETAKIKYNRSNGGIRDVKFEEEGEERTFHLPVIRLHADTEVILRNLV
ACEVATTTPGKTLEFAEYVDLMCGIIDTPKDVQLLRKAHIVEGSLGDEEIAALFNRIPKT
TGNGSIPSENKSSVARAVDQANQIYDNKPTIKLCLLCKHFARFMAAVLVGLAKVKVRDHV
FL*

>g55037.t1
MSTTAGHNQNRRFTSSTTSSAAKRSSSYSSENVGKAVNSGLPPQQQHLAKKRPALANVTN
QRPQGRNTLSESAKIVPCTAKIVSIKKGAPSSIGSGGFSGSTLPASSFLKPNIVASSKNI
YPQRSDATLPKILAPAPSGMDISPADSDGLSVSMDESMSTCDSLKSPDIEYLDSNEIAAV
DSIEKKTSTKLCISDYAETPGIMCKRDVLSEMVSDDDIIDVDNNLMDPQSCATIACDIYK
HLRASEVKKRPSTDFMERVQKDINASMRAILIDWLVEVAEEYRLVPETLYLTVNYIDRYL
SGNAMDRQRLQLLGVACMMIASKYEEICAPQVEEFCYITDNTYFKDEVLEMESAVLNYLK
FEMTAPTIKCFLRRFVRAAQGLVVNEQAQSLQLECLANYIAELSLLEYTMLCHAPSIVAA
STIFLAKYILVPSKRPWNSTLRHYTLYQPSDLHDCVMALHSLCSSSYNSSLPAIREKYSQ
HKYKFVAKKYCPPSIPQEFFQDVSS*

>g74705.t1
MSSCANCYWHTSNFREKLRQEGYGTVYKGKLSNDVFVALKVLKNTIEEEEDFINELGIIG
RIHHINVVRLVGYCADGFRRVLVTTTYQITPMRSSPLQRMTEICSDWKSCITLPWA*

>g35068.t1.2.5bbdf934
MGKSLVKPLTSITRSSLHNLTSHSFSTNSLTAEFTSLCSKGHIKEAFTNFNSLLWSDPRL
FSHLLKSCIETHSFFLAKQLHSLILTTGYFRDKFVLNHLLNAYAKLGHLDNAVSLFDQMP
KRNTMSFNILIGGFIQNGDLDSAFKLFDEMDERNLATWNAMIVGTIQFEFNEDGLSLFSK
MHKLGFLPDVFTLGSVLRGCAGLKDLTKGKQVHGYVVKSGFEMNLIVGSSLAHTYMRSGS
LKEGEKVIRLMPVHSVAALNTLIAGRAQNGCSEGALDIYNIMKMAGFRPDKITFVSVISS
CSELSTLAQGQQIHADVIKLGALSVVPVISSLVSMYSRSGCLDDAVKIFEERQGADMVLW
SSIIAAYGFHGRGKEAIELFDRMEQEGLEPNEVTFLSLLYACSHCGLKDKGLELFKLMVE
KYGLKPRLEHYTCVVDLLGRSGRLDEAEGYIRSMPFKADAVIWKTLLSACKIHKDSDMAK
RIGEEVLRIDPQDSSSYVLLANIQASAKRWKDVSEVRKAMRNMNVKKEPGISWLEIKNQV
HQFIMGDKSHPQAEEIDNYLNELMEEIRIEGYVPDIGSVLHDMDVEEKEYNLVRHSEKLA
IAFALMNTPEGFPIRVMKNLRVCSDCHVAIKYVSKVKNREIIVRDASRFHHFKNGYCSCG
DYW*

>g39023.t1
MGFLKVVVSLIFCLFMSTLKFTSSDSFLTKEGLAEIPTKFLNMAKRQQLLDWMVNIRRTL
HETPELGFEEFETSKLIRTELDKMGIPYKHPVAVTGVVGYIGTGKPPFVAIRADMDALAI
QEGVEWEHKSKIPGKMHACGHDAHVAMLLGAAKMLQEHRNELQGTVVLVFQPAEEGGGGA
KKMLDTGILENVDAIFGLHVSARFPIGTVATRPGPILAASGFFDAVINGKGGHAAIPQSS
IDPILAASNIIVSLQHLISREADPLDSQVVSIGKFQGGAAFNVIPDTVTIGGTFRAFSKD
SFMQLRQRIEEVIIKQAAVQRCNATVDFHGDDRPFYPVTVNNKDLHNHFQNVAEQMLGAK
NIIEMKPLMGSEDFSFFAEAVPGYFYYVGMQNETEGKLESGHSPYFKVNEDVLQYGAALH
ASLATTYLLDGRPKVSMREDSLHDEL*

>g10439.t1.2.5bbdf93c
MSVPDAAVGFLLENLKQILVYNVNLIADVRENIVLLCNELEILKGFVREYTEMNSNTEAL
KALRKEIRSVVSEAEDAIDTYIVHSAVQKARNWIEKVFKIGDYGKKLRSLGKQIEEVGER
VKAIYENRAAARTEAMQIANKREKKKQAPVVEEDNVIGFDGAAKEVIELLTGGSEELEVV
SIVGMLGLGKTTLAKKVLNDPKIEYEFFTRKFIYISQDFDRREVFLDILSSFDQLTEEVN
KMPEDDLAKHLREQLKTRKYLIVIDDVWEKEDWDKLKVAFPGNKRRSRVLITTRNTYVAT
YANPTSKPYRLKFLTFEAGRELIRRKVFGENKCPKQLQKHEIHIVKKCNGLPLAIVVIAG
ILMNNRHVTDWWKRVADSVNDYIARDQERSKDVIILSYNHLPYHLKPCFLYLGVFREDFE
IPVWKLLRLWIAEGFIPQEGDLNLEDIAEEYLEELVVRNLVMVGKRRSNGQIKSCRIHDT
LREFCKKVGMEENLFQEIKKDNLTFFLSKHPTLDVCRRLYINANVLDYISKKPSADRVRS
FLTFAKEETTLIAEHVPLIPRAFKLLRVLEVKSLSFTRFPTDLCQLVLLKYICISCTFKI
LPPAMSTLWSLQTLIIDTTSRTLEIKSDIWQMPQLRHLRTNASTSLPCPGTHNGNEEALV
SANLQTLSSISPESCTKELFERTPKLRKLAICGRLAMLFEVNGESKLFDYLCKLEVLENL
KLLNDDVSSPLSRLPQENNFPVNLTKLTLSKTYLPWTQMSILGKLENLEILKLKDNAFQG
DWWQTETEGFKSLRVLHIGSTDLTIWDAAAEHLPILKCLVLRHCTKLEAVPHSLADIPTL
QKIDLHCTNHLVASSARKIYVLKLEQAQQTGTKSNGFKLFVYPPDQ*

>g14608.t1
MILNRCTSIFVQSKLPRTMCFASGTNTGRLRQQLDNIHKEAESTRAEANSARLGFLRLSE
AAEKLRQQAALGVRTGKENDARELRFQKRKVMQAMEKSKNRIEMLDELATKLTEVISEKE
TELIGNVASDLEVGKDAALTTVRFVSPKEEVPYISAEVNDFDEKEKLDQNKGLEIGAQSL
TKLHSENVLNDSEQSVDGDVSKEDDAVQISSYEDFLKHIDSQLHNIEVEILTLLKSSQSI
LKSRENLQCSNFQRVVEILENVLRNRERIGSIRRTGVGIR*

>g43628.t1
MLILDLSMNALTGFFPPEIGKLKALISMNLSRNQFFGEIHSAIGELQSLQELSLAHNKLQ
GLIPESMKNMFSLQYLDISFNGLAGVIPNSLEVLSSLKYFNVSYNKLRGQIPKGGPFKNF
TKLSFLSNEALCGAPWFQPCQTSKNRSEAKRLVFIILFGMGSTIVALIISLFLMRKLRRK
VMTPAHDLLPMRTCERVSFDELKQITDGFNERSLLGTRMFGSVYKGIHENGMTWAIKVFD
LQLEGAFKCFDRECEALRCLRHRNLTKVITACSNLDFKALVLEYMPNGSLEKWLYLENHF
LSIAQRLDIMINVACGLEYLHNGYSVPVVHCDLKPSNILLDNDMVGHVSDFGIAKLLGDG
KSEVQTKTLATFGYIAPGEVSGCATLVAGAGDVSDLCDGAEVAWWLQGVVVCRAWGSNGY
GINGDDVGNGTTGGNGKNGGLGSTGVVFVILWVVILRLILGGFVFRF*

>g54238.t1
MANLYLKQGKHYSESRPNYPDEMFQFIASKTPHHDLAWDAGTGSGQAASSLAKIYKNVIA
TDASQKQLEFAPKLPNVRYQCTSPIISAEELERNVAKQATVDLVTAGQAMHWFDDLPTFY
RHVKYVLKKPGGVIAAWCYTVPQVNARVDAVFTKFFMVDSRPYWQPGKHLIYDKYESIGF
PFFPVDGAEHTGPFEFMTEKLMNLDSLLLYGKSGSAYQTALEKGVDLLNEDLIEEFKSAW
NEDVNNQKVVKFPVYLRIGKVGN*

>g55004.t1
MAQAARLSLRMQKELTLLLTDPPPGASFPSLSAPQTSSSSSSGPSLSSIDAQIEGPEGTV
YAKGIFKLKVQIPDRYPFQPPIVTFATPIYHPNIDNGGRICLDILNLPPKGAWQPSLNIS
TVLTSIGLLLSEPNPDDGLMHEASQEYKYNRQAFDQKARSMTEKYARSGATEIAGGGQGC
ETLQKPSIQLAEAKESGTSMREFNDYQVSHKRLRGISRKLSLESTELDQKRNAAKGANDV
PGNHLYQRQMEHIGLKQESKGMPSEHNQIHEDLQATRNELSFEPSHIFEVKNNEDMFDLL
SNQCSTTSKPQSLVDSLKSSPLLQSGFNSLQKPNQGGDGRPKCNILDTKLEKEELLESLD
SNLETVDFDKKQLSPAQQPFTQSQSQSSRSHRNFSLPQTISHNWTKPHSGIVDGDGSSFT
RIKHKKLGLAGRTFSLGNSGSYQYLLKDNTENLAPNSSFPLAHSCKNPIPSSGLSMASEV
CHSRESSAQNHPTHLSHNSSWTVHRQPVKPFGQLSNRSNVTTQCELQPLNPSKMSSEQHD
SCSHENQQSKQDCRGKVVEIKKLEGTSPSGDLNAVIVLDSDDSDEEQGRTARSKLSLARR
RLPGKLKF*

>g14417.t1
MVVLLFQQVVVFDNKSTSVDESELLMEENNSDENESGAAFLIRILRYLETPQYLRKSLFP
KHNSLRFVGLLPPLDAPHHLRKHEWAPYREGVTLQNQAPDSPGMLVDVGLNKNVVIDQVT
EPGRRVTVAMGSNRNLDTSLTYQVVPSSRPRDDRGMYWGYKVRYASNISAILSGCPHKGG
YDYLIGTSEHGVIIKSSELSLPSFRHLLIAFGGLAGLEECVEEDVNLKGKNVRELFDLYL
NTCPHQGSRTIRTEEAIFISLQYFQEPISLLLQRGGQKDLVG*

>g29671.t1
MIKCLSLSIHAVPFKRRLSFLNTLSITRPTQKAAADSASSHLTHQFISSGLKISAKSNLF
RQGKQLHGQIIKLGYQYMLPLQNLLLNFYLKCKYVTNARQLFDEMIVRNVITWNTMICGL
ADKFSDFESNFDLGFGYFGRMLMGNVRPDWITFRGLFRLSVDMGDIEMSNVLHCFVMKLG
FCDDLFLSSALVDMYGKLRLVEEARRAFDHLVHKDLVLWNSLVSCYAFNHLPGEALRLYN
LMRLEGFMGDEFTFTSLLNSCAGFGFCQIGRGIHGIVVKLNFDLDVLVASSLVDMYAKNE
NLHDAHKAFDMMIFKNVVSWNTMIVGYGQYGNGIQAMKLLNKMIQKDFHPDELTLASVLI
SCADIATVGEITQVHAYTLKIGFSSFTSVANAMISAYSKCGSIICALQTFRSILEPDLVS
WTSIIGAYGSHGFPNEAIELFEKMLSNGVKPDRISFLEILSSCGHSGLINEGLRYFTLMI
NVYKIVPDPEHYACLVDLLGKAGLLKEAFDFLTSMPVEPGSDAMGAFLGACKVHGDLRLA
KWAVEKLFALEPKNSVNYILMSNMYASNGAWLDVANIRRLMREKCYTKAPGCSWMEIAGK
IYSFVSGDNSHPQAIKVYSLLGLLYELMKVDDHELVENFR*

>g4869.t1.2.5bbdf93a
MDDALQSPEHLQRLYSEVHLLRTLKHENIMKLYASWVDYENKKINMITELFTSGSLRQYR
KKHKNVELKAIKNWARQILQGLYHLHNHNPPIIHRDLKCDNIFVNGNHGEVKIGDLGLAT
MLQQPTARSVIGTPEFMAPELYEEEYNQLVDIYSFGMCLLELITCEYPYSECKNQAQIYK
KVTSGIKPAALGNVKDPQAKQLIEKCLLPACWRLNAAELLKDPFLSSESSKELLCYPLQP
LNVTSKSVDFLKADSLSMDIEPTCKKLSCDTSGESTTETHTGELRRYNGRNEFRLRGKNH
DDCSISLTLRIADVHGPVRNIHFIFYLVTDTAISIAGEMVEQLGLSGDDVFLIAELIDSL
ILDIVPSWKPSFESVTGVSDLNECGILQNGKLSKSCDGEHESNTMPCCGIIEPHSFSEFI
FVEKHDAEESVEKSSQLDDNYLRSFDFSIVEWTKGSKKYAADFYDGSISESVMSESTKKS
GLSYVGSISAISNDMCLSFSSASLNDKDREKDQCNELNLELNAIAMQYDQCCHELLRMRE
EAMENAKKRWTARKKMPVS*

>g21232.t1
METPDYSPTHADASRPSLGFPLGTALLLIVIFSLSGVFSCCYHWDKLQSLRRSFFPSTDL
EPDSDQDPSKAKLAPMVSKKHYWNIPYIWC*

>g23077.t1
MQQPVWKDQDTTFKELTAETALEALDLNVSKQLMRIHIQNLLCICNPKERKIIRLKFALK
MANRNHYLNWCSFLIV*

>g12019.t1
MQAALLTSPTTPAPSSFKTHIPKSNLPPKRVLKFTIKSSTTQTAPPPPPPQTTTISEKLN
KYSSRITEPKSQGGSQAVLYGVGLSDDDLHKPQIGISSVWYEGNTCNMHLLKLAEAVKEG
VKEAGMVGFRFNTIGVSDAISMGTRGMCYSLQSRDLIADSIETVMAAQWYDGNISIPGCD
KNMPGTIMAMGRLNRPSIMVYGGTIKPGHFQGHTYDIVSAFQVYGEYVSGSVSDEHRMNV
VRNSCPGAGACGGMYTANTMASAIETMGMSLPYSSSTPAEDPLKLDECRLAGKYLLDLIK
MDLKPQDIITPKSLYNAMVMVMALGGSTNAVLHLIAIARSVGLQLTLDDFQRVSDKVPFL
ADLKPSGKYVMEDVHKIGGTPAIIGYLLELGFLDGDCITVTGKTLAENAKLFPSLSEGQK
IIRPLSNPIKETGHIQILYGNLAPEGSVAKITGKEGLYFSGPALVFEGEESMLQAISENP
ASFKGKVVVIRGEGPKGGPGMPEMLTPTSAIMGAGLGKDVALLTDGRFSGGSHGYVVGHI
CPEAQEGGPIGLVENGDIITIDIQKRRMDVHLTDTELDERRKTWNPPAYKADRGVLYKYI
KNVQSASKGCVTDE*

>g60297.t1
MSMSVSDFRSLLFSLPPVSQGRCGGLSGDLSFNPRFLLSTPGIGISHERCSPNDLSFSPP
VKPPILTSSISFPGLQSVPSGKTDVARSVLLILSIRQFAF*

>g41097.t1
MDILEQSYKHLPDDLKACFLYLGIFKEDKEVPVSRLMWLWMAEGFIQEKDSKSLKGLAQE
YLMDLIGRSLVIATKRRSNGEVKACRVHDMVRSLCLLKAKQEKFLELVTSNDEPYASFDD
SIESDDFDPPSAMKYEGHRLCIWASRKHYVVSRPSGQYVRFLLFFATSDTYPRCPYDVSF
ISKNFELLKVLDLQCINMGSTFADGIDLLVQFSYLAVGGDIDSSPSSLVKLRNETFLV*

>g66093.t1
MELVKDHAPKNSTLCLIQPHPYYEYDQFGEPTDNASPGLYRIEEGSSSEKSTGIAKNFAV
TSPSSLSSPSSSNSDGLGYQQALNCLPEDGHSVINFKGGFGNFANAGGSLLSFDHSHNSF
PRITSDNKDDYSVWGDNLNYNYQNQLNNSRCSTSIPQLLENSNNIQSSSSYASTDNGVPV
GWLSQEVNTNASINNSIQDLGKQEACLSAKRHYLEEKVHALKKQCTSVTKTTLKSKSSPS
KDPQSIAAKNRRERISERLKILQDLVPNGSKVDLVTMLEKAISYVKFLQLQVKVLATDEF
WPAQGAKAPDLSQVKEAIDAILASQRDRNSSSSK*

>g62074.t1
MLCGLLLNQEDGFLADNFVIPDVLKVCGALKFVNFGDARKVIDGMIQKNVVAWNSIIVSY
VQNGLNQKAIEVFYDMQVEGIKPTRVTVSGFLSASANLCAVEEGKQGHATAILSGLEPDS
ILGSSVLKFYAKVRLFEDAELVFDWMVEKDVVTSNLLISSYVRYGLAENAGLVKRGIVIV
VVVVGVATCIVDMYAKCQRIEDARQIFESTAKKGLILWNVVLVAYAEQGLSGEALKLFYQ
MHLESVPPNMVSWNSIILGFLINGQVNEAIDMFSQMLASYVQPNLVTYNLD*

>g74824.t1.2.5bbdf93a
METNVSNSDSQCLEIAMEVHKVVPPPHISTFKKLKNRLKETFFPDDPLRQFKGKSSKTKF
ILAAQYIFPILQWGPNYNFKLLKSDVVSGLTIASLAIPQGISYAQLANLPPIVGLYSSFV
PPLIYAVLGSSRDLAVGPVSIASLIMGSMLRQEISPAQDPMLFLQLAFTSTFFAGLVQAS
LGILRLGFIIDFLSKATLIGFMAGAAIIVSLQQLKALLGITHFTKQMGLVPVLSSVFHKT
NEWSWQTILMGVCFLVFLLLTRHISIKKPRLFWVSAGAPLVSVILATLVVFASKAQHHGI
SIIGKLQEGLNPPSWNMLHFHGSHLGLVMKTGLMTGIISLTEGIAVGRTFAALKNYQVDG
NKEMIAIGLMNIVGSSTSCYVTTGAFSRSAVNHNAGCKTAASNIIMAITVMVTLLFLMPL
FQYTPNVVLGAIIVTAVVGLIDVPAAYQIWKIDKFDFIVLLCAFFGVLFVSVQGGLAIAV
GISIFKVLLQITRPKTVVLGNIPGTDIYRDLHQYKDAIEVPGFLILSIEAPINFANTTYL
KERISRWIEDYEAEEEENKKQSGLRFLLIDLSGKHH*

>g49949.t1
MMSFHRLGGLFKLSHLCELKISGDLEILPPHLPPNLSHLSLTLMRLTEEQMPILEKLGRL
SFLKLKRANFGGKITISRNGFHQLKFLELQKMNSLQEVKVEKGALPQLRCLRIRGCGELQ
MLPEELTNMTAPEN*

>g47185.t1
MAGKAAVKSVVKSVGEYQYPWREKLAKYKNELSKGVWGYWELGAWKPLGISARRRARLRK
EVLLAGEDWNYDPERKGMRTKRKGHKCDRIAAEKRENTAALMQKMPAMLADYRKRRWERK
MKAEDDAARKAVQE*

>g70716.t1.1.5bbdf937
MVEPSFARRSLISHVEYLPNAHVITTAAVDLTDNEVLTAEGRMIAYEYLVIATGHMDDGP
CTKTEKLSYYQAEHEKIKSANSILIVGGGPTGVELAGEIAVDFPDKKVTLVHRGSRLLEF
IGEKAGKKALDWLISKNVEVILGQSVNLNDASDGVYRTSAGENIKADCHFLCIGKPIASS
WLKNTILGESVDVDGKLMVDTNLRVKGHKNVFGIGDITDIAELKQGYLAEQHALVAAKNV
RLLIRGVNENRLATYSPASAAMAIVSLGRRDAVAQIFCITMAGRLPGMIKSGDLFVGKTR
KQLGLKP*

>g18067.t1
MRTGSNGNLNSPGNGGGVLKGRGRVRAESVIEAASLAAKGQPFEVVYYPRASTPEFFVKA
SSVSSAMRVQWCAGMRFKMPFETEDSSRISWFMGTIASVQVSDPIRWPNSPWRLLQVTWD
EPDLLQNVKRVSPWLVELVSNMPVIHLSPFSPARKKLRLPQHSDFSLDGQFPVPSFSGNP
LGPSSPLCCLSDNIPAGIQGARHAQLGVPLADLHHGNKMHLGLLSPSFHRLDPSAKISGG
IIRGQLDSNDDVSCLLTMGNSSQKLEKTTSIKTPRFLLFGQPILTEQQMSHGCVSDAISQ
MGKSSTFGMSSKADRFSLDQKVHVDNLANTGFFNQGCHAAELGLDAGHCKVFLESEDVGR
TLDLSVLGSYEELYKKLTSMFAIERSEIEGHVFYRDATGALKQIGDEPFSAFVKTAKRLK
IFTNSGNSSVGRKWFTGLPTAERGLDSSNQTGPLSIFA*

>g38131.t1.1.5bbdf935
MDARFHNLGFAANPALNGFKNLGNSFQIGAAGGGYCADTTLRLHSSGSPIPFVSALKGIK
RKWSLIDSSVGQQLESSLCLRLGHSTSSSDSKGSSATACTSVSSAKEIEESSMELELDFS
LHLGNDKTSSPRKSTSPSPKPVHVWPKVDLELSLSSGTAESDVTSIHPSSTLPQNVVNQM
PVAVGEAFYTEEGSISSSKMGSLFHPLQTADNMQTSYFLNKAVRELKPAATTSEISTSII
TTPKSSVTCSSGITQQQQQRSTSTKQCQFNGCVKGARGASGLCIAHGGGRRCQRPGCHKG
AEGRTAFCKAHGGGRRCEFLGCTKSAEGRTDLCIAHGGGRRCSHEGCSRAARGKSGLCIR
HGGGKRCQKENCTKSAEGLSGLCISHGGGRRCQYPECTKGAQGSTMFCKAHGGGKRCTFE
GCTKGAEGSTPFCKGHGGGKRCSFQGGGICPKSVHGGTLFCVAHGGGKRCAVPECTKSAR
GRTDFCVRHGGGKRCKFEGCGKSAQGSTDFCKAHGGGKRCSWGQSGSEFGNGENPCNSFV
RGKTGLCASHSALIQDKRVHGGATLGAMVQDSEESSKPEKMKQVIVTEDTNADIMKMESN
NITSFSGSGWKYVDPLQAALPVRRSASSNAVAVSEGRVHGGSLMAMMVGNFALSFSSSSD
VVGPSEQGKSSIHQNWL*

>g3688.t1
MSKEYTAGGKDNNNTAGYTSMPQRQRTLGEITLEEFLVRAGVVREDAQLAGKPNNTGILG
DLSRIANNQALGFGYQQPGRNTGVVGGRVLESSNQMAMESANLPLNVNGVRSTQQQLGAT
QTQQTQQLPQQQQQQHLLPKQPALAYGAPMAIPSNAQLGSPGVRGVIVGMSDPVTNADMV
QNGALQGAGTGMVNLGAGAVTVAAVSPAVSSDGLAKSNGDASSISPVPYMFNGGLRGRKC
SALEKVVERRQRRMIKNRESAARSRARKQAYTMELEAEVAKLKEENQELKKKQAELMEIQ
KNQVMEMMNLQRGSKRRCLRRTQTGPW*

>g9437.t1.1.5bbdf93c
MSSSRPSQSSSSSARSKHSARIIAQTSIDAKLHADFEESGSSFDYSSTVRVSNVPGGDDK
PRSDRVTTAYLHQIQKGKFIQPFGCLLALDERTFKVIAYSENAPEMLTMVSHAVPSVGDH
PVIGIGTDIRTIFTNPSAAALHKALGFGEVSLLNPILVHCKTSGKPFYAIVHRVTGSLIV
DFEPVKPYEVPMTAAGALQSYKLAAKAITRLQSLPSGSLDRLCDTMVQEVSELTGYDRVM
TYKFHDDDHGEVIAEVTKPGLEPYVGLHYPATDIPQAARFLFMKNKVRMICDCRAKHVKV
IQDEKLPFDLTLCGSTLRAPHTCHLQYMENMNSIASLVMAVVINEGDDEANASDSAEPQK
RKRLWGLVVCHNTTPRFVPFPLRYACEFLAQVFAIHVNKELELENQIVEKNILKTQTLLC
DMLLRDAPLGIVSQSPNIMDLVKCDGAALLYKNNIHRMGLTPTDFQLHDIVSWLSEYHMD
STGLSTDSLYDAGLPGALALGDPVCGMAAVRISDKDWLFWFRSHTAAEIRWGGAKHEPGE
KDDGRKMHPRSSFKAFLEVVKTRSLPWKDYEMDAIHSLQLILRNASKEDETTKSDTQAIH
TKLTDLRIDGLQELEAVTSEMVRLIETASVPILAVDVDGVVNGWNTKIADLTGLPVDEAI
GRQLLTLVEDSSAEAVNKMLELALLGKEEQNVQFEIRTHGSKKDAGLVSLVVNACASRDV
RGSVVGVCFVAQDITGQKNIMDKFTRIEGDYRAIIQNPNPLIPPIFGTDEFGWCSEWNSA
MMKISGWRREEVIDKMLLGEVFGIHTACCRLRNQEVFVNLGILLNNAVTGQESEKTPFGF
FARNGKYIECLLCVSKKLDREGAVTGVFCFLQLASHELQQALHVQRLSEETALKRLKVLA
YIRRQIQNPLSGIIFSRKMLEGSELGEDQKSLLHTSSQCERQLNKILDDTDLDSIIEGYL
DLEMVEFQLNEVLVASISQVMLKSSGKGVIIVNNLAESLMNETLYGDSLRLQQVIANFLL
ISVNFTPNGGQLGIAGNLTKDRLGESVQLARLEFRMTHSGGGVPEELLDQMFGNNGAASD
EGISLLISRKLVKLMNGDVQYLREAGRSTFIISVELAVASKPGA*

>g21217.t1.1.5bbdf937
MSGLEVHQVCLPPQKTTLQKLRHRFSEIFFPDDPLHKFKNQTWFNKFGLGLQFFFPIFQW
APNYNFRNLRSDFISGLTIASLAIPQGISYAKLANLPPIIGLYSSFVPPLVYAVLGSSRH
LAVGPVSIASLVMGTMLSEVVSYTDEPILYLQLAFTATFFAGVFQASLGLLRLGVIIDFL
SKATLVGFMAGAAVIVSLQQLKGLLGMVHFTNKMQIIPVLTSVFENKHEWSWQTIVMGVS
FLILLLITRKISMRKPKLFWLSAASPLASVILSTVLVVLFKSKLGGISTIGHLPKGLNPP
SSNMLYFHGSFLAIAIKTGIVTGILSLTEGIAVGRTFASLKNYQVDGNKEMMAIGFMNMA
GSCSSCYVTTGSFSRSAVNYNAGAQSVVSNIIMAAAVLVTLLFLMPLFYYTPNFILAAII
ITAVFGLIDYQAAYKLWKVDKLDFLACICSFFGVLFISVPLGLAIAVGVSVFKILLHVSR
PNIVALGNIPGTQIYQSLSRYREAQRVPSFLILAVEAPFYFANATYLQERIIRWVREEEE
RIQANNESTMKCIILDMTAVTAIDTSGIDTICELRKALENRSLKLVLANPVGSVMEKLHQ
SNILEAFGLDGLYLTVGEAVADISPSWKP*

>g41264.t1.1.5bbdf935.2.5bbe19fb
MAGGGSDAVETSTLSCAKCGKPAHLQCPKCVELKLPREDAAFCSQDCFKASWGSHKSIHL
KAKLSSLSQQDAASPTDDWLYCLKKGQARTPKVPNFDWTGTLRPYPISKKREVPAHIEQP
DWAIDGIPKIEPNSDLQHVVEIKTPGQIERMRETCRIAREVLDAAARVIRPGVTTDEIDA
VVHEATIAAGGYPSPLNYHFFPKSCCTSVNEVICHGIPDARKLEDGDIVNVDVTVYYKGV
HGDLNETFFVGNVDEASQRLVQCTYECLEKAISIVKPGVRFRDVGEVINRHASMSGLSVV
KSYCGHGIGELFHCAPNIPHYASILEKAASRNVTTCEILLIIMKLFVFSDICMICVLCYE
ICQW*

>g43074.t1.2.5bbdf93b
MQVKMKLMNLSRAQSEETRMKIGVGVRIGWEKRREKLMLQEVCLYEWQNLIAEASRRGVY
GEEELQFNSYKILDKKLKEDWVQSVEERKRTPRPKSSKRAPKSLEQRRKISESISAKWAD
PAYRNRVYSGLAKYHGITERVERKPRKKPSGDGHKRTRSPSKRIVDFDDSLNPEPRRQIQ
RVILKRSGVAPFEDPLASSKLEMLKNIRAQRAAAESKQTEAIARAKLLIAEAEKAANALE
IAAEKSPVAQASLVETRKIIAQAIQSISSIDEGQKDSQTDGSIPLASPELGSPTELILSA
SIKDPDQIVERQVNGAQTSASSNCDLLGFGFEEPTLRNFVNGTEVQPSSLSKRDLDNGKQ
DLYQTRPKYYSVAPALLDSVVKPSSCTGHSGDSELNGSIQHADRTLLNGVKSQCSNGEKS
SNSATVTKKWVRGRLVVVAEES*

>g8982.t1
MHNGTGPSMSHGTAQRSALDVAKEWETPYPTFIVVLKPRNVGGPLTLAMPREFPKEFPVL
NSVQDILISDRDSGEWTIRISKECGIPRFFSKGWRSFVKERNLQAGDVCVSYLIPIEELA
FLVKVFRAGDAY*

>g66894.t1
MANKTVIIAPLNAAWVAPNSIFDLFLESFRNGNGTQRLLCHVVVIALDQKAYSRCLELHP
HCYALSTEGVDFSGVANYMTPDYFKITWRKVEFQQTVLQMGYNFIFTVFSLSPYFYNNLF
ILIGIEQNSRKD*

>g66745.t1
MDPKELVNIIKILNPTNKAGRITVIVRMGAENMRVKLPHLIRAVRGAGQVVTWVCDPMHG
NTIKAPCGLKTRAFDAILAEVRAFFDVHEQEGSHPGGVHLEMTGQNVTECIGGSRTVTYD
DLSSRYHTHCDPRLNASQSLELAFIIAERLRRRRIGTQRLLSLTL*

>g61942.t2.9.5bbdf936
MDSKQFFTNGAIESQESPTTSAHVKRTVSLEKFLRRRCSPRLKDIPQSKRPYYGTSIKVL
RQHYDDNASSFDDYNVQQRDPPNGITQNAARSDPVNDSGSTNVDLTSSSGDRQCTIVEPF
NNNCIRSFTSSPTLDGKSSYALVKETIRTFDTYYLHLVQEEQIIRNKEEDSLQNDARDLN
QEVGFAERRTLVAPPKLRGVLCMDISGGQEEIRIPVINLVDDMPFAATGFTYSRSIQVAE
NVDLPPIADGCRCKGNCMHPKNCACARLNDSKFPYVRHNGGRLRKAKGVVFECGPNCGCG
PDCINRISQQGIKYQLEVFRTLDKGWAVRTKDFIPSGAPVCEYVGILRRTDELDNVDVND
YIFEIDCLHTIKGIEGREVYLFKKQNIFLLMCLCVFVRMASYFLLSVIKD*

>g39275.t1
MATKFLSLACIRNESRDLSPRPRYPSMPKYPKGVSSDEEKNMQGSESKALFSVIGMTCSA
CAGSVEKAVKRLPGIKEAVVDVLNNKVQVMFYSSFVNEETIRETIEDVGFEATLIKEDAN
EKSTQVCRISIRGMTCTSCSSTVESALQVIPGIQKAQVALATEEAEVHFDTKILSCNDLL
QAIEDTGFEAILVSTGEDRNKIELKVDGVRTDNSMRIIVDSLQALPGVEDINIEPELQKL
SLSYKADVTGPRNFMQVIESTGSGRFKAKIYPEGGGRDAHKQEEIKQYYKSFLWSLVFTI
PVFLTAMVFMYIPSLKHGLDTKVVNMLTVGEVLRWALSTPVQFIIGRRFYTGSYKALRHG
SANMDVLIALGTNAAYFYSVYSVVRAASSPNFESTDFFETSSMLISFILLGKYLEVLAKG
KTSDAIAKLMDLAPETAILLTLDDNGNVINEEETDSRLIQKNDVIKIIPGAKVACDGFVI
WGQSHVNESMITGESRPVAKRKDDAVIGGTVNENGVLHIKATRVGSESSLSQIVRLVESA
QMAKAPVQKFADRISKFFVPLVIVLSFSTWLAWFLAGKFNGYPKSWIPSSMDSFQLALQF
GISVMVIACPCALGLATPTAVMVGTGVGASQGVLIKGGQALESAHKVSCIVFDKTGTLTK
GKPVVVNTRLLKNMVLREFYELVAAAEVNSEHPLAKAIVEYAKKFREDEESNVWPEAKEF
ESITGHGVKAIVRNREVVVGNKSLMLKNNINIPIDAEEILSETAGFAQTGILASIDRELV
GVLAISDPLKPGAQEVISILNSMQIQTILVTGDNWGTARAVAKEVGIDTVIAEAKPEHKA
EKVKELQASNFVVAMVGDGINDSPALVAADVGMAIGAGTDIAIEAADIVLMKSNLEDVIT
AIDLSRSTFRRIRLNYIWALGYNLLGIPIAAGALFPSTGFRLPPWIAGAAMAASSVSVVC
CSLLLKNYRRPKKLDTLEMRGITVE*

>g65894.t1
MSLIPSVFGGRRSNVFDPFSLDIWDPFEGFPYSGTVANVPSSARDASAFATARIDWKETP
EAHVFKADLPGLKKEEVKVEVEEGRVLQISGERNREQEEKTDKWHRVERSSGKFLRRFRL
PDDAKMEQVTAKMENGVLTVIVPKEEVKRPEVKAIEIGG*

>g6689.t1
MNFFSASLSDLVLRLDIFGKLEKHRGCVNTVSFNADGNILVSGSDDRRVILWDWESGNVK
LSFHSGHHNNVFQAKIMPYTEDRSIVTCAADGQVRHAQILESGKVETKFLAKHQGRAHKL
AIEPGSPHIFYTCGEDGLVQHIDLRTGVATELFTCQPMKERNFMPVAYLNAIAMDPRNPN
LFSVAGADEFARLFDIRKYKWDGSTDFGQPVDFFCPSHLLGDEDVGITGLAFSDQSELLV
SYNDEFIYLFSKDMGLGPHPVIPSLASSRSDVTQKGNDHQTVSSPPDMDADTVVGPQVFK
GHRNRETVKGVNFFGPKCEYVVSGSDCGRIFIWKKKGGDLIRVMEADEHVVNCIEPHPHA
TVLASSGIENDIKLWTPKAAEKATLPTNIEKRIPKTRRWMYHRASPEDLMLQLISLQRRR
SSPGRGENSDVGRELLQFILSFNGNSDGSSDDSSDTNTAEDCLN*

>g35427.t1.3.5bbdf938
MSHFGRSGPPDIRDTYSLLVLNITFRTTADDLFPLFDKYGKVVDVFIPRDRRTGDSRGFA
FVRYKYQDEAQKAVEKLDGRIVDGREIMVQFAKYGPNAERIHKGKIMEPVYKSKGGSRSR
SPRPRHRDDYRDRDHRRRSRSRSRGREHENRRGRDRDHRHRSRSRSGSPDYHKDRGRGRY
DDDRRSRSRSYGSASPARRSPSPRRSPSPRRTPPSRGASPDALKHNDRSPTPKSVSPRGR
RADSRSRSPRSDTHE*

>g3825.t1
MNDISGNLASVITDGAFPNLQRLLLGSNLFSGPFPSSISNFSKLFWVDLGENLLSGPIPM
NLGNIRDLQFLQIGSNQLTSNPSTLELSFLDSLVNCKYLRAIRVDNNLLNGTLPESIGNL
SSTLQEITAFSCGIKGLIPSDVGNLRNIIKLELYDNELVGLIPETFKQLTKMQSLILGGN
KIQGPIPKAICDMKYLFYLNLERNHISGSLPERLGEPPSLSELYLGDNALNSTVPATFWS
NKDISVLNLSSNFLDGSLGSEISSTRSIRILDLSNNHFLGFIPSSVGQVQDLVTLKFSQN
KLNGSITESFINLVSLEQLDISNNSLDGSIPLSLENLHFLVHLNVSFNELSGEIPNGGPF
ANFTAESFTHNSALCGASRFKVKACKNHKLQLSSRIRLLKFIPASILSVLMAVALVFLSL
RCAKKGSLSSVYKGVFSSGMVAAVKVLNVEMQDAFKSFDVECQVLRNIRHRNLVKVISSC
SNLDFKALVLDFMPNGSLDKWLYSHNYCLDINQRLEIMIDVASALQYLHHDCMFPAVHSD
LKPRNILLDEDMTAHLSDFGISKLRGKDNEKSQTTTLGTIGYMSPEYGSKGMVSTSGDVY
GYGILLMETFTRRKRTDEMFQGDLTMTRWVSESFPGAVMEIIDANLLTRNARNFDIYVTC
LISVLELALECKKYSPESRIGKKDALVKLKKIHTKFQHNMTGG*

>g25700.t1.1.5bbdf93e
MVDKVERRRKSCSDQGCHVVVPEEFAEGCLVEGPDGIESPRTPELTNSLDLRMFVGTWNV
GGKSPHEGLTLSDWLKTPTPADIYVLGFQEIVPLNAGNVLGAEDNGPAAKWLSLIRQTLN
GIDNCDGLAATDSPLKHSPLRSPNSQEQSAVKPRISFSDLLSLDNKIDQEDLEKYLSFGT
RSNSYSSDEASPTPSPSPVSTRHSNSPRKSKYCLAACKQMVGIFLCVWVRSDLRSHISSL
NVSCVGRGIMGYLGNKGSISISMIMHQTTFCFVCTHLASGEKEGDEIKRNSDVTEILKKT
RFSHSSRIPGQPVPPDGILDHDKIIWLGDLNYRLAPNCGDAIELLKRNDWEALLEKDQLK
IEQRAGRVFKGWEEGKIYFAPTYKYLKDSDHYAGQTSTSKEKRRTPAWCDRILWKGEGLK
QMWYVRGESKFSDHRPVYSLFSVRVNASQANKSVPIISNTTKPSKVAAAQTIVLSSTCAA
AKVRAEELLLLTGADKCIQSAPMVSVTGQMATNQ*

>g76773.t1.3.5bbdf93c
MNTTTHEVLGVTTKGDTQMCFFDTPGLMLKKSGFPYSDMKVRMESAWSSVGLFDVLVIIF
DVDRHLKRPDSRVIRLIERMGSQVNPNQKRVLCMNKIDLVEKKKDLLKVAEEFKDLPGYE
RYFLISGLKGSGVKQLTQYLMEQAVKRPWDEDPFTLTEEVMKNISLEVVREKLLDHVHQE
IPYNIEHRLMDWKELRDGSLRIEQHFITTKMSQRKILVGKKGSKIG*

>g32570.t1
MRRREASDDEEDEGGDGENLKPHRRIVDSDVESDGQGAAAEYEDEDLEEEEEEDYVEEED
DEEITYEDEYVEELEGGEYVEERRGEIGEVDVAAKKAEAQAEGQKEGPEDRFGPKSIEGP
QGFNHDGHFGDGANETRQGEVKEEGEKKENEPYAVPTAGAFYMHDDRFRDNAGGRNRRTF
GGRRLWESKDDKKWGHDKFEELTMQERHFDEGRRNSRGRYRGRGRKRGAERGGYVRGNRP
RTYGTNNSQSKNNNHNNAPKSVRGRGPRRYQQSFKGNDEVPPALNQQSGKAAEKPSHTNS
GKASALAYNVEPEAAPAKKHVFASSLNSASPPFYPSASTSKEIAITQKGDVQTGTNNRRI
DSSVVDESFSTAQSSAVQRGKSVVDSIGMDKLYINDSIATVAGKPSTALQFPPGSSSMSS
SQSMQPRAQGRGLNSLPQTYQSTAPNSQGNRFSPPTQIHTAQRNPFQNRGQPSLRATGQQ
FVQNPGGGSQVSSPKAVLNKSSFESGETDSSAESNKSKSALVVKGKGGVQGSGRGSFLYG
GAQVIGASGNLGNGPGDQNFPAFLPVMQFGGQHPGGIGVPAVGMAFPGYVTQPQLGGLGN
SEMTWLPVLAGAAGALGATYCSPYLALDGSYHARPSGQASSPAAASIKENNVDKPNNEWN
PSQRPEVSNDDFVQRQKNPRRYTEMKFDQ*

>g24175.t1
MFPEAEGTPSQQEVHSSQFGSQVTATTDFKSTASIFTIVQRMFGSTRAASLLGEELAGKV
TKQTLAAQSSTKKIPTITKNAAAVASQPVKQDVSSPVQDPPKTHLSESYDNECTMS*

>g26108.t1
MATAATNPKVENPKKPLAQPQPNPSDPNPSARSSEDVRPRATATPPSAGGGGGETKAAAV
SSEAADAGGAVTDIQKKIRRAERFGMSVQLSEEEKRNSRAERFGTGTGSHGSEGSKKSEE
NKRKARAERFGLAQSTSGDEEAKKKARLARFAPASKPDPVEEEKRKARAIRFSQNESTSL
TQENGNGNLETKAAAVGKAGGGL*

>g44013.t1
MFHEFSTANIQIDKDFSAKLSGYGCISHIPETDISSSNSALANLSVETRERGLLTPKSNV
WSFGIVLLELLTGRKNLDSRQPKEERDLVKWSRPFLADDCRLSLIMDPHLKGRFPSKAAR
TVADVAQKCLQKDPSVRPTMRAVVEHLKTIQDMKHPSRFPLQEPGAVSGKHMSRSPSLME
SLPQRRG*

>g9897.t1
MQDNSKEPLLSSNSPREDDTIPEGSQEYLLRRSNISFASSFVADADDIPPINGVRDFFKE
FTVESKKLWYLAGPAIFTSLCQYSLGAVTQTLAGHVGTLELAAVSVENSVIAGFSFGIML
GMGSALETLCGQAYGAGQIDMLGVYMQRSWVILNATAVILMFFYIFAVPFLRLIGQTEDI
SKAAGTLAVWMIPQLFAYAMNFPIAKFLQAQSKIMVMAWISAVGLALHTFFSWLFMLKLG
WGLVGAAVVLNVSWWLIVVAQLLYIFSGTCGRAWSGFSWKAFQNLWGFVRLSFASAIMLC
LETWYFMALVLFAGYLKNAEVAVDALSICTNILGWAVMVAIGCNAAISVRVSNELGAAHP
RTAKFSVVVVVVSSFLIGVLLSVFLLVFRKQYPSLFSESDEVKKLVYDLTPMLAFCIILN
NIQPALSGVAIGAGWQALVAYVNIACYYLFGVPLGLILGYKINMGVRGIWYGMASGTAIQ
TVVLFWIVHRTNWNKEASVAAQRIRQWGGEPDAKENADVEK*

>g1273.t1
MVSNRFPGKGREKPFSEICETSGGLKEDSSPLPPPPAKKLRLGDSPGSPPQEVSQSSDGG
SEETKARYVPLIERLGLNKNPQTFEEWESIGIQITQASLKDPYLNFRPIGDGEVLDMNLI
RKYLKQVEESDGFDVDVYPGPCAAVTFIPVTDFKTNPDYYKDLFFFFGYYKDLFEMATLA
LDEFNEDNQDSSKRVRYELVEIEKATFLPCSGDIYHITFRAREAETDNIRTFQAKVLSE*

>g39224.t1
MASNNSSSQSQAPPYRPYRLKKILTSHTRAISCVKFANNGKLFASSSLDKTLIVWSAEFL
TQISHLVGHSDGVSDLAWSSDSTYICSASDDRTLRIWEARSSECVKTLRGHTDFVFCVNF
NPQSNLIVSGSFDETVRVWDVKTGKSVHVIRAHSMPVTSVHFNRDGSLIVSGSHDGSCKI
WDAASGACLMTLIDDKVPAVSFAKFSPNGKFILVATLDDTLRLWNYAAGKSLKVYAGHVN
RVYCITPTFSVTSGKYIVSGSEDKCVCIWDLQGKNMLQKLEGHTDVVISVTCHPIENMIV
SAGLDNDRTLRVWTQD*

>g71675.t1.1.5bbdf941
MGANTLQICPLFPITPKHALISRPLLPFPLSKYPRFSSKLETQKDKLQLTHNASRNDVGF
DAAAYEADRLSRDAEARSAMAETSRKETHDESDPKAWKWVIRKRVWDLMEVQNIAQFPRP
VHHRIPNFIGAHIAANRLTELEEFKVAKCVKVNPDTPQKQVRFLTLDAGKKLLTPQPRLR
TGFFSLLEYQMLTPSTIKEACTSVGVAKYGRPIGLDEKIKVDLIVIGSVAVNPKTGARLG
KGEALYDR*

>g56326.t1
MARIYDNWERLVRATLRREELRIIGQRTPSDVSLASLSSSSSFSFNASSGRVSSFNFPIF
KVGDSFSYSQILQATGYLSKSNLIKQGHSGDLFYGVLEDGIQVVVKRIDISSVKKESFFI
SELEILGKLSHSRFVPCLGHCLENNKERFLVYKYMPNKDLSSSLFTDEVPEHKYDLISLD
WITRLKIAIGAAEGLCYLHNECVLPLVHRDIQASSILLDDKFEVRLGSLSGVCTVDDGNE
NKVANQNKVARFLRLPKASGQGTTGTSNATCEDDVYCFGKVLLELVTGYLGISAAEESSL
KDWMAKTVSCISIYDRELVVNIVDPSLVIDEDLLTEVWAVAIVAKFCLNPKPLMRPTMAY
LLKALENPLRVVTGEEAESAWFAESIASRQSCRSGSVGPTQVITKFVL*

>g31293.t1
MKFMKLGSKPDSFKTDGNNFRYVASELATDIVVNLGDVKFYLHKFPLLSKSSRLQKLVAT
ADDGSDEVNIHDIPGGPAAFEICAKFCYGMTVTLNAYNVVAARCAAEYLGMHETVEKGNL
IYKVDVFFNSSIFRSWKDSIIVLQTTKSLLPWSEDLKLSSHCIDAISCKASGDVSKVDWS
YTYNRKKLPEENGNDPTWNGVRSRVVPKDWWVEDLCDLEIDLYKRVIVSITNKGIVPREV
IGEAVKAYAVRKLPGFGKDGIQCSDVPRAQTVLDAIVCLLPAERGSVSCTFLLKLLKASI
LADLGEMPKKELVKRIGQQLEEASLGDLLIPSKNGETTIYDVHVVQKILEEFMTQEYNIA
NGKEDEIQEARRPGILTEASKLMVAKLVDGYLAEIAKDPHLPLSLFVDLAEMVSSIARPA
HDGLYRAIDTFLKVHPGVSKSERKRICRLMDCKKLSVDACMHAVQNERLPLRVVVQVLFF
EQVRAAASSGSSTPDLPKALKDLNSASHGSSRSATTNTEEDWDAVASAEELRALKGELAA
LRLGNGSISERNGGDSRNHNDRAAISKMKGLLMSKKIFSKIWSSKGGQGENSGSDSSESL
GSANLEEAKSTPSRRGRHSVS*

>g37534.t1
MKKIYFLLGLLLLSYWLACLATATTNITTDQSALLSLRDKIIFEPHQFLANNWSITSSVC
DWMGVTCSSRHRRVIALNVSDMGLTGTIPPQLGNLSFLVSLDMSRNNFYGELPHGLANLR
RLTQLRLGFNNLSGDLPSGFGDLQKLRYFSLRNNSFTGSIPPSIFNLSNLETLQFSFNSL
EGMIPKAIGNYRNLKNITINYNMLYGSLPFEIFNITSLEVISLGGNSLSGSLPVNICNRL
QRLTRLDLSHNMLSGQIPSLLSPCSKLQALVLCFNNFSGPIPKEIGNLKLLEKLCLGYNM
LYGSLPFEIFNITSLEVISLGGNSLSGSLPVNTCSCLQRLTRLQLSHNLLSGQIPSILSP
CSKLQILSLSFNNFSGPIPKEIGNLKLLEELYLGKNNLEGMIPQDFGHLQNLKILNMENN
KFTGSISSNLGNLTLLVQLSLRSNKLAGTIPQELGNLHKVEILDLNSNSLTGSIPVQLFN
ISVLQELRLIDNNLSGNLPPTMGYRLTNLEHLFIGGNQLDGVIPASISNASKLASLSLAK
NKFSGPIPNSLGDLRLLRKLELVKNNLTSEPSSLELSFINYLTNCKYLKVLAFGDNPLHG
ILPISVGNLSTSLERLYAYGCEIKGKIPDGIGNLSNLFVLSLDGNHLSGRIPTTLKALQK
LQVLSFFDNQLSGSLSDILCDLKSLYGIHLGQNQIQGSIPSCLGNVASLRNIGFGGNLLN
SSIPTNLWKLNDLLMLNLSSNSLSGTLPQEIQNLKVLIDLDLSRNHMYGNIPSSIAGLQG
LIHLSLAQNRLEGPIPESLNHMLSLEFMDLSHNHLSGPIPKSLEKLSHLRYINLSFNYLS
GEIPSSGPFKNFTHKSFMFNDELCGAQRFLVPPCNTSPIQRSNRKKILEVIGTLLGIAAV
VTIAAVLFLIYRRKDEVPRTTDLMPKGLPKKISYNELAQATNGYDDSNLLGIGSFASVYR
GMLDGKLVAVKVFDLSTEVTFTSFDRECEVLRNLRHRNLTKVIGSCSNLDFKALVLDYMP
NGSLEKWLYSHNQFLDLMQRISIMIDVASALQYLHYGSTTTVVHCDLKPLNILLDDDMVA
HVSDFGIAKFLDEENSILHTKTLATLGYIAPEYGLEGQVSTKIDVYSFGIVIMETFSRMK
PNDEMFSGDVSLKSWIEDSLPHATAQVIDSNLLRLDDMHFTQKLECISIILKLALNCCKE
CPGDRITTQDVAVSLHKIKRQLDAL*

>g4987.t1
MARRPGTNGLEQIDKHCLFATSRVNKFPSTAVSRRLGGQTGTLLSYNLPLSSRHQGRRTA
PIQIGLTRRDSTANTTTNWNHQDAPGTQGEKDVIFPELQGDSNHKTKMESGKISGLEKNR
RFNSRTLRILILTGSTRCHQLFRLLSSGQPKLPVLHSTDRPN*

>g55725.t1
MPCATYPEKLVFHVVTDKKTYTAMHAWFAVNTINSAVVEVKGLHQYDWSHKVNVAIKEML
EIHHLIWKQKYANLKEEAIEYQQDLDKNLEVLSPSFVSLLNHLRIYIPELFPDLDKIVFL
DDDIVVQHDLSSLWELDLNGKVVGAVVGSWCGPDCCPGRKYKDIFNFTNPIISSKLDCDH
CAWLYGMNIFDLQAWRKANITAAYHQWLKFNLNFGFTLWHAGALPPALLAFEGHMQRIDP
SWHMAELGHRSPQFNEHMLETTAVIHFSGPAKPWLEIGAPEVRRFWYRHVNFSNRFIIKC
GIVG*

>g49890.t1
MAPATAPMPAQFTIFVLATAFLVIHASPTIKEEATVQIPFSYVGATGPDKWGSLNPAFSE
CSKGKSQSPIDISKGEVALDKNLRPLTRQYSYINATLVNNGFNIGLHCGENSDWLISDGK
TYKLKQMHWHCPSEHRIDGVRYDAELHLVHIADDGSIAVIGILYHLGHPDPLIAKIQNQL
YQLAKEKFGVQEGDQIPLGKFSMHQLKRNTRKYYRYSGSLTTPPCNETVAWYIIGKARSI
SSEQIQALKAPLGLAYKNNSRPVQPQNGRLVELYEEAMN*

>g8635.t1
MEKKQLNLNAPLLSVRKSTSNLGFPLPARNSTSKLGPSDGKNTRLVHKSGPIRLQSLPVQ
KSDWELGEVTKPAAVPFVWEQIPGRAKSECDDQTETPKRSVSAPRLPPGRLPEVVRRYSG
ERSNDQNIYRRQTEVYPVNDHAALIDSLRESIYGNEESDSESVDDAYSDALDALSPTASF
SFNCSASGLSGSEVPSKKKSGTFCVDPQTRDFMMSRFLPAAKAAVLETPQYTPKKQPVAT
VTEPPKQIRKMVSGERKPLLNQYGSNIISFYNQYAEDTQSEGEDTQYIEPKRRSGKTWGI
FPRLCVKKSLCLLNPVPAMKTRTPVPKSPPTYVGRLTRKAYSGPLDKKAYSGPLDKQASD
ANNRIRFHSGVLSRELLQVEKKQSESKQFADTSYKAGGLSPCRPLRSGGISPYRNASPRS
PFSKEARFLGLPKATDNVTAEKYNSLYRKCSNLLDAAPPRIQKQEAVSPNEVAEKMVYID
SITRINLTKYLASSKLERHTNFPKENLDSQDSKKLEKDNLHAYSGKREVKSLDIMMEGTK
FDTKSSLLVHGVLPSSNGISKLGGLADKTDALQLKKSFCEGARSFDVNNELEAQPDTNAV
TLQSPLAPPLPKSPSESWLWRTLPSINLRIPFSHSNHGKHFHPKKVDQKVSAASTKWETI
VKTSKQCHDHSHYSEEYFPRVSYKQNKM*

>g43186.t1
MSSSSSMLSPTQKYAAGALFGLALHQSQILQTSQLGANNDDDAGPIQDRISSGSGSVSDD
PLLWVHESSDLLRPIFQYMEIDSKAWSALEETCACSPVKHHVGAFLRLLSEETDDASSDV
ADKVLALSRGVDSMASSFESSPVDHESKKEKQREYESECREKFSIAANQQEIGGKPSSIE
GIRIESTGKFDEKPLEELTMVGYPKKVAVLYELLTACLTDTPEDNKEDKKRRNGYDARHR
VALRLLATWFDIKWVKMEAIETMVACSAMAVLKDEESKEETQSPQSTWSKWKRGGIIGAA
ALTGGTLMAITGGLAAPAIAAGFSALAPTLGTLVPVIGASGFAAVASAAGSVAGSVAVAA
SFGAAGAGLTGTKMARRMGDVDEFEFKAIGEHHNQGRLGVEILISGFVCEEEDFVKPWEG
INSNLERYALQWESKHLIAISTAIQDWLTSKIATEMMKRGAMLTVLSTLVTALAWPTTLL
SAIDFIDSKWTIALDRSDKVGKLLAEVLVKGLQGNRPVTLVGFSLGARVIFKCLQTLAEK
DNSAGLVERVVLLGAPLAIKDVNWEAARKVVAGRFVNTYSTNDWMLGIAFRASLLTQGLA
GIQPVVVPGIENVDVTELIDGHSSYLWATPQILEQLELDIPYPVLNHAVAKT*

>g59554.t1
MAAASAISSSSLSTTLFPICNASTITISSKRKLSVLPLPSSAAKFQTLLVKPSRFSFSTV
SAAPEALETADPPSFQDEASGAETLSVGADSDRVAPKQKIRIKLRSYWVPLIEDSCKQIM
DAAKNTNAKTMGPVPLPTKKRVYCVLKSPHVHKDARFHFEIRTHQRLIDILYPTAQTIDS
LMQLDLPAGVDVEVKL*

>g63935.t1
MITYFKKTHILTFLTSGADCNKLEAVQQDSRFTGADVIAFHFHGKRPSLTTLLSEGEGVK
WLPTTASGVSITRLRDTSAAVIEVEGNFQIKATVVPITEKESRIHNSGFTDEDCFAHLDL
SFKFYSLSGAVNGSDV*

>g47142.t1
MQSVKRKANSNTSHQQQQEEQQLPKQKERHIVSWSQEEDDILREQIRVHGTENWAIIASK
FKDKTTRQCRRRWFTYLNSDFKKGGWSPEEDLLLCEAQKIFGNRWTEIAKVVSGRTDNAV
KNRFSTLCKKRAKHEALAKENNTSYINLNNKRVFFPTGLSTDGITETAGPLKKMRRTHIS
DLTESCNHGEKLAENCGTTTQLLRPPFADLAQNIHHIGINLTSQQHVSDVKEASINAGNS
IQGTFLKKDDPKVLALMQQAELLSSLAAKVNSDNTDQSLENAWKVLQDFLNQNKESDELC
FKITDMDFQLETIKDLVEDLQGSNDSSHPSWRQPDLYEEPSGGSEYSTGSTLPSHVPLDK
REQCQSIAYQRIGPDLQSTHASDQCGLVGGENEMSGSDPRNKDILPNCDEIKADGVAACG
YSNTEFSSPVQETPLFRTIAAAIPSPKFSESERHFLLRALGMESTSFNSSSNPAQPPACK
RALLQSL*

>g39053.t1
MEIERASPQLIAKKLWNIVRIVFYMLKKGITKSKLMLDLHMMFKTGKLAGKAISKLMLHL
HDDYSNSLACRSTDVNMSIVHRREYEFSCSNSPAFPSYFSKRKHHGHHHYHHRGYHYKPE
DIHVVQKVFEILNNYEKVEASPMVLPGFGHSPMVRQLRVTDSPFPVKDYEENPQVDKDAE
EFIKKFYKDLKQQRRVAAALESPSPYHVWAR*

>g54914.t1
MESEEKVAINVDPGTEVKININASKPVHPEQAEFPRYVHYSDGAISLASSINGKLSMLVS
DPLNYGTVCICKVPEKHRKKNEEAYTPRLVSIGPLHHGESQLQAMEEYKLKYLNNFLHTF
RVPLELLAEYVRSQEKLVCGCYEDNYIRDIFKLSELILLDAIFIIELFLKSHFPEMREMG
DTIFENPWASNDILHDLLLLENQLPMRFVCTMYNGFAYKKLSKFLDDDSTDPPSFHELAH
GYFKNVGNTGKLELPPGFLRSRHLVEFLAILHSPKHPRAEPKPGKSSEFARCPTASKLLA
AGVKFSRGLDKCLFEIHFDKGELKIPQLTVNDSTETFFRNLIAFEQCGYHTRDITSYVIL
MDNLIDTPKDVDILVEHDIIRNLLGSSEQVAHVFNTLYKEIITDPKEFYFAKHCSELNEY
SRDLWHKCKSKLSTWFAMLGRDYFSSPWSITSVVAAIVLLVLTVIQTVCSVLQV*

>g27556.t1
MDNLATSLFSELGMEDQFLSDQCDIMDFFEEDISAALVDGFQNFLSPEGNSSFSTVIPAS
SSISTLCVTSAMEAPPVVIERPAKQHKPNGYNLSNIHNMPNFDQPSSSPPMVLTFGNPNI
PEIRPQQVTVGTLNPEDDAASEVLTSQGSFVNLNEATKTTVQAKTKKTGGRIRPRSQTYD
HIIAERKRREQLSQRFLALSALVPGLKKMDKTSVLGDAVKYLKHLQERVKTLEEQAAKQT
MESVVLVKRSQLLLEDEGSSDEMGGPDEQPLPEIEAKVCDKNVLLRIHCEKHKGVLIKIL
SEVEKRNLAVTNTSVAPFGSLALDITIIAEMEKNIRLTTKELVQSLRSALQQVKRAS*

>g51752.t1
MSSSKMIELKSSDGETFEVEEAVALESQTLKHMIEDTSAETSIPVPNVTGNILARVIEYC
KRHGPTDPKSSAEDLKSFDQEFVKVDQTTLFDLVLASNYLDIKSLLDLTCQAVADMIKDK
SPEEVRKIFNIKNDFTPEEEEQVRKENAWAFE*

>g55866.t1
MKFNIANPTTGCQKKLEIDDDQKLRVFWDKRISQEVSGDALGDEFKGYVFKIMGGCDKQG
FPMKQGVLTPGRVRLLLYRGTPCFRGYGRRNGERRRKSVRGCIVSPDLSVLNLVIVKKGE
NDLPGLTDIEKPRMRGPKRASKIRKLFNLSKEDDVRKYVNTYRRTFTTKSGKKVSKAPKI
QRLVTPLTLQRKRARIAEKKKRIAKAKAEAAEYQKLLATRLKEQRERRSESLAKKRSRLS
AASKPSIAA*

>g27124.t1
MAAPIYNYVSPIHRYRYPYPFSSSSPPYFQEHLHTPNCLHSASRLSFYYFNNQRIISANN
KVIFLYRRRRRDLIMNCQTTTEQKPISQDRMLVFVPPHPLIKHWVSVLRNEETPTPIFKS
AMAELGRLLMYEASRDWLPTIAGEIQSPMGVASVEFVDPREPVAVVPILRAGLALAEHAS
SIFPAMKTYHLGISRDEETLQPTVYLNKLPDKFPEGSRVFVVDPMLATGGTIVAALNLIK
ERGIDNNQIKVVSAVAAPPALQRLSEKFPG*

>g21282.t1.4.5bbdf941
MKNSVSEQSFYIESDEEDEEKALEKEENEGQNEGGNDYDNEDGNDSDSSNYSNDNENERQ
EGKSVTPSWPQSYRQSMDLYSSVPSPSVNFLGTPTLSHLSNSFLSSSLTRRHTPEVLPSL
QKPLLPPVADAQQPPERRSSHSLQPPIPERGSSFKRTAADRKSAKVSHEVSISRQSSYGQ
AVLNGINVLCGVGILSTPYAVEEGGWAGFSILFIFAVLSYYTGILLRSCLDSQPGLETYP
DIGHAAFGTVGRIAISIILYVELYACCVEYIILESDNLSSLFPNAHLSIGGLELNSKHLF
ALLTAITVLPTVWLRDLTVLSYISAGGVVASILVVFCLFWVGLVDKVGFEPNGTILNLST
LPVAIGLYGYCYSGHAVFPNIYRSMEKPSQFPAVLLACFGICTLMYAGVAVVGYLVFGES
IESQFTLNLPQNLVASKIAVWTTVVNPFTKYALTMIPVAMCLEELIPANHMKSYIYSILI
RTALVISTLIVGLSVPFFGLVMSLVGSLLTMLVTLILPCACYLRILKGKTNQFQVKPICA
MLHL*

>g46112.t2.7.5bbdf938
MMLGRLSSFTCSRVVLVVVVAVSLYCRCPQLFALAQRAHPSEVSALEAIASNLIDQKNYL
KDWRKGDPCIANWTGVLCFDALGADGYFHVRELLLMNMNLCGNLAPELGQLSQLQILNFM
WNELTGSIPKEIGHIASLRLLLLNGNKLSGSLPNELGYLSNLDRFQIDQNQLSGTIPKSF
SNLKSIKHIHFNNNSLSGQIPSELSNLSTIVHLLLDSNNLLGYLPSKFSTFPELRILSLR
NCSLKGPIPDLSRMPNLKYLDLSRNQLSGTLPLNNLSNNITTIILSDNQLSGSIPESFSY
LPSLQRLSLENNFFSGSVTVDLWQNRSFSSAARLLIDLQNNSLSNMIGALDPPVNVTLRL
QGNPVCRNANIRNISLFCGPEAEIYDVPNTSTNSTDLCRIQACPIGNYFEYAAESPVPCF
CASPIRIGYRLKSPSFSYFPPYEYPFESYLTNSLNLSLYQVSIDSYSWERGRLKMYLKLF
PVASADHSGTFNKSEILRIRGIFTSWEFRGNDLFGPYELLNFTLLGPYSFVVISATVTVF
ITKSHERYQLASSRKHLSSKLCIKIEEVKSFTFGEMASATNHFSSSTQVGQGGYGTVYRG
TLADKTIVAIKRAKEGSLQGQREFLTEIELLSRLHHRNLVSLLGYCDEEGEQMLVYEFMP
NGTLRDWLSAKSGETLNFGARLCIALGAAKGILYLHTEAHPPIFHRDIKASNILLDSKLT
AKVADFGLSRLAPVLDDEGALPEHVSTIVKGTPGYLDPEYFLTRKLTDKSDIYSLGVVFL
EILTGKRPIMHGKNIVREVKLAHQSGTMFSIIDSRMGSYPSECVERFVALGIRCCQDKPD
ERPSIIDVVRELENILRIMPETGVDSSESKSKYFSESLLSSSPSANTSNRYASSSNSGGY
LISGVTLTVTPR*

>g19748.t2.4.5bbdf934
MSSKKYGCKTATETREWIQAILDFLQPYRLFLDAHVVNIFTHKLWEAVDNEWLDCLRNEP
IENLLQIPSGVVHDHWPTSLKDFVLTIKSLSFPRQQANLLQEFPGLEIASLNNVLAQGMN
RKKKHEIEALAAIVSSVAREVGSSTVVDVGAGQGYLAQVLTFEHGLSVFAIDSCLHHGKI
TDARAERIRKYYAAKLRKSGSENRELIMPKTVTCQVLSANMLKTLSNSLIQGEKVKPNII
KENISKQCQEAPDDSELPSTSHMCGYSSLVLVGLHACGDLSVTMLRTFLECDKVKSVISI
GCCYNLLSEKGYKETSSVCGFPMSKGVKSTGFALGKSACDLACQSAERWISLGKFAGLHN
FEVHSFRAAFQMVLSQYYPELLIKSPSIGRQGKALRRQQHQRTLESNLNHKGPEGSSDRS
WFAAGRIESGNIEEKGSCWDNDAFSSVYSNQNSMIEENSPIDRFSLFLKFCHSGLSRLGV
HHFQDIDFHKVWEETQLFAVSCSSILS*

>g31185.t1.1.5bbdf93b
MALLTPIPVPYSLSFCKTIPQSSRICRKRLPSPPLASLSPSSPSSSHESSTQNKVESAKL
SSEKGFNYALASPNGDSVMRFVRSTESNIERVIFDFRFLALLAVGGSLAGSVLCFLNGCV
YIFEAYKVYWTSCVQGIHTGNMVLRLVEAIDVYLAGTVMLIFGMGLYGLFISNVDPNVSP
SEDRAIKGSSLFGMFALKVLCFAGKTKMDEN*

>g37823.t1.1.5bbdf93f
MEEEEGDIGKKIKIGVCVMEKKAFSGPMLQILDRLQAFGEFEIVHFGDKVILEDPVESWP
ICDCLIAFYSSGYPLEKAEAYAALRKPFLVNELEAQHLLHDRRKVYECLERYGITVPRYA
LVNRETPYQEVDYFVEEEDFVEVHGNRFWKPFVEKPVDGDNHSIMIYYPSSAGGGMKELF
RKVGNRSSEFHPEVRRVRREGSYIYEEFMPTGGTDVKVYTVGPEYAHAEARKSPVVDGVV
MRNPDGKEVRYPVLLTPTEKQMARDVCIAFRQAVCGFDLLRCEGRSYVCDVNGWSFVKNS
YKYYDDAACVLRKIFLDAKAPHLSTTIPPTLPWKVNEPVQPSEGLTRQGSGIIGKFGQSE
ELRCVIAVIRHGDRTPKQKVKLKVTEEKLLNLMLKYNGGRPRSETKLKSAVQLQDLLDAT
RILVPRTRPGRESDSEAEDLEHAEKLRQVKAVLEEGGHFSGIYRKVQLKPLKWVKVAKSN
GEGEEERPVEALMVLKYGGVLTHAGRKQAEELGRYFRNNIYPGEGTGLLRLHSTYRHDLK
IYSSDEGRVQMSAAAFAKGLLDLEGQLTPILVSLVSKDSSMLDGLDNASIEMEEAKVCLA
VLPV*

>g18495.t1
MSRHLHGSSMYKRGSSRDNMDSFDTEDNSALLQNGVEQETSTPSWKHSLPHVLVATIVSF
LFGYHIGVVNEPLENIASDLGFNGNTLQEGLVVSTCLAGAFLGSLVSGYIADGVGRRRTF
QLCTFPMLVGAALCATTRTLAGMLLGRFLVGTGLGVGPPVASLYVTEVSPAHVRGTYGSF
IQIATCFGLMASLLVGIPVKSIVGWWRYCFWISTVPAAILALAMVFCVESPHWLYKQGRI
ADAEAELERLFGGSHVKTAIAELAKLDRGDEVDSVNFTELIFGRHSRVVFIGSTLFALQQ
LSGINAVFYFSSTVFRRAGVSSNLANVFVGIANITGSTIALILMDKLGRRILLLWSFFGM
AAAMALQVFAASLPATTFGTSYLSIGGILLFVLTFAIGAGPVPSLLLPEIFPSRIRAKAM
AFCMSVHWVLNFFVGLMFLRLLEQIGAQLLYSIFGTFCLMAVIFVKRNVMETKGKSLQEI
EIALLPQ*

>g69630.t1
MDEMYGLHSSGDYADKALMSPENLMMAADYGYQSFISSYDHHRIHLYGSDDHVDVAAAGS
SGFHCSASVSEAASITPEEIQGVSRYGGEDDHDEDACSIIKAKIASHPSYPKLLDAYIDC
QKVGAPPEIACLLDEIRRENGRFYKGDAISACLGADPELDEFMDTYCDILLKYKSDLSRP
FDEAATFLNKIEIQLGNLCTGIFIHKLYIIFFCRL*

>g52179.t2
MGVLGLTKRFNVLSSIASRINSCSFRHLQRRPLSELKKNINKDDSILPVLIVGAGPVGLV
LSVLLTKLGVKCAILEKNTTFSRHPQAHFINNRSMEVFRKLDGLADDILSSQPPVDFWRK
FIYCTSLTGQILGSVDHMQPQDFDRSVSPVSVAHFSQYKLNRLLLEKLVNLGFQIVKCEK
FNGLNDVPIKEKEILMGHECISVNTADHGVTVTASFLREGRYMEKDIHCNFLVGADGAGS
TVRKLVGIDMTGERDLQKLVSVHFMSKDLGKYLINERPGMLFFIFNSEAIGVLVAHDLKQ
GEFVLQQVPFYPPQQKLADFSPEMCERLIFKLVGRELADINVVDMKPWVMHAEVAEKFLS
CNNRIILAGDAAHRFPPAGGFGMNTGVQDAHNLAWKIASVLDGITPVSFLSTYEKERWQI
ASFNTELSVQNFKSAMAVPSALGLDPTIANAVHQAINDSVGAILPDGIQKSILDGIFSIG
RAQLSDSVLNEKNPLGSLRLAKLRRIFEEGKSLQLQFPAEDLGFRYLQGALMSDDDSLLN
APEPPTGRRRDYIPSADPGSRLPHMSIKLLSNLSSKETFSTLDLVSTEKIEFLLIVAPSE
DSYNLAQAAFKVAEELKIPIRVCVIWPEKTTGGFGRTKAALESWTNFIEVVEVRNSQTLV
SWWDICQMTDQGAILVRPDEHVAWRTKFRVTGNPVLEMKRVFYTVLGIQPRQT*

>g11048.t1.2.5bbdf939
MSENLMDKVNAFGERLKIGGAEVSQKISAGVSSMSFKMKEFFQGPNQADKVVEDATSEHL
DDPDWASNLEICDMINHDRVSSVELIRAIKKRLILKIPRVQYLALVLLETVVKNCDKAFS
EVAAERVLDEMVKLIDDPQTVVNNRNKALILVEAWGESSSELRYLPVFEETYKSLKSRGI
RFPGRDNESLAPIFTPARSVSASEANATLAQQLHRGIPAQTFTAEQTKEAFDVARNSIEL
LATVLSSSPQQDALKDDLTTTLVHQCRESQYAVQRIIETAGDNEAQLFEALNVNDEIQKV
LSKYEDIKKPLEVKPEPEPAMIPVAVEPEDSPRVGKEDALIRKPASSRTGLHGGNNDEMM
DDLDEMIFGKKAGGTSEGGHDTKKQQGLKDDLISF*

>g45113.t1
MGKKGSWLSAVKKALSPEPNEKKDKKTRKSKTWFGRQRSVDLYSSHTETALATPTAPSGL
EGIKLTEAENEKNKHAFSVALATAVAAEAAAAAAKAAAEVVRLTAAARYTGKSKEEIAAI
KIQTAFRGYMARRALRALRGLVRLKTMVQGQSVKRQATTTLRCMQTLARVQSQIHARRIR
MSEENEALQRQIQQKHEKELEKKLRTSVGEDWNDSAQSKEQHEASLQSKQEAAIRRERAL
AYAYSHQQTWRNSSKSVNQTFMDPNNPQWGWSWLERWMAARPWESKIAVEKELDSDRASI
KSTTTRAASVGGFRSCYEDNKRSPSARGQTYPPSRQSPSTPHSRTPTSSLIAGKQRSPSV
KGSNRCTDEDLRSLCSAHSEFQRRHSIGGSSVRDDESLTSSPAVPSYMTPTHSAKAKSRL
QSPLGLEKNGTPDKGSVSSTKKRLSFSTSPATRRHSGPPKMDASPLKDISATS*

>g63627.t1
MASSAMLKLLCVGLMGLVLLVPQGEAVISCNTVYSSLYPCLPYVAGTGQLQKGCCDGIKN
LYAQASTTPDRRSVCTCLKNIAANAGTGTNLGRAQALPGQCGVKLPYKISTKIDCSKVV*

>g70421.t1
MALTMRTLKIKTSTCKRIVKELHSYEKEVDREAAKVADMKDKGADPYDLKQQENVLAESR
MMIPDCHKRLEAALADLKSILVELEESNQKEGVEIEEAQKAITEVEHLFQTDD*

>g7148.t1
MAASLRQNLNFLVPYSSTTKQPITRGYVSIRCGKRDNRGPLVKGRVLSIEAIQAVQALKR
AYRADPTNLNSNTHLSQTLSRLIKADLVAAFKELLRQEQSEIALRVFSAVRSEHNLDLGL
YADLVTGLGNKGLRKEIEGVVCELEKEGRIQCDDNGLVRLVRALIAAECGESTVRIYGLM
KRSGWGSTFEVDEYLAQVLIRGLRKFGEEELANEVDVELKKLYKGVLNKARI*

>g26670.t1
MRRTVTVHSNRVLETIFSSQLNKLPRKQVQSLSQVLFFCFFTTCVESPEPPSLSQTRKSN
GALPSTNFRGIAKSVVSKCSHLWDSNSNKGEPFINLSLKDYFLKLSNISPETIRRFWRLS
VLRPQDVQDILLGFESDCGKFEIEHKKIESLWGVFKWAGEQFGEFQHLPQSCKIMAKMLV
RVGLFSEADCLLSRLDVKGILLGYQEIFSDLIEGYLADCDLERAILNYNRMRRLGLSPSF
SCFRSLLDYLIQINETQLAYGVYMDMIKIGMGRHAGEKRIYENVVRLLCTDGRVQEARDL
IKSMLALGIEPTNIVFDAIVSGYCKKKDYDDILSFLIEIRGVPGVAVGNKVICSLSRSFG
AERANRFMQELEQLGFCPDGVTFGILIGQTCFEGSVKNAFIFLSDMLSRNIKPDINTCNA
LMSGLFMEGLWKQSMDVLLEMDDWGVIPKLSTFRVLLSGLLKARQFGQVKAIVGEMAGHG
LIHISSPEDHLSTALSLLGFNSLSMKVRRDNDTRFSKTQFFDDLGNGLYLETDLDVFEKK
LVKVLHDAMIPDYNSLMLKICTDGDIKVAVELVDEMAQWGQILSSSSASTLVKRLLASRI
NIKTINSILEKMPYSIYQLDLGAQNKLVQKYSRRGCTCRAKFIFDNMLRMKLEIENETYS
ALLISLCRKGNLRSFRHCWQLAQKSTWLPGLKDGKDLLDCLCESQLLNEALELLEAILVE
FSHRPLDASHALIERLCFSGFTGIADVLAMELLERGLILDDVAYNHLLRGFCKEKKLAEA
SLLVDAMVAKKFDPSLDVSLWLIPQLCKAGNFEKAVLLKEICLEKQSSTHLSVYYALING
LCKLRRVGEASNLLKEMSLKMQLPDKEVYSMLVQGYYQVNDSKKVGELIGVMIRKNVGMS
TSTYYNLVQLACKAGKFSAALSLKELVLEENNLPHIAVYNILLFHLSLVQDTTRIVDKIV
NEIQNKGLQFDAATYNSIVKCTSHCKDVPRSVCYLKTMITQGFRPSNRTLRKVISVFCCL
GELGKALELSQEMESRGWSHGSVIQLNIVEALFRIGKLREAVEFLDRMASKGLIPKNINY
DYLIKRLCQHGELEKASDLLNVMIKKGSILDSSSFDYLIQGFCISHKLDTALDYHSEMLC
RNLIPSSNTWNTVVNSLSGAGRVVEAERLLHVMVQIGETPSREMYSSVINKYRAENKLGK
ASELLEEMQKSGHEPDFETHWSLIRNFSSSVNKDDSSKSGGFLSKLLSGIGLSRKN*

>g66844.t1
MELYTLLFCISLLLFIIGPFLHGSSTKKTPPGPKGLPIIGSLLELGSQPHQSLAALAKIH
GSIMTLKLGSVTAIIASSPETAKEILQKQEQIFSDRTVPDVVTSQPNPQATLAWVPGDHQ
WRNKRRICSTQMFTTQRLDLLQHLREKKVEELVLYFKKRSVLGAPVDIGRAAFATTLNLM
SNTIFSIDMVDSEFETAQEFKDLVWRIMEDAGKPNLSDYFPVIKWFDLQGVKRHIRPAYR
RLHEIFEEVIVERLEDRKLGKRKSRKDDFLDVLLDQCEEEESGFDRETIKPLILDLFIAG
SDTSAITTEWAMAELLRKPEAMHKVRTEIIQKIGFERSVKESDVNQLSYLQAVVKETMRL
HPAAPLLLPYKANKDTEIFGFTIPKNSQVLVNAWAIGRDPNHWKNSLSFLPERFFGSELD
YKGRDFEYIPFGAGRRICPGMPLAVRMVNLMLASIIQAFSWKLPDGITPEKLDMEEQFGV
TLKKAVPLCAIPIIEENLGF*

>g14187.t1
MALQNVQNRDMGLVLSSDAKPRLKWTPELHQRFVDAVNQLGGADKATPKSLMRVMGIHGL
TLYHLKSHLQKHRLGKTQQSQNCNENKLEEETKNKRSNFTAEICEGTQNQINESLQIAQA
LQLQMEVQRKLYEQIEVQRRLQLRIETQGKYLQSVLKKAQETLAEYNTSAVGLELAKAEL
SQLASMVDIGCPSSSASVLTEIEGSVLKDTENKQLTGNGCSLESSLTSSESSGRKERTKP
MHEIDETEDWKRNSVVLSLMEMQPGQDSGLSNQASERKRTGSNISVEKRIAKRLQSQRSD
EQPRKFEFLGSLDLNRKYLNDFDSGPKTLELNCQGVEQSGW*

>g64763.t1
MSASKFIKCVTVGDGAVGKTCMLICYTSNKFPTDYIPTVFDNFSANVAVDGNIVNLGLWD
TAGQEDYSRLRPLSYRGADIFVLAFSLISRASYENVLKKWMPELRRFAPNVPVVLVGTKL
DLREDRGHMADHFGSNVITSAQGEELRKQIGAAAYIECSSKTQQNVKAVFDTAIKVVLQP
PRRKEMARKRRHRSSSCSIVRGIVCGGCVA*

>g58417.t1.1.5bbdf93e
MPFLASFQSMNSGTFTLDHASPFSITADNIFVLLGCSTTSPVFDQNEDLCYVIQVMVWLD
LPKLQRLSYSSVYGLGGDEGNPMKWQYGIPLQFNGSYYSESCKNCEDSGGFCGFSGFNQS
FACICRNGVNTTINCYGRGYAWSGTWRHRIQTKLRLGGFLFLWISLFI*

>g66718.t1
MGKITTLRDLIGAIKDKASLSKAALVSTPQTTTLRLAVLRATNHSSSTPPDDHHISALLS
LGDSSRSTASSLISSLIDRLHRTSDSTVALKCLLILHHIIERGPFILQDQLSIFPTAGGH
NYLKLSSFRDGATAFTWVLSAWVRWYARYVETLLSTSRVLGYFLGSTTFSMEKDEQEERI
SSFLNQDLIRDVDSLVGTVEEICKVPDPHFVEGNKLLYEVISLLNNDYLSTVNEILSRLS
EFNERLSCLSFGESVELVCALKRLEDCKEKLSLLFTVKKPSTDALWGLVTELKAKIGKLK
VDKEERKLLTWQKSEKASESARFVMKRDDSVLFSSGRLNMADKLSLLVVGES*

>g61709.t1
MAAAAAYKSVFDASIITAEFQNAHINTHFIPLIWKYVLQNPNCEWEEIPSLPSAAYPLLR
SKFKPCTSTLHSVIDSTDQVTTKLLIQLQVGPFARFSQNHSFFFSPFWALIFVC*

>g47647.t1
MEYPGDRKTNKNSKKILLTSLSAMVAETSTFPIDLIKTRLQLRGQSLSLPSTNAFKLAFQ
ILHNDGVFGFYNGLSPAILRHLFYTPIRIVGYEHLRTRIVPSDHPLSLSSKAILGGLSGA
IAQVS*

>g60850.t1.1.5bbdf935
MLCRGIVLSGTRTKKGAVPVYLNIYDLTPINGYAYWLGLGIYHSGVQVHGVEYAFGAHEH
STTGVFEVEPRQCPGFTFRKSILIGRTDLDPKEVRSFMEKLSEEYSGNTYNLITKNCNHF
CNDVCLRLTRKPIPSWVNRLARLGNIWLKS*

>g20422.t1
MRLNEVARRQLLVVVVLVAPVTTTTTTTTTHRSDKCAAKLKFLVHSSYLTTVPYASMSFA
GITSDGGSLKAMFVAAIHTPKLSSPNLILYRRRGIKRGKSNDTRHKKLEVLTQPPHCCRD
GDYTGDGLRSEHVHGRGCCTDLVQGCTLVYHCSVDQGGIVVVLGYRSLGSGGGG*

>g15231.t1.2.5bbdf932
MQIQSYVTRLLQVSSVFDDDTEGASVSDDNKVQTWNSQYQRGKPVVVVAKESPVLDKQNG
ITSSRIDEKPLLLPVRSLKSRVPEPIEMEISQESRVKSLNQPNSNSGSRRFSNSLRKSRN
GELAGLAPLNIEENMEENVVLRSPIPWQSRSGRIEMKENEDGLFPYSMPPSFEESELKKF
ESRSIRSQSFRTSRPESACPSPNKPSPPPSPHSPKTLSPLPSFSSESQSKSVEDVIRRKI
YVMSSPPPAPPPPPPPFIRKSPLVKSNSSLIDGDHFPEKGLRRGDRSMPNDSTDTDREGL
SRRANSGPESRPRAQSDVSLIGKSVRTIRTDEPVMKSMKFRDSDEERNAREVEATLIEKR
GFTDKLMQETAPTFRRQTFTNLPKAEKKEYIEKVLVETDESSDAETEDDYFEESVGSSGD
EVPANDNATDEGPDVDKKADEFIAKFREQIRLQRIESIRRSTEQRLKKQSR*

>g49184.t1
MTGIFINLEAIISVSSSIWRHHFGIFIGSEASNSWQRRTRRRAFDVALGFSSTCALPIRD
LHQLGGCTLGSSTTGRHHFDIIIDLKAPLRDLHQLGGHHY*

>g4704.t1
MVFSKIADIFPARATRPSAPKSSNVSPGLPPLPGSLRGFTFAGKGQKNNLRLSSSLQDFS
AYQQLDPEEGDNILEFQKNLPNPKQPNLLQRECGGSSFSKEKAIPGIASLRKKWFRVILV
LLCLLLLAFIVYVSQYLYFSWSRGASKYYVVLDCGSTGTRVYVYEASTNPKNDGGLPISL
RSLPAGFKRSSSQSGRAYNRMETEPGFDKLVHNISGLSGAIKPLVHWAKEQIPVNAHKST
SLFLYATAGVRRLPITDSDWLLNNAWSILKSSSFLCKREWIKIISGMEEAYFGWIALNYH
TGILGTIPRQETFGALDLGGSSLQVTFESNEEVRDENSLKLSMGPVNHQLSAYSLAGYGL
NDAFDKSVSHLLRKLPNIGNADLVSGNIEVKHPCLQSGYKEKYICSHCASSVYEEGGTQP
VGEKKSGRGVKPKIHLELVGAPNWEECSALAKIAVNLSEWSDQSPGIDCELQPCALAGNL
PRPYGKFYAMSGFYVVYRFFNLSSDAALDDVWEKGKEFCEKTWDVAKISVAPQPFIEQYC
FRAPYVVSLLREGLHITDSHVIVGSGSITWTLGAALLEAGKAVSTRLDLQSYEIMQMKLN
PIVLFSILAVSLFVLLFALCCVGNWRPKVFRRPYLPLFRHNNASAASVLKFQHWSPISSG
DGRGKLPLSPTIGGTQQGPYDIGYGFSGSGIQLSESSMYPSSSSVSHSYSSGSLGQMQYD
NSAMGSFWSPHRGQMRLQSRRSQSREDLNSSLAEAHMVKV*

>g45774.t1
MKGFGKRKGIYLGTSFKSKREGVGIRWDGELAHFGKENEGSFWGGKKVNWIAWLGGWISC
EEDSVCVEDLSEENGRMDRNEASCDSLGMDLVDLFYGFAMLFEGL*

>g31906.t1
MNRIFTRPTSHLRHIRRTLTTHSKDQTSSTTAFAADEPHLVNVLLWRYQILDPNGEIVNW
WNHVFLITCLISLFIDPLYFYLPRVRDAACMETDKKTSVDITYFRTLTDLFYLLHMLMKF
RTAFVAPSSRVFGRGELVMDAKEIAMRYLKSDFIIDLAATLPLPQAS*

>g61016.t1.1.5bbdf937
MLKFLKGVVAGSGTGPKDLPYNIGEPYSSAWGSWVHFRGTSKDDGAPVSIFSLQGNNAND
GHLAAGRNGVKRLRTVRHPNILSFLHSTEAETFDGSTTKVTMYIVTEPVMPLSEKIKELG
LKGSQRDEYFAWGLHRIAKAVSFLNNDCKLVHGNVCMSSVVVTETLDWKLHAFDVLSEFD
GNNGASTGPMLQYEWLIGSQYKPMELQKSDWATIRKSPPWALDSWGLGCFIYELFSGTKL
GKQDELRNTASIPKSLLPDYQRLLSSAPSRRLNSSKLLENSEYFQNKLVETIHFMEILNL
KDSVEKDTFFRKLPNLAEQLPREIVLKKLLPLLASALEFGSAAAPALTAFLKMGSWLSAE
EFSSKVLPTVVKLFASNDRAIRVGLLQHIDQYGESLSAQIVDEQVYPHVATGFSDTSAFL
RELTLKSMLILAPKLSHRTISGSLLKYLSKLQVDEEPAIRTNTTILLGNIASYLNEGTRK
RVLINAFTVRALRDTFSPARGAGIMALCATSSYYDVTEIATRILPNIVVLTIDPDSDVQS
KAFQAVEQFLQLVKQYHEKTNAGDNAGTASTGISQIPGNAGLLGWAMSSLTLKGKSVEQA
HVPSANTSAPLSSTASNASSVMDGASLAPVHKSSSSDMVNQPVPDSPTSTDGWGELENGI
HEDLENDKDGWDDIEPLEDPKPSPVLANIQAAQKRPVVQPKPQVTSLQPKGTSKMSKGED
DDLWGSIAAPAPKSTSKPLSSTRSGTADDDDDPWAAVSAPAPKTSFKPPSTKSSDSVDDD
PWAAIAAPPPTTRVKPLSAGRGRGTKPAAPRLGAQRINRTSSGM*

>g56068.t1.3.5bbdf938
MWSVLLEESRLWYDVERNKFLIFMQPTMEIKFLFQQLNKFYFLSRFQILRELIPHSDQKR
DTASFLLEVIQYVQFLQEKVQKYEGSYQTWSSEPTKLMPWRNSHWRAQSFVNHPQGMKNG
TGSGPMFPGRLDENSITVASTLQPSSQTPIESDLGKDVSSKTIDQQNELANQTMPIAMPL
HASMPVPVQSDGTINEDTLNHQEDLTIEGGTISISSIYSQGLLDTLTQALQSAGVDLSQA
TVSVQINLGKQANRGLASGVSISKDHGNPMPSGSQPAGHYQDTSNGEDLNQAQKRLKI*

>g57121.t1
MASKLLLVPSTLIVIIVIVGHVGMISSRPLPKDSQNNHRHQVFVWHEVFPIPGAIGPESL
AFDKDGGGPYAGVSDGRIIKWEGNESRWIDFAITTPNRDGCEGPHDHTRTESRCGRPLGL
SFDQNNGNLYIADAYMGLLVVGPNGGLATPLAKEAQGIPFKFLNDVVVDQSSGVVYFTDT
STRFQRRKYAYVMLSGDHSGRLLKFDPKTYEVTVLLDNLMFPNGVALSKNRDFLLVAETT
NSRILRLWLEPSKFGKVEIFRELPGRPDNIKSNEKGEFWAAANSEERGPFSWILSISWLR
RLLTKLPLDLAKVTAFLGGSKGYGLAIRLGENGDILEILEDKLGGTWKYISDVSEGNGNL
WIGSVTVPYTVKLHIPTSRT*

>g31862.t1.1.5bbdf93d
MDVIGGSATISPCSSYQPSSGVSYNPSPTSSSFPSPVSSCYAANANGTADANSLIPWLKN
LSSGSSPASSKRLHHLYIPGGSISAPVTPPLSSPTARTPKMKDNWNEQIGGSTWGGQQYA
FLPSSTPPSPGRQTPPDSGWLSGVQTPQDEPSSPTFSLVASNPFKIKEPLSNGGSHMWTP
GQSGTCSPALAAGLDQTADVPMADAISAEFAFGSSVMGLVKPWEGERIHEELVSDDLELT
LGNSSTR*

>g30120.t1.1.5bbdf93d
MVYTYTPTYYSTLQDSIASLCKNILPFSFKKRRLPAVAAAEQRLSKQQADNLKWQQDSFH
QILKLMGLCKEGILPETEVSAFRSHLLDTLIASPLDLEHAAILRDKLVFLQELLYARCIS
EDEYHSSKRPLLQRLAVQGAEIEARDVIVGAQKESCDEEWSVIDLKDEKCFVGKESSNLK
NKSKQGSAMKQIKGAASVFGFGSSSKNAKSKEEKGVTDPGGENVRPGDRIRSEVGLSTEN
PFWNSQFRERESETKSILMSESLPNESEKIDKQSGVDKAKRKPFKTLFQKEQKEGHGSSN
GDNGCGSEEIIKSGKKQWGFEGFMKWKRNDSDDETAPLALNERSNSGIYTGELVQSPVGE
GPDTKQIKRKLHPDGAPSDFFVDKVLGDNIKKKLSQIQSELGAKSHNDIALSDDHIEAIS
TRLPADKADLKQFFPK*

>g47181.t1
MVWPRLKLTFKKQSRFGKTHGDSLIRKSNIVNEEYKEAFRTNSFIEMHSKVQSQLGRKGL
DKLPSSPSLPQQLHFSPALLEPSQETLLDIIKASANDIHQFLASFFLITSEACKMCELIL
KSVHQTRANYSAMRRVLEHIRRKNDDQQDELYGKLASLALLRNPLSTISQVQFQDIHDNL
YPSLQRITSEGKKIRRRRKFIKCCKRFAGGTLIVAGCALTIALSIFVIHSVLGMVSAPGL
VACSLSLCMKWIKQTEPVLVKTTSLERFEAQLDTAAKGIYFIINDFGTTSRLMTRLYDEI
EHSKFILNLFLRRRSNEMVKEVVREFQINETGIINQLEELEENIYLCILNINRSRRQLVE
QMVIC*

>g41547.t1
MEKELKHFSHEQHPLTLLLGSQHKDEIVQKSTCYGCKNPVLLEPTYTCEKCIVFLHKECA
ELPREIKHPMHNYHPLVLLAKPPYESGRSGCEACRRSWSNFTYHCSSCEFDKDILCAFQD
RKFVHPSHKHALTLMQRPALFKCNACDEKLEDESYLCTTCPFWIHKSCGLLPKINQRKDH
DHPLSLAYCLPTEYRGYGFSCEICIDKLRPSSWVYYCRPCRYFVHIKCITAKTRQPDVGG
QEYYYKPKPKYVQLPNNNLVEVIQYYSGVVKKQYSKQDPEFPEIKIRSHKHTLALSHVQN
DSNTKQEDIICDGCIEPIASSYYKCGWCSFFLHVSCAQLPADFPNPGHYAGPEHKFKLFF
PKNTWRLSNATPAIRIAVDTLTSVRHVISLWISSVVVYEAQ*

>g31696.t1
MSLLQWLIITAALTWQSSLLAGGEYFKPFNVTYDHRALIIDGHRRMLISAGIHYPRATAE
MWPDLIAKSKEGGADVIETYAFWNGHEPIRGQYNFEGRYDIVKFAKLVGSSGLYLLLRIG
PYVCAEWNFGGFPVWLRDVPSIEFRTDNAPFKEEMQRFVKKIVDLMRAESLFSWQGGPII
MLQIENEYGNIESSFGAKGKAYLKWAAEMAIGLGAGVPWVMCKQVDAPGNIIDACNGYYC
DGYRPNSQNKPVIWTENWDGWYTSWGGRIPHRPVEDIAFAVARFFQRGGSLMNYYMFFGG
TNFGRTSGGPNQITSYDYDAPIDEYGLLSQPKWGHLKDLHAAIKLCEPALAAADSSQYIK
LGSMQEAHVYYGNVSSHGQNISSYQICSAFLANIDEHKSASVKFLGQVYTLPPWSVSILP
DCRNIAFNTAKVGAQTSIKTIGFDIPILEDGSLLPQLVIQEKVTNISQSWMSLKEPVGVW
GDNNFTFQGILEHLNVTKDLSDYLWYTTRIYISDEDVLFWEENEVRPSINIDSMRDMVRI
FVNGELIGICFYQLYFLLCLHKRVTFSMGLFLGPRLLNIDLCGPKFLHAYISVGL*

>novel_model_233_5bbde669
MVDPRWITVVIVLTCLVGVIDASAGDADPLYRNCVGECETTGCVRERCFTNCKFPLNGSS
IDGPWYMQEPLYLRWKQWDCQSDCCYHCMVEREKERKAVNQGPVKYHGKWPFQRLYGFQE
PVSVAFSALNLAMHFYGWLSFFILLHYKLPLKQDKQPYYDFTGLWHIYALLSMNSWFWSA
VFHSRDVVLTERLDYSSAVALLGYSLILAILRSFNVRDEAGRVMVAAPLLAFITTHILYL
NNYKMDYGWNMQVCVVIGVTQLIVWAVWAGVTHHPSRWKLWIVVVGGGLAMLLEIYDFPP
YKGFLDAHALWHATTIPLTFIWWSFIRDDAEFRTSNLVKKVK*

>g18998.t1
MPSPSASRLVFTSMATPKFLVYFLFLCLIFSKSTATKLSDSEVSDDSSLKKQLDKLKSKI
SVLESSIDEKAQELKSKEEIIKELEKISEEKSTTLASLQSEMLLLKDKISLNAKEHVGET
DAHATQLQEQINKLKKEMEAQNKKKDVLEDSANGTGKRIHDLSLKLENLHRTNNEQKFRI
HKTQRALQVAEEELMKAKVEASFVSNRLTKVREAWIPPWLSVHFAYCQSFVMNHWNKHGK
PALDLTVKKALETKSEFDKWVEPHIDTFKSKWIPVLKRHYLAFISDFGLHLQSLTTNAIE
TYHTSKKTIEPQIQRLQKVLDPYFQEAQNFLKPYVDQASSVMKPHVDKARVFLKPYTKKM
IRSYKKFVKNVSIYHRQVSKFLFLSLLPFVSFFPHSERVA*

>g54873.t1
MWFQRTLVEVEECWLKKKGLDGTDAYRYFVLKAQKIALSYGYEIINWLRGGVVQQAVAAG
FRCIVSNQESWYLDNLGTTWQDFYTNEPLFNITKPEQQALVLGGEVCMWGERVDGSDIEQ
TIWPRAAAAAGILSSSKS*

>g63457.t1
MSIPGIQGQLLEVTVVGCNKLKDTEWISRQDPYVCLEYASTKYRTRTCTDGGKNPTFQEK
FVFTLIEGLRELNVSVWNSNTVTYDDFIGSGKVQLQKVLSQGFDDSPWPLQTKTGRHAGE
VRLILHYANAIKPATTYASSAPPYMAPPVPQSSSYSAPPPSVGSHLPGLPPTAYTAPASY
STYPPNPAAYPPPPYHQPPPAAYPAPYGAPSAYPAPPYPPPPHDPSHNPTVHILVAISVA
ALVSCIVIADALGFAFETSTYNRSKDIQTGLY*

>g66240.t1
MEDMCILSEEEQYQQCNMSPEGNEALWKACAGPSADLPRLGEHVYYFPQGNWEQLDESSK
VELDQNITFRNLPPKICCQVSNIQLQAEKETDEVYAQITLVPHKSVPELKSPQHLPDSPK
PRFNSFSKVLAASDTNGSPPRHLFTAGWSKFVTSKRLVPGDSFVFLRGENGELRVGVRRR
IYESIVKPSLANPSDKAQVLSASYAMATGSLFTVIYRPRKSQFVVGLNKYLQAVKSNFSS
GMIFKMQLKGEDSVERECIGKISGIEDISPRWKNSEWRNLKVQWDGSTRGTLPERVSSWE
IEPVLAPPTSLVQIGGKKKRHMTFSPVSKRKSSKIEVQNKHMELQAMLEEPTQPPVASSE
AIGEKFHDIPVTFPTEGCEILNLEEDVQGLNNAATYLDNNPATYGREVSSNYGITHPSSI
EEGVGARKQFEGINVTDISHAVRSGSSPTSEGSDTWLNSILQDDHEQVECQREAPPLGQQ
SQDPSVLPQGTSLTGLESFPMVTQISSIQTQIPFFGSGNSNELVNWEGYSVTPRCVPILD
RITKRYPNTLSSFRLSTRTFQSVSLEMLAEVVITLERLTVENMNEERLDDVKRHLVDLKI
NGIDMPWLERRLEHIVRVTKKNVLTGRREELARKVDEASATIRQLKEELSSVDMELEKVS
SLIDAEPLLSANHSVIRGLL*

>g64714.t1
MASAFVDGALQDLKLFDNNCSFRYFRVSNLRLCLRNLTTFLLYARDGSSSTGGPMGPFFS
RLEDSLIQNGKDFHNLCLRGKDAKCRGDLFQMANQLTNCIESLSQEIMESYNTLSDYWSR
QSRYPSKEFLRSLIGSTPTIDKIMVILEDEENKIIQHLTGGSNKLDIISIVGMPGLGKTT
LARSVYDNPSVRSRFHTSAWCVVSQAYKKKDLLLQILNSVDPAFSGHEYSQENELEEKLR
KSLLRKRYLIILDDVWDIQAWSALKRSFPDNANSSRILLTSRHSEVAKKINPDSEPHPLR
RLENKECLDLLQKKLHCIKSYPLVLMEIANACRGLPLTVVIVAGILANSDQNSWEGIAKR
LSSSALSDNDQCMDILELSFIKLHKNLKSCLLYFGLFPEDQEISVRDLIWFWIAEGFIEK
SEHKSLKDVAMDYMNDLISRSLVMGICFEEDTWDMNEEWEFPNLTFLELNSIRIHRWTGI
DDVDNFPLLEKLVLQECDELKEVPSCLSCSTTLQMIKLINCPKSVVRLIMQIKEDQKDNL
GTEDLQVLVRESWLWKMMKSLEEDEPSEEEMMEDEPSEDAMEDDLSEDEMED*

>g32441.t1
MGRPRKLRELSGILKDKASLIKATLTTKRTISSIKVAVLRATTHNSTSSPPEHRLDTILS
LGQDIRPGACACIEVILDRLHNTQSPCVALKCLFILHNIIANGSFIFKEQFSFYPLTGGQ
NSLKLSRFRNKSNGENLDLSQWVRWYASVLERNLITSRNLGCFFSSNSSISSKFQQSKDK
EDVGKSSDLELLKEIDSLVCVVEGICAAPESLHYQKLDLVHELVLLVSQDYRCAQYYIMT
RLNEFGDRIMRLSHDDSTELINCLRRLEDCRMRLVEMFANRKRNEAFWDLVSQVRMKLEE
LNEERERGRMVVWKGREEMAELTRFGGRARGTSQVTNLLPCRSQWSGMDRVQITVSAAFV
*

>g50573.t1
MEMDSTQELNSVNAAPENPSITSMTISSPSTNTSTTMMMITSPSGSSSLASPSSTLSRYE
NQKRRDWNTFGQYLRNHRPPLSLSRCSGAHVLEFLRYLDQFGKTKVHTQLCPFFGHPNPP
APCPCPLRQAWGSLDALIGRLRAAYEENGGKPETNPFGARAVRLYLREVRDSQAKARGIS
YEKKKRKRPQQQQQQQQQQALPPPNSS*

>g70685.t1
MVNEAYWFWQMHHVNELLSSALPMMMMIMNENRKRTVRAVKTSALPGEVFQHRCILEFIM
EKQNAELFWENCRIMLENEKLRKKAQQLRQENQILAAEMKQWREADNSAPRPGLKNNAAS
SSSTNQRNFKKSGEKKI*

>g36309.t1
MERGINNKKKNKKKEKLLLQSSDECPKPLQDFNRIPRRSNTTNNFSSICSSSKNSSDSIE
ASKCCLGFLLSSANSNPSSSSSKSHLQRKPKSFSKITNKPLLDKTPKSAPNSTRPRSKPS
RENDFPIPSSQNSKKNPSFLSHWHSGKKSTSKTFQRSKLSSALVKNMENPASGSERFGVN
QKQRNQESRGLGEPRDFNFNVPVADNLDNVENFTPAGKLTCGPSFNDAIVDDKPGEEDSN
SANSTVVKTPPIEASVSPEVQCGSSNIVLSSTVTPVCYGAGHLISGVTDKRKCKPRGILT
VGGPMFSSGCGRFSVCEDYSNENAPEVLTQSRTSLIPLPAEASMRWLLPSQGKEDDIKKD
DNVSAYRSFMDSVSVCVSSSPSSCCQFTSDLVSDSGDRDGVYSPDAITSTGKTRIVLLSP
KRIPNFQGFSETLCGKYGDSSITAQARSSCKTDKMQKGGDSSRGSIGEKTQSSVDPLSSS
NILRTPTSDSSQERHVGISWIDEDACQRNDNLELCSVADVFPRTSISPRSQMPMVDPPGL
SSQFTNLTSSSHSIDHIQLQKNLNNCASWISDSTVGNMSLSQMRISWREGLVSQICDFDE
LDCCRCLSDEENNGERSDEFQHKSPKAFRTREHNSFRNTDVRSPEFLEEEPKILRQGKKA
LSPVRPNICAESICTDAGGLIGSEDLDWALCYKNQLFEI*

>g62039.t1
MDYERIQKSPQQQKQLSPGKLRTMILGAGAEKKRKQGEEDEELESTSLSIRSQDFEIHDS
GAINCKCCKDVDVVSVSPEYSTLATPDSSAKFEISHDHSVKDHSVTGSRIRSVDDSSLHH
DSGIESMSVSSSVFEFQKADHRTPQRVPLAPFSKPAPSKWDDAQKWIASPTSNQMKNGQA
NQGIGLRKFNHFGNGSRQSSSKAVVEVPDQRMVLYEEPDTKRIDSSQAKKESGVQKSASW
DAYQCTSESYCKPVLMIENCIGESAINLSRHDSSLSIHSATTFVPPPSTARSVSMRDMGT
EMTPIASQEPSRTGTPVRATTPTRSPSSSRPSTPGRAAPAPSPVDPLNECLDPDRKEWAE
KELQMKTRREIMVLGTQLGKMNIAAWASKDDENKEASGSVKTVATEQSSKSVTQTRAAAW
EEAEKAKYTASSCCQVEVERMKARAQEKLMSKLATVQNKAEEKHAAAEAKRNHCAAKTEQ
QAEYIRRTGRIPSTFSCCQWCF*

>g13944.t1
MDPCPFVRLTVANLALKIPVASKPARSVVHPSSSPCFCKIKLKNFPPQTSAVPYIIPEPV
SPDGGASQVQNKLAATFHLSKSDLDNFAGKSLFSSATKKLHLKISIYTGRRGTTCGVNSG
RLLGKITVPLDLEGTETRAVIFHNGWINVGKESKNSSAQFYLNVKSEPDPRFVFQFDGEP
ECSPQVFQIQGNIRQPVFTCKFSFRSTPDRNQRSRSLPAEQSCSRNWLSSYGSERERPGK
ERKGWSITVHDLSGSPVAAASMITPFVASPGSDRVSRSNPGSWLILRPGNGTWKPWGRLE
AWRERGSSDGLGYRFELIPDSAAAAGLVLAESTLSSSKGGKFIIDMGSPNGRVTLGNGNG
NATSPACSPRSSGDFGYGLWPYCMNRYRGFVMSAGVAGEANSKSKCNKPMVEVSVQHVSC
TEDAAAFVALSAAIDLSMDACRLFSQKLRKELCPPQDLLSS*

>g43101.t1
MSSTFSGDETAPFFGFLGAAAALVFSCMGAAYGTAKSGVGVASMGVMRPELVMKSIVPVV
MAGVLGIYGLIIAVIISTGINPKTKAYYLFDGYAHLSSGLACGLAGLSAGMAIGIVGDAG
VRANAQQPKLFVGMILILIFAEALALYGLIVGIILSSRAGQSRAD*

>g71627.t1
MESTDSSTGSQQPQLPPGFRFHPTDEELVVHYLKKKAASAPLPVSIIAEVDLYKFDPWEL
PAKATFGEQEWYFFSPRDRKYPNGARPNRAATSGYWKATGTDKPVLTSGGTQKVGVKKAL
VFYGGKPPKGIKTNWIMHEYRLADNKTSTKPPGCDIGNKKGSLRLDDWVLCRIYKKSNTP
RPMDHDKDDLNDVMPSIPQSLSPSIPMAQQRFQGLKASNYGTLLENEQNMFEGMMSNDGS
ISQLNSSGSRTQLAIATASASNVLPAKRTLTNLYWNDEGTTNSPPTKRFLADSTEGSIAR
TNDENSSIATLLSQLPQTSSLHQQTMLGTIGDGVFRQPFQVTGMNWYS*

>g51203.t1.1.5bbdf941
MVVLTAREEKRGTEAVQSLKDAGLSDNVIFHQLDVLDHLSIASLADFLMARFRKLDILVN
NAAIVGVVVNNNALVPSAKHVPGEFINWNEVSTQTYDSAEECLQTNYYGAKRTIEAFVPL
LQLSDSGRIVNVSSSSGKIKFVANKWAQAVLSDVDSLTEDRVDEVLNEYLKDFKEDLLEA
KGWPSFLSAYTLSKAALNAYSRILTKKYPEVMINCVCPGYVKTDINFHRGVLSVEEGAES
PVWLALLPEGGPTGVFFSQKNVSRY*

>g3150.t1.3.5bbdf941
MLRISRIKDLLLLLSALLIFHLFFLLHQHNPYDFPPPPPPPPPPPPSTTSLSLSHHLLFS
ISSSSTSLPRRTPYIHLWFSPNSTPHTYLFLDKRPLPHSMPPSPLTLPSIFLSSDTSQFP
YTFPRGSPSAIRIAYTAKDVFTFLNPSPRIRWFIFCDDDTVFFPRNLGLVLAKYDHNQWY
YIGFGSENYEQNQKFSFDMAFGGGGFALSAPLARVLAGVLDSCLMRYPHFYGSDQRIFAC
LAELGVPLTREPGFHQIDVRGDLFGLLAAHPLSPILSLHHMDAADAIFPGMSRIQALEHL
FKAVNADSLRILQQSVCHDPFNSLTISVSWGFAVQVFEGNQLLPDLISVERTFRPWSRSK
NVYSSQFMFNLRETPRDQCKRPVVFFLDSVASDERSVWTNYTKHNKGSCVRSNAIQKLEN
VRVFSKILDYDIEQIRAPRRQCCDILSSMNETMTINVRQCRNGEVISIPV*

>g61396.t1
MALILHASNTNKNAFKILIAAEYSEVNVELSKDFQMGVTNKTPEFLKMNPIGKVPVLETP
DGPIFESNAIARYVTKLKADNPLFGSSLIEYARIEQWIDQATTEIDACIGRWLYPRLGFV
PFLPPAEEAAITQLKRALGALNTHLASNTYLVGDFVTLADIILTCNLYLGFKTLMTKSFT
SEFPHVERYFWTLVNQPKFHKILGEVKQTESVLPVASKKPAQPKEPAKPKAKEEPKKEAK
KEAKKEEAKPKDDLEEEAPKPKAKNPLDLLPPSKMILDEWKRLYSNTKTNFREVAIKGFW
DMYDPEGYSLWFCDYKYNDENTVSFVTLNKVGGFLQRMDLARKYAFGKMLVIGSEPPFKV
KGLWLFRGKEIPKFVMDEVYDMELYDWREADINDEAQKERVNQMIEDCEPFEGEPLLDAK
CFK*

>g23354.t1
MAEVGDGGGESQMNKPGIRLFGATIAVQVRQTKDEEIKSEQTVDKRPDKIIPCPRCKSME
TKFCYFNNYNVNQPRHFCKNCQRYWTAGGALRNVPVGAGRRKSKPPGRVLAGLSDGCLID
ASGVHQFEFNHGVLEWHVAEQGDFQHIFPAKRRRNTSSSSQPCTSSTLPCS*

>g63990.t1.2.5bbdf939
MSSSESKLVVPTICERSSISELISFVRSSFRQEEYDEVERLLISREEKSEMELRILKRDY
ESMKKDRDLLEEKHGLVELENLEIKEELEKLRFECEELKREKRATEEMVAHRDSQLMDFD
IRVSSLEEAIAHLLRVDVVVIRSGAYRLRERKDVEFLVNGVKVPVSEGKNEGLDMETLLN
GVNDDVKGEYGGFSPETTGTQGPDLLVEDLNDKELLRTKVGMMNRHNVVPNSQNVQDACD
TSQVGTYGFSQEKENNAPIKAALASADCACDDEMGVHSSSLATASCIPVSKTPGSLIVVE
VSDSDEESRPAGSANLPGFCAAEVGSTGKEMPHINSEKSACSVKIQEENGNDSITDSCIH
LSPKRKRSMTESNGTNFMVARRKTGDLGKLLNDGKGSLANHSSTMLDLKSVGSQELILPK
AGANGSLQVISRKLLLDDFDSDSDSDSDDEPCSDSYLERMLASLQKDREKKWKFAADMHS
ALDRDYELCMNAVCALYRKKISAEKSLTKSSLHTDLVFSHFDAMSGKQLAEFLIDGDPQY
RLKKSFSEVQQKDPILLSKCKDIAIQYCEKLFEIYHKAEDPFFRPKF*

>g28904.t1
MLGAGLQFNGSRNGEDRFYSAAGARRSRNQSQSLSQSQDYFRRAGSDVAVSHSRELPEAE
TPAGVVAVAGEGKMVAREVSPKAPLERSCNLERFLLSITPSVSAQYLSKTTMRGWSTCDM
ECKPYFVLGDLWDSFKEWSAYGAGVPLILNDSDSVVQYYVPYLSGIQLYGDLSRSLAKSR
QLGEDSDGDYFRDSCSDGSSDCEHERGSASYSRQQSNCDGQIVDSALRINQLSLRDHELS
YQEGFSSDESEPGSSQGCLLFEYLEHDHPYGREPLADKISQLALRFPGLKTLKSCDLLPS
SWISVAWYPIYRIPTGPTLRDLDACFLTFHSLHTSLTGSQIVPAPILTYPGELDGVPKIS
LPVFGLAHYKFKASLWIPNGGSERQLLNKLLHDAENRLSMLQVNHPDFLFFHRR*

>g66562.t1_g66563.t1_g66563.t1.1.5bbdf935
MKAVGKVGSFISKSVYTVSGPFHPFGGAVDIIVVEQQDGSFKSSPWYVRFGKFQGVLKAK
EKVVSISVNEVEADFHMYLDHKGEAYFLKELDIKKGDTLSPSSGEDTDGQSHERRPTKSK
SCNFDAYESESNAQIDLGSGNVISRTNSRRSRILGLFFGRKSMKKDNLLEEENDAGVLSS
EMLERAEIAADLLEVKWSTNLASPTRRKDNSSRLSHAKLEDNDRKDLTIKDGQNNVDPLI
YDNIVHNLDNSISHRVIGFADNEDSKSIPTKSETSIEKAGVEILCLTSEKVTETSTVEDD
DKPNLKSVHMSDYIGAADTDTNSSVIDVITEIASSESKIQDCTVLKECPGMKFQKEQVCG
ETLDGFNESSFPVEKKRDDRIPSFIHCETSVSSSLELDDLNKEFNGALCLSGGGCKHVYV
ETLQTTGVVCEVNLQPTSSLYTKKFSSTQELLGNKNDCIFSLDGKTTSSSSMENGFVTES
YSQMITVQPVYASAEDIESQNIVTISTFNKSTCHALIERTICEKDQISKCESPVKPVSGP
IQLNILASEISEEEQLLFGDFDDFKRSSGSHTKELVSPDCEKENDSPLFLAGTEEVNESL
IPGCVFGLSEGESILVKLKAISSHINIPAPSGSQSEEVSRIARSLPNMPVHNYDFLSNVK
AEAPTDNQLSENEQMAEDARSIEKLKNGLTNPAVDATDRKIGTEVEKDLPKMKVSKKKTW
SITPTSEQLASLNLKDGMNSVVFTFSTPMLGKQQVDARIYLWKWDARVVISDVDGTITRS
DLLGQVMPLVGVDWSQTGVAHLFSAIKENGYQLLFLSARAISQAYHTRQFLLNLKQDGKF
LPEGPVVISPDGLFPSLYREVVRRAPHEFKISCLEVIKALFPSGRNPFYAGFGNRDTDEI
SYLKVGIPKGKIFIINPKGEIVVNRRVDTKSYTSLHSLVHDMFPPMSSSEQEDFNSWNYW
KLPPPAIDI*

>g21981.t1.1.5bbdf93e
MAIDTSTENASLTTSPRISFSHDLCQTDEASVVEDKRCRLDSTLLDSNSDDFDFCISTNG
IEEAETTSAEELFLGGLIRPVQLQDRGSKQENLNEKETILTNIGTEHRNQSKSFWGIKRS
SSLHCENSHKKSSFWLLPLLTRSNSTGSVPNSKHGLRENQKQNSHSKQQKNLNGNMSTSA
SSAASFYVYPMSQKPPLRKNYLGSNGNGLRISPVINMPVPSSHISKGTANLLGLGSLFRN
GRDKKIKK*

>g22029.t1
MEPPSFVPTRFDIFEIYRRYCEITSPRTYDCGNEGCLQNEEYQNRRFSRDALIQLLKLVE
SLSQTRFSVFEEIYRLMLRIDLLADFSEFSRFYDFVFFICRENGQKNITVSRAVMGWRLV
LADWPFNCHLHVLPMQFYFCESDCSTLHEKNQWHNISADTWRQVLAFSRFVQDNLEGYDP
EGAWPVLIDDFVEHMYRMGCNDTRNSLCNCGDSDEQQFDDSLPGLNSLPGLKRKFCDKLQ
KEHESSDGYVNSNGISLSKRRQICYADVCVNGEKNSCGSAAADCMEIAEQNSQLGCSKCP
CAIEGYLSKDFAGLFSCRPLRSHRHMGVA*

>g33636.t1
MRFCAIQAEIPEVGFPKYDEGVKGCNDQQNIRRNDLEVTTRDLSEKLGEHIVSVAETLKP
VDEKIEDCSKSEDIAKDDTNAIESHKDDELTQYSASKSVDGITNTPGGLNLEKQEGSVGK
VVILRPSRTSGDEEINKLDKEEQNLLTTEKESSKDVSSTALGSRFKDKQKEEKVEEQENH
STRTSVMKLDGDENLSKKIENEDKIFHNQNQNSDLPITGQESGREIQVEIKELHHGKDSI
VFASEAGGESGEERKTSNECEGTSSSIKADLIPEVKVKERPTEKISAKAECSEDKGQVDT
SIKEIAQKDELADLIQVTNNSENINMPCKSSIAMSDLEIMAKEDPETDSESQILSARKKI
SQVQEGLRGETLQPETEELKPGDASQAVAEAVRTEYGEKEQLNDDCNIQTENLGSAVLEE
NSPSELEQSSQKTPQEQEDEEAQDQQKNINDSRVEIARNEGPLDASSQMDTNLPLDMQKL
ELAPCCEFDKQVEEADPNDSSTDTKDLPEVQQKAIAESFSAGGENQEPVKCNEDKETEEA
TGKSILEEKSTTSPPELLEVPRNEISQVPGDFNSESKQTIQREEMKDGKMRTCDLEVPNT
DEDRDGEGEGNKQQRAESGYDHPVLVETSRDINVKASPKKSHNILSGVGSKVKHSISKVK
KAITGKSSHPKTSSPK*

>g64707.t1.3.5bbdf936
MEDHCHSRSHPQPIQVQIHLPQNVEEMINRICTEKHHDPPDAFARQRLAEAGEEAALDAV
RRIYNTPNPIRNLRAYILYLVNKSTSPSPTPLKRPSPSSPCASPISASPTKKDGEGSGYK
VLEHHVGSPSSSSSVAKRSNISRQLQFSSEPDYSERTTPQTFSYQRTVLSRKLEYRKLFL
IYSYIGRRKLEDVVSDEDADQILELNDLPMGDFESRIWNAYGKRYVPDDRRQSTEWDSGK
THLYYCNVYHDGSHCFKGPYLDTATTHLQRTLGDENVLIVKFVEDARCCIDRIFKEGILV
GLRPYHFFVFKDENRRLNKEKEMEMDKTPLSPAVRCYFVNFDSIAARGVIKSYTLCPSKI
NEARCHFMHIHMVSSLAKYMARFSLILSKTIKFPVDLSSVLIERIQDIPCRDENGHDIHG
EDGELLILTDGTGFISEDLALKCPQNFRSAKLVKDNDFEKICDHLEFEDVPCGGRVEEWN
REPPLLMQCRLFSKGLAIKGTLLVNRKLGAGKIQIRPSMVKVERDMRRTVTSTFDSLEIV
AVRCQLSKVLIALLSYGGVPRSFFLDTMRNALEETQAVFSNLNAALKVSIRNGESDDNGM
TARMISAGVPLSEPHLRDRLAKLANFERNSLKEGKLPISESFYLMGTADPTGLLKANEVC
VILENGQVSGKVLVYRNPGLHFGDIHVLDAVYVKELEEIIGNAKFGIFFSTKGQRSVATE
IANGDFDGDMYWVSRNPQLLKYFRASEPWSRLYSTPPAESRKPMELSAEEIEYELFQLFL
DKLKPSFNMAVAADSWLAFMDRLLVLGDEDANEIEGLRQKMLKLVDIYYDALDAPKSGKK
VTIPEDLIAERYPHYMGKGRSYQSTSVLGDIFDKIQQFQSEKHSVGEISKLPCFSSDIPE
KYLNLWKMRYNEYRYEMQEVLEENSKDLKNIAANDVIKKYKQLLYQAAELRESRKDIEEI
YNEALAIYHVCYDHAMSQGCVSRCGFAWRVAGSTLCKLHAIRSSMNEDPILIVPSVLRNA
LF*

>g34558.t1
MDNDQQNPGLETPLLSASQEKSIELKELFSKDNVVEEVKKQLWLAGPLMFVNLLLTLIQT
ISVMFVGHVGELALSGASMATSFASVTGFSLLIGLVGALDTFCGQAYGAKQYHMLGIHTQ
RAMFVLLLVCIPVAAVWANAGHILAFFRQDPEISAEAGIYARYMIPTIFPYALLQCQFKF
LQTQNIVIPMMLTSGITTVLHIPLCWILVSRFGLGNKGAALANAISYWINDLFLALYVKF
LPSCKSTWTGFSKEALNDIPKFLRIAVPSAIMICLEIWSFEMMVLLAGLLPNPKLEASVL
SICVRVANELGAGRPLAARLAVWVAIVMVAFESIVVAVIMILGRRIWGYCFSSEGRVVKY
VAQMMLLLAITHLLDGIQSVLNGIARGCGWQKIGAIINLGAYYLIGIPLGILLAFVYHTG
GKGLWTGIIVAVFSQTIFLSITTVCTNWQKEAKKASARVLDSLITSDQASQY*

>g63586.t1
MREILHIQGGQCGNQIGAKFWEVVCAEHGIDATGRYQGDSDLQLERINVYYNEASCGRFV
PRAVLMDLEPGTMDSVRSGPHGQIFRPDNFVFGQSGAGNNWAKGHYTEGAELIDSVLDVV
RKEAENCDCLQGFQVCHSLGGGTGSGMGTLLISKIREEYPDRMMLTFSVFPSPKVSDTVV
EPYNATLSVHQLVENADECMVLDNEALYDICFRTLKLTTPSFGDLNHLISATMSGVTCCL
RFPGQLNSDLRKLAVNLIPFPRLHFFMVGFAPLTSRGSQQYRALTVPELTQQMWDAKNMM
CAADPRHGRYLTASAMFRGKMSTKEVDEQMLNVQNKNSSYFVEWIPNNVKSTVCDIPPTG
LKMASTFIGNSTSIQEMFRRVSEQFTAMFRRKAFLHWYTGEGMDEMEFTEAESNMNDLVS
EYQQYQDATADEEGEYEDEEEAYQD*

>g75182.t1
MAKHIHHHLPTKIPLNNPHCKLLCSRSSPLPIRIETASPSSISDDGAVTAKENLQEQLRN
LRILLQQNRTETAKRQLKTLIDSHSVSQLYTLFSSSSSPPPTKPMFYNMLLSLYADSKLP
NEATELYNLIRDDGSFPSLSAFNLFLESLVTSNQYKKALEVFSYAVNSGVRVDKFSYGKA
IQSAVKLGDLKGGLEKMRSMKKCGLKPNGFVYNVLIGGLCKERRVDDARKLFDEMVKRRV
VPDRVTYNSLIDGYCKAGNLEEAFDMREKMKNDNVKPNIVTFNTLLSGLCKAGRMDEANK
VLEEMEIHGFVLDGFTYSILFDGHSRSGNVDASLALYEEAVGKGVKLNEYTYSILLNGLC
KQGKMEKAQELLKKLMDNGLVPTNVIFNTIVNGHCREGNVEKALSTIGKMENVGVKPDCI
TFNTVINKFCDLSKMDDANEWVKKMTEKGICPNLQTYNILIEGYGRSCQFERCFQILEEM
ESNKLNPNVVSYGSFINCLCKDGRLLEAEVILRDMIGRSVLPNAQIYNVLIDGYCTRGKM
KDAFRLSDEMIKCEIAPTIVTYNTLINGLCKKGRVMEAEGLALQIKNKGLNPDVITYNSL
ISGYCNAGDTGKSMELYEKMKASGVTPTLSTYHPLIAKCRTEETGLMQVEKIVQEMSHMN
LIPDRVVYNELIYCYVEHGEVDKAFSLQNEMVERGISPDRMTYNGLIMGSFKQCKIEKAK
DLFDDMRACGLSPNAETYKTIIGGHCELKDFVGAYTWYRKMLENDLYPTAAICNELQSGL
REEGRLEEVQIICSEMNVKGVDEWSMNEDPSAVAKV*

>g22766.t1
MQLIFVGRRRDHPSKRPRSTQALPEPSPSEKPFFLERENCFPLLYLAEEKEVAMASLLPG
DPSHHGVYEAGIYKGSQDNAEDGGSRWYFSRKEIEENSPSRRDGIDLKKETYLRKSYCTF
LQDLGMRLKV*

>g70799.t1
MAKTFLSISAIILFITLLFLSSVLHPVKSQQFSRKLSKKEMGLKGEKLSHLHFYFHDIVS
GKKPTAVRIAQAAMTNSSATGFGLLAMIDDPLTEGPNLSSKLVGRAQGIYASAGQDELGL
MMVLNCVFVEGKYNGSTLSILGRNNVLSTIREMPIVGGSGLFRFARGYAQAKTHTFDVKT
GDAVVEYNVYVFHY*

>g5764.t1
MGVPETDPLSQLSLPPGFRFYPTDEELLVQYLCRKVAGHHFNLQIIGDVDLYKFDPWVLP
SKAIFGEKEWYFFSPRDRKYPNGSRPNRVAGSGYWKATGTDKVIMTEGRKVGIKKALVFY
VGKAPKGTKTNWIMHEFRLSEPPRKNGSVRLDDWVLCRIYKKNSSGGAKPISGLQIKEHS
HDSSASSSSQFDDVLESLPEIDDRCFALPRTNSLKNILHQDDQKINLQNLGSGSFDWATL
AGLNSVPEFVPGNQAHAQAVPAAADGRMNNNVVSSHNNNNNNGNVNAQNDMYVPSFTQIS
HVDEEVQSGLRTHRVENSGFFQQNPNAFAPQTFNNSVDPFGIRYPTRTGNMGFRP*

>g9237.t1.2.5bbdf933
MEGSSESGWQRSDSSRGLNSSSVLERSPRFPRADTIRSSEETSSEFGFRPGRKVRERIVL
PHTNQFKTYTRGSEDGIALEPIFRAIECNDISLRQWLDNPERTVDSLECLHIFTQIVDIV
NLAHSQGIVVHNVRPSCFVMSSLNRVSFIESASCSDSGSDSFEDGTNSQTAEFKGSSSPL
PKDMPERGSQLATESLQLEMNPSNASQIITDTRCFRSSSEQAEVATNDDQTDEKNHSFPM
KHILLMETNWYGSPEEVAGSPCSCASDIYRLGVLLFELFCPFSSAEEKSTTMSSLRHRVL
PPQLLLKWPKEASFCLWLLHPEPSSRPKMGELLQSEFLNAPRDNIEEREAAIEIREKIDE
QELLLEFLLLLKQRKQDAADHLHEMVSFLTSDVEEVTKLQMALRIKGGSSLDLVKDSASG
PPSANTVDDGDSGSSGSRKRCRPGLYTRSAEELDDPLEENNKSDVPSENQGSILSKSSRL
MKNFRKLESAYFLTRQRVLKPSGKVFARSTPISSDARGSIVVTERSTLSNLSSKEQYNED
RPSGWINSFLEGLGRYLSFSKLKVKADLKQGDLLNSSNLVCSLSFDRDGEFFATAGVNKK
IKVFEYNSILNEDRDIHYPVVEMASRSKLSSICWNGYIKSQIASSNFEGVVQVWDVTRNQ
IFREMREHERRVWSVDYSVADPTLLASGSDDGSVKLWNINQGVSVGSIKTKANVCCVQFP
LESGRCLAFGSADHKIYYYDLRNSKMPLCTLIGHNKTVSYIKFIDSTTLVSASTDNTLKL
WDLSVRTARVLDCPLQSFTGHLNVKVYFPLYCLRLHAILKFVAWSFN*

>g33802.t1
MLKEKHKFPRTIWCLILITTLFINHVFADDAAIMAELAKGFIKAPPGWSGNNPCKWTGVE
CDSSGRVISIDLTSKSLSGQLPSDLNQLSSLQSLDLQRNQLSGPLPSLSNLMSLKEVYLD
SNNFTSLPPDFLTGLTSLQTFSISENPNLPVWTIPKSLSDSTGLVNFIATKANIVGEIPD
IFGSFPSLQNLRLSYNNITGSLPLSFANSGIQNLWLNNQIVGLSGRIDVLGTMSQVTQVW
LHVNKFSGPIPDLSGCKSLFDLQLRDNLLTGVIPPTLSSLPKLSNVSLQNNDFQGPVPSF
PGGVHVNLGTTNSFCNTSPGPCDPQVTILLQVAGALNYPTELGQSWKGNNPCQNWQFITC
DTGSVSVINFGKQNFVGNISPAIANLTSLRTLDMHDNNLTGSIPASLTSLTKLKVLDVSN
NNLSGKIPEFAPSVTVKTSGNPFIGIVLSPSSPPGNVPGGNATPSSSPVNDKKPSVSPWI
IAVIVVAAVIIVAVLGFVVYRNYARKRTGKYMFAKGSENGKLSLKTDAEAISSDLNSQMG
NESRDFNVSEGISVAIPIEVLLEVTNNFSEENIVGEGGFGVVYKGQLHDGTQIAVKRMES
SLINKKGQGEFKAEIEVLSKVRHRNLVALHGFCVNGNERLLVYEYMPQGTLGQHLFSWQV
RGTSPLTWNQRVSIALDVARGVEYLHGLAQQSFIHRDLKPSNILLGDDMKAKVSDFGLVK
SAPDGKYSIETRLAGTFGYLAPEYAATGRVTTKIDVFAYGVILMELITGQKALDDAQPEE
RAHLVTWFRRVIVNKDEIRSSLDPSLKPDEETFKSICKVAELAAHCTAREPQQRPIMGHA
VNVLSPLVEQWMPCSRDEEENFGIDLNMSLPQALQRWKASEGKSTNSDLFTDTSREFNGT
PQVPSRYTSSFR*

>g73395.t1
MSLSAALFQPKNGVATTATTITTTVIKHRYISFLIWQSILSTISLILLKSLLLFPFRSKP
SSSIFLSLLSFLSFQVSLLFFSTCHFILSSPHPHKPASPLDLLLGLARLVFVPASNNANL
SPEARRAVWVSLSFVLFGAVSALSGFVSLVSICWSCGAFAQTRPWRVVITMLGFRGFWMG
LFYGVFYVYKRRWVLHFPIIQTPLFFSFKMGLPSAVGQAFKLSTAGYFFSSLIVFFFHDE
YENKVTMGKYIVQQIILYVGNFLVFLCWELSHHLHQVLHTKRFAFAPPKGSAAAETNPSE
YLLAALEESSPKSLLQYLAYLDLCMVCERNVDTWRRAAFFEETGETYKRVIAVCLRPLEE
FTLKLGGSLDSSSVQKSSQLSDQLRSPTDRLADSRIRESFNDFQLCAWCARIVASLTACS
RKEDRFGVAQLSGNNAAVISTLLSALIAVETFMGKKTTLPSSHHLMGAAGIKWAQMGSGI
RDSAVGLTEKRRGSPMYMQAYSMADILRTSMYCIVSAFHDEMLDSTKAGHLEKDWITSTK
ALYGTRELLSQKLRLFLDFQAC*

>g27217.t1
MMSRGATRVARLMIDHTGPRYFSSATVGPQYTNLGKVVVSGTTAFLHGNPLAVPSEKAVG
TSFRFRAMGLRSESTLALGEKKEEEENVLTGGPSATGGAVAPEGGNGRAIVSYWGVKPPK
VTKEDGTEWKWNCFKPWETYKADLNIDLNKKHKPVTFLDKVALRTVKALRWPTDLFFQRR
YGCRAMMLETVAAVPGMVGGMLLHCKSLRRFEHSGGWIKALLEEAENERMHLMTFMEVSD
PRWYERALVFAVQGVFFNAYFLTYLLSPKLAHRIVGYLEEEAIHSYTEFLKELDNGNIEN
VPAPAIAVDYWRLPPDSTLRDVVMVVRADEAHHRDVNHFASDIHCQGHELKEAPAPLNYH
*

>g62023.t1
MVFSETLQGILSRICEEEFDLGSPCTQRILIDILNLLFVPGFFIILIGGLMKKINIRLQR
GDWITTAISICCALTSIAYFSFGLLNLSGKSSEFNRRSWLSYLVRGLIWITLSISLITRG
SRWIKFLISAWWVVFFLLISALNIEVLVKTHHAEIIEIVAWLANFLLLCCSFRTFRLFIF
HPTLEKSTLLEPLLHKEVRGQNHFSLSKVSFFSKLTFSWINPLLCIGNTKTLALEDIPCL
GSEDEAMVDYEKFYKKWSSLQMERDSSKAQNLAFLAIARVYWKEMVLAATCALVRVVAVV
LAPLLLFAFVRYYNCETRSIHEGVILVASLVFVKVVESLFYRHLLFYSRTTGMKMRSALF
VAAYQKQLKLSSLGRQRHSTGEVVNYIAVDAYRMGEFPMWFHVGWSSGLQLLLAIVVLFV
VVGLGVLPGLVPLLICGIINVPFAKIIKKCQSEFMNAQDKRLRVLSEILNNMKIIKLQAW
EEKFKTLIESYRENEFKWLAESQCKKIYITLLFWMSPTVVSSVIFFGCILLKSAPLDAST
VFTILAALRSMSEPVRLIPEALSALMQVKVSLDRINTFLQEDESKQEDEVRSHLSELDLS
VHIQDGNFSWDPDSATLTIKNLNLDVEKGKKIAVCGPVGSGKSSLLYAILGEMPKMSGNV
NTDGSIAYVSQSSWIQSGTIRDNILFGEPMNKVKFEEAIRFSALDKDIESFDYGDLTEIG
QRGLNMSGGQKQRIQLARAIYRDADIYLLDDPFSAVDAHTAATLFKDCVMSALVNKTVIL
VTHQIEFLSEVDQILSLICSLYTKAIHLSSMEVMDGGQIIQSGSYKELLAARRAFEQLVV
AHRNAITLSNSLTKNKEEPLQANGDGLEVKEKSEGEISMIPGVQLTVEEEKETGDIGFKP
FLDYIYVSNGLLLLLSGAITAAGFFIFQAAASYWLAFTIQTVEINIVVIISVYALISTLS
AFFIYLRSLFAALLGLRASKAFFSGFTNSIFNAPMLFFDSTPVGRIFSRASTDFSVLDFD
IPFVYATVMVSGIEIVATIGVMASVTWQVLIVGILATVASKYIQGYYQASARELMRISGT
TKAPIINYASETALGVATIRAFNMSDQFFQNYLKLVDTDAKVFLFSNAAMEWLLLRTEAL
QNLTLFTAAFLLVLQPKGTISPGLVGLSISYAFSLTAAQVFFTRWYSTLANHIISIERIQ
QFMYIPPEPPAVVEDKRPPSSWPAKGRIELLDLKIRYRPNTPIVLKGITCTFREGTRTGV
VGRTGSGKTTLISALFRLVEPYSGKIILDGIDICSIGLKDLRLKLSIIPQEPTLFRGSIR
TNLDPLGIYSDEEIWKVLEKCQLKDAVSCLPHLLDSSVSDEGENWSMGQRQLFCLGRVLL
RRNRILVLDEATASIDSATDAILQKVIREEFSNCTVITVAHRIPTVIDSDTVMVLSFGKL
VEYDEPSKLMGTNSSFSKLVAEYWSSCRKNSHPKLNHYGY*

>g69645.t1
MMKFASFETIVEMIYKYGLPTPKNECSKPLQLGVSFAGGYVAGVFCAIVSHPADNLVSFL
NNAKGATVGDAVKKLGLWGLFTRGLPLRIVMIGTLTGAQWGIYDAFKVFVGLPTTGGVAP
AATPATELAKV*

>g36564.t1
MHSILPWDSWCAKLLYDLDLLDRLSQSLYIVLILGAYKRQVEVTNQQIDELKNELTNMII
YPNEAVAAKKEDESTRDATLVAKEEVIIRVDSLDTALKKEQDRSQKVKEEHLLAVEQI*

>g50293.t1
MGVIQTYITKKEGSLFSASLPNSFLESNTVFKASNSCSYSSYAICRFVLEILGDMFSTYA
LTSPKKLKAAELWKFTEDHREIYDFIGWIIAKAEWALLYLLAKDEDGFLSKEAVRDWF*

>g11253.t1.1.5bbdf936
MGYAQLVIGPAGSGKSTYCSSLYQHCETVGRQIHIVNLDPAAENFDYPVAMDIRELISLE
DVMEELGLGPNGGLIYCMEHLEENLDDWLSEELDNYMEDDYLVFDCPGQIELFSHVPVLK
NFVEHLKRKNFNVCAVYLLDSQFMTDVTKFISGCMASLSAMVQLELPHVNVLSKMDLVTN
KRDIENYLNPEPQTLLPELNRRMGPQFEKLNKSLIELVDQYSMVSFLPLDLRKESSLQYI
LSQIDISIQYGEDADVKIKDFDPDADD*

>g70015.t1
MSSLSLRVMELLGISLGVGPTHFRDFFAQNDSIMRLNYYPRCQKPDLTLGTGPHCDPTSL
TILHQDDVGGLEVYANGKWHSIPPDPQAFVVNIGDTFMALSNGIYKSCLHRAIVNSRTPR
KSLAFFLCPKMDKVVSPPKELVSSDNPRMFPDLTWSSLLEFTQKHYRADMKTLDAFVRWL
RHQSDSHDIAT*

>g40241.t1.5.5bbdf93a
MTMKGQQLLVSYCRVWGVGCSINFLVLFLVPFLVVLVLHYNKESMLLRHEAFVSSWAEKH
EALLFPSKENRAASEEIHGTLSISAKEIRGELLTPLEHNHGALPTSPSERNHGALLVSPP
KEDRAAPMISSEGNHEAHLTSPEGSDNAALLSSLVGKQGSLLSSLRGNHGGVLTNSSAQN
PGAILAPSVQNLPNSSGGLPINSSVQNQGAILTPPVEDLSNSSVQYHGSLVSSCNMFSGT
WVYDNKSLPLYKDWNCSFTHDGPACEKYGRKDLDYQYWRWQPDNCDLPKFDAKTLLEKLR
DKRLVFVGDSLNRNQWVSFVCLVESSIPPAFKSTHSFGNFGGFIAKEYNATIDFYWAPFL
VESNADNPRNHSFTSRILRIESIEKHGKHWSDADILVFNSYAWWKMNRLKVS*

>g20600.t1.3.5bbdf93c.2.5bbe1a02
MAEIQSSGRPIDQLLEKVLCMNILSSDYFRDLLRLKTYHEVIDEIYNQVDNVEPWMTGNC
RGPSTAFCLLYKFFTMKLTVKQMHGLLKHPDSPYIRAIGFLYLRYVADPKTLWSWYEPYL
KDDEQFAPGSNGRMTTIGVYVRDLLLGQYYFDTLFPRIPVPVLRSIVSNLEKMKLPTKHA
GTTGESTRGSDETARRPPSVKAALSVSFGQRAPHRASTRDSSPVRRTLLPPSYKRDNVDD
SRRSPSGRRSQSHELSDREYLDREHSRDRDRDRHREGERYRDRDRERERGRDRDRERRYD
YDRRSRESSRRDYEKSSHDGSRHYREGSSRRSRSRSRSQSRYERNQHVEYRSPPQDGSKD
KTSASSNLARLKDLYGDLSNQKEDAGKDRGPNRDSGTEEVIRLGGSSWR*

>g71657.t1
MYKPKEFLQGLIKPFVPKSSKGTKEEDLETIAAQDHKQFQFQVLVAATRNFHTNNKLGEG
GFGPVYKGRLDDGREIAVKKLSQHSKQGKKEFMTEAKLLARVQHKNVVNLLGYCVHGPEK
LLVYEFVVNESLDKLLFKSSGQDVLNWNRRHDIIMGVAKGLLYLHEDSRSCIIHRDIKAS
NILLDDKYTPKIADFGLARLFKEDETHVNTRAAGTNGYMAPEYVMHGTLSAKADVYSFGV
VILELISGQKNSTFNKDLESTSLLEWAYKLYKKGKSLDIMDPSLAPSANPGQISVCIQIG
LLCTQSDPRSRPDMRRVVVMLSKKPGTLEEPKRPGYPGSRYRRSHMSSAQSSITGTSSVS
SSRSFTSTSKTQSVTATTSASALINPRSDRKEKWPMHDYSDS*

>g51311.t1
MEKQLLAIMSKKSEILLSELRMLSTVGNYAFEITSKRGRSAPDFLKRFACILCECKSMHN
IGSDVEQINTDITNVASSLQSFGLVAGDKYSDARNERKNQLRQTYGHPMEEDFVGNKADI
DKLVKLIMPEEGDRDYRLISIYGMGGLEKTTIARKIYNHLVVRHVFQAFGWTRVTQECNP
RSLMQDVLKQLLANPERNEMIRGMRERELMEALYNVRKKKRSVSLFLMIFGIWMIGKSSV
RPLRVGRQIAKFCSVHVTRM*

>g13141.t1
MVLLSYILLILLLLIPVVHLCLQNLSLRKKLGIANGKFACQNQRLPPGRRGWPLVGESLE
YFTKIRQGVPYQFVKDRMNKYSSKVFSTSLIGQPMVILCSAEGNKFLFSNEKKLVQVWWP
STMDKIFPKSDDKPSSEHSRRLRKLLPFILKTDVLREYVGIMDAVMKKYLQTDWNCEELN
VSEKAKKYLLTLACNIFLGINDPKKIDELAKGTEDVGTGIHSMPFNLPGTALNRAIKASK
LMRKEVEAIVSQRRSDLSEQDPSSVKDFVSHMLLVKDDNGQLLSDGDIASHLVGLVQAGY
TTIHSTITIIMKYLAELPDVYNSVLKEQREIAIMKEENERLTWEDLWKMKHSWDVALEVL
RIYTPGTGSFREAIADFVFDGYTIPRGSKIHWIFDVTHKNPEYFHNPEKFNPSRFQGDGM
APYSFVPFGGGARMCPGNEYARVAILVFVHNVVSHFRWEKLIPEEKVTHYPVPRPAQGLP
IRLYPHKP*

>g44662.t1
MASKTLIFFCISLAIAVMITSEVAARELAETSTSVENSKTAETNGVEEDQYPGGGYGGYP
GGGYGGYPGGGYGGYPGGGYGGYPGGGYGGRGGYGGRGGYGGRGGYGGRGGYGGRGGYGG
CRFGCCGRSYYGGGCRCCSYPGQAVDAEPQN*

>g1629.t1
MGKITTLRDLIGAIKDKASLSKAALVSTPQTTTLRLAVLRATNHSSSTPPDDHHISALLS
LGDSSRSTASSLISSLIDRLHRTSDSTVALKCLLILHHIIERGPFILQDQLSIFPTAGGH
NYLKLSSFRDGATAFTWVLSAWVRWYARYVETLLSTSRVLGYFLGSTTCSLEKDEPEEII
SSFLNQDLIRDVDSLVGTVEEICKVPDPHFVEGNKLLYEVISLLNNDYLSTVNEILSRLS
EFNERLSCLSFGESVELVCALKRLEDCKEKLSLLFTVKKPSTDTLWGLVTELKAKIGKLK
VDKEEGKLLTWQKSEKASESARFVIKRDDSVLFSSGRLNMADKLSLLVVGES*

>g36014.t1
MIQYADVRGFKNFIVPFCMDFKFKLVVDSMAHASYLVTDGVKHPPFSKRKGQPVVEFIFA
ATEEAIFVHAVISAKHIRALSSGDIETTLKHSFDRFGDRLPVVVSPHGMLGKLTGCCTSD
LVKQVYLSSGKFKSSNEVVGLPYHASHGSGCQLRGQNCYAEITLGCPVAENDKILAQNSS
LRKNLPRHSVTESTSETKINQKGPLEPSRVFIYPAEAVVVPVMQTSFARSSLKRFWLQNW
IGPSLSASSFFMQCSDNKADSKDGSWLESNGLRSQHGYHSSSNSNNSSISSISGSSSDSD
YRTSGAGDLDADADSLTCIRSGLSSIDQLHTDSLKPGSKRVRSGVSESFNQAGAVINPST
SDYGSIEVNNSAIIGVSNDPIGWDWDDDDRGVGMDIQALLSEFGDFGDFFENDVLPFGEP
PGTAESQALVFSAQDCGDLGSSSSTSMMDVSDPVLLPVGFPSFDSFNSPPASVAMDDSLS
KNQEFTGTVSGSGPPASTSGEFDHVIKAEALMTFAPEYGAVETTSVEVSSSIFRSPYIPK
SRKAETENSSSNNYVYSATPPASPCVDDSGEKSGMTKNMKVCSGKQDKIAIPQSKKYYTH
IDGGIHKSNGRLSTCNDGTATHVPAVTPSSFGLNSLDAVKSLHSKGSDGLLRTESFLPSL
KPILATEVECLMCQAFMCRIRHTLISSSSHLPVGLTRLSLGTILNQPHVDPSILSDNLSS
KSELKKKETIPVRIAGDMDGGMLDGPLSAPVGVWRSVPKGAKSTNHGMELCQSIPHNSFV
EEKNLSYGLRQPLQELLDGLALLVQQGASFVDVALDSDCGDGVHGWLALQEQLRRGFSCG
PSMVHAGCGGVLSSCHSVDIAGVELVDPLSVDVQPSFTISLLQSDIKAALKTAFGTLDGP
LFVTDWCKGRSLSYEAGSMGDEFYAESTASASECQDSSNGARVEEASDRKSLQEACLSES
EQQTGSRLRPTLAVVPFPALLVGYQDDWLKTSASSLQLWEKAPLEPYATQKHMTYYVVCP
DIEPLTTAAADFFQQLGTVYETCNLGTHSPQSLGSEMELDSGKSSAPGFVLLDCPQSMKI
DSSSASILGSISDYFLSLSNGWDLASFLKSLSKVLRTLNLSSCMTTNTKEGNSGPYSQVI
YVVCPFPEPLSILRTVVESSIAVGSSILSSDKEKRSMMHNQVGKALNHSAAVDEALSNVL
TISGFSIPKLVLQIVTVDAIFRVTNPPLNELIVLKEIAFTVYNKARRVSRGTSGDMVPST
TSVSGRSNSVLMQMASPLPGIWKDCVGPRIAGSSLQRESELDASLRSSTWDSSWQTRAGG
LGCDPNRGGDFLIQDESRCMFEPLFILADPGSLERGVSPPVFGNLASESSKVLADDGTSG
SLIQSSASSGGGDSGPSSQLDSSELDGFGSGNQKTLPSLHCSYGWTEDWRWLVCVWTDSR
GELLDSHIYPFGGISSRQDTKGLQSLFVQILQQGCQILQACSPDIGKPRDFVIARIGCFF
ELECQEWQKALYSIGGSEVKKWSLQLRRSVPDGMPPNSNGTSIQQQEMSLLQERTLPSSP
SPLYSPHPKSSAFMKSGLGQPANRKQLMGGVDSSRGLLQWVQSISFISLSVDHSLQLVFQ
ADSLASGSTQSNGFLNQPSYLEGYTPVRSLGLTSASYVLIPSPSIRFLPPAPLQLPTCLT
AESPPLAHLLHSKGSAIPLCTGFVVSKAVPSMRKDSKSISKEEWPSVLSVSLVDYYGGNN
IAQDKIVKGMGKLGGRGLSSEAREFELDTHLVLESVAAELHALSWMTVSPAYLERRSALP
FHCDMVLRLRRLLHFADKELSRQPEQSQS*

>g18135.t1
MPKMAKTAPFFFLFSLVFSSAFSRTLPPSSKTNVLDISSSIQKTLDVFSVSSQANNSLES
QGYTSSSLSLELHSRVALRKTSHADYKLLTLARLGRDVARVNSLQTRLDLAVHGTSETQF
DAEALGGPVISGTSHGSGEYFGRVGIGLPPRQLYMVLDTGSDVNWVQCAACDNCYQQADP
IYQPASSSSFSRLACETQQCRSLDVRGCNSGTCRYEVHYGDGSYTIGDFVTETISFGGSD
SVNDIAMGCGHDNEGLFFGAGGLIGLGGGPLSFPSQINAMSFSYCLVDRDSSASSTLDFD
SVIPTDAVSAPLLRNPRLDTFYYVDLTGISVAGELVSIPPSIFKLNEFGEGGVIIDSGTV
VTRLQTEAYNAVRDAFAEGTQNWPSTNGVALFDTCYDLGTRNSAECPTVSFHFSNGEQLA
LPAKNCLIPVDSSGTFCFAFAPTSSSLNIIGNVQQQGTRVTYDLAHSQIAFSSNNC*

>g19964.t1
MDTASFILHLVLLLCLPTISLARTTNILSDQSALLALKSHITFDPSDVLSKSWTTQIPVC
NWTGVTCSSRHQRVVALNISNLGLQGSIPPQVGNLSFLNSINIRGNNFQGNLPVEMLHLQ
RLNYINLNVNNFSGKVPSWFGFLPNLQYLYLENNSFTGSLPSSLFNASKLEDLRIPYNNL
EGNIPEEVGNLGNLNVLNLQGNQLTGSIPRTIFNISSLQAIALTYNSLSGYLPVNICSKI
TNLQAIYLSKNELSGQIQSRFNNCSELQILSLSFNNFSGQIPREIGNLTMLSGLHCGYNK
FEGAMPPEIGNLLNLQVLHIAECFLNGPVPAEIGNLQKLMTLQFTSNFLSGPVPESIFNI
SSLKTISFTLNCLSGSLPPHIGQQLPNLENLLFGGNRLSGAILESISNLTKLTNLELGQN
QFTGSIPTSLGNLRYLELFQINGNHFTSDSDSELSFLTSLTNCKSLRVLGISDNPLHGAI
PHTIGNFSSTFERFNASLCGIEGNMPHEIGNLSGLSALSLGDNNLAGPLPATLKGLSNLQ
GLDLQGNRIHGSIPNYFCSLRDLTVVQLSRNQFTGQVPECIGNMTSLRHLYLHSNRLNST
IPATLGSLKDLLYLDISSNSFLGNIPSEIGNLKSALSIDFSENEFSGNIPTTLGGLQNLI
NLSLAHNALQGPIPETFGNLLSIQLLDLSGNNLIDEIPTSLESLLQLKYFNVSFNDLQGK
IPTNGPFVNFTYESFMSNEALCGGPPQLHFPPCAMHSPRRSKTKRLHLVQEFNFVLSVTR
DLI*

>g69559.t1.3.5bbdf936
MNLQAHMSGQLSGQVPNQSGPSLPGVSQQNGPVQMQNPVAHRNLLNMDPEFTRVRNLMQH
KIYEYLVQRLQHAHEMPQRRVLDIVKRLEEALFKTAATKEEYMNISTLENRLHVLIERLP
LSNQNHQFSHANASTSIGAMIPTPGMPQSGNSNLIGTSSVDNGNSCNSIASSTINSGNFL
ASHGSSMNSAHGGSFSSSDGPSSNGYQQSPSNFAISSAGNNMVSSFGAQRMQKQHVGGQN
SRILHNLGSHMGGGIRSGMQQKSYGLSNGALNGVGMMGSNLHVMNGPGTTEGHMTGTMYG
NSPKPLQPTLDPTQRTLMQGDGYGISAADSSGSGNLFVPVTSVSLTMNNQNLNAVTLQSR
PKTSSSLLSNQTHLHNSQQVASIKPHSIDPMENNFQSQNSLSENLVRSHPQQQFQQQPHQ
FQKAQMVQHQLQQKQQIQQHQLLAKNDAFGRSQLSSGLGASIKTEPGIERSEEALHSQVP
EQFQFSELPNQFAESSLEDHSRAGTQLHSFPSGPQDIYASLTQTSEQMQHLVHQNQFVAD
SQSEFSCLPPAVQSDAAAQGHIWYPESQDRSQNPGCLPREQNVQEEFRQRIAGKDEAQQN
SLSSDGSVIGQSVAAMRLDKPANLSGAAGRSGNLSRERQFKNQQRWLLFLRHARRCPAKE
GKCLDPYCIYVQELLRHMEKCESLQCSFPRCCATKILISHHKRCKDASCPVCIPVKNFVQ
AQLKASSWPRFGSDLVRSVNGSCKPYDTGENPGRLTLKTIVETPEDLQPSLKRIKTEQSS
QSMVHEIESSVVPVPTISEPQPCDDRQQTEQIVNTIPMKSEVVEVKMEGSMNVGQRSPKS
IVLKKDNVDDSFMQRTDADLIISNVPAVVAKQPSIKIEKEVEQTKEETTLLPADSAGASK
SGKPKIKGVSLTELFTPEQVREHIKGLRRWVGQSKAKAEKNQAMEQSMSENSCQLCAVEK
LTFEPPPIYCTPCGARIKRNAMYYTIGTGDTRHYFCIPCYNEARGDTIIADGSAIPKARL
EKKKNDEETEEWWVQCDKCEAWQHQICALFNGRRNDGGQAEYTCPNCYISEVERGERMPL
PQSAVLGAKDLPRTILSDHIEMRLARRLKHERQERASAQGKNVDEVPGAEGLVVRVVSSV
DKKLDVKPRFLEIFQEENYPLEFPYKSKVLLLFQKIEGVEVCLFGMYVQEFGSECQQPNH
RRVYLSYLDSVKYFRPEVKTVTGEALRTFVYHEILIGYLEYCKKRGFTSCYIWACPPLKG
EDYILYCHPEIQKTPKSDKLREWYLSMLRKATKENIVVDLTNLYDHFFVSTGECKAKVTA
ACLPYFDGDYWPGAAEDMIYQLQQEEDGRKQHKKGTLKKTITKRALKASGQTDLSGNASK
DLLLMRKLGETISPMKEDFIMVHLQHACTHCCILMVSGTRWVCSQCKNFQLCDRCYEAEE
KIEDRDRHPINQKDKHALYRVEINDVPADTKDKDEILESEFFDTRQAFLSLCQGNHYQYD
TLRRAKHSSMMVLYHLHNPTAPAFVTTCNVCHLDIEAGQGWRCETCPEYDVCNACYQKDG
GVDHPHKLTNHPSMAERDAQNKEARQMRVLQLRKMLDLLVHASQCRSPHCQYPNCRKVKG
LFRHGIHCKTRASGGCVLCKRMWYLLQLHARACKESECHVPRCRDLKEHLRRLQQQSDSR
RRAAVMEMMRQRAAEVAGNAG*

>g16625.t1
MEGVGGDSVSGAAASLNQRSLEVWKLFQYYLDKSTPHTSYRWIGTCVLFVLYALRVYFVQ
GFYIVTYGLGIYILNLLIGFLSPLVDPELEPSDGPLLPTKGSDEFKPFIRRLPEFKFWYA
ITKAFCVAFVMTFFSIFDVPVFWPILLCYWLVLFVLTMKRQIMHMIKYKYIPFNIGKQTY
TGKKPASGSSPRAD*

>g36778.t1
MNSCCWEWDNWVEEALSKLESLKVLRSLRPIHLIRSESLQTKSDELEFYDGLRQWDRASV
EVQISEPTFQKWLQDIPRDDVVTGNGENDDGAGACGGKFKKLLIFSGNDYLGLSSHPTVI
KAAVKAAQEHGMGPRGSALIRGYTNYHRLLESSLADLKKEEGQYRSRVNQCGWIWTDEFL
L*

>g67168.t1
MNCLRSIRVHTQSTSFDIEDICLVINNTGKDIKIDEFREVFGIEQPAEIHVGEGKPISKE
GYIKIKPSEFRKASSDSSRIRPYKLVSLIDGIKNSRGLKLSMEEIQTNTAFVISMGENNQ
LVKENRGIDRKDIKSEEDVKEFVVSIVVCWVVDYACIVFRICLNSIQT*

>g46310.t1
MRCKCVSKLWRSIIVDPSFARLYRGGFWGLLISEPYDWTNESRRDFYYLNLFDGPVKFLS
HHLSLDHNGKRMGCTDTVNGLLCFYSGKYSYLFNIATRERRKLPVSRHEANSCSYHLGFD
PISKLYKLLKICPIYEDYDGDHVFPEQHSKFVRNLECEILSLGVDSSWRNISSAPCEIAS
RSVCLNGVLYWKIILLLFILVKRSFNLFQELMILSTTVYCSLDLV*

>g74275.t1.2.5bbdf93c
MRQFLWKAHLQWIGSSILRHKSSQQTVARIFEALRTFATSDGNWKHSTSKSLQQQIVDSL
CFGDRSKASSLLSQLAHTDTGALPLKADDFLFILLYCARLPDPLFALETWKLMEEKEIYA
GGKCFFYTLRALCTGGYLKEAFNLMNLLQENPAIYPHLPVYNNFLSACVQIHTVNYANDC
LDLMEHRTVGKNEITYSQLLKLAVLQQNLPAVHEIWKECIKYYSLNIISLRKFVWSFTRL
RDLESAYLTLQYMVRMAFRGNFIINRSAEGKLTDSRLDIPMPSNNNLSLKSCSKDNGIVT
SVSEYLDKMDINTSKGKCNFSYGMEIHGVSMVSKGMPVKHVHLPVMKLLRWSFSDVIHAC
ANMRNCTLAEQLMSQMQNLGLEPSSGTYGGFLRAVVAARGFYDGMQVLEVMQRKNMKPYD
STLATMSVSCSKGLELDFAEAFLDQISQSPSPYPFNAFFEACDTLDRPERAIRMLAKMKR
LNIQPNVRTYELLFSLFGNVNEPYEEGNMLSQVEVARRINAIEMDMMKNGIQHSHATMQN
LLKALGVEGMIKELIQYLRDAEKPFSSICSLLGTPVYNIVLHSLVQAKETHLAIETFKTM
KSCGVPSDAATYTIMIDCCSIMKCSRSAYGLVSMMIRDGFNLQTVSYTSLIKTLLGLEDF
DEALKLLYQGKLDKIQPDLLLYNTILQVACEKFCLLRSSECYPPFWWYAGILF*

>g51035.t1.2.5bbdf941
MLISLTELASRWTLLMPQQNQSKFPPVLLREVLKVLHKIISYNLPTFPSSEMLEVFCMLL
KFVENIIQSSIMSERLMAKWVIKDILGKFLGRPKLESDDMASTLTCQLISFIMDNISVLM
RLNVGGHLFMLNTGGHSTTMTWFLGNRNQSNEELNREVTSLLKYILYLVENHSDVSSLVL
DKVSGFLDCLVNMLHRDLSTERDNAEIICDKEDKMPDIPKLVVFLTKIINTCLENLEVEN
AKTIEVLNPLKLLVDYACKSIPFDSCMYGIFLLLLHFHSGYKNIWQEMNQFIDFDDSYTI
YHGDSFLKHDTLITECARKMFERRDNWSLYKAGKHAACQGLWSTAAFIFEQLTKMVLSDS
SYLWLKTLHLFSHSESQLEYFGIINVQDSSLEAGEGIGQNKSLYNYAEILVGAYNGVRLA
DKTMRTCAPRLAFNFQTWFLVLRAKVLKVLMDITALLGPVSFIQDSTSSGQKRIRVPVPS
LIHLERYSLLVDSLTPLSFRLKKLADEFDLLGSSFIGMDRRSMRIISSLATSCSLLAFVF
QLALSIPCSHVLENNVTVSSDGLDAVVIQDLLERLWLIDSETSKDLWMLLKVYGKSKSCL
LPQTRNQATGISYKASGIIKLCKYAVMEIVGLQNKVSTLCSDESRSQISNDGLQLLLSIV
WKWMQIPFKCPKHFFQVRDNVLSELFVVNENGENIDGTAVSLGSHLSLNLCLQLKNMPPS
LLLQPSKFYCILSCTIQPPNGENKEQAWLYSEEWEINDILDLNEKLMLYVTGSAAPNALD
VKNIAGSCLDKDSYVCFHPNERGQGFSTCLLDTSTFPAGNYRIKWHSCWIDNEGSYGTPL
ALNAGPNFTIEKPSNLRSMMM*

>g50100.t1
MDFVETRESQDSVRVISNSIDSSGKLSQVDNSVESRESSGVDTESAVGADTESATEAGPI
NESGPSQMESVKRMGLFSWKRRRLGFKPSTIKGEPLDKKSSGLKNESKSDLEPQCGSSTK
VDPVNSGSTQVDDKDEWESKEVISRDGQTKLKTSVFFASFDQCSNRAAGESACTALVAVI
AHWLQLNRRAMPKRTEFDNLIIEGSAEWRKLCENDAYTDDFPNKHFDLETVLHADIRPIA
ISRDDSFVGFFSPEKFEALKEAMSFDEIWEGISRVAENHDPRIYIVSWNDHFFVLKVEAN
AYYIIDTLGERLFERCNQAYILRFDESSLMYGKSVTQEVNKAESSETESANPSDIGEFVC
SGKECCKEFIKRFLAAIPLQELEEGEKKGAVSYYSLHHRLQIELNFSYLLSSSLTSSPFS
SSSSNSASSCLTDECV*

>g46576.t1
MLSRVNSMVWMDEKDQETASWDHHHHQTTMNNSSNNDQNGGVLENKEDMEMGSLPTFKSM
LGVEDEDWYLTTTNQHETSNPHNNSGGNMQSSHLDMRDITFSANFTDADHQNLILQPVDS
SASCSPSPASVFNNLDPSQVHHYFLQPPSKSNLLAGLNGLSTAQLDSGSFDLGCESGFLE
NHHQGLSGFSTRGGLGVLGVGFNDLSSQNQLGSPNLNPGGQFSSAHLLQMPQNNGGFGSL
GLGEGSGNVNSLFFNRSKLLQPLDNFASIGAQPTLFQKRAALRKNLASSSSNLGALGGEI
GQSSGNSEGYDKKKEGREVSGLKRKSSNVDDFDDVSIDGSNLNYDSDELLENTNHSKVVE
EGGRNGGNSSNANSTVTGGEDQKGKKKGLPAKNLMAERRRRKKLNDRLYMLRSVVPKISK
MDRASILGDAIEYLKELLQKINDLQNELESTPPASALTPTTPFYPLTPTASALPCRIKEE
LCPSAFASPLSSPTGQPARIEVRLREGRAVNIHMFCGRRPGLLLSTMRALDSLGLDIQQA
VISCFSGFALDIFRAEQCKEGQEIPPEHIKAVLLDSAGFQGIV*

>g68274.t1
MLRFRPLSSRFIRSFSSFDHAVSRINNLSLGSGISSTGTTTRYLSSVMASLSTVSTQKVV
VSGQDESTQKIPQPPLQVAKRLEKFKTTIFTQMSMLAIKHGAINLGQGFPNFDGPEFVKE
AAIQAVKDGKNQYARGYGVPDLNSAVAARFEKDTGIVVDPETEVTVTSGCTEAIAATMLG
LINPGDEIILFAPFYDSYEATLSMAGAKIKCVTLRPPDFSVPLDELRSIISKNTRAMLIN
TPHNPTGKMFTREELSVIASLCIENDVLVITDEVYDKLAFEMDHISMASLPGMYERTITL
NSLGKTFSLTGWKIGWAIAPPHLTWGVRQAHSFLTFATSTPMQYAAATALRAPDSYYEEL
KKDYMAKKAILLDGLKAAGFIVYPSSGTYFIVVDHTPFGLENDVAFCEYLIKEVGVVAIP
TSVFYLNPEDGKNLVRFTFCKDEETLRTAVDRMKEKLSRK*

>g16244.t1.4.5bbdf93c
MYDHNTKRPRGFGFITYNSEEAVDMVLLKTFHELNGKMVEVKRAVPKELSPGPTRSPLSG
YSHGLNRVNNFLNAFPQGYNPSSMAGYGVRMDGRFSPVTVGRSGYFPFNSSNFAMGPNLD
SGLSSDFGGSGSYSPNIGYGRGLNPIQSVYSNRYNSPVGYGVGIGGSGSLVNSASRNTWG
NGSFNYENNSGNSNDFVGSGTGNTELLSAFGNIGAIWGSSPGSGQGEGTGSFGGSNINYG
NGEDSFMAGAGYGKVSGSNVEARSSYAARVDTQDLAFGNLYGSGSIYDEPTWPASSPELA
NSGNFSYRLGDATSNVTPNNSVGYVGDYSVVSRSNRGIAA*

>g48349.t1
MGSAEEDYPSCKRPNQHTQTKHKFKILLVVILTNLLTIYIFAGPSLPITRNLSLPTWDYT
TKLLHELNITKRELANSRAQISDLQQHLKASNILTKSLLTQLTRLNGAIDQHSTIESSLF
NYADLLTDLSSEAKLGIGPHKLPLGYSPRSGSEEIYSSVGGGCLRYKEELAQYMTYKIGG
ECPVDDVFVQRLMLKGCEPLPRRRCHPKSPAGYKEPTPLPKSLWTTPPDTSIIWDPYTCK
NYSCLVERKKLPGFYDCKDCFDLQGREISRWLFDNGGLDFGIDQVLGTKPHGTIRIGLDI
GGGTGTFAARMKERNVTIVTTSMNLDGPFNSFIASRGLISMHVSVSQRLPFFENTLDIVH
SMHILSNWIPDTMLEFTLYDIYRVLRPGGIFWLDHFFCLGSQLNATYVPMLDRVGFKKLR
WNAGMKLDRGIDKNEWYFSALLEKPVSF*

>g4052.t1
MPFQMGLAREQKVLIEGNKLPNFGQVVECLTALSKIGVCGADIIKILEGREQVNQYSLSK
DCCGAIFDIAAKCDLAKLQIDPRITGSILEACARGAADPPTQAFDDKSTFDEDISWPTLF
*

>g45319.t1
MDSVLQQKIGNNCRPPHLQDISRRILGKCKDFLLVIVSIGGILSLKDKSKRDDWEMILRR
LSGKLEGTGKLERVKKILLLRYNDLPFFL*

>g69055.t1
MSGPLERPFRPSMEKIDLENADDERKTRLGSLKKAAINASTKFRHSLTKKGRRNSRVMSV
VFEDEHDAEELKAVDALRQALILEELLPAKHDDYHVLLRFLRARKFDIEKTKQMWADMIR
WRKDFGADTILEDFEFKEKDEVLKYYPQGHHGVDKDGRPVYIERLGQVDAVKLMQVTTMD
RYVKYHVQEFERTFVDKFPACSIAAKKHIDQSTTILDVQGVGLKNFNKSARELIQRLQKI
DGDNYPEVLIPVYFL*

>g68066.t1
MGVFVRSMRSNFADRGGGGGGVASAEGSGAVPRPGDVAGCAEHWKSVTMVLDYQLAHLTI
CSLTYGVGAWRERIIIFTGIYGPTEALIKSLLDSGAKAVIWSSAEPEETQWTTFQGLCEF
YCVGNGKFEIGDEEAEVEDMEPASPRSEWEDSEHGKNGERSLLSWDDDDEELSEFVCQLY
DSLFQGGARVDVALQNAFALHRGLRNSWQLCSMTWSSHFISFSH*

>g3138.t1.1.5bbe1a08
MIDDDVLGATNSRSTQTFSVTRVSIKHHGHRRRHRFRGCALLSPIVSGTQLRYRTDLQVQ
TLPLPLSFTETSLSSYLQASSTIECVFGVDAAVPDGNSVVFDDIESHRLSLRLWLAFRRY
VM*

>g60423.t1
MNSLQGKIPTELGYFKKLEILYLFDDNLTGEIPSSIGNLSSLTRLSLGRNKLKGKLPNEI
GFLTSLFFLGFGANKLSGMIPTSIYNISTIEILSTTANFFHGNLPDNIGLSLPNLRILFM
GDNRFNGNIPNSINNSSELQVLDVADNRFDGQVPTNLGDLPNLIRLNIGRNFFGSNSTGD
LGFIASLTNNSNLRTIDLDKNNFANLSYQLLRIFLGGNLLSGTIPEGLGNLVNLYVFDAS
WNFLSGAIPSDFEMAMEVQIMNGERKMECIISLLKIGLKCSAILPNDRMDMSEVIRKLHL
IKDVFLGVKIPKEGLGV*

>g9141.t1
MDEIEHKYIEVNGLKLHVAEIGGNGSKTVLFCHGFPEIWYSWRHQMIAVAKAGYRAIAPD
YRGYGLSDPPAVPEKATYSDFISDIYSLLDVLGISKVTVIGKDFGARVAHLFALLHPERI
TGIVTLGIPFLPPILPPFNEGLPEGFYFARWQEPGRAEADFGRLDAKTVVRNIYILFSRA
ELPIAEENQEIMDLVDSSTPLPSWFTEEDLANYGALYNKSGFQTALKVPYRSMQEEINIS
EVKVDAPALLIMGEKDNFIKFPQMEDYIRSDQAKMFVPKLETVFIPEGSHFVQEQFPDQV
NELILNFLKNHS*

>g43874.t2
MASSSLPTPNSFSKFIMDSSSTSSKSNCFGGSRRLMVLAQQLRMYKSPPTPDEIEEQKLQ
ESAGKVVSQVGFLESATPVAHRPERFRPKRAAVLICLFEGDAGEFRVILTKRSSRLSTHS
GPSDIGEVALPGGKAEETDANDAETALREAKEEIGLDPSLVNVVTCLEPFLSKVCNALRV
IPVIGILSDRKAFSPTPNAAEVDAVFDAPLEMFLKDENRASEEREWMGDKYLIHFFHYEM
DGKKYLIWGLTAGILIRAASVVYQRPPTFLEQSPIQAQQFNKDLPATTELHHPLFLRRDV
ENICSVVILEQWGLATERWC*

>g37496.t1.4.5bbdf93f
MLNFFCFTVEYTQIVHSLNSWSMLHAIAAPKACTSISYPRKPCYRSRHLAPTRLRASASL
PEPNGVKVEYTPWLIVGLGNPGTRYHGTRHNVGFEMIDRISRAEGILMNTIQSKALIGIG
SIGEVPVLLAKPQGYMNYSGESVGPLAAYYRVPLRHILLVYDEMSLPNGVLRLQPKGGHG
HHNGVKSVIEHLDGRREFPRFCIGIGNPPGTMDMKAFLLQKFSAVERKQFFTIFR*

>g34266.t1
MEEALLAEKVERKRLATWDLFVQELKRVSYIAVPMVVVTVSQHFSRVASMMMVGHLGELS
LSGTAIATSLTNVTGFSLLFGMASALETLCGQAYGAGLYQKLGVYTYGGIIALVMVCIPI
SILWIFIDKLLILMGQDHLISAEAVRYAVWLIPALFPYAVFQALIRYLQTQSLIFPMLIS
SVAALCFHLPVCWALVFYLKLGSAGAAIAIGLSYWLNVIMLALYVKYSAACENTRISFSK
DAFLSIGEFFRFAVPSAVMACLEWWTFEIVILLSGLLPNPQLEASVLTICLMISSLLYFV
PYSVGAAASTRVSNELGAGNPEAARVAVWAVIFLSIAEVIIATTTLLCCRHYLGYAFSDE
KEVVDSIKELTPLICLLVTMDGIQAVLSGVARGSGWQHLGAYVNLGAYYLVGIPMALVLG
FVLHLRGRGLWIGLNVGSVVQSFLLSLITSFTNWEKQATMARGRLFDKRVPAD*

>g44383.t1.1.5bbdf933
MASRKRSISNDADMHALYKEWDEASCPICMDHPHNAVLLLCSSHDKGCLSYICDTSYRHS
NCLDRFRKLRNENTSCILNPTNQLDMVNTSEGNLGLRSSGDRTDTQGDHEVTVVDTVATQ
ELGENSSQAADNNLEMQGEPTEVRDSGSLLEVVGLEVNNTENASESMSNLRCPLCRGSVL
GWKVVEEARRYLNLKHRSCSRESCSFSGNYRELRRHARRVHPTARPADIDPSRQRAWRRL
QEQREYDDIVSAIRSAMPGAVVLGDYVIENGDRFSGERDRGAGENGRWLSTFFLFQMIGS
VDPGAELRGGRSRALSRHRRSSGAFSRRRFLWGENLLGLQDDDDDDEDDQEDEPELNVLS
DSGEDVPLNPRRRRRLTRSRADEDRQ*

>g75016.t1.1.5bbdf936
MEENIIYKTNSVPIEKVLQTSFACMDRKRKLLVEELGTPPPKHKWSNRSFALEYIFPSDA
DSDLDKGDLNGMSTVGESEQESVKDSNSVAADADSTISVSNEAEVGADYGYLKECSSDRP
FASFVDWGGNFSKHTLNSLESTLVTKRSSHIQESPSAGKERDYLHQNMGPKSSMNYEEHL
LEFGGHVDCSCAECRASFEGCTDRELEEILYSNELTSHSYVLSSGRWTPKQDTQQSTKKL
TIDKEFEQYFSMLML*

>g41815.t1
MVGHYKMKGEKKRKREEKYDKEEEEKRVEKSGSVEKDEEEDNGKAESGKERDVTGEVKRA
KELANELPSLPIILADDQENPNKPGVIFILEKASLEVVKVGKNYQLLNSDKHASVLKRNG
RNPADYGPDIAHQDWAYITYPSNPDDFGQSTKQSWEIESLLLQKLSISAVAKREKLLRAI
QNPVTQYLPINSRKIGFSHSSEKLVNMQDYVVVAVVMR*

>g3062.t1
MSESVFSRLSDDVVLNILYKLEDDPRNWARLACVSTKFSSLIRNVCCKSKCSQTIPSVVN
DLLCASAVPPGGWASLYKLAVCCPGLLQAGVLLENSDFGLERELGPDENYGFSQLGHCQT
APCSRNRDGNSAVSVSGSDCSWSLFDDLLFDTVYDASESSEDQSEVVVEPDRGPARASEF
SVCKRRKICRSLGSHLAQGVWNLSREQGNKLLASRFKGDCLYICDWPGCVHIEEKRNYML
FRGIFKNFKQSRVWRTINDGHRSMIDLNCGFCSCKQTWDLHSAFCLRRYFGYHDDGEPVV
RAYVCENGHVSGAWTDWPLYT*

>g54912.t1.2.5bbdf93d
MAATEAVPLVNVEGPLQKAISISEDEEFSGMAARLGFQDHLLRSLICSLENIQVFLLEAE
AKAVSSANVKAWLGRVNDLTAMADDLLDEFAYEVRRLKAELLHDKKKRNKVRNFFSPSNL
FLVTKVKMSRFNYINSSFGSLSREAHSFGLHKQEVDASSLLEQVPRIPDPSFEESYMFTT
GSDVPRLKDLLLKRVERAENEENLFFFTIVGIENTGKTTLARVLYEDAEVVDHFDKRMWV
CVSDNFDVDRILKCMFESLKIVLDLSSMSRETILLKLVEKLKGKKFLLVLDEVWNEDLHL
WDLFTNCLLRLGGSRGSRIVVTTRIAQIANSLKPGLKWEMFLQPENYEWELFQRIAFAPG
GPVMTPELEELGRMVVKSCGNDPMVIKARGRQLYSIKNEDIELILKRNSQLNPLSQSDLN
PLLGFLKYSYDCLPSKSLKQCFLYCSVFQENSVMEKDELIQLWMAQGLLNPPDGCDLSME
ELGAQYLDIMLETSFLQNPEQDEFGRVKSYRMHDLIRDLALYLSKDHCSITEVMNIAEND
FEALHVSLINCQLENRESWRDNFKKLRTLRWVNCGVLGDVLAYATSLRVLIVVDWLVEEL
PGSVGKLKLLHYLDISKTKIRKLPDSISKLYNLQTLKLYDLIELPKKFENLVNLKHLYIE
RCKDSEKLSDLPKKFQKLINPKSVKASFKECLHKNRPIEKVGKLKHSSDMVVASLRIYGL
ENVSDCKEAAKAKLSSMSTIERLQLHWNARRKNCNDENVLKGLQTHSNIKHLIIENYKGL
AFPTWMTNTTRPLILCHLVEVELEDCSCCEQVPPLGHLPCLEIVKIIGMVNVKNIGSKFY
GLTNRSIISSWNAPELFPALRELTIRGMTCLENWLDPGHRSNYSSIFPCLEKFEVEQCPK
LMCIPDIINSSHRHLRRLEIALCDSLACLPEGLGRLQSLNYLDIRGLPSMSQLSIGYCDN
LKSLTIGGFSSTSKDDYDTQHASGSKTSLHLKGGCGNLTSLPEELQYLSALRDLTISGYG
GMESLPEWFYKLQSLEILKLEFCWKLMHLPAVGTMHLLTNLKEFDICYCPLLEERCTKGS
RPEWYKISHIGSIKINYEEIKSDW*

>g2567.t1
MDDDVDRLFQCFKCGVSPPQSAFRQRKKGKHSLKTNNSAQAESTSCSIPSSSSARKHHPN
SLETQPSILNPSPSTAMGTNLNTKKQFSPIVFYGSPRGVPPKRPASLLRLLHEIRIDLAE
QNKLKEEIWATFPRQDEAIKYAKEHPKFCVFCYQDHANGQRRYLVSTYKEFWQRYKQMNP
KFRHHYEVIQEGLPCHLYFDLEFDKRENVQKNGDEMVDLLLSIVFDALREKYCIETDHDC
IVELDSSTEEKFSRHLIVRLAKTAFKDNSHAGAFVAEICSRINESRKTEERFKNLFVSKS
STPADHQSQLFVDNAVYSRNRCFRLPLSSKAGKSSVLLPSGRFK*

>g20103.t1.1.5bbdf93a
MSASRFIKCVTVGDGAVGKTCLLISYTSNTFPTDYVPTVFDNFSANVVVDGSTVNLGLWD
TAGQEDYNRLRPLSYRGADVFILAFSLVSKASYENVSKKWIPELRHYAPGVPIILVGTKL
DLRDDKQFFVDHPGAVPITTSQGEELRKLIGAASYIECSAKSQQNVKAVFDAAIKVVLQP
PKQKKKKKRKGQKACSIL*

>g57744.t1
MACTISRRLTSSKQLLKSPLFSIYSSLANPKAHHSTFNHNPNHGLFPQSPFPKPSNPQSP
FPKPSNPTLFDSQFPLHYNPTRPTTNFIRTMQGQPFFSNILIKSQLTPQDILQKRLTLCE
NQIRFFSSSNASSSSSDQEKPKTPENPSEYPSQNPEFKHQEITGPTVERDVSALANETRE
VLESMMKTIYSLSKAFAALGLIHLGLGAWISYVTEASSPVVEVSVQSILAFGLPFSLAFM
LRRALKPMHFFKKMEELGRLQILTLTLQVAKQLNLLFVRVRGVSYLCIAGASVGLIFVAL
AR*

>g23226.t1
MEDAMTWWEPVKSRQAQLAKKSVQTPSAYVFEANPQPDLDELFRALPQGCLLGLAAYWWE
PVKRKQAQLAKESVRTPPSKVSEGNPQPDLVEPSRGNECGSDMPWIVKTSFCQSWITTWI
IGCWTMGLPCLLSQTKPPFVELVVFLL*

>temp_model_3.1.5bbdf933
MARQIHSQYPRFLCRISQHKSTNSYSFSVPQKYRIHKTTLFASYNNLDKEQPTIPTSKVT
STQEPKTSIYEVKFQTLPSCKLGISLYPDFEYNAEGGRGTGTGVKSIGANNSDGNISVDF
DLNTLYIPPLTTATTRFLGLPLPPFLRIDIAPEILQGIINQETGKVDICDILGATITFLN
*

>g42983.t1.1.5bbdf933
MESLVDGVRSLPRARSSVTKLGYNLSSASGSSHPLCPPSAKDSGYEGSSSSATRMRAVDI
GMKATSIPTSSVIGSKNLYKTYRDHPEKNSLPDLMRPHLKSDKGKDELLAAPDDLDKKTE
DSTAKEAFKLENESCIKHPADDSGNCSSSDLTESVEFPSHLGSKESIGVVDGQLPSQPGG
HFCPSPQNSFYSVTQYTEAKQSFTNTEISECASSVGKSGESGEVSNSYDFVESRKTSIYR
GSTGSDISDESSSSSFSSAIYKPHKANDTRWEAIQAVRSRYGTLEMKHFRLLKKMGCGDI
GSVYLSELTGTRTYFAMKVMDKAALASRKKLVRAQTEREILQSLDHPFLPTLYTHFETEK
FSCLVMEFCPGGDLHALRQRQPGKFFSEHAARFYVAEVLLSLEYLHMLGIIYRDLKPENV
LVREDGHIMLSDFDLSLRCAVSPTLVKSSNSSLESKNSGYCVQPACIEPSCVIQPACIQP
TCFAPRFLGKSKKDKKIKPRNEIHNQVSPLPELIAEPTNARSMSFVGTHEYLAPEIIKGE
GHGSAVDWWTFGIFLYELLFGKTPFKGAGNRATLFNVVGQPLRFPESPTVSFAARDLIRG
LLVKEPQHRLAYRRGATEIKQHPFFQSVNWALIRCASPPDVPKPFPLHDISRVPKPEVPG
VDVKPSGNYLEIDFF*

>g58377.t1_g58378.t1.1.5bbe1a05
MDVGKYAHSPVHKAIILKDYASLKRIIAGLPRLCEPAEIHNEAVSMTEEAKADAISAVID
RRDVPNRDTALHVAVKLGDEPATEMLMLAGADWSLQNEQGWSALQEAICNREEGIARCIV
RHYQPLAWAKWCRRLPRLVATMRRMRDFYMEITFNFESSVIPFISRIAPSDTYKIWKRGA
NLRADMTLAGFDGFRIQRSDQSILFLGDGSEDGKVPPGSLCMISHKEKEIMNALDGAGAP
ATEAEIQQEVAAMSQTNIFRPGIDVTQAVLLPQLTWRRQERTEMVGSWKSKVYDMHNVVV
SIKSRRVPGAMTDDEFFNSCNENETESEELDDILTDEERRQLEAALKMDSSDSNNENGDG
IIAHRHSCYEQRDIPIEDTNGCVNGDKKQEKKGWFSGWRRRDNKSEPEKKLTPPRSSLCV
EEKVSDLLGDSPSGSQNKPGRHSMEIAVKRDDYHEHRRRRDNKASSSTGSDRHKDGSREN
EYKKGLRPVLWLSPDFPLQTEEFLPLLDILANKVKAIRRLRELLTTKLPKGTFPVKVAIP
VVPTIRVLVTFTKFEELQPVDEFSTPPSSPTAGRESPAVMQSSSSSWFQWIKTPYNRPSS
SNGGSSSIRIENVQDPFALPADYKWVTAEEKKKRMQEKNKSKKGKNRK*

>g43693.t1
MLNKIAEAIAGKHDQTKKIKGTVVLMKKNVLDFNDFNASILDRLDEFLGNKVSLQLISAV
KGDPGQRLTGTLGSPAYLENWITTITPLTAGESAFTVTFDWTEDIGVPGAFIIKNLHHHE
FYLKTLTLEDVPGHDRIHFVCNSWVYPAEKYKTDRIFFSNQAYLPKNTPEPLKWYREKEL
VNLRGDGTGELKEWDRIYDYAYYNDLGDPDKKDPSYVRPVLGGSVEYPYPRRGRTGRPPT
KTDPNSESRLPLLMSLNVYVPRDERFGHLKMSDFLAFGLKSIAQFFFSEFEAVLDSTPTE
FDSFEDVQKIYEGGIKLPKKITENISIEFLKQVLPMDGEGLLKYPLPKIIEEDKSAWRTD
EEFAREMVAGLNPVIISGLQEFPPTSKLDPNVYGNQTSTITSEHIENKLQGMTVEEAIKT
NRLFILNHHDTIMPYLRRINNTTTKTYASRTLLLLQKDGTLTPLAIELSLPHPDGDQFGA
ISKVYTPAEEGLENSIWQLAKAYVAVNDSGVHQLITHWLHTHAVIEPIVIATNRQLSVLH
PIYKLLHPHFRDTMNINAIGRQILTNAKGVIEATLFPSRYAMEMSSFLYRDWAFPEQALP
ADLIKRKVAVEDSTSPCGLRLLIEDYPYAVDGLKIWSAIKTWVTDYCSFYYKTDEMIQED
TELQSWWKDVREKAHADKKNEPWWPQMRTIIELIDSCTIIIWLSSALHASTNFGQWPYAG
YLPNRPTTSRRFMPEPGTPEYEELKSNPDKVFLKTITAQNLTLLGLSTIEILSRHTTDEV
YLGQRENPEWTKDLEPLEAFKRFGKTLSEIEDQILQMNSDPKWRNRDGPVKIPYTLLFPT
SGSGITGRGIPNSIAI*

>g72813.t1
MASWMIGPGTDGFATHQSADVGVVLGGGGASGDGYTLGGSYTGGLGTFPPPAPPEEGAVG
VLPPLGGKIFEVSPLPNTSSASAPAVEKTKDPVNTTWDSRTSKEDMEEMWNHPNVRKEWT
KSGEKIGKVRLSHDTENRPYLSRVELRAVSEIILSKHFSTRRVQPTVLCALAEIVSMRFV
NGVGQRTGLMGIDYPTARWLYKDVGYKAYIVESVDDLSKPFVSMYFGAAYLAWLSEYEGR
ERTPQFIVQAYLAGPQKVNLQETGPLWLKFEEALSRYEDVKIEEGNCTIL*

>g55837.t1
MTIDQNTEVILRNLLAYEAAVKKADRHEVEDDNGVSEIKDHMRLMCAITKTEEDVTRLKE
RNIIKTEMNNKDVVEIFERLKQCMEKDPLKSKVLDTNEDSDVNPKVKAFFEKMNNWIGAF
FKFLKRVVPMLVLLLFFFQYFCNIYDCHRQPLFGTPSFLGLDSQAESMPPRKVLRYST*

>g41935.t1
MFTDGIRQSVVLKAALVIGLALLSGVDGSLAEVALGLLVEFGCYGDGEGRGAGLSGWTVR
ELLFGDVRGVCGWMETVRREKEPLAVMEEEGDGAFFMAVVIQRESQVEEEPLVMAFWGCG
DVW*

>g36413.t1
MEAESNPNSNGEEPTSWEELYNINLMPSELFFKFRKEIEGYRIGVNLEFYNAPTNEYQAK
LVLKPLAHDRRWKFIYEPLHHDVRLLSKKIPVTKFLNLQVGVGHSFQLHTTGWKWKLTTC
LGGDGVSRIQNKTTLGLCPGVDFRFGWKADYVFPEITGALGTGEPLFNMNSGRLQASLDR
IETIFTHVS*

>g60890.t1
MNRCAYQHHQQQKAALVGLGFVGEIRRGGDSFVNSSIAACPNGVVCPKPRRIVHVTNDPI
NIRTSRFLHANNQQMEGCESRAGTELLDIILAKGNYGAEKSNFQVASSPPFFNGSPPARA
SNPLVQDEQFGIGKMTNPLSPSMGPSASPSSRKTGSGGSSGRVKCGNNPAPVRIEGFNCR
GNCSISAVVA*

>g47583.t1
MKPLPLIRNFIICFEQVRKEKLGDRITALHQLVSPFGKAQIEALSSPYLGNVSGGSMGQG
HQQQSDVQDRPKDLRSRGLCLVPVSCTQHVGNDNGADYWAPALGGGF*

>g68783.t1
MGVEMLVIGVKMRKIVIFTTRRCYRSVCSHPFLVGLLCFLVFLYRSSPFVFSLLVSASPV
LVCTSVLLGTLLTFGQPNIPEIEKDEQTTHEVASLKTGVSGDTFVVKMDESYSAEKFTDE
RGDVIEQLSGFASSIANRSTEHHRGDSLDSGAPLLEERSREMEFGIRAVAEEGRKIHDEA
YEQKDELDDQRLVDGATKVDDEDLELENDKSLAESFDSERVNVDSLDSPPGSPWKHAEEG
EEQEEEEDEDDDEAIDSGSDRAESSSPDASMADIIPLLDELHPLLDEDAPQPVSLSRDGS
DFASERSFQSSDSSNESDDNKEKHEDTEVADDDNEDADDDDEGQGNTEGQTKSAITWTEE
DQKNLMDLGTSELERNQRLESLIARRRARKIMSMMPERNLIDLESSDLPFNIAPISTARN
NPFDLPHDSYSNMGLPPIPGSAPSILLPRRNPFDLPYDSTEEKLDLTGDSFEQEFAPFQP
KEPFFRRHESFNVGPSFFGPGRQERLDGRLRPYFVTERMDSDVASYSSFQRQSSGLSDSK
ASSVPETDSVASAGDIDEKNLFEETISHQAEPVNSVPEIQLRDIAKNVDDKNLSEEDISH
ELDLISLKEDKSPGEEDICPEQELISNIEHVSQHVGHGSQSSEETASLEVGEDENRDVEA
NEIAIGLRHLQHHYEDEPVLFGEGRVSNPMQFNATETHSNAETVKHGHKTTSSSSSLSEV
SERIFSEREAAGLPNFVERSDHIVEDAGISAQYSQEGSDLNMTSDTAQKEPVFDSSPPPI
RKSLSSSSVSSDLHVDSEVPPMVIKTTVSFADRESESGNEVTEKNISDDNDLSALVLQPI
NENQSESMMVTEISENPIMRFDLSGANLVSNNTSAPVVPESNVNHASKDSNSSQDSAIEG
HLMYQHGSEYQADQSFSSVDADVHLVVHNVMPPSVECIATSSEDQKLSRSSEPSSPFVEQ
VLLVTSQSMAEQSVDKEVSFQLELGPGLSLISGTVVGDGDCIEPEEKQISVHDQSTCEEK
LIAECGEELVFLDKAVDETSSRDNHEEETAITPEEIIEELSSRDNSNIPDAQELEHEVSL
NMNPPVTPESISILSDAYESRAAEGCLDVESNSFHDFGNDNQLRAREDSKFSAEATASQV
NLQNIDDDADEIKEINEVLLSELDAVGDFSIQELRSTSNEFEKHVASIEDGLSASHVTIP
NTSVLDDDFTKMHENESELHMMDVRAAQGDEVTQYVEVKCVSEPQTSWTSLTEHTNLSSA
SSIEEVQNYIDPISTQKEILLSQNEIGLANFRVVQNSNAEVVNPQMPLIEARSLEDIEPI
FKKSEMASAEKETLLGDTEISPQGQANEASSSGMPVLEAQTLLDIDSAFKQMFVKIIEEP
IVSESPSPKPALEEITTLGSEYHEQHEGSSVTKLKMELTIPTAIPVEDDDSDLKQPIKVN
AERDMLLDSVDTFLHVGEIKDSEQASSQLPIVQTVSLNDPSLALTKVSEYQQDKGLQSSA
ELFEENVAGTSGHLQSSANKLDVQDVRNEDEKPDNSSESPKNLTADDAGKVGERSHRTSS
SSSHSDYE*

>g43473.t1
MDMGLWVLSGHYREEDGAIGGNIVHSGGDWGCDWWCVMRPSEKEAGEVRLHVMVLWLQLI
NGGHWQNWRFMEGGYSEFEAVAWGCGLQIIGLFGFQ*

>g24422.t1
MGCFCFTSCFGSSKKHSCKSKRLQDLTPPNDQKLSRSQELNEALLRTTNPTARESKIEEI
EGKNEEQLNPSFRKKVTFDLFLKSTPDEKDTNALVENEEKGNSEGIKDDIVRDFLYSSEK
GEENAKNEKSKDEADLLSDSTVSSLFTYPPNHRYQNCASSDDECVDTDFNHGNSEDDEVD
RNKNFEVDGNHKDKDGCEDRALDQPDSSESLFSISIESGKQTSAVDIGDEKEVSSPLKAL
SDKEINKANARDRNQYVHSVLNPIENLSQGKAVRAKTTTQLEHQGKKNLNLEPGVMTWPS
IEKENFNLEQDNVIVPSSEEPNLKQSQQQQRSKRFSSRLKDDEVAVDTSLSSWLIESEKT
PLNGNSPDSVGNSSSKRTKSPEGFEDRPILGVLTVEDLKQMSKPASPFPRRPSPNPDEMP
IIGTVGSYWRQTGEIIDGDNCSSGKETLGASGTSRQCRKDGMNGHSTPFQASLDRALNGA
PASLDYSHQQMLNPCSSFPLFVAISK*

>g36901.t1.2.5bbdf93e
MKIVTYNINGLRPRISQFGSLRKLLDSLDADIICLQETKISKSEIRADLVRADGYESFFS
CNRNFDKSRAGYSGVATFCRVKAAFSSDEVALPVAAEEGFTGLLESSRVMGSQEDERPSV
LEGLEEFSRDELLKVDSEGRCVITDHSHFVLFNVYGPRADCDDAERIQFKATFFKILQRR
WECLLLQGRRIFVVGDLNIAPTTIDRCDAGPDFEKNEFRRWFRSLLVENGGQFVDVFRAK
HPERREAYTCWPTSTGAEEFNFGARIDHILSAGSCLHKESGQERHNFISCHVKECEILIQ
FKRWKPGNTPRWKGGRSIKLEGSDHVPVCMSLEEIPNVQQHSTPSLSTRYCPQVYGCQQT
IVSMLTRTQSAEKVKNAAVSSSFSEAYDCPEDMTSQTSCSRTLCLGSSLAKAGPHVETRK
KARQSQWSQLSLKSFFQKSSSQSDTRQSTGSEIKLSQTDVSTSFCYTNSSSVHVEESCNP
KDDISDASASNLVDNEFDDCQPSRKENSNVALSEWQRIQQLMQNSIPLCKGHNEPCVARV
VKKAGANLGRRFYVCARAEV*

>g42103.t1
MGTQEDNRLLLEEGLMQNERSGLYTGDGSVDIKGKPVLKSNTGNWRACPFILGNECCERL
AYYGIATNLVTYLTKKLHEGNVSAARNVTTWQGTCYLTSLIGAILADAYWGRYWTIATFS
TIYFIGMCTLSLSASVPAFRPPECVDSVCPSATPAQYAIFFIGLYLIALGTGGIKPCVSS
FGADQFDDTDPKERVKKGSFFNWFYFSINIGAFVSSSLIVWIQDNAGWGLGFGIPALFMG
IAIVSFFLGTPLYRFQKPGGSPVTRMCQVLVASCRKWSLPLPEDSNLLYETQEGFSAIEG
SRKLLHTNELKCLDKAAVISDSDIKAGDFSNPWKICTVTQVEELKILIRMFPIWATGIVF
AAVYAQMSTMFVEQGTMMDTSIGSFTIPAASLSTFDVISVIFWVPVYDRILVPIARKFTS
NERGFTELQRMGIGLFLSIFCMVAAAVVEIKRLQLARDLGLVDEAVAVPLSIFWQVPQYF
LLGAAEVFTFIGQLEFFYDQSPDAMRSLCSAFSLLTTSLGNYLSSFILTVVTSITTKGGK
TGWIPDNLNEGHLDYFFWLLAGLSFLNMVIYIFCAKVYKSKNAS*

>g46658.t1.10.5bbdf935
MDLVNPFRLCSGLKVFGYFMIVLVVSIIALSYYAVVLLTWAPRLLHAGFNSFFSFFIIIL
FHYLLVLLTWSYMMVVFRDPGSVPDNWKLVSGEDIEEGNSTSISHNLGPEIPAQMLPSSD
GTETRPAVRYCIQCQNGKPPRCHHCSICQRCVLKMDHHCIWVVNCVGARNYKFFLLFVVI
LMFFTYIKIILFSILHELFYCFLFIPYILEYSCPNF*

>g24641.t1
MECEAPEVVVLLKENGCQFFKDICIGGEVACHDKCCVENCELDHNNLSNLLKYELARNSS
DVSEEMLLYISTRAEESFSNHDCIHDDVKLCGAEKKLMEDKPVRSGTADNSTDACSSMKE
SWERRNFTASEQITNLSLSQLFNHDDLRDQQQNHQEDQNTGTILVNSWHGKEADCKTSHG
VDPRSELDTGAKTITNFSGSQLVTSDKDKITKTAGVEQTSMTEDMPEMVDNMSKVPLLDS
ASRQNNVGHHREFGSSSFSLASTPSGRLTFSGSIPCSDNISLRSNSTASTRSFAFPILAT
EWNGSPIRMAEVDRRRPRKCGCWRMCFTCSKF*

>g30759.t1
MDGNPDGSKETVKMEPFVILVDTGKRGSEEAGMDAEAYSVLMSTLSEIGMLRLIPRMLAL
KAVQRQIAASRSAGPPRMKQHGVSGRFPITVPMLPFSNLAHTPNFRASLRQLPLAGVCCI
RLGGLEEKVTRSEKNKLHEFFRIHFAQTLIID*

>g35309.t1
MIENLRHASPAPENDRRRTALSDSDAEINRVESVRPKRWELRRMRSLDNINSSLLVSDYE
AVAGKGRCLKKKRPRDENIHVDRSQSGEEERKRWNGKEAIVSVSLEWSSSNQLKHDDVVL
QGSTSFINEEGSKGNEKMQDVPGRSHGSISVIGRRREMEDAVAVELGLLTRSRGSKRYDF
YGVYDGHGGSQVAQACRDRLHKLFVEMVEEEDGIIDGDGVINWSKIMMEGFKKMDEEVNM
NGAAVATVGSTAVVAVVGEEEVVVANCGDSRAVLSRGGIAIPLSSDHKPERPDELERIEL
SGGKVINWNGQRVLGVLATSRSLGDHYLKPFVISEPEVTVSKRTNMDEFLILASDGLWDV
ISNDVACFVVRRCLDGNIRRAQQEVANGKTFNESTPPTILSREIENGGLAAEAASLLAEL
AIARGSRDNISVIVIQLKTSACCMAETGNCSGRKDEKA*

>g66117.t1
MDFVIIPAGVPRKPGMTRDDLFNNNAGIVKTLCEGISKCCPTAIVNLISNPVNSTVPIAA
EFFKKVGTSDPKRLLGITMLDVVRNNTFVGVMRELTILPLLSQVISPCSFTVEKTEYLTS
GIQNGGTEVVEVTELPFFATRVRLGRNGVEEIYPLGPLNEYERAGLEKAKKELTGSIEKG
ISFVRK*

>g10763.t1.2.5bbdf935
MAAKDQSQQLSTPLLSNNGAHSILTIHDEEEEEEPSSVNANTNTDNQQDSENPYGFLGAH
GFELPGPTTVDPFKNETPSIDGLYEWVKILVLLPIALLRLVLFGLCLMVGYVATLCALQG
WEDKQNPMPKWRCRVMWVTRFCSRGILFSFGYHWIRRKGRPAPRQIAPIVVSNHVSYIEP
IFFFYELFPSIVASESHDSMPVVGTIIRAMQVIYVNRFLQSSRKHAVNEIKRKASCDQFP
RVLLFPEGTTTNGRAIISFQLGAFIPGYPIQPVIVHYPHVHFDQSWGHISLAKLMFRMFT
QFHNFMEIEYLPVVSPLENVKENAVQFAQRTSYEIATALNVVQTSHSYGDLMLLTKASEF
KQEKPSLYMVEMAWIESTFHLSTFEAVDLLDKFLSMNPDSSGHVAIHDFFRVLKLKPCGL
SEKMFQFIDVQKTGKITFKQFLLGSAHILKQPLFQHSCELAFVRCDVKGTEYISKQEVCL
PPLSSVLWPFFINYRFLKVPDSMLTSFFTFVSTVRRCT*

>g27358.t1
MAREKDKKSSSDSPVKVDEIIFAITFLTAFALLQLPYDKINSKVSVPRIIFKDKPSLFHA
FLLALNFAFTGAVLAICTRQGYPKMATRSRGLSIVSAATAAGVLTFSVLQNQQK*

>g26190.t1
MVAGTLLRPTLLKSNPQTHQRPHRCPPNFSYRFSSFPRSVTTVKASSSVNSQGNYRGPKP
KKEWVADWVSENDDVVRSLPIYVGGLSLLAVLFNRTVSGIAPVADASSSQSRADLLTLGL
AVTNILNGLVWLSIRPKSISAVNPEGVECQRIYSPLPDFIVSELLWAWESLSDVTCCKSF
VILYDKRIILQIGFAAASSNADEAVVIDANKLMEGSLYQGVLKSKSQSYLANLSLYPAKS
ELPFLPSNTQAVILQPLGDTGLAIIGGDMIRGFTTSDQAWITLVGEKLDSTLAKMSTISV
KA*

>g39021.t1
MHLRLKFPKTQRLGFITSTNKISSATSSLSHTYHTVHPHEREENTNLQHPITVMSIDSTP
PLDQLSLNSTVEKAQFSQRVLIRSILSRPDGGAGLAGQVVKIGGWVKTGREQGKGSFAFL
ELNDGSCPANLQVIVDSAVHKLGDLVPTGTCVHVEGQLKEPPEGTKQKIELRVQKVLDVG
TVDAAKYPLPKTKLTLEFLRDVVHLRSRTNTISAVARIRNALAYATHTFFQKHGFLYVHT
PIITTSDCEGAGEMFQVTTLISEAEKLEKELKENPAPSEVDLKAAEVLVKEKGEAVAQLK
SAKASKEEIGAAVVELTKAKENLTKLQERFRLAERCKFSAGLPKKDGKIDYSDDFFARQA
FLTVSGQLQVETYACALSSVYTFGPTFRAEQSHTSRHLAEFWMVEPEIAFADIRVIT*

>g59351.t1.1.5bbdf93a
MASNAAACAERATSDMLIGPDWAINIELCDIINMNPGQAKDALKVLKKRLGSKNPKTQLL
TLFVLETLSKNCGENLFQQIVERDILHDMVKIVKKKPDLNVREKILILIDTWQEALGGPG
GRFPQYTAAYNELRAAGVEFPPRQENSVPLFTPPQSHPIVHPASEYEEAAVQASLESDPS
GLSLPEIQNAEGLADVLMEMLGALDPQNREGIKEEVIVDLVDQCRSYQKRVMILVNNTAD
EELLLKGLSLNDKLQQVLRRHDDIVNGIPTVGAKTIGTPVAPLMNVNHENDEPEDDFSQL
AHRSSRDLSQGQGRKATNAYSEPSRINPILPPPPPSTKFSTKDAGMVDYLSGESYQSERS
PGTSGPVPVAVSTHSNNNNSFAPSSPPPPRPPSPPDEFINPTASMFTAKPAYEEPTPTSK
SADSLPSAPWDVPPTNIPPPPSRYNQRQQFFEQKQHAVPGGSSLSSSGSGSGSSYDSLVG
QTQNLSLRSSTPTKQEKQEDALFKDLLDFAKSKSSSSSKANNRSY*

>g34306.t1
MSLFWFVLGQLAEIESMGTAKKVITKEEWEKKLNDVKIRKEDMNKLVMNFLVTEGYVDAA
EKFRMESGTEPDIDLATITDRMAVKKAVQCGNVEDAIEKVNDLNPEQSFLEELERTVSLL
AFEDVKNCPVAELLDISQRFKTASEVNAAILTSQSHEKDPKLPSLLKMLIWAQNQLDEKA
AYPRINDISSATLEGPSV*

>g60711.t1
MGSKLMKKWPKQITTSLVEQLIQVEKDLQKAIVIFDAATAEYSNGFKHDTSTFGLMISRL
LSANHFRSAEEMINRMKTEKCRITEDIFLNVFRAYGRVHKPLEVIRVFEMMKEYNCEPTE
KSYFTVFSVLVNENRLKTALRFYRYMRKMNIPPSVASLNVLIKALCKKSETIEAALNIFL
EMPKHGFTPDSYTYGTLINGFCQLGKISEAKELFAEMNSNGCSPTVVTYTCLIRGLCQSN
SMDEAMSLLVEMKSKGIEPNVFTYSSLMDCLCKCGQSSDARKLLERMIAKHQVPNMIIYS
TLIHGLCKEGKLSEALEIFDRMKLQGLKPDAGLYWKIINGFCDISKFLDAANFLDEMVLG
GISPNRVTWTLHVKIHNAVVLGLCKSDLNRAFQMYLSMRSRGISVEAKIFGALVDSFCNR
KDLEKAARILDEMVLDGCIPEEATWSTILSGFWNKKKVHEAVKSVQVELVENMLRQACDI
*

>g29541.t1.5.5bbdf934
MASQGVGEAGLSNSGPSHHHHHHNTMPYAVFRGLNPPTTSFIQEGSAFDFGELEEAIVLQ
GVKINNDESKTPLYAATVRPATTLEMFPSWPARLFQTSTGSSKSGEESTDSGSAVNTLSS
RAQARLEPESPISRKSSLDPQGLEQKHLQLPNQQHQQKEQQKLEMANDGSRVEMPQAHQP
AAGKSTIEKTLRRLAQNREAARKSRLRKKAYVQQLETSRIRLTQLEQDFHRARTQGFFLG
GGGSPGGNVSSSGAAIFDMEYARWLDDDHRHISELRTALQAHLSDADLRVIVDGYISHYD
EIFRLKGVAAKSDVFHLITGMWTTPAERCFLWIGGFRPSELIKMLIAQLDPLTEQQVMGI
CALQHSTEQAEEALSQGLEQLQQSLIGTIATGTVNDGMHHMAVALGQLTNLEGFVRQADN
LRQQTLHHLLRILTVRQVARCFLVIGEYYGRLRALSSLWASRPRETLIGDENSCQIASDL
QMVQQYSQNQFSNF*

>g27139.t1
MLFLKLTLVVSALVGFASSQDLSITYNGFRSTNITLDGIAEVTPNGLLKLTNSTRQKTGH
AFYPNSVNFKNSANSSAFSFSTTFVFAIVSEYPTLSGHGIAFVIAPTRGLPGSLPSQYLG
LFNETNNGNETNHVVAVELDTIQSREFGDINDNHVGVDINGLDSKLAEPAGYYSNKNGLF
QNLTLISGKPMQVWVDYSGMAKQINVTLAPINAGKPNKPLLSLPYDLSSVLNQTMYIGFS
SSTGSVLTSHYVLGWSFKMNGEAQGLDLSQLPKLPRVGPKPKSKLLTIGLPVILIVSLSI
VISVVIYQVRLRKKFAEVLEDWELDYGPHRFKYKDLYIATKGFRDRELLGRGGFGRVYRG
ALPSSKIEVAVKRVSHESRQGMKEFVAEIVSIGRLRHRNIVPLLGYCRRKGELLLVYEYM
PNGSLDRFLYDQPNFTLNWDQRFRVIRGVASGLFYLHEEWEQVVVHRDVKASNVLLDGEL
NGRLGDFGLARLYDHGTDPQTTHVVGTLGYLAPEHTRTGKATTATDVYAFGAFCLEVVCG
RRPIEPRAPTEDQILVDWVFSCWNKGEILEVVDPNLGRDFVKEEVELVTKLGLLCSHTEP
KARPSMRQVVLFLDGALALPEFSSLGISASGLCFANHEGFSDFALSYPSSMDKAYSHPST
VAESLLSGGR*

>g24572.t1
MAATPSAANIDGAAPPAPPLPGTDMTGICFRDQLWLNTYPLDRNLVFDYFALSPFYEWTC
NNEQLRLRSIYPLDISHLSKMTGTEYILSEAMEPHLFLIRKQRRDGPDKVTPMLTYYVLD
GSIYQAPQLCNVFASRVGRALYHISKAFNTAASKLEKIGYVDADNEITASESKAGKETID
FKEIKRVDHILASLQRKLPPAPPPPSFPEGYTPPSTAEGEKGSENQQVEPQPASVDPIID
QGPSKRMKL*

>g54762.t2
MSSVVSCIPILECVYCLACVRWVWKKFLYTAGRESENWGLATDSEFEPVPRLCRYILSVY
QEDIRNPIWAPPGGYGVNPDWIVLKKTHMETEGRVTPYMIYLDHDNADIVVAIRGLTLAR
ESDFLVLFDNKLGQTKFEGGYVHNGLLKAAQWVFEGDSEILRELLERYPDYKLTLGGHSL
GAGVVTLLTILAIKHREKLGNIERRRIRCFAIAPARCISLNLAVRYADVINSIVLQDDFL
PRTTVALEDVFKSIFCFPCLLCLMCLKDTCTLEEKKLKDPRRLYAPGRLYHILVRKPFRY
AGSLSKISPTVRTAVPVDGRFEHIVLSRNMTSDHGILWILQESQRALDTLLEKEHLMDVP
AEQRMERKASIAKEHMEEHRAALWRAVALDVPQAYSPSYGTFNEIEGGENSDRTEISFES
LDRSKSWDELAGLLFETDGSGRTVLRNS*

>g20655.t1.1.5bbdf93b
MWRRVLSVTFSQQTWRRSNPFPTWMRELCTSKVDRGCKILKSPSLVSLDIQDVWDSSSRT
HSDFLPAQVYSNRTTPRKIDGQSIAEEIRLGIAAEVSQMKASIGEVPGLAVILVGQRRDS
QAYVRNKIVACEEVGFKFILTEFPENCTEDEILDVLTSFNEDSTIHGVLVQLPLPQHLDE
EKILDAICLEKDVDGVHPLNIGNLAMHGKEPLFIPCTPKGCVELLLRSDVEIMGKKAVVI
GRSNIVGLPTSLLLQRYHATVSIVHAFTNNTEKITREADILVAAAGVPNLVRGSWIKHGA
VVIDVGTNPIEDPSCENGYRLIGDVCYEEAVKVASAVSPVPGGVGPMTVAMLLFNTLESA
RRAFNFT*

>g70633.t1
MEKKDRHVKGMKGGMVTMPFIFANEICEKLAVVGFGTNMISYLTKQLNMPLTKAANTVTT
FSGTASLTPLLGAFIADAFAGRFWTITVASIIYQIGMISLTLSAILPKLRPPPCKADRLV
CKEASSGQLAILYISLLLAAIGAGGIRPCVVSFGADQFDETDPKQKTTTWKFFNWYYFFM
GASMLVAVTVVVYIQDNIGWGWGLGIPTIAMALSIITFIFGYPLYRKLDPAGSPFTRLVQ
VCVAAYRKRNLPMVSDPKLLYENDELDAVISLGGRLVHTTHMKFFDKAAIVMEEDNLKAP
NLWRLNTVHRVEELKSVIRMGPIWAAGILLITAAAQQNTFYLQQAKTMNNHLTKSFQIPA
ASMNVFNLLSMLLTIVLYDRILVPVISRFTGLDRGITFLSRMGIGFFISILATFVAGFVE
IKRKQAAFDHGLEDKPHETIPISVFWLVPQYCLHGIAEAFMSIGHLEFFYDQAPESMRST
ATALFWLAISAGSYTSTLLVSIIHKLSARPDGSNWLPDGNLNRGKLEYFYWLITSLQVAN
LIYYIFCAKFYTFKPVQLRAKEIDDSKEDGVELSGHV*

>g30482.t1
MALSGMRGLSVFISDIRNCQNKEQERLRVDKELGNIRTRFKNEKGLTPYEKKKYVWKMLY
IYMLGYDVDFGHMEAVSLISAPKYPEKQVGYIVTSCLLNENHDFLRLAINAVRNDIIGRN
ETFQCLALTLVGNIGGREFAESLAPDVQKLLLSSSCRPLVRKKAALCLLRMYRKNPDVVN
VDGWSDQMAQLLDERDLGVLTSSMSLLVALVSNSHDTYWSCLPKCVKILERLARNQDVPQ
EYTYYGIPSPWLQVKTMRALQYFPTVEDPNTRRSLFEVLQRILMGTDVVKNVNKNNASHA
VLFEALALVMHLDAEKEMMSQCVALLGKFIAVREPNIRYLGLENMTRMLMVTDVHDIIKR
HQAQIITSLKDPDISIRRRALDLLYGMCDVTNAKDIVEELLQYLTSADFAMREELSLKIA
ILSEKFAPDLSWYVDVILQLIDKAGDFVSDDIWFRVVQFVTNNEDLQPYAAVKAREYLDK
PAVHETMVKVSAYILGEYSHLLARRPGCGPKEIFGIIHDKLPTVSTSTISILLSTYAKIL
MHTQPSDPELQSQIWAIFNKYGSCIDVEIQQRAIEYIELSRKGAALMDILAEMPKFPERQ
SALIKKAENTEADTAEQSAIKLRAQQQTSNVLVVTDQRPANGTLPVSQLSLVKVPTMSNV
DGDSPDSAVTETNGTLTVVDPQPPATPPADLLGDLLGPLAIERSPGAAVEPEHSLASGFA
GAPDMGEALAIAPVEDQMNTVQPIGNIAERFHALCLKDSGVLYEDPYIQIGIKAEWRAPH
GRLVLFLGNKNTSPLVSVQALILPPAHLKLELSLVPETIPPRAQVQCPLELVNLRPSRDV
AVLDFSYKFASHTVNVKLRLPAVLNKFLQPIQLSAEEFFPQWRSLSGPPLKLQEVVRGVR
PMSLAEMANLFNSYRLMVCPGLDPNSNNLVASTTFYSESTRAMLCLIRMETDPADRTQLR
MTVASGDPTLTFELKEFIKEQLVSIPVTARAHAPAPPQPQPTSSPSATTDPGALLAGLL*

>g46079.t1
MDITTNTTITAASVKTPEAETETPTRIQPGKPSSFSNGVLKRTQPLHHHYHHHGYNHHHA
VVVTYKECLKNHAASLGGHAVDGCGEFMPSPTATPTDPTSLKCAACGCHRNFHRREPEEP
LPPPNTTAALEYQPHHRHHPPPPAPPAHRNSGGHSSPPSSPSPPPISSLYYPSAPHMLLA
LSTGLSAPPQDTNIPITPTANAGATVSGNANGRKRFRTKFTQDQKERMLDFAEKVGWKIQ
KRDEDLIAEFCNEVGVDKGVLKVWMHNNKNYLARRDQANASAGATAVSANAAETNNGNGM
EFTIHYHQNHERDSDTKNGNHEPDLSHQLHNNTDSHVVATNGNGSSSSS*

>g65198.t2
MTLAQTYQYGQGGPFYGDSMSYGYRYHDTSTSSAVTASYNSHYIGDFSCMRNYGDRRDFS
RNCREYNYNHNNYNHNRYAKPEGAPSLKRRKSSNSAWEDTGRSYQHYYGYDNVHFNQPSI
YGNFSSNDSALYSQAPSTYNNCLAVASTTKSDANAHNSTSSKRDRSTFEEDDDVLFMSRD
EIERFSPSRKDGIDAQHETHLRYSYCAFLQNLGLQLELPQTTIGTAMVLCHRFFVRRSHA
CHDRFLIATAALFLAAKSEETPRPLNNVLRASCEILHNKDFTHLSYTLPVDWFEQYRERI
IEAEQMILTTLNFELNVQHPYTSLTSTLEKLGFSQTFFVNLALNLVSEGVYKRISVLACL
IFLAGG*

>g45141.t1
MVELDFNMLPEDCVSSICSLTSPEDASRLSLVSSAFRSAAESDMVWERFLPSDYRDILAR
TIFPLKFSSKKELFFQFCDSILLDGGRKNFALEKSSGRKIFTLSAKELSILHGNESTHWC
WKSLPESRFAEVAELRTVSRMQIEGKIRTEMLSPNTNYGAFLIMKIADKSFGLDSVPSEI
SVIVGDKVLTNTAYLRPKDKWKQQMESLFYANRMQMLKMRVNPGDERLPIERKDGWMEIE
LGEFFSGEGDQEIRMSLMEIKGHQLKGGLVIEGIEVRPRH*

>g43835.t1
MTSYLKHSNIILCTFLLFFSLTITSSASALYSSSNGIKGAYWPSGRMPYLPPSAIDTTLF
THVYYAFLLPNNVTFKFEIDNSTTLQLVNFTSTLHSKNPPVKTLFSVGGGGDNPPQFSQM
ASTPSLRRNFILSSIEVARKFGFDGIDLDWEYPQNPQEMDDLSCLLDEWRAEVAKEAKAT
CRPQLLLSAAVYFSANFFLYGTYRTYPVASINRNLDWINVMCYDYHGSWELTVTGSPSAL
FDPNSNISTSFGLGSWIKAGILRSKLVMGLPLYGRTWTLKDPSDHGVGAPAVGVGPEGDG
GKGVLFYYEVVKFNKMHSATVMFDVGTQSTYSVAGNVWIGYDDCRSTALRIGYAQALRIR
GYFFWALSFDCDWEISKTVKHYIGLPAKSKLRSKHLQLSNPASMTRLERLMARTHQHLQL
LATGAVSFATMVETKNRSWNLQCARPGERKELRLLRLQHSGMLSPQIANLCNFKAGHQLG
KKWICFFFMVEEHN*

>g66934.t1
MQGLITNERNDIDPAAAPFAKTHEEIERFGLQEGAGLVEVVKKVKPHVLLGLSGVGGLFN
EEVLKAMRDSDSIKPAIFAMSNPTKNAECTARDAFKYAGEDIVFASGSPFSNVDLGNGKV
GHVNQANNMYLFPGIGLGALVSGARFISDGMLQAAAECLASYITDEEIQRGILYPSIDSI
RDITAEVGAAVLRAAVAEELAEGHHDVGPKELVNMSKEETVQYVKSNMWYPVYSPLVHEK
*

>g37989.t1
MSIVPADPLMQLETTCGTLLYELQIIWDEVGESDTERDKMLLELERECLEVYRRKVDQAN
KCRAQLRQAIAESEAELAAICSAMGERPVHIRQPDQNPRSLKAEIRAILPQLEEMRKRKS
DRKNQFLEVLEQIQKMKCEIYRSIEYTSTNTVLDETDLSLRKLEELHRQLQALQTEKSER
VKKVLDHLNTLNSLCLVLGMDFKQIVGEVHPSLGESEGTKNISNDTIEQLASAIKRLREI
KIQRMQRLQDLATSMLELWNLMDTPIEEQQTFQNVTANIAASEDEITEPNMLSVDLIKYV
EAEVSRLEELKISKMKELVLKKRFELEEICRKTHMIPESDNALDVAIEAIESGAVDAASI
LEQIELQISKVKEEAFCRKEILEKVEKWMAACEEECWLEEYNRDDNRYNAGRGAHLTLKR
AEKARALVNKLPAMVEALASKTTAWENERGIEFTYDGIRLLSMLEEYTILRQEKELERKR
QRDQKKLQGQLIAEQEALYGSKPSPMKCQSGKKGARLSCGGAASNRRLSLGGTMLQIPKA
DMLHPPKATPNTRQAKKNERLHQNDHSNLLRDDGIASLSAGRRGLDIAGLPVKKHSFEVN
SCGVESPPMVRKPFSPISSTDSSKSNAINILEDLNKKHNDMLQKALTSNNTTFTTPSKII
SVVEEENRTPKAMTIPVPSTPATVSVPMQTTITPAPSVVSPFNPKPVDEIPEEIEYSFEE
RRAGFVLPKIYL*

>g17856.t1
MDSVNLSEDLVFQVLCRNSLEASKKLDFFHWCSLRPNFRHSAGTYSQIFRTICRCPQYLD
EIFNLLTSLKHDGLVLDSGTFKLILDAFVRSGKFDSALEILDYVEKDLCTTTSLNPELYS
SVLIALVRKNQLGIALSIFLKLLENSSANGMLDAICCNEMLVGLRKADMRDQFKQVFHKL
REIGSFPLDRWGYNICIHAFGCWNDLATSLSLFKEMKDRSGSFSPDLCTYNSIIHVLFLV
GKVNDALVVWEELKSSSVHEPDLFTYRILIRGCCKAYRMDNALKIFAEMQYNGFHPDAAV
YNSLLDGLLKARKLIESCNLFEKMVDEDGIRASCWTYNILIDGLFRNGRAEAAYSLFLDL
KKKSNNFVDGITFSIAVLHLCREGEVEEALHLVEEMEARGFVVDLVTITSLLIALYRHGM
WDSTERLMKHIRDGNLVSNVLRWKATMEASMKVPQSKKKDFAPMFPSRGNFTDILSMLSS
ANMNTDSGLTTEDVEPKVDDFDEWSYSPYMDLLANQVIPPSLFSLSRGRRVEAKGTDSFD
INMVNTYLSIFLSKGKLSLACKLFEIFTDMGVDPVSYTYNSIMSSFVKKGYFNKAWGVIQ
GMGEMLCPADIATYNVIIQGLGKMGRADLASAVLDKLMKQGGYLDIVMYNTLINALGKAG
RIEEAIKLFHQMQTSGINPDVVTYNTLIEVHSKAGRLTDAYKFLKMMLDAGCAPNHVTDT
TLDFLVKEIEKLRYHKASMKRATDDFS*

>g76485.t1
MSRWILAKATKCRDEQKKSGRFYNTSIVRQSCVLKLNDFSCKSRRRQQSAAAAAAAMISL
LAQERLLGAALGTVFMGAIVFLQHRTIHESISETRSQSFPQSQLKEPTYVKQQSLDFAHV
WNKAVDQTFGPVIESLSSRGW*

>g53566.t1
MAKEGVEDWRRRKQDIEANNRKIEVFGKNQTFEVTRWKNLRVGDIVKAHKDEYFPADLFL
VSSSYEDGICYVETSNLDGETNLKVKHALDVTASLRDESLFRHFKAVIKCEDPNDDLYAF
IGTLYFDHQEYPLSAQHILLRDSKLQNTDYVYGVVIFTGHDTKVMQNATDPPSKRSKIER
KMDKIIYVLFSTLILMSFVGSVFFGIETKNDIHDGKLTRWYLRPDKATVFYDPRRASLAA
FFHFLTDLMLYQYLIPISLYVSIEIVKVLQTIFINQDQDMYYDETDKPAHARTSNLNEEL
GQVDAILSDKTGTLTCNSMEFVKCSIAGIAYGRGLTEVERALAKRKGDGPHEVGDNSLDS
QGSNSEFMDLGRSVKGFNFKDERIMNGQWVNEEHSDVIQKFFRVLALCHTAIPDVNQETG
EISYEAESPDEAAFVVAARELGFEFFERTQTSISLHELDHDSGKIIDRSYKLLHILEFSS
SRKRMSVIVRNIENQVLLLCKGADSVMFERLSKEAQFFKDATITHIKKYAEAGLRTLVIA
YRELSEEEFKSWEEEFLKVQTSVTADRDELVDAVADKIERDLILLGATAVEDKLQKGVPE
CIEKLANAGIRIWVLTGDKMETAINIGYACSLLRQGMKQIVITLDSPDVNDLEKKGDKEA
IAKASISTITKQIREGISQLSSAKESSVSFGLIIDGRSLSFALNKILESSFLELALKCAS
VICCRSSPKQKALVTRLVKKGTGKTTLAIGDGANDVGMLQEADIGIGISGVEGMQVFLLL
*

>g53634.t1.2.5bbdf93e
MPDRNLEKLASIDAQMRHLVPVKVSDDDKLVEYDALLLDRFLDILQDLHGEDLKETVQEC
YELSAGYEGKKDPKKLEELGHVLTSLDSGDSIVIAKAFSHMLNLANLAEEVQIAYRRRNK
SKKGDFADENSATTESDIEETLKRLVLDLKKSPQEVFDALKNQTVDLVLTAHPTQSVRRS
LLQKHGRIRNCLAQLYASDITPDDKQELDEALEREIQAAFRTDEIRRTPPTPQDEMRAGM
SYFHETIWKGVPKFLRRVDTALKNIGINERVPYNAPLIQFSSWMGGDRDGNPRVTPEVTR
DVCLLARMMAANLYYSQIEDLMFELSMWRCSDELRLQADILHQSLKRDAKHYIEFWKHVP
PNEPYRVILADVRDKLYQTRERSRHLLAHGTSDIPEEATYTNIEQFLEPLELCYRSLCAC
GDQPIADGSLLDFVRQVSTFGFSLVRLDIRQESDRHTDVLDAITNHLEIGSYKEWSEERR
QEWLLSELSGKRPLFGPDLPKTEEISDVLDTFHVLAELPSDCFGAYIISMATAPSDVLAV
ELLQRECHVKNPLRVVPLFEKLDDLEAAPAAVARLFSIDWYRNRINGKQEVMIGYSDSGK
DAGRLSAAWQLYKAQEELIKVAKKYGVKLTMFHGRGGTVGRGGGPTHLAILSQPPDTIHG
SLRVTVQGEVIEQSFGEEHLCFRTLQRFSAATLEHGMHPPVSPKPEWRALMDEITVVATE
EYRSIVFKEPRFVEYFRLVCTRQKRHIKHIIPFGDNFD*

>g52691.t1.11.5bbdf93b
MQPEPAATQKESGPETTGFQIGQRVVHSGGGGGGGDTRRRTGTVKYVGLVEGTSGNWVGV
DWDNDGDGKNDGSNNGVWYFEARGPTTASFVRPHNLSSSGITLLEALQLRYRSTSTKQEQ
DEMYVLSSTNKRVSIELLGGDKIQDKLSRFEELTGASLSYLGVSSPGHICDTLPNLKELD
LTGNLLSDWKDVGIICKEIPALEILNLSYNLMSHDIIGIPKLHNIRILVLNHVGINWKQI
EVLKDSVPLIEELHLMGNNINELTLPSTMRVEGFDFLRLLNLEDNCLADWNEIVKLSQLK
SLEQLLLNKNNLSQIWYPEHNAIDEAGNESPGRSFRPFQNLRYLLLGGNNIKDLASVDAL
NSFPVLMDVRLSENPVADTGKDGVPRFVLIARLANVKVLNGSEVSPRERKDSEIRYVRLV
MTKYNHNMEEIMQFHPRFAELKKFHGIEDAKAPIGGAGPQKMSSGLICTVLDLLKFPLLK
QDMHILLHSHLPLQPSP*

>g14660.t1.1.5bbdf93d
MASSRLSSLAAMAAASYSTVSNRAYADSPLRFSPFSTSRTSSSPSQTPAAGSSSSDSSTT
AEGEDSRGGFDPDALERGAKALREINSSPYAKQAFEVMRKQEQSRQAELAAEKAHFEAIQ
AHADIDKQRKWAEEQRNLYQQQAQTKAQVLRYEDDLARKRMQTDHEAQRRHNAELVKMQE
ESSIRKEQARRVTEEQIQAQHRQTEKERAEIERETIRVKAMAEAEARAHEARLTEEQKKR
MLLDRINGEREKWLAAINTAFSHIEGGFRVLLNDRSKLVMTIGGATALAAGVYTTREGAK
VIWGYVNRILGQPSLIRESSITKFPWSGLASRGVNKLFISGSVAESQSKSPLGGIVLHPS
LQRRVEHLARATANTKSHEAPFRNMLFYGPPGTGKTMVAREIARKSGLDYAMMTGGDVAP
LGPQAVTKIHDIFDWAKKSKKGLLLFIDEADAFLCE*

>g4267.t1
MEGRFQCWAKLILDGGGEFMRVGSCWRLIAWEDLSTEGRDGFDSYGFSSLIGKSSGGCGG
IAVTMVVDREKGCLICFVSTVVVHVYVSSGFSWVVLIVCQLGCLVGLVGREGDSDCCAKV
FLIGRLQEGGLVFLVAIRECLGDELGENV*

>g49148.t1.2.5bbdf93c
MAVGPRWLAYASNNPLLSNTGRLSPQSLSPSPGVSPSTSPGSGNLVARYAMESSKQLATG
LINLGDMGYKTLSKYCHELLPDGSSSPVSSNPNWKGGRATAYSSETDAAGMVIVKDIASR
TVISQFRAHTSPVSALCFDPSGTLLVTASIHGNNINIFRILPSKTQNGLGADNYDWSSSH
VHLYKLHRGMTSAVIQDICFSHYSQWVAIVSSKGTCHIFVLSPFGGETGLQLQRTHIDGP
TLSPVPSMPWWSTSSFLVNQQAFFPPPVPLTLSVVCRIKNGNWLNSVSNAASSAAGKISV
PSGVIAAVFHSIVHQNIQSISPNRKALEHLLVYSPSGHLVQYELMPSLGGEHNESSLRNG
TSLMVQMQEDDLGVKVEPVQRWDVCRRSDWPEREECIQGITLGGQEAAEAFMDTSVSEDN
ELGEKDVEKPHEQSHWHLSNAEVQLRSGRMPIWQKSKICFYTMSHHGYEDQHSVDANTGG
EIEIEKIPATEVEIRCRELMPVFDHFHRIQSDWRDDRFHSSSFGSCAGKDKLEDSAVFNC
KRISSASTEKIHAGFSKTSAFAMGTSDSGSDGSTVDENDGIRRSGSFSLNRRSSSSPESS
ANITSSLEESYIVNRSSPKNGPVSTEESPIRGVQSPNSTIAGGLSNTSSNRSDMSMKIID
EGPVHEDMHESVDFGQYFEEGYCKASANNDSHELTEAVTDSSPCDREKTEEDVESDGMLG
GVFAFSEEG*

>g71462.t1.1.5bbdf93b
MASRRRSKTPNPYSSPSPFLQNSILEPPSSFFPSSISEFLRLVAVVAVAASVALFCNYLV
TSFNRQPKPFCDSGVGDFDDFLSDNCEPCPSNGICKNGKLECVRGYRKQGNLCIEDRDIN
AAAKKISEMVEIRLCEAYAQHLCSRIGDIWVEKDDLCTYLDEHHLMEDYGLDESTYAHAK
LSAMETIGKLMERRGYTSGYEEFKCPDSLVEHYKPISCRIRQWVVNHALLLMPVCALLVG
IVLILSKALRRHYLSTRAEEIYTKVCDLLEENAVISRSVDGDGEPWVVASWLRDYLLSPK
ERKDPVLWRKVEELVQEDSRLDRYPKIVKGEAKVVWEWQGMKSL*

>g45418.t1
MLDQQCEDRTVLRYVYYYLARILSDTGSQGLSPGGGIPTPNWDALADIDAVGGVTRADVV
PRIVDRLTSEALNADVEFHPRRLQAIKALTYAPSSSSEILSKLYEIVFGILDKVADPQKR
KKGIFGAKGGDKESILRSNLQYAAISALRRLPLDPGNPAFLHRAVQG*

>g63778.t1
MMMALVGMCCSSPTPECVELASCFSFINLSKKPNYFWPRISNRFSHYNNYYYRPSCPRRR
SKFRCCSLSRPQTAAPLDEFEEDASATTASTSISAGGKGGAGVVCDESSIAAVDEDDNDF
SHVIKFKMSDFKITDRVSIGLTSRADEVIFEATVKDVNSPLYGTKVVLRRFISIQAKRRG
RRAIEVLKRLAHRKLMLHSYSMQVYGYVCSSTTGDSGSFTLVHGYHGSFSLRHWLQQSDW
LPTLEATLALDEESARKVGDDTVGGPAVSRQLRIIRILMRDLLIGVNYLHSHGLAHTELR
LENLHISPVDKHVKVGILGNAADFYESCSESSTLNSNMDRREMMIAFDMRCVGFVMAKMV
LRELMDSSIFVKFKAFLNKGNDPSCLREFLLPTINKNSSSGNTGLQILDRNWGAGWNLLS
LLLATKPSERISCLKALRHPFLCGPRWRIDLSMDMIRWNLGSTAVRITEEYIYNQQQRSR
LAHFIELMEMLNLHSKPRHWLALFPGKWRLLYCTGRHIGMTLRQPPSRVLIGDVCFTVSK
ASKPNANFSVASDVQFTVIVGQDWPHNKVGISGKLRVESFFRLKSGRRIYLKEEDSPNRF
PSTVSAEDSVLKILSSKKWKKIIPIKEFPSCLSVVKLVSSDIGVTMSLDEPLGSNTEMAQ
KVIGEVRIQIPPEIFDLSKIVCGTYVDSRLLILRSVNGSALLFTRSCK*

>g14618.t1
MPKQIHEIKDFLLTARRKDARSVKIKRSKDVVKFKVRCSKYLYTLCVFDSEKADKLKQSL
PPGLSVQDL*

>g43061.t1
MPWYRNLIQLSAAAFRTQSSLKPISTKPFSYPSSHHLLQFTTTTTSTATAAEEEKNGALA
NTTRHAGLGPTKGDEKPRVVVLGSGWAGCRLIKDIDTKIYDVVCVSPRNHMVFTPLLAST
CVGTLEFRSVAEPIGRIQPAISREPGSYYFLANSTGVDFQNHLVNCQTVTDGADTLEPWN
FNIPYDKLVIAAGAEASTFGIGGVKEHAIFLREVHHAQEIRRKLLLNLMLSDVPGVSDEE
KRRLLHCVVVGGGPTGVEFSGELSDFITRDVTQRYAHVKDYIHVTLIEANEILSSFDDRL
RVYATKQLIKSGVRLVRGIVKDVQPEKIVLSDGTDVPYGLLVWSTGVGPSPFVKSLDVPK
SPGGRIGVDEWLRIPTVPDVFAIGDCCGFLESTGKPVLPALAQVAERQGKYLAKELNRIG
AAGGGRANAATDIDFGAPFVYRHLGSMATIGRYKALVDLRQSKEARGLSVAGFVSWFVWR
SAYLTRVISWRNRFYVAINWLTTLVFGRDISRI*

>g20300.t1.2.5bbdf934
MSMVEPGYWDGFVKGVPGGEDDFSNLLSILDFPMESLEGDDELSGDWDASKLQSFGPIPS
DALMGLPPVFQGNVGNIFLDAAPKPNAAPKPHAAPKLNAVPKPNANILDHENESSSTVTS
SQNTFSEGQESGSFQTHSPVSVLESGGTCSGGKSLPIKPNVVIPVRTRSKRAKASAFNPW
FVMTPISYADSASKKTSSYRKNKEKKKKLSQLSLALNDPDDSFQQAKEEIFHASDVIEKN
ESSLQRFVVTKKCTHCEVTKTPQWREGPMGPKTLCNACGVRYRSGRLFPEYRPAASPTFI
PNLHSNSHRKVVEMRKKAMQETAIVHDAQMSPAPEFVPTSSYLFDFIY*

>g68288.t1
MRKTLFFLSFLLLNSFLCSAAEKPSPVLDIKGKQLRVGHEYYILPALRGFGGGLTLGRLG
NETCPLGVIQENFELERGLPLTFTPVDPKKGVVRVSTDLNIKFSAITTCMLSNVWKLELD
EGTGQYVIVNNGVEGNPGRETIDNWFKIEKNDDTAYKLVFCPTVCNSCKVICKDVGIFEQ
DGTQRLALSDVPFRVRFLKVKE*

>g34358.t1
MYCKCGDIVSGRKVFYGSKERNAISWTALISGYVSNGRLEQSLGAILWMQEEGFRRDVVT
IATVLPVCGELRALKQGKEIHAYAVKNGFSPVVSVATSLMMTYSKSGLQ*

>g53988.t1
MGINYWKEKVLPKIKKVFEKNGTKKAAAAEVIKAFEESKEQYNTEFEGKKTEIEPKVVEI
YEASPPEVKALIKEPKDAGLKKHSAAVQKFLDELVKIEFPGAKAVSEAATKFGPSYVSGP
ITFLFEKVSTCIPEEVKKEEEAPAEVAAAAPAGEESSAKEEVKEEEIVVEAEKKEEVVAE
VVAEKVEPPAAEAPSKVEEAAPAAAEPPKA*

>g47942.t1
MLAFALNKTTSFVNANFAEYKLLLAYAKPSSIQLSIDLLIHYPALSSMPEHPIIILLLAI
GLLLGPSNGRTLQKKVSNARELTDTINATNPKDVEGLETIVLQFQALALIGITGDPCLPT
KLTWIDCSTDSSPRVTALYLSNQSLIGFLPDFSTMDALETIELDHNFLTGSIPDFLGTLP
NLKELNLANNLFSGQVPTSVLQNKKLKTNLSGNPTLLYQTPEVYSPNFGGTTESTYIYTT
RRKKKSKLPVIIGSTVSVCVIFWAVVGVFAMFRHKAKTAEAVAQAAAEGQNVGANMHRET
TEETPINARSGAANS*

>g66508.t1
MADKVSDNMEGQRDRQLDIEDNQEANMPMDLALYRAAKQTDIDAFIKRVQQVANEKELPH
SAVFDQVSPIGNTYLHVAASCNNEEIARLIAHYSPPLITKRNFDGDTALHLTARAGYRST
TATLYRLWKDNVHLPSAEGEHKPKEDQENLLPRLKNERGNTPLHEALLNDHNQIACDLID
ADPEVAFYPNNKSESPLYLAAKAGYNDCVSWILSYSRELGEMIDPMKAGKSPFHAAISSR
KGDVLELLLEKTPRLFHLKDEERRFPLHHAASLGYLDGVRSILNKFPSSANERDKNGLLS
IHWASIKGHVHIIKELLPHSPESTELLDQNGRNILHYAAENGKDKVVGYILKDRSFEGLI
NMKDKQGNTPLHLAAMHWHPRIVSDLIWDSRVKLTVENNEGMTAFDATINCADNVGRFRK
WLTWSALDSGGVPRALPGRIPGVVRQISTPRETKDLEPFKDRISSLLLVSTLVATVTFAA
GFTLPGGYNNSDPYQGMATMLDKKKFHVFIFCDTIAMYSSIIVAVSLIWAQLGDLNLVLA
ALYWSGPLLGMALGMMSLAFMAGVSVVVSKLKWLDDAILIMGVIFVSIQLALFYILCFPV
AVHNRLLRYIGYYPFNLLIFLTNADPVAVED*

>g3226.t1.1.5bbdf941
MWPYLNKAICKTAKNIAKPIIAEQIPKYRIESVEFETLTLGSLPPTLQGMKVYITDEKEL
IMEPCLKWAANPNIAVVVKAFGLKATVQVVDLQVFAAPRITLKPLVPSFPCFAKIFVSLM
EKPHVDFGLKLLGADLMSIPGLYRFVLDIIKDQVASMYLWPKTLEVQILDPTKAMKRPVG
ILHVKVLRAMKLRKKDLLGASDPYVKFKLTESKLPSKKTTVKHKNLNPEWNEEFTMVIKD
PESQALELSVYDWEQVGKHDKMGMNVVPVKELTPDEPMVMTLTLLKNMDPNDVQNDKERG
QIMVELMYKPFKEDDLPKDFQESGTVQKAPEGTPPGGGVLVVIVHEAQDVEGKHHTNPYV
RIIFRGEERKTKHIKKNRDPRWEEEFLFTLDEPPVNDRLHVEVLSTSSRIGLLHPKESLG
YVDISLSDVVSNQRINEKFHLIDSKNGRIQIELQWRAAS*

>g3428.t1.1.5bbdf939
MAWLAAAKSFHLPAIDVTTLRSRAPLAVGFGCVSMAGAGFSRSSTLRSKPFACLGIKEAI
QTEKAPAALGPYSQAIKANNLLFVSGVLGLVPETGKFVSDSVEDQTEQVLKNMGEILKAS
GASYSSVVKTTIMLADLKDFKKVNEIYAKYFTSPAPARSTYQVAALPLDAKIEIECIAAL
*

>g11820.t1
MAEEVSNKQVILKNYVSGFPKESDLEVRTSSLELKLPQGSSSGAILVKNLYLSCDPYMRS
RMSKLDGHYTEAFTPGSPITGLGVARVLESSNPRFNRGDLVWGLTGWEEYSIITDPETRF
KIQNTDVPLSYYTGILGKFLHQKSHGHH*

>g60291.t1.3.5bbdf93c
MTSLLELNDDIVRSMAVGALFSDFGGKISSLDFHRKDDLLVTASEDDSVRLYDIANGKLL
KTTYHKKHGADRICFTHHPNSVICSSRYNLDSEESLRYLSMYDNRCLRYFKGHKERVVSL
CMSPVNDSFMSGSLDHTVRIWDIRVNACQGILRLRGRPTVAYDQQGLVFAVSMEGGAIKL
FDSRSYDKGPFDTFLVGGDTAEVCDIKFSNDGKSMLLVTKSNNIYVLDAYGGEKRCGFSL
GPSPDTAIEATFTPDGQYVVSGMDFLLHFVCFRETEHVYSFLVSCHYNSFLLCYICS*

>g61487.t1
MALNNGMRSCASKLLTPTQSLLSKSLNRGFHSTGVKRMGGGHAHGHDEPFYLHAKHMYNL
DRMTNQKLKMTLGVFTAFSIGVGVPIYAVIFQQRKTASA*

>g46362.t1
METDGNPSLKMHLAVSSRNRRESGETAGKGSRGREAYVAMKERDLGARDTDPAAANHELA
QKTKGLINVLKAYGLHREFSEA*

>g48047.t1
MILQSPKALYFMPNFTHPTPKSVSLTRYKTLRIASRCCKARDDELKELKKSSKDSNIISS
TSRFCSCVNRRHLIQTFGPALFSMDPSFGSETPPNDPKEMLNKVHPPRPGWYEELYALAM
KKCTKSYEAEIAGYKSQLFANLRGKANKILEVGIGTGPNLKYYASEPGLEVFGVDPIMKM
EKYARAAAEDAGLSPENFKFMQAVAEALPAGDASVDAVVCTLVLCSVKDVDLTLREIMRV
LKPGGMYVFVEHVAAEDRTIRRFVQRILDPLQQFVADGCHLTRKTGEAIAKAGFSSIELQ
QAFLSSASIINPHIYGIAHK*

>g66319.t1
MQFSMLGLAQKDLSKYTNRPGTKFVTWQKIDDFVNEKIITTMPTIVLRSHTQTVPSDTLE
IVKKYVDGSMSNE*

>g71555.t1
MEIYNIRSLAELGMDHGFINQWSMNSLDELSTLSPMTATYNDNLHMHSSQPMFSQKHSME
MSPNDANRPLKQQKTSSWSSSNSDHMSNANFHVVNSSNYADHIAVVKPKEENMSSVTMRF
SPDMMASQGSYDQNQNYVFKASQGAKRVSTNAKLTQAQDHIMAERKRREKLSQRFIALSA
LVPGLKKMDKASVLGDAIKYLKQLQEKVTRLEEEARKNSMERVVYVRKYTLCDDGHDNSS
SDENFSNGPDYDESLPEIEAKFCNKDVLIRVHCEKIKGIQEKTIAEIEKLPLSIINNSAM
TFGDTTLDMTFIAKMEDGFAMPIKDLVKQLRSALKKFM*

>g77164.t1
MGNIWVWDISRPDPAVAQQLFRIISELIHYRGLRIVESSSSLLTVAQRISYCRRDDHETG
SDVDFRVVQPDFIRGGWEEITSLAERAIFVGHNGAVCVDTTSFSGVIKPNCVYFIDDGIE
ALNQGGKNMIGVYNFEVRKIECFVGVQSSSSTYPRPIWVTPSLV*

>g60479.t1
MNGGGMEYSISRPTTNNINTGGVVGGSIAGGQHAMERCGFQMPLHYPRYTKAEYETMPEW
KLNCLLAEYGLPATGDVNQKRKFAMGAFLWAH*

>g3202.t1.1.5bbdf941
MEDADSVATLMDSTSSKIKQLQKAFAELESHRAITLNWKWKQLEEHFHGLEKSLKRRFTE
LEEQEKEFETKIVESREMLQRREAAVMAKEQTSLQRLQQKRDSAVSAITTALEKHRKLSS
DEPAVNNREDHDGMPVMEDKLPDAMAAENNIRELAMPSENENVGVKLYPELVKLCQEMDS
EGLHKFISDNRKNLALMREEIPIALKAANDPASLVLDSLNGFYCSEMPNSDAKKDSNLLG
LRRTCIMLMECLGMLLTNSDEAFIPAIISADVKERAKVIAEEWKPKLDELDVDASSGNSL
EAHAFLQLLATFGINSDFDQGNLLKLIPMVSRRRQTADLCRALGLSDKMPGVIDVLVKNG
RQIDAVNLAFAFELTEQFSPVSLLKSYLNEATKMASPTKLGNTSPSAQCDVNEKELSALK
AVIKCVEEHKLEELYPLDGLQKRVVQLEKAKADKKRATEVAKPQSKRPRANGVGYGPRLA
NVATDKNFYGRMTDRYPQYVYDRPYCYSGPTDNHVSPVLGTAAYNLPHSHGNFFGAGYQY
QVAPYLH*

>g76349.t1
MHNTCISSTFQLRCKGPLSFSFNDYSCCLNDGLDRSPLLYSSLSSCCSCCANSLYGRSPS
SSPSYLYGLRQSNLIQWSAYKKLILNGLDRFNSRRFQILDVGRSCYCEKDYIFKERKSGK
RAFRRMVFEEKSEWDGFFDGSDGADEVEIMLSLLSKDVSEFCSEKERRGKSLRKIEVEKR
GNSRESHARRQKKNGDFGVVESRSKFECEEEAISSKEGKMRQKEDNRGEKVRGALSRREN
VRIRVKEDERDNLLRKEKVRKEERENLLRENRRERVKVEDGENLSSREDHRQRARKDGSS
CSSYYSFSSGDFEIENEAQVEQEDFEGEVSRGYTRDSRRNEVIVSDEDRKKYQRHVDYSK
ENEDVLRKENTQVGFSGASSAVDSDWRKKSEKRLTDVFIGETKSSKELAEKQSRYREVQE
SGYGETVGSNSRYDYKNKQSTLAVKLDKGTRDQHTQAHESETRMKSKQFTEMFDARVADT
KTSSKSGKLYHSKDESSSKLISSDRKESEHHIAAGHISNEDEYRNNSSKLAEVSEMQEMD
IRGTSSTVRQSEITMKKQEDYSNMSLTSISNREQQYHHAGQTSGLLDLRGKYHLVTQNVD
SESTLVSERETDTRMEKQEAKSSSIYKSDLELRDRLEMTTKDNTGVSVVDSGKEKTSIIT
QPPSQLVVSVSIHGESASGSATEQMADEGLHGGFTASNEHSAHRSEQAHSEPLKFISHED
ALNSADRLQKSSAHYVGEYVQKVRDQISTSELQVVKKTYETKLMLEDEQHSKDSLNSYSS
RVSQSKERDSRRLSRSSGIKGPSDEIWDVSEPSMQEHPEAGGMENESNNGKAIVKRTGKS
LWNIIGDIVRLRWASRSEHGSTAKSGGKGSPNQSTSSETWFSGHDPEENIDLETNRSRII
LTQELTSVNQQKEEKISSQSQGEVSSSSSSKGDMKQTGAGSLPSSSILQRDSSLKRASFH
PDEKTSQRKFEGSFSESGEAESSVTLPSLQLRRSPVVGEHSAAREAEGSGSGAVLGIDQP
VPITLSENPKLAGKNEELKRRKLGRNDQVVKDRFDEWEEAYRLEMEQRRIDEMFMREALL
EAKKAADSWEVPVGAVLVRDEKIIARGYNLVEELRDSTAHAEINCIREASNVLRTWRLSE
TTLYVTLEPCPMCAGAILQARIDTVVWGAPNKLLGADGSWIRLFPNGEVASGLESPDKPP
APVHPFHPKIVVRRGVMAAECADTMQHFFQLRRRKDEKPEPTTPPSCLPVSHHHPSRFLT
KIHDAFHLMFCL*

>g33374.t1
MNFGHGKRLKAGEEVLGTMMAGKNRFPEVYPAGVHPNYESEGSGSSVRLDPEVTASEYSS
APRQKWIDINSAVRNGFDVPVQVVPISKLSPSEKKSLVLRLRSELEKIRVLQRKFELLKT
NAVTVSSSSDILSCSNAQKAVPPVLDSRKSSGQVSRPVRKSSSSGNKARNWNRGTSGRFE
SVKQGTVSNPNAAMMKQCEALLKRLMAHDYGWVFNTPVDIAKLNIPDYFSVIKHPMDLGT
VKSKLASGVYTSPLDFLADVRLTFSNAMTYNPPGNDVHVMADTMKKFFEARWKGIEKKLP
GKSTQSMPDKSEVQEDSEVVKPTAPSKKRKLSPLLHAVVPEPVKPRMTDEEKCNLSSELE
SLLADLPDNIIDFLREQISNTGEPGEDEIEIDIYDLSEDALLTLRKLLDEYLKEKQKNDA
KAEPCEIELPNESGLSSSSMQVEKGNDLVDEDVDIGGNEPAVSSYPAVEIERDGVLTSNR
SDGKSDLGSSGHSDGEAETKDFTAIKPTLDESDSARTFHEKEAAEDLAEGNQAVSGLDQL
EQSFQEKPNSDESDSHQDGESASAERQVSPEKLYRAALLKNRFADTILKAREKTLGQVEK
GDPEKLRREREELEMQKKREKARLQAEAKAAEDARRRAEEEAAAEARRKREVEREAARQA
LLQMEQTVEINENSRILEDLEMLRSGPLEHLPSSVVETSPDHLQEGFGSFKFGGNNPLEQ
LGLYMKVDEEDEEGEPPNAVGSVNDDVEEGEID*

>g11552.t1
MAMDFGHLLKFSHDNLIVYGSIDAKGIMIDQDFDTKFFEFGFHQRATNKNDMIEYVHTPR
SIGNIAPEVLIERKWSIKSDVFAYGVLFLNLISKREEADERWLVKEINTGNKKSLVNDTF
EMDEHTKSRITELAMSCVAMDQTSRADMETVVKNLEDLVSHAILPKRGP*

>g9163.t1
MFSSISRHQGKPATILCFKYLLHYSSSCSSIAAPRAALKPQNRFLVEYLTNSLGFSKEEA
ISASNKVKRLNPVEKDFNIVVDFLKNTGLNGSQIKSIVSVTPQVLFSRVDKNLKPKIQFL
QGIGLFGTDLVKVLMNCKRFFLLGLNNHLEPHGNYLRNVLGSDEKLALALKRCGSLLDYN
APKRLSSTILLLQKMGFSNEKIARFIVQNPNRGLMRKPGYIEDICHRVEHDLGIARESTM
FYYGVEALSSLSKSTLEKKFGILRSFGWSDEDILKLVRNLPLTLTLSEGKMRRALDYFMK
ERGYIPDYLASHPLFFTLNLERRVKPRIKVLEIINEKELNTRKSALHWVLALPESKFVKN
YVLPHKDILPDMWEQYVQSVGGHKVEEL*

>g21234.t2
MNPFSSGTRLRDMIRAIRACKTAAEERAVVRKECAAIRAAISENDQDYRHRNLAKLMFIH
MLGYPTHFGQMECLKSIASPGFPEKRIGYLGLMLLLDERQEVLMLVTNSIKQDLNHTNQY
IVGLALCALGNICSAEMARDLAPEVERLLQFRDPNIRKKAALCTIRIIKKVPDLAENFIN
PAASLLKEKHHGVLLTGVQLCTDLCKVSAEALEYFRKKCTEGLVKLLKDLANSPYAPEYD
IAGITDPFLHIRLLKLLRVLGQGDVDASDCMNDILAQVATKTESNKNAGNAILYECVATI
MSIEDNGGLRVLAINILGRFLSNRDNNIRYVALNMLMRAITVDSQAVQRHRATILECVKD
SDASIRKRALELVYVLVNESNVKPLTKELIDYLEVSEPEFKGDLTAKICSIVEKYSPEKI
WYIGQMLKVLSEVHVKFADCLSCWF*

>g12258.t1.2.5bbdf936
MCMHAVGGLLNATCGNATELIIALFALQQRKLDVLKYSLLGSILSNLLLVLGSSLLCAGL
VNLKMEQTFDRKQADVNSLLLLLGLLCHVLPLMFGISIEPINHTDDSVLWLSRTSSILML
VAYSAYLFFQLKTHRKPLESEEEEDELSENEAVIGFWSAFIWLVTMTLAIAVLSEYVVGT
IEAASDSWKISVSFISLILLPIVGNAAEHAGSIIFAFKNKLDISLGVALGSATQISMFVV
PICVVVGWIMGIPMDLNFSLLETSCLGFSVILTAFTLQGGNSHYIKGVVLCLCYAVIAAC
FFFHKVPAKT*

>g71689.t1
MAKKRKSVVTSLDEVDRSMYSTFCSAANSLSQLYTQAMNQQKLSFQAGERDGLEKLYQWI
VRQQEGGSRVTTSDVLNYLQSELDYSGEEPPVSPRTPGQHQHLQSAQFENSGFLVSTGSS
GLPASALGFRSDPFDQQPRNYVFSNALSSPVRRSLQNYNISPGSYFQNNVQPSTHGNRSS
EPNFVHQQSRDPNSVNSNDSAMDMHADSPGHESTY*

>g46755.t1
MTCVRAVKDLYFATSSFQHLQYHSYSNNVKKIIVSQFPSHQRKYSTSYSVLSSEMVSNET
HPILRSSGLQHWFKNWQELRKHKLTASTFSGAVGFWPNRRVQLWLEKIGAIEPFSGNLAT
CWSNIKEEEALERYKLITGNSVSFPDFQVYGKINHEDDWLAASPDGLVDNLVYGLPSRGV
LEVKCPFYDGDMTKAFPWRRIPLHYIPQAQGLMEILDRDWMDMYVWTVKGSSLFRLYRDR
EYWDALKIALSDFWWKHVHPARELYNNSAISNPLSELRSLKPAPKHELCSFIVYESKRKV
DNSRLLMREIHGKLEH*

>g55505.t1
MASFSQYLSDYICSNHEFCDLPTPMTSSEGSASTMHGELSLPNFSDNGAVTMVPFDSDIS
SSVSMAALLLPERLGVSDMSTSATLPNYDGGLHAISGNEGFTADQHDQPYDFGDQECSVL
PSNFWPLYPIPMTGDNYWEIQGGMAQRVEEPTLKIARYSAEEKKDRIVRYLKKRSQRNFN
KTIKKIWFVYVRNFLSINLAAVNDKPPQYACRKNLADKRVRVRGRFAKNNELCEDDQTLV
MKTDHNLQEAEQSCYHDPFQMKSHDEEWLQESIASLMYYRMLPDNIMELPE*

>g961.t1
MARCSSSCCSPKFLLVLFIISAIPIGYLIRLETAKPANHVYEYYSPGWIRESSKWDDVNN
RFIVSFFEGGMGIVPIDPVESTYYSTKMLEEIQVVKDTDLAGNATLGFTIDRPRNRVVVC
IADALGNRYSALAAYDMTTWKRLFLTKLSGPEDEKALADDVAVDEEGNSFVTDAKASKIW
KVGAKGEFLETIRNPLFTPDGWQNQFVQINGIIYHPNGYLLVIHTMAGKLYKVHIGKRDD
EQQQVVVELVRVVQVEGCSLKFGDGLQLLSPTKLVVAGNPTRLVESKDDWDTAKVLGVTK
GASHRIVTAATVKDGRVYLNHFFGLGYPKRKHILMEAVFRSYNE*

>g47062.t1
MDSFNSDDDDYECRFFDAQESIASVSDSGLGCSGSHDSDSGVDNWESGSFRYDIWMRSPL
SVRERRRKFLRWMGVNLDRVPGDYCIDIYGDIDICSGQSDRLLENCGAVLRNSNFEGEFS
SSRSSVSSWSTDALDSLRELSANEKFVRSWNSDGKRECNINEVVENGKLSKIQAVGLNHL
QTPERFENTYGVQAINQQFVQREIEDNENSAAIMNRLKSWWLRRIRSMTCMMSQPGHAEN
RGNNGSNPTIAAKVQRVKVRYNRKQLKELSALFKGQDIHAHEGSILTMKFSFDGQYLASA
GEDKVVRVWQVVEDERANETDIPDIDPSCLYFTISHLSELAPLMTDKEKISKLKSLRKTS
DSACIIFPPMVFRILEEPLHVFRGHTAEILDLSWSKNNCLLSSSVDKTVRLWKVGCNQCL
KVFPHSNYVTCTQFCPINDDYFITGSIDGKVRIWKISARRVVDWSDTKDIITAVCYRPDG
QGGIIGSMTGTCHFFNVADDRLQVEAQMCLATKKKSPCKRITGFQFFPKDPSKIMVTCAD
SQVRILRGSNVIRKYKGSRSLGNQISASFTSDGKHIISASEDSNVYIWNSFDLDDSSPSQ
PKNVRAFECFYGDASVAVPWLGLKTGNSDKSQQLFGFDQDSTVKLPFSLGQEFFLESIPR
GSATWPEEKLPASGSQMVSSVLSKSQYKFLKTSVQSSLSSHAWGMVIVTAGWDGRIRSFH
NYGLPIPL*

>g51980.t1.1.5bbdf93c.1.5bbe1a03
MCADNAELYAKVGVPFVLGTTGGDRERLYKTVADSNVYAVISPQMGKQVVAFLAAMEIMA
EQFPGAFSGYRLQVMESHQASKLDTSGTAKAVISCFQKLGVSFELDQIQQIRDPKLQMEM
VGVPEEYLAGHAFHMYHLTSPDETVSFEFQHNVCGRSIYAEGTVDAILFLAKKVQSKADK
RIYDMIDVLREGNMR*

>g51030.t1
MDLEGDEIKRTQEERRKMEQELASLTSVTFDTDLYSANRFEGYEKSIPVNDEDDVGDAPD
NEIARRLNSYTAPKEFLKDVGRTGNEDDVGFKQPSKIIDREDDYRRRRLNRVISPERVDP
FMDKTPGPEVRTYADIMKEEALKRKKDDVLKAIAKKKEEEEGNKAAAGKEKEAEKPKKRN
RWDQSQDETTAKKAKGGSDWDLPDSTPGIGSGRWDATPTPGRIGDATPSVRKNRWDETPT
PGRLADSDATPAAGGVTPGATPAGMTWDATPKLGVMATPTPKRQRSRWDETPATMGSATP
MSNATPAAAATPGVTPFGGAELATPTPSAINLRGAITPEQYNLLRWEKDIEERNRPLSDE
ELDAMFPQEGYKILEPPPSYVPIRTPARKLLATPTPIGTPLYNIPEENRGQQFDVPKEMP
GGLPFMKPEDYQYFGALLNEEDEEELSPDEQKERKIMKLLLKVKNGTPPQRKTALRQLTD
KAREFGAGPLFNRILPLLMQPTLEDQERHLLVKVIDRVLYKLDELVRPYVHKILVVIEPL
LIDEDYYARVEGREIISNLSKAAGLATMIAAMRPDIDNIDEYVRNTTARAFSVVASALGI
PALLPFLKAVCQSKKSWQARHTGIKIVQQIAILIGCAVLPHLRSLVEIIEHGLSDENQKV
RTITALSLAALAEAAAPYGIESFDSVLKPLWKGIRSHRGKVLAAFLKAIGFIIPLMDAIY
ASYYTKEVMHILIREFQSPDEEMKKIVLKVVKQCVSTEGVEPDYIRNDILPEFFRNFWVR
RMALDRRNYRQLVDTTVEIANKVGVADIVGRIVEDLKDESEPYRRMVMETIEKVVANLGA
SDIDARLEELLIDGILYAFQEQTSDDANVMLNGFGAVVNALGQRVKPYLPQICGTIKWRL
NNKSAKVRQQAADLISRIAVVMKQCGEEQLMGHLGVVLYEYLGEEYPEVLGSILGALKAI
VNVIGMTKMTPPIKDLLPRLTPILKNRHEKVQENCIDLVGRIADRGAEFVPAREWMRICF
ELLEMLKAHKKGIRRATVNTFGYIAKAIGPQDVLATLLNNLKVQERQNRVCTTVAIAIVA
ETCSPFTVLPALMNEYRVPELNVQNGVLKSLSFLFEYIGEMGKDYIYAVTPLLEDALMDR
DLVHRQTAASAVKHMALGVAGLGCEDALVHLLNYVWPNIFETSPHVINAVMEAIEGMRVA
LGAAVVLNYCLQGLFHPARKVREVYWKIYNALYIGAQDALVAAYPMLDDEGNNVYSRPEL
LMFV*

>g68657.t1
MSASSKFDLSCNSPDRPLYSSGQRGSYAAASLDRSVSFRENLESPTLPAIANMTRGSSTA
TQGDVMSFFQCLRFDPKAMVTDHKLNRPVDFKRLASVSLGIPLEDSPSVPAKGKPVPSPS
PEQFRRLRASIRDGCRKARERVKIFNESLSVMNKWFPIPSRKRSRSDALSSDRSNAFYAA
DRSVSGTSMTKMGAQSHVSINGFEVEQKSEERTKNSLPNKRTRTSMVDLRMDARANTPAR
PSGTADRDREVLKIPNSSAVQSEDRTLPVGVDGWEKSKMKKKRSGIKQDGAASSVAAKPI
DGSRDSKQGMQPRLLTDARSRLSDNHGFRPGIANGGVGKTDGAPQQIGSGTRSSIARIEQ
DNSPLLYEKRDRPLEKERVTLKAINKTSAREDFSSGSPTSSTKLIASARAPRSGSSVGPK
SSPVVSRATAANDWEISQCTSKISAAVGVNSRKRTPSMRSSSPPVAHWASQRPQKISRTA
RRTNFIPIVQSNDESSVLDTTSVGIGNERRLSGSSPQQVKLKNDTTSSAALSESEESGTA
EMKFKDKTKKSDDMDEQAAQNVQKMSNLMLPPRKNKVISGEDHGDGVRRQGRTGRGFTST
RSLMPLTGQKLGNLGTAKQLRSARLGFDKTESKAGRPPTRKPSDRKAYTRQKHIAVSAAA
DFLDDGHEELFAAANAVINPAQALSGSFWKQMEPCFRFVSDLDVTYLKQQVDSEPNAASP
VPASSGMENNSLVANGFGSNEIGRGGIIKTQSGSQDYLSCGTKTLDEVSLYQRLMSALIQ
EGDDEFCCSSNEDLRFDVCDSGFELETNLSSEGLPALLSQNSDLSRNPVSNGYMMNANGR
SFNELEHVLPDNNGMSISNTGTIPSYNNSQNGSLPECTVGQYNNMSINERLLLEIHSIGI
FPELAPDFAHTRDEEISSEVCKLNEIYSEQVSKRKGLICRLLKSAAETRELQNKEFEQHA
LDKLVIMAYEKYMACWGPNAHGMKSAGGKMAKQAAFVKRTLVRCQEFEETGKSCFNEPLY
RGIFLAGCSRLGDELTGDSIDGESGKHGVRPIRTSMSAQQSPSLANQEMYLSDNPPSASE
QFTGKEDILSNRVKKKELLLDDVGGGAIGVSSAVPSGIGNSFSSSAKGKRSERDREGKGG
SREVMSRSGTTKLGRPTSANFKGEKKSKSKPKHKTTQLSASVNGLLGKMPEKPKGTLPST
QKTSDASSRGIGKDKSDYSLDELEDPIDLSGLQIPEMDDLGVPDDLGGQGQDIGSWLNID
DEALQDHDFMGLQIPMDDLSELNMMV*

>g64255.t1
MLFQLSLRSCGLTGEIPLWISAQKDLVYLDLSYNELRGTFPLWLAEMDLGTLILSDNKLT
GAVPPRLFQSLSLSVLDLSRNNFSGELPENIADATEIMVLLLAGNNFSGTIPSSISDIYR
LLLLDLSSNRLSGDTFPVFAPDAFLAYVDFLNNEFSGHIPVTFLKETRILSLGKNKFSGT
LPPNLTNLIKLEHLDVHDNPIAGEFPKFVIEMSSLQILVLRNTCHRGPIPNSISKLRNLQ
ILDLSSNNFTGNIPPEFGNLVGMIDTPTTFSTIGDVFAFSEKYFDPKVYWNSDLTVNWKR
SLQRLPSYPSINIYSLLDLSKNQFSGKIPASLGNLKGLKILNISSNSLSGKIPYSLGRLE
RVESLDISHNNLCGKIPQSFEKLQQVTILDVSNNHLEGPIPVGGQMDTMNDPNYFANNSG
LCGLQIGLICPVEPSPPTSEDTETKESRFAWEGAWFGFPLGFCLMFILITGCFPAKAVYP
ARRGLQRKHTPSRISVR*

>g29043.t1.1.5bbdf933.1.5bbe19f9
MVCALRSQRMAALARLLTSSQATADDFGHQKLASQYIHRELWEADEANLIDEKDMHVFDL
RPMTDPLHLVCCNACRKPIKASQYAVHAELCSSLTCTEEIGLELDGGPGNKKPVRKDRKK
FLAVNSNQTATVIDQEKFEILDASDRFAPETHWEAPAAESKNGPAILDGLGTGPQNTNFL
GSATSHPKKRAKLSKADGPSPILDHLEAANGAISQETLFCKA*

>g60820.t1
MLTPDQARTLAGIWPESKSFNDYGLGPVPSNFKGQCQTGEMFTLANCNREWTSESFNRTF
YRSPRDGGGHGTHTASTIAGSLVLDVNLLGLANGTARGGAPSARLAIYKACWFDICNFAD
VLLAFDDAIGDGVDILSLSFGPNSPQASYLLDVMSIGTFHAFRKGIVVSASAGNDGLPRT
AINVAPWTITVAASTLNRELQSSIYPGNSKVLKLLPDEHPNLIKGKIVVCKLENNNVDWI
QMRIYIRSTGGVAMIVVDPSAQDILFNFGIQATVIGQEEATELQTYISTDKNPLARLPQT
FTLVSTEPAPAMAMFSLKGPNVVTPYIINPDVTAPGVNILAAWSPVALGNAGGRSFDYNI
ISGTSLACPHASAIAAIVKSCHPSCSPAAIKSAIMTTAIDPGLVYGFDSNDTIAFLCSNG
ATFAQLKIFTGEALFCKNTPNPSYNFNYPSIGVSNMKATCQFTELLLMFTNTGEKLTYRI
DFTPSKISNGSFVFGSLTWSNGVHRVRSPIALNVLSLQD*

>g32473.t1.1.5bbdf937
MGCCRMEMESGKLFIGGISWDTNEDRLREYFQAFGEVVEAVIMKDRNTGRARGFGFVVFA
DAYVADRVVKEKHVIDGRTVEAKKAVPRDDQQNLSRSNGSIQGSPSPARTKKIFVGGLAS
TVNESDFKKYFEQFGTITDVVVMYDHNTKRPRGFGFITYNSEEAVDMVLLKTFHELNGKM
VEVKRAVPKELSPGPTRSPLSGYSHGLNRVNNFLNAFPQGYNPSSMAGYGVRMDGRFSPV
TVGRSGYLPFNSSNFAMGPNLDSGLSSDFGGSGSYRPNIGYGRGLNPIQSVYSNRFNSPV
GYGVGIGGSGSLVNSASRNMWGNGSFNYENNTGNSNDFVGSGTGNTELLSAFGNIGAIWG
SSPGSGQGEGTGSFGGSNINYGNGEDSFMAGAGYGKVSGSNVEAKSSYAARVDSQDMAFG
NLYGSGSIYDEPTWPASSPELANSGNFSYRLGDATSNVTPNNSVGYVGDYSVVSRSNRGA
*

>g52421.t1
MRPIISVIQTANVEPGSTVAIFGLGAIGLAVAEGARICGATKIIGVDINPDKYEIGKKFG
ITDFVNSTSCGDKSVSQVIKDMTDGGADYCFECVGRASLVHEAYASCRKGWGKTVVLGVD
KPGSQLSFESLEVLLSGKTIMGSLYGGLKPKSDIPILMKRYLDKELELDKFVTHEVNFED
INKAFNLLLEGKSLRCVIWMNK*

>g16978.t1
MWDEMGLVRVYTKPQGQQPDFTDPVVLSADRGGCTVEDFCNHIHRTLVKDVKYVLVWGTS
ARHYPQHCGLGHHLQDEDVVQIVKKKEKEDGGRGRFKSHSNAPARISDREKKAPLKT*

>g34070.t1
MAGESSANHSNGNLGAHPDARRTYQVVVAATKNMGIGKDGKVPWRLPLDLKFFKDITLTT
SDATKKNAVVMGRKTWESIPVDHRPLPGRLNVVLTRSGSFDIATAENVVICGSMLSALEL
LAASPYCLSIEKVFVIGGGEILKESLNAPGCDVIHLTEIDADIDCDTFIPAIDSYVFQPW
YSSFPSFESKLRYSFTTYVRVRKSEAEYFNQTNGVIPDNDLGIAKIEIKTFSFLPKMIFE
RHEEYSYLRLVGDIISNGMPKDDRTGTGTLSKFGCQMRFNLRKSFPLLTTKKIFWRSVVE
ELLWFISGSTNAKVLQEKGIHIWDGNASRDYLDSIGLGEREEGDLGPIYGFQWRHFGARY
IDMHTDYTGHGFDQLLDVIGKIKNNPDDRRIILCAWNPSDLKLMALPPCHMFAQFYISNG
ELSCQMYQRSADMGLGIPFNIASYALFTCMVAHVCDLVPGDFVHVIGDAHVYRTHIRSLQ
DQLQKQPKPFPVLKINPQKKDIESFVPADFTLLGYDPHQNIEMKMAV*

>g20611.t1
MGSSWIWQFSQNHSYSSYNQNTGNEIIEFHNSRDQEIKFSWDSSSSNQKISDKHSICTSI
REEPEKEKHYIGIRKRPWGKYAAEIRDSTRNGMRVWLGTFNTAEEAALAYDQAALSMRGP
TTVLNFSVDRVRESLQEMPCSYQDGSSPAAALKEAHKMRSKLKRKGKGKQVKKEDVLELE
DLGPDLLEELLSETNS*

>g58517.t1.2.5bbdf93e
MSRAIFKSTLLIGISSCSSQLLKFPYINFQTFAKFPFSSSSSSSRVSPMATSERPAAASS
ASAPSRSAASAIDFLTLCHRLKTTKRTGWVKREVENPESIADHMYRMGVMALIAADIPGV
NRDKCIKMAIVHDIAEAIVGDITPSDGISKLEKSRREREALDHMCRLLGGGPRAKEIADL
WTEYEENTSLEAKVVKDFDKVEMILQALEYENGKPCRIYSTKYFSYC*

>g32813.t1
MSKEEFLKIQTCVLKVNIHCDGCKHKVKKILHKIDGVYKTNIDSELGKVTVSGNVDPETL
IKKLAKSGKHAEIWGASKANNNQQNQLNNQFKNLQIDSGKGGNNKGQGGGGGGQKGGGGG
NNQQQPKGGGGGGPIGGQGLNPMQLQQLKALQDKMPQLNPMQLQQLKALQDKMPQLKDLK
MPPSMPFGNNNKKDQNNQKSVKFMPPPEDEDLTDDEFDDEDYDDEEFDYDEIEDEMDDIP
PLNNKMKPAMVPQAMLPNMLMNNGGNNGGANGKKGGPGGGGGGNIPVQMNLGGGGGGGNN
NGGGKKGGNGNNNQNQGGGGGGGGGAGQKGGKNGGGMQNGGGGGGVGGQNKNGNNGHGGG
GGGGGGGGGGNPNFNANGAKKGGGMNDGLHGMPNMMAMNAAGGGNVGPSMGSIPMGQMGH
MGNVPMGQMGQMSQMGQMSQMGQMPNVAAVQGLPAPAINGANAGGYFQGAGPEMMAGNPY
YQQQQMAAMMMNQQRANGNERFQPMMYARPPPAVNYWPPHPYSSYPYHAPPPGEHYTDAF
NDENTSSCSVM*

>g18971.t1.1.5bbdf93b
MDFESNSWIWEGMYYYPHLFGGLMLTAALLGLSTSYFGGIGVPTVPYLLPGFGIFHMKRR
GKKPIRVYMDGCFDLMHYGHANALRQAKALGDELVVGVVSDEDIIANKGPPVLSMEERLA
LVRGLKWVDEVIVNAPYAITEEFMNQLFNKHKIDYIIHGDDPCLLPDGTDAYALAKKAGR
YKQIKRTEGVSSTDIVGRILSSAKDVKVIEDHSTIPNLDKSDSGKRVSAQGGQAKVGHIS
HFLPTSRRIVQFSNGKGPGPNDSVVYIDGAFDLFHAGHVEILKTARQLGDFLLVGIYSDQ
TVSEIRGAHFPLMNLHERSLSVLACRYVDEVIIGAPWHVTNDMIKTFNISLVVHGTVAES
SSSLNVNSDPYAVPKGMGIFRELKSPKDITTTSVAQRIIANHEIYMKRNAKKGASEKKYY
AEKKYVSGD*

>g65440.t1
MVKFCRGLPLVVVVLGGILATKHSYNEWKVVSKNIKSHIGKGDSIEQCQSEVQKILALSY
NDLPCKLKPCFLYLSVFHEDEEIKVERLYYLWPAEGVVFAEDGNGEEYMVDIAERNLGEL
EK*

>g9209.t1
MWRSLWRSIDRFSLPYFRYTIKELREIKVVDNHNRQLVVDLLQSVAEIVAYGDRHDPSIF
ECFMEYQVLAEFVRMLKIGGNSRIEAPLLHYLSIMIQNLENEQAIYYCLSNGYINSIITH
KYDFDEGDLIPYYVSFLRAVSGKIDRDTICLLVKVHQDAIVSFPLYDEALKFAHHGEKMI
QIAVRALTLNIYSVADEMVYQFLTTPPVSEYFSGLILNIKKKCFDIDALIRWSNGKLLWK
EKRTSSGN*

>g20130.t1
MDTKSGAAMVAVLLLLLLSPAVFSASNDKLIRVALKKTKLDQISRFSGNVDITEGGFPRI
NRHRGNVVQSDTDIIALKNYMDAQYYGEIGVGTPPQKFTVIFDTGSSNLWVPSAKCYFSV
ACYFHSKYKSSHSSTYKKNGKSAEIHYGTGSISGFFSQDHAKLGDLVVKDQDFIEATREP
GITFLAAKFDGILGLGFQEISVGKAVPVWYNLVNQGLVQQPVFSFWFNRKAEEEQGGEIV
FGGVDPNHFKGDHTYVNVTQKGYWQFNMGDVLIGGETTGFCAEGCSAIADSGTSLLAGPT
TVITQINHAIGASGIVSQECKSVVSEYGKTILEMLLAKAAPQTICSEIGLCSSDGSHDIS
SMLIENVVEKDTGTASDGLHDGMCTACQMAVVWMQNQLRRNQTEEKILDYINQLCDRLPS
PMGESAVDCSALASMPRISFTLGAKTFELAPEQYILQVGEGAAAQCISGFTALDVPPPRG
PLWILGDVFMGQYHTVFDYGNMRVGFAEAA*

>g52374.t1
MGSKICMNEMCRLTTSPEWKKGWGLKSGGFATLCSSCGTAYEKLIFCDTFHPDEDGWREC
RICRKRIHCGCVASKLLHECLDLGGVGCVSCVKRMDTSSIRPVQILKDEIPNGTLTRDMQ
PSLENGIGQRSFGELLLISKNVDVNGAKKLLNSQKYTTALGQRKGEGTVLPFDEVNTCSP
NLTEQSVGSSMFVKPDNSRSHQGSQPSLNFSLSNPLGSSSSVLPFSDGIVEGSEQNKVSP
NQQGQRARHILPKPPKPGSTVSSEATKGVASQTRIARPPAEGRGRSQLLPRYWPRITDQE
LQQISGDLKSTIVPLFEKVLSASDAGRIGRLVLPKACAEAYFPPINQSDGLPIRIQDVKG
KEWTFQFRFWPNNNSRMYVLEGVTPCIQNMQLQAGDTVTFSRIDPGGQLVMGFRKSTTNV
DTQDPQPLVLPNGGSSGETSYSGASDNMLGNGSHTVEDPLQRHMLSPEKKKTRNIGSKNK
RLLMHSDEAMELRVTWEEAQELLRPPPTNSPTIIKIEDYEFEEYDEPPIFGKRTIFTVQP
SGHQEQWAQCDSCSKWRRLPVHVLVPAKWTCSDNMWDSNSSCSAPDEINPREVEALNKAT
KDYKRRRISESKMVEECEPSGLDALATAAVLGDNIGDLAENSVGATTRHPRHRPGCSCIV
CIQPPSGKGKHPPSCKCNVCLTVKRRFKTLMLRKKKRQSDREAELAQGKDQHASLDISEM
EGTSEHAVLQTTHSDTERSQNGNLMEVGDNNKGQLDLNCHPSREDDMLAEAAAGMNMASL
MNAASIPLDMYMLQNGAASTSPRLLPHVPGEGEGPPPDEDCSQSADAGPEKKGSDS*

>g52358.t1
MGQHKECRWWKRKLELDEEASKRESWQGRRKTGGARIIDQGTPQAIPFVLLEKYKTVSLT
SSSIKQIILLVRSTQTICPVMQEVELGKALPPAYINKDAKIPLSAIPLSSPSHTHMGSYS
GLDEAGERLLVVDVNENEYGNESSEVKIQIRDLSKVSEQSVPILSKVNVDIPRAVIMGVI
GPSGSGKSTFLRALNRLWEPPSKTVFLDGKDICGLDVLGLRRRVGMLFQLPALFEGTVAD
NVRYGPQLQGKKLTDNEVYNLLSLADLDSTFFSRSGGELSVGQAQRVALARTLANEPEVL
LLDEPTSALDPISTQNIEDVLVKLKKERGMTVIMVSHSIKQIQRIADVVCLLVGGEIVEI
LKPDKLSEAKHPMALRFLQLSN*

>g71766.t1
MEGVGARLGRSSTRYGPATVFTGRVRKWKKKWIPLTPTNSSNHHQTAANGSTNGNNGSHL
LLYKWTPITPSQNGNGNGKSNGDNNDESKNSSKDDAVAAEEPPKRKFKYIPVAVLEEQKN
EALEQVEDEAKPMETETDGVELTSKSDGLEEKPDINDVPAEESQASENDPLGRQDLNEST
LDLSLGLKAHDGENGCDSKIDQNKDG*

>g76202.t1.5.5bbdf93e
MRMESSEEEDDFPAIESVTPQSKIDTVHQSNTEKGIRKICFELLDLKDAVENLRGNMRTK
YSAFLRLSEEVVEAEHELNDLQKHISAHRILLQDLMAGDSQGLEEWILANDDMQEAEHGP
QNTDLDATFSTEKVDQSMIILENIDVLLAERKTDEVIEAIDAEERSHPELKTSVDMSVTE
SSFYRTALSKRKLMLENQLVETTMQPSISIGEIKKTLSGLLKLGKGPLAHQLFLKSYGSR
LQKSIDAFLPLCPCYPETYSTSLSNLVFSSISLTTKESAMLFGDNPVYSNKIVQWAEGEI
ELFVKLVKEHAPSSDTASALHAASVCVQASLNHCSALEPQGLKLSKLLLVLLQPYVEEVL
ELNFRRARKQILDFSKSDGRMPLSPRFASPLTTFATSSDSLLVASGIRFIFIIKEIVEQL
THLVILHFGGNILTRISQLFDNYMDVLINALSSTSEDDSLTDLKDVPFRAETDSQQLALL
GTAFTIADELLPMVVSKMWNILGESKEAGIGPMESVMPSANNTLEFKEWRRQLQHSLDKL
KDHFCRQYVISFIYSRDDKTRLDAHIYLQGKEQDLLWSSDPLPSLPFQALFGKLQQLATV
AGDVLLGREKVQKVLLARLTETVLMWLSDEQEFWSVLEHDSAPLRPLGLQQVFKSLLPVF
FPLKFMKIRLV*

>g64538.t1
MTIESIKPTKEKKSRKSKQAVVDEKSPLLPTKHEEDGGFDEFDGASFSGAVFNLSTTIVG
AGIMSLPATMKVLGLILGIAVIIFMAFLTEASIGLLLRFSRASKSTSYGGLMGDTFGKYG
RMLLQLCVLVNNVGVLIVYMIIICDVLSGSTSSGIHHPGVLEGWFGAHWWNGRFFVLLVT
TLAIFAPLASLKRIDSLKFTSALSVGLAVVFLVITVGITVFKLISGTISMPRLLPDVYDL
TSFFKLFTVVPVLVTAYICHYNVHSIDNELEDNTQIKAVVRTSLALCSSVYVMTSLFGFL
LFGDATLDDVLANFDSNLGIPYSSLLNDAIRISYAAHLMLVFPIVFYPLRLNLDGLLFPS
ARPLTSDNLRFALISIGLIGLTFLGANFIPSIWDAFQFTGATAAVCIGFIFPAAITLSDR
YGIATKKDKILCIFMIALAVFSNLVAIYSDAYSLFKRNASPRE*

>g28453.t1
MRLCISCVRLLIILVALVVGLVTPTNVAGRLESEDGYQYKPLYSKGASNYPPPSRGYQPP
LTPHTPPPYHSHIPPPPYGVPPPFHRYPPPPFHGNQPPSRGYAPPPFQAKQPPPRHGHPR
APPPKQYTPPSQHQPPSHHHHHHHIPPPKHHGHAPPSHQHPPSSAPSHGHFPPPSYPIYP
PPPQSHQPPSHHHHQPPSHGHKHPPQSHGHKQPPQSHGHKQPPPPTHQHKPPSHGHQPPS
HQHTPPKYGHAPPTHKHPPPSPYSPPFPPQGPPSQSPPYSGQPPPAPYNSPPPSRRQPPP
PSPYHHGRSPTPSPYYGPSPPLNPPTPAPTPYVPNHVVP*

>g53310.t1
MVFFVAATVFTMLKLCGDIGAFGWWDLLVNYGIAECFAFLVCTKWSNPMIHRNPNAHEAS
TSSNAIRYLDWNSGLVVSEENNSSNGMCGFQDIGGHIMKIPIIGFQVLLCMRLQGTPPGA
RHIPILMVFSPILLLQVVAVLFAASRFVEKLVNLLRHGDYTGRYFVLTSGVCDCFGFLCH
GSRLLGWWSIDESSQEEQAHLFHNGASGYNTFCGYPPEIVKKMPKKDLAEEVWRLQAALG
EQTEITKFSRQEYQRLQNEKVLCRVCFEGEINVVLLPCRHRVLCSNCSDKCKKCPICRVT
ITKKLPVYDV*

>g49921.t1
MGRSPCCDKVGLKKGPWTPEEDQKLLAYIEEHGHGSWRALPAKAGLQRCGKSCRLRWTNY
LRPDIKRGKFCIQEEQTIIQLHALLGNRWSAIATHLPKRTDNEIKNYWNTHLKKRLAKMG
IDPVTHKPKTDAILSTDGQSKHAANLSHMAQWESARLEAEARLVRQSKLRLNSLENGCPL
GSPEFSSPSSPQIKPAVVPAPGPPRCLDILKAWNSVWNKPNEAGTDASGGAAASVAGLGG
DLESPTSTLSYSENAPQMSSNGIGDNSTAFIEFVGNSSGSSDGGITKEEGEEDWKGFDNS
MSFTSGLQEMTMPVDGSPTTAWASADSLTLNLDHHHAPRGVNFVERFTDLLLSSNSGDRS
FSEGCGESDHNGDVSGSDAAAPGIDYLEDNKNYWNSILNLVNSSPSDSPVF*

>g35728.t1
MLLPNPSSSSNSPLQQGFHHHQVNSTSPAGGPFGPSSHQFTWVPDGGSGGGTEIGGVVEG
QGLSLSLSSSLQHLEAAKAEELRMGDGAMLFFNPGGGSNTSGVQYPFKNLGGSHHQQLHM
QGGGVVGQNHQVFGSSLGVVNVLRNSKYAKAAQELLEEFCSVGRGQLKKNKSGRNNSTNP
NSNPSGSGGGGANTGGGNSSSSSKDLPPLSAADRLEHQRRKVKLLSMLDEVDRRYNHYCE
QMQMVVNSFDLVMGFGAAVPYTALAQKAMSRHFRCLKDAIAAQLKHSCELLGEKDASTSG
VTKGETPRLKLLEQSLRQQRAFHQMGMMEQEAWRPQRGLPERSVNILRAWLFEHFLHPYP
SDADKHLLARQTGLSRNQVSNWFINARVRLWKPMVEEMYEQEAKEEAEEREGNQSNGNNI
AQTPTANNNSTTTTTTPSSTALTAATTATASTTASAAAITATGKRSEINDSENDPSFFAI
NRQCFSENPNNSSSTTSTSIMAISNSLATPTVTPPFSSPSFPTNYESEACRRTGIVTSGN
AEMGSSLIRFGTSAGDVSLTLGLRHAGNLPDKSSTFSVRDFGGC*

>g5261.t2
MARRHGWQLPAHTFQVVAITVFFLLSVAFYAFFAPFLGKDIYEYIAIGIYSFLALCVFIL
YVRCTAIDPADPGILIEPDKTLTHGSQNNSELPAEPSKVGLNNGGKSEQYDSGCCSTVGG
VFCGFLVKADCRKDEDHLQEPNGEEEALFCTLCNAEVRKFSKHCRSCDKCVDGFDHHCRW
LNNCVGRKNYITFVCLMAASLVWLAFECAVGIMVLVRCFADKKATEHEITDRLGDGFSRP
PFATVVALCTAVSFLATVPLGELFFFHIILIRKGITTYEYVVAMRTQSEPPGPSIDGEEQ
QSLPSSPTSSAVTATSGRSSLGKGLQYKGAWCTPPRIFMDHQDEIIPHLEPGRLPSTVDP
DALQADKGKKIAQRPVRISAWKLAKLDSNEAIKAGAKARASSSVLRPVSSRHHQYDGDHL
SSANMSGISSPTSTNQGFYERNARAGTSRLSSTKSSYPPSRASKEDVETCGHSVSNLSSP
PAANLTASPLGPESSNRDHFNPMYQSSAEQSPWSAKASGGNEATDRDNLNQNPARKNNPG
VTENLKSSVYWDQEAGRFVSAATRNTGSSSSQISGTELTYTGQSIFFGGPLVNEQLGRGT
RSGSALAAGPQRSSASSYYQQGRSQRGGQLPVFVPSDSQQNHFSSRFQ*

>g54507.t1
MSSEFRSEGSCMELLKTLGREEILEVLSQSLCEHCDTNLLARIESIAKGKQVDISDPGYD
ATTKSEEFQTADAKPTTQSYMKTSDSVFKRRDAFGSSNWSPTSMNRNRSASKYLDSNKTI
IDFGLSEDQELIRFQNVGRMKDFCLIERINGKPKNVLQGLELHTRVFNSEEQMKIVDCVL
QLQRKGQNGQLRKHTYSEPRKWMRGKGRVTIQFGCRYNYAQDSNGNPPGIVRDEEVEPLP
PLFKEMIKRMVRWHVLPPDCVPDSCIVNIYEEGDCIPPHIDHHDFVRPFCTVSFLSECNI
LFGANLKSLSPGEFAGPFSLPLPIGSVLILNGNGADVAKHCVSSVPSKRISITFRKMRAT
KIPYTHVLDPQLSAIKPLEVYLSRK*

>g8025.t1
MANDKEMSAPVMDGHDTVTGHIISTTIGGKNGEPKQTVSYMAERVVGTGSFGIVFQAKCL
ETREPVAIKKVLQDRRYKNRELQLMRTMDHPNIVSLKHCFFSTTTKDELFLNLVMEYVPE
SMYRVLNHYSNINQRMPLIYVKLYTYQIFRGLAYMHNVAGVCHRDLKPQNVLVDPFSHQV
KICDFGSAKVLVKGEANISYICSRFYRAPELIFGATEYTSSIDIWSAGCVLAELLLGQPL
FPGENAVDQLVEIIKVLGTPTREEIRCMNPNYTDFRFPQIKAHPWHKVFHKRMPPEAIDL
ASRLLQYSPSLRCTALEACAHSFFDELRDPNTRLPNGRHMPPLFNFKQELSGAHPDLINR
LVPDHIKRQMGTQFMHPTIT*

>g61215.t2
MELEHKQGVLVKIASVREVVLGAPLRVFLKQLASGTVASDIDKVVALVHRPMESFFLFPR
LEKVTAVFPMRFKASTDILLATSFLQEFVDARRTAGLNNAPPCSWSQSPPSELKGAPVEA
LSANAGFISFGKKLDRTVWGLLTFHAYVSHHVKLYQMGTPFHILWTRLLDLFYPSLIINS
HSISVKIFFAQKLSCTHALDCAKPDLEKAKKVTQNRSFKRLSLKDGRSSLKAFS*

>g72096.t1
MSAKIQPSLTDENRDLQKQIGCMNGIFQLFDRHYFLTGRRSTGHNHKRLLPGANNSRETN
NATEKATEKNLQIGQDQPRVSTESLGTSFSSSSCSSTFTSLDHSKTLQCKPPPFDQSDFL
ESPTEIPIKRQSSSLHFSQQSTDLRDVVKDSMQREHRVISVKTAVREEGRGRALKHIDSP
RPCQQSKTVQPRVAEFNRPNHILAKLQESPWNCKEEKDTSLQRVWKEPPRFSYDERDTRD
TLKSTTKLKELPRLSLDSRQSSLRSSASESRLNFLLRELQRKNGTASQISNANQEPGSNK
RQSNVVVRLMGLEAFPDSISNDEGEPIKVTSCNDREFLTKSSEKSEKYKKIPVLFQQIAH
KDPASPASNNANLGVKSTSTPWFPLETAPWRQHDAINESPRTAPGSWNSCRNTPHTSSSV
YGEIEKRISELEFRKSGKDLRALKQILEAIQNTRKRLDNQEGEQTDMKSKTSRYISDYSC
CEDQASKASKWESNKSDYLASMKVSSSPKRFHSSTLVTKPATVMDNHRISSASVVPVDAS
HFPKLQTRDSLCTRKDSVVKPVAKDITPRKSTDQNPNHCKTFTDKKINGKILKVVQTTRA
PQQAKVENYSAFGRSSGTVSPRFQQKNRGIEKQTHLTTPSPDLGKRRSKLTEPDSMNHKI
RAKSTLHRRKDKISSTSDSKDFSHQGDTASIQSESNSSLASLTETEVTSTESSTEIKARQ
QADHKERKGAARLDEDMPLAELTIVPSEQPSPVSVLDATFYREDSPSPVKKISTLFQDYG
VPNPDETEWHYLGDGFNQKKLENLKHLVHKIRLLNAVPDEARMFEFPSVSKRDSPDHKYI
TKMLFASGLLQNIGPVPTAIHLHSSSHFLNPDLFHVLEQTEKNTKSANKERKQSTAPLKF
DQKIHRKIVFDTVNEILVRKLASDSPFTHRKRARTGQELLRELCSEVDRLQAKTDGSLDD
ADGFISILKADMNQQPDGWANYQSEVPAVVLDIERLIFKDLITEVITAEAVGQSDWTKKH
G*

>g52679.t1
MALRKGGFFCLLILFFFALNSWEVVKVEGTPNYRDALAKSILFFQGQRSGRLPHGQQLAW
RSTSGLSDGSFARVDLTGGYYDAGDNVKFNFPMAFTTTMLSWSTLEYGRKMGPELQSARA
AIRWATDYLLKCALATPGKLYVGVGDPNTDHRCWERPEDMDTVRSVYSVSPSNPGSDVAG
ETAAALAAASIVFRRADPVYSRLLLRTAQKVMQFAIQYRGSYSDSLGSAVCPFYCSYSGY
KDELLWGAAWLLRATNNVYYFNFIKSLGANDATDIFSWDNKYAGARVLLSRRSLLNRDMA
FEPFRQQAEDFVCRILPNSPYSSTQYTPGGLMFKLSQSNLQYVSSITFLLTTYSKYMAAT
KHTFNCGNILVTSNTLRSLSKRQVDYILGENPLKMSYMVGYGSNYPRRIHHRGSSLPSLA
IHPQSFGCEAGFQPFYYTANPNPNILIGAIVGGPNQNDFFPDERTDYSHSEPATYINAAI
VGPLAYFAGSFNM*

>g12566.t1.8.5bbdf940
MHHCLSSSTGWPCPSVDATVGLPSVFFFFVLSLPDFSVITSRTIFSVITQGYLRSFFRCF
CALPFLYLFLFPP*

>g9715.t1.1.5bbdf940
MFCDLYVGTSAEKLRGKVQVSHPSRRGLFGSFHFRATQHDLVNPPVTTYPATPVTNPVTT
PSIVPPDNSAPTVVTVPATNPIGVTQNPVATPATVSPATPVPVPDMNPVTPIVPVTNPVT
TPVTNPVTTPTPAGVLPVPSPVTNPTPAPVTTSAPAIPGQSWCVAKIGTSETALQAALDY
ACGMGGADCSSIQQGGICYNPNTLQSHASVAFNSYYQKNPTQTSCDFGGTAMITNANPST
GSCVFATLSSSSSPATATPTTAATSGATPSNSGTPPTGLNASNPTSGGTSSSFSNSPPTS
TTSTTSFSDGPPTSTTSTSISNRLRPAIGCILLVITFTFTRITVF*

>g24019.t1
MRLQIHGPSMCACCESNAEIESLEHVFSSGKLANEVWCYFEKGLGILSPDMRIIERCKRW
WLLDVHGVALKWITQVSPCLILWHLWRARNRARFEGKFWNAHQVCYMILQEIKLLCQLRF
HLSHDLGISWSSMLNFLGVRRMRFFAKPIYWEFPLSGFVKLNTDGSSFIESGIGGAGGVG
RDECGNFLFGFSCGLVNVNSLQAEARAVLNGLKIYQSLGITKVVIEVDSATLYGVLKETF
TIPACIRPIVRAIKLFLPENVIFQHCFREANFVADYLASIGVKNRCFQIYRNSLDLPKHA
SGLLRLDSLGICNFRFMKPTRKELHI*

>g58359.t2.1.5bbdf93e
MVSSVQGDAHSHSNESNLRGIHPPPTFGSSSNLEALGLQANATHDSDQETDVHSIFRTSR
PMHEITFSTVDKPKLLSQLTSLLSEIGLNIEEAHAFSTTDGFSLDVFVVAGWPYEEMELL
RSKLQKEITLAKQPSSEQHTSLAIIGNEQKGSTSISEYVKIPTDEIDVWEIDARQLKFGN
RIASGAFGDLYKGMYCSQEVAIKVLKPERVNIDMLKEFSQEVFIMRKIRHKNVVQFLGAC
TRPPNLCIVTEFMFKGSVHDFLHKQKGIFKLSIILKVAVDVCKGMNYLHQNNIIHRDLKT
ANLLMDEHDVVKVADFGVARVVSQTGVMTAETGTYRWMAPEVIEHKPYDHKADVFSFGIV
IWELLTGEIPYSDLTPLQAAIGVVQQGLRPAIPKHTHPKLVELLEKCWQQDPTQRPNFSE
ILEILQRIAKEVGDDGEDRHKDKSIGGFFSSLRRGHH*

>g41651.t1
MDVGGKTEMDLDGERYSRCLSSYVDQGSIESHRYYLSRRTVLEMLRDRGYLVPNSEIELS
LQDFRNNYGQQPDIDRLRISALHKDDPSNKILVLYCGPDVVKLKVIQAIESQIMNKDALS
RLILIVQNQITSQAMKAMDLFSFKVEIFQITDLLVNITKHVLKPKHQLLTEEEKQRLLEK
YKIEEKQVGVVTEQNIEFACGFTSPGAEHVFLQHAKAASFS*

>g37026.t1
MATLGDIGMSAAINILSAFAFLLAFALLRIQPINDRVYFPKWYISGKRSSFRHAADGNFV
GKFVNLNFKTYLTFLNWMPQALKMNEEEIIAHAGLDSAVFLRIYLLG*

>g2285.t1.1.5bbdf93f
MESGRLFFDPSCHGNMLFLRSGDSVFRGARSMLNMVETSRRQPFFSSPEELFDEEYYDEQ
LPEKKRRLTPDQVHLLEKSFEAENKLEPERKTQLAGKLGLQPRQVAVWFQNRRARWKTKQ
LERDYDQLKSSYDSLLSDCNSIVKENEKLKEEKLQAKGVPGKLVSSEESDPLPMDKLHAS
APKFYVKVEDRLSTGSGGSAVVDEDGPQLVDSGDSLLPDDDYPTGCVAPAADGVQSEEDD
GSDNGQNYFSSLFVAAGQLNHDEGEPMGWWVWS*

>g3642.t1
MIVAALVATIAFTAMITVPGGSDSDTGIPILSKKRLFIAFTISNALSLVSSTISLLMSLA
VQSTRWREEDFLDSIPQNLRDGLIFLLIAIASMMISFAAAIGLTLQKRIFDWAYIPITVV
ACCPMVILYEV*

>g19541.t1
MSCNGCRVLRKGCSEDCSLRPCLQWIKSPEAQGNATVFLAKFYGRAGLGNLINAGPDHLR
PEIFRSLLFEACGRIINPIYGSVGLMWSGNWQRCQAAVEAVLEGSPIMQVSSDDAAAEGH
PIMPLRSCDIRHLSKRSNGIHRVRTRNRFKRSGSSGKSQVDSVPELLMNEESKFCITGWD
FGKDDCGDELKRAPSHDSLSVETVEPTLVNRAEQGRVVKSETLVAPEDADLVLELTLGLN
PVHRSHRCPVVDLVSDSDL*

>g58607.t1.1.5bbdf93f
MEFLARSWSLSAMELSKALNHTDNAINHDEKSSLSSLADSKAQIGCPIISSKPAQTQPLS
TSDSPPVSPRGSDDTKDLFLLHQALNPDIINNQQQLKNGLHRNTVRGKTMGRWIKDQRER
KKQELRTHNAQLHAAVSVAGVAAAVAALATSSVTSPENSSTKQKKSSRASAAIASAAALV
ASHCIEIAEDMGADQDQILSVVNSAINVRTNGDIMTLTAGAATALRGAATLRARLQKSYV
GATIALAEELDENDKESNVLSATDFVSRGGELLKRTRKGDLHWKLVSININSSCQVVAKM
KSKHIAGTFTKKKKCVISGVYADIPTWTGREREECNEQRAYFGIQTADRIVEFECRNKGE
KLMWVDGIQHMLHFRVNMS*

>g76430.t1
MDGRGGCCIARYAGNMYDMSKIDRIMLRYRPIAPKPDTKNPGSRTAVADDSIAPMKTGRG
KRRYVRNTSGKMADGVSSGGVTKRCRCKNGGMKRKPSSSEENESNGRSTVSTGSVSGGDG
IVTLPLLPETPETNPPSSQEYPARGTFLTSHGVEKGPLWLNFGSGGSRGQDERGEMVARQ
PARVVGTWVRVECITDTWGFGADVHGVLGGCTDMERLMDLERDTCPGFISDGGNKVIWVN
KAYRQMVVGQEEEEVMVWLVLKEGLQLPPEKWPAFTCRVKVVTCLKGKSSVTIPCDVWRL
DGGQGFAWRLDTKAALSLGR*

>g36565.t1
MYQEARVKAQRMSGEAISTSEESEEGTEESSSEEEISSPFGLEASYNDLLVTHSKNLVAT
GGGVKKRKRRPLLGLQELKSNQITAWLNINLSYYTGNNCLGNPYLGIFYSGAPCFFFSTS
TSPSSSSSIRLHG*

>g4676.t1
MAYHHYRSPFGDTTYTKVFVGGLAWETPTDVMRRYFEQFGEILEAVIITDKNTGKSKGYG
FVTFRDPESARRACVDPNPMIDGRRANCNIASLGRPRPSPPRGRTAIQGGNPYHGGGGVM
AQGASSSYSGVPTPTPLPPPPAPPYVYPPYGYATYPPEYGYQQTIYNPQLQQAQYYQQLY
GPSSSGMGSPYFYGYSMQASRGTFSATPAQRIQGPSYLYYPPQMEGSFSTYPPPPPLPLL
QPARHPFAPSTGSPTPQQTPTTTETEAGVVTSDSPNA*

>g9725.t1
MKIQLLSLAAIVILSFTAEKTRQLVGVESSSRTGKERFTFLNCFDMSYGTLACIIKELVK
LYLYYIRAVHVHKIRISATQEALEENLSRGQSFEEAIKSAQQVGNGMARQASLQAKHIMG
PTISSGWDLFETLYVGGSLAEGVVRSIGTFIGAYAGGLTGEGNLGWLGFLVGSQMGSWVG
GRIGLMVYDVGNGLQYLLRLISEGSSSHPIAKY*

>g22110.t1
MKDAEAQDEFYDAVSGDSSSEDDDNDNDNDQEEVNKVRKIKLKNVSWAIASLAIKRLSAL
DANKELNPNITPISLVPCQFYGSMQQGKDETDTNCWTSPSGTGFMIRGKTYLKDSTKVKG
GEPLLKLIAVDWFNVENCVDNIALHPKCLVQSEAGKKVPFILIINLQVPASPNYSLVLYY
AADRPVNKKSLLGKFMDGTDMFRDSRFKLIPSIVEGYWMVKRAVGTKACLLGKAVTCRYL
RQDNFLEIDVDIGSSSVARSVIGLVLGYVTSIVVDLAILIEAKEEAELPEYILGTVRLNR
IRLDSAVPLQG*

>g60804.t1
MQLSFDSRGNSIPTILLLLQRRLYAQGGLQAEGIFRINAENSQEEYVRDQVNRGTVPEGI
DVHCLAGLIKAWFRELPRGVLDPISPEQIMQCQTMEDCAALVRLLPPSEGALLDWAINLM
ADVVQMEHLNKMNSRNIAMVFAPNMTQMADPLTALMYAVQVMNFIKTLVEKTLRDREDFV
VEEASTSHREPYDENGRQSPELCMVDAPESIEEPEPLFIAEEPELEITCHQVDNISAEEY
LSSSTSPEQYSDESGSSGTPIGPFTVTNLREHLVSGPKTDIKENIQESRTDQSSDSTQMN
CTKKMEDACIVIRAIGVHNKSKGISNLSHINSLTERIEAWR*

>g64954.t1.2.5bbdf93d
MVMDGNLRGYYGATPGMKFNDEGVSVVPNPDMISNLRIDDKIVEQNYALRPSIRSELHPD
VLVPPSGGDSHEDYDFSDVVLKYISEMLMEEQMEEKVCMFQESAALQAAEKSFYEVLGEK
YPPQPDHQVPNSNLRTSSCDENYLGDYNSFTSSNGLWCPNWNSDTSEYDYTHVQPFSVDV
PSLSTSQSSYSSSSSSGTVTDGPVDSPDSTLRISDIFSDSQSAMQFKKGFEEASKFLPSG
NALLADFPENGLLRKGQSSQTMSVKVEKYESGHSSDEPRGKKNPFHEDLHLQEGRTNKQS
AVYTESAVRSDLFDKVLLCSGGKNESDIRKALQDGASKNTPQNTQLKGSVGGKSRSKKQG
SKRNVVDLRTLLTLCAQAVAADDRRTANEFLKQVRQHSSPTGDGMQRLATYFADGLEARM
AGSGTQIYKALITMPTAAVDVLKAYQLYLATCPFRKISNFFSNKTIWNAAEKASTLHIID
FGILYGFQWPCLIQRLSSRPGGAPRLRITGIDLPHPGFRPAERVEETGRRLANYAETFSV
PFEFNAIAQKWETVRIEDLKINEDEVLVVNCLYRFRNLLDETVVVNSPRNIVLNLIRKLK
PDVFILGIVNGAYNAPFFITRFREALFHYSSWFDMLEATIPREIYERTLIEKTIFGREAM
NVIACEAAERIERPETYKQWQVRNLRAGFKQLPLNDEIMRMARERVKSYNKDFVIDKDSE
WLLQGWKGRILYALSSWSPAD*

>g13335.t1
MLPAWWWKWLVEAMTGGGGGGGRGGQRRRKLNMRTEETTCPSSVRAPLSIEIADKSSNPE
ETAAPPLTPPQKNSSSLDFFTQARKALCLRGPFDADDISSRQTPSTSANGSATVASTTFL
PSALVQLLSKHSDSRKRHKRSHSGGEHKGRPEKSRGSNIWVETEEYFRDLTTEDMDNLYQ
VSSMGFSSGDKCFSIPALENVENVCNLCSDTGDVHIFNVENNGDCDGQVGMVDKDCAAKE
AGRGEDAEEDGMKKVNEPQLMDVDILDGENETCKAAAEEQEQEEEQEKENGEVKGGVGGA
KDEKGVKFGIPFNGVEWLLGSRSKIYLTSGRASKKRKVMGGDAGLEKVFVTHSVEGFSSL
CHYCSTGDTGDLLNRLIICSSCGVSVHQRCYGVQNDVDGTWLCSWCKQSKEGQSGERPCL
LCPKQGGALKPAQKTENQGALAEYAHLFCCQWIPEVYVENIRTMEPIMNIDGIKDTRRKL
VCYLCKVKCGACVPCSNGACRTSFHPLCAREASHRMEIWRRIGCDEVELRAFCLKHSEVE
NHTSSQCTGNMLVPDGSDSRNQVVIPSANKTHKIKVGRRNGDKIAVNIETDDLDVNAYNL
NNSVLHVDGFPDNRSNSKVQSEFVDFQQHVNNDGAGTGTTDDANASGPLNLNVIVGKLIS
QGKVDVKDLAEEFGISPDLLALVLRDNQTVPGFSGKVVTWLKHHGYVGSLQKSLKVKIKS
STSSMAEAHMGVPADTNVVTVAKTKMPNVVPVKCIPPRRRTKSDTRILRNEKVICTSREM
MVNDMIVDEDESGLPNGDGCPSKESSGGIEKNFDEALEFQDISATHPPEAEVEPSDAVAI
NEYQNGLSKADTVIAANSDNRNAKSSVVSDHLPCPTKSESSYTHPLIQQMLIGMKNEFEC
EGSREREFSQLGASSSSGFCCNYPLAGPRDREFGASSSLGVCCNRHGQQAVSTDWMSKLN
VGNREQLVKARKLGLLDLFPSDEVEGELIFLQQRLLSSAIRRKHFIDDLISKVAKNLQQE
IDAARKQKWDAVLLGQYLYELREIKKQGRKERRHKEAQAVLAAATAAAAASSRISSLRKD
AIEESAHAEDLSKGNFSNGRPGFYLQQNPGVKETISRLSAARLSCEKNSDPFSLASNFSV
EHPRICEICGRCETILNPIVVCSSCKVAIHLDCYRGVKNSTGPWYCELCEDLLSSRSSGV
PTMSAGEKLYFVAECGLCGGTAGAFRKSIDGQWIHAFCAEWVLESTFKRGQVNLIEGTDT
VSKGGDVCVICNRKQGVCIKCSYGNCQSTFHASCARSAGFYMKIKTFGGKLQHKAYCAKH
SLEEKAKADTQKYGIEEFKSLKQVRVELERLRLLCERIIKREKLKRELVICSQDILASRR
DTAVLSALTRPPLYHPDVSSESATTSTRGYTDGNKSGSDTVQRSDDITVDSAVAGKRRIK
FQLSIDSNQKTDDGSVSQHIVTHKPVERVSFSGKQVPHRPAVASKNLSEDADKRSRYRKH
PETFEKELVMTSDQASMKNQRLPKGFVYVPIRCLSKEKETLPDACAQEPLEHDV*

>g28496.t1.5.5bbdf93d
MEAMAMEVGSSEHGLLLKRNQSLYTSLDSCFEIEKEMYRGQQYSQIYFARLHLFRTLIYS
LLPNWKPHLPVCTVLGLEKGKECVIVGTLYKHMKLKPSILEEYSKERSVIPLVRPHNFMD
LDDYLVLEDESGRVKLRGDVLLPSVYVTGIVVALHGKETDAGDFWVEDILEAGLPHQVER
PIKLGEDKYVVLVSGLGVGSSSSNPLQFQLLVDHITGHLGDEKEQSIAAKIVQVVIAGNS
VEIPRGLLNGQNLGSRDQSRLSEPIKELDILLTQIAAGVPVDIMPGPNDPANFSLPQQPL
HRCLFPGSSAYNTFRSCHNPHSFKLDDVSLLGTSGQNIDDLEKYSDAKDKLDFMERTLKW
RHLAPTAPNTLGCYPFTDKDPFIIETCPHVYFIGNQEKYETRLIKGEEGQIVRLICIPRF
NETGVAVALNIRNLECYTLSFGTQFG*

>g45199.t1.1.5bbdf93a
MAGRYESNPFGDEEVNPFANPGNVPPVNSKLSPLPQEPAATVDIPLDSSKDLKKMEKELQ
AKEAELMKREQELKRREEAVARAGVVIEEKNWPPFFPIIHHDIANEIPIHLQKMLYVAFT
TFLGLIACLLWNIVAVTLAWIKGEGPTIWFLAIIYFISGVPGAYVLWYRPLYRAMRMDSA
LKFGWFFLCYVFHIGFCVVAAVAPPIFFKGKSLTGILPAIEVLSSNALVGIFYLIGFAFF
AIESLVSIWVIQQVYTYFRGSGKAAEMKREATRSTMMAAL*

>g76163.t1
MENPKSEDCFAEGDCDSYDAVVIGSGYGGSVAACRMSMAGLKVCLLEKGRRWEAQDFPTN
SLEMLSAVRIEHRTLGVSIGPKDALYQVSYSVFSSLVSASSFTSGSS*

>g59473.t1
MAFAHYIIAAAPVETSHPNLRNSILTPPPLPSISNSRLSTAFSSFRHNLEVPKLSFFSKL
RKIGQKVKVKAVEAEVPAVDSFSQFKHLLLPVTDRNPYLSEGTRQAAATTASLAKKYGAE
ITVVVIDEKEKESYPEHETQLSSIRWHLSEGGFQEFKLLERLGEGKKPTAIIGEVADDMN
LDLVVMSMEAIHSKHVDANLLAEFIPCPVLLLPL*

>g36304.t1.2.5bbdf93d
MSEEEEPKKIIIDTDPGIDDAMAIFVALQSPEVEVIGLTTIYGNVYTTLATRNALHLLEI
AGRTDIPVAEGSHVTITKGTKLRIADFVHGTDGLGNQNFPPPKGKPIEQSATDFLIQQAS
CYPGKVTVVALGPLTNIALAIQSDPEFVKNIGQIVILGGAFSVNGNVNPAAEANIFGDPD
AADIVFTSGADVLAVGINVTHQVVLTDADRDKLALSNGKFAQYLCKILDVYYAYHHDAYK
TKGLVGAREMLGSCSFSLYN*

>g51095.t1
MDFWAARVHSAKHFSAVQAARLNNYDSHLTMDVEGEDDMRAWFPCPFCNVEIEVQVLCSH
LQEEHCFDLKNAVCPICAATLGKDAIGHFTMQHAHSVKRRRKSQKSGVWSNASAVACKDL
QELASFGSNSLNCRSDRQEPAPDPLLSPFVCSTPFSNSKDYKKDASSNYADSTANADSSK
PSLSDAIQEEDYKEMMQKAAFFQEVIMSTIF*

>g4077.t1
MVPVLIMAESSANVEDNYWLLRAEEAWNHTLRAYKPNPEEITSAFNKHANSALNEFLSEK
NSTRRELRGNKKWGGGCLATNPIDRCWRCQPNWADNRKRLAACAIGFGRGTIGGKNGAFY
VVTDPSDNDILNPKPGTLRHAVIQKEPLWIIFQHDMVIKLSQELIMQGDKTIDARGANVH
IAYGAGITIQFVKNVIIHGLHIHDIHPASGGLIRDSVEHFGIRTMSDGDGISIFGSSNVW
IDHVSMWNCYDGLIDAVEASTAITISNGHFTDHNEVMLFGASDSQSKDAVMQITVAFNHF
GKRLVQRMPRCRWGYIHVVNNDYTHWEMYAIGGSQHPTIISQGNRFIAPPDIFKKEVTKR
DYATEATWKQWTWRSEGDLFMNGAFFVQSGDPDFTKKHHELYDGITPADSSQVTWITRFA
GVIDCKIGRPC*

>g67250.t1.1.5bbdf93f
MEERDREKGKGSSERWTAATTNLSELAANLDSLQKLLTKKAVYVDEETFAKASLSSQQAR
TIKVLEQRVETLERELDAAISAAARARNEKRQAEAAQKAAELRALEVTRELENTTIFELH
MEELRAKQEEISKRDHEIKLLEAIIQTLGGRKSRSSND*

>g49504.t1
MSSAVEKTGEMNGMEDQEDDEEELSWSSDSEIGEALDYLDSKDDSEVMDGVLSIHTRRPN
AHGGLHSRPNTLSLQPLSNRNQKYASHIKASPLEEWEGRLNVGMSNSVTTAIRESVRDMA
IGKTKTTEKADRATVEQAIDPRTRMVLFKMLNRGVFNDINGCISTGKEANVYHATKADAQ
ELAIKIYKTSVLVFKDRDRYVQGDYRFRYGYCKHNPRKMVKTWAEKEMRNLMRLKAAGIR
CPTPLLLRLHVLVMEFIGKSGWAAPRLKDAALSLDKLRECYVEIIMSMRTLYQKCKLVHG
DLSEYNILYFEGHLYIIDVSQAVDLDHPHALDFLREDCVHVSDFFKKHGVAVMTIRELFD
FIVDPSIDDDSVDSYLEEVQQKILARGNVISAEEEIADSVFMQSYIPKTLDDVKNAEEDV
QRLTRGTDTGDMYYQTITGLKQALSISDSSLTERQLHKQVQQTAEDYPFPGKCPGLANSG
SITGTDEDESDSTDREEEDSSSEDEQPTVIDRKAARKENKKKVKEEKREARKHKVPKAVK
KKKKKLAKAKKYR*

>g26492.t1
MRVDKPLEELYNVRVERKVSKERLAELGVSKWSVWKTGKCKLPWDWHVDQVVYIEEGEVR
VVPEGSERFMQFMAGDLVRYPKWFEADLFFNDFYQERYKFRAYGDD*

>g4818.t1.4.5bbdf937
MESKQSEISTPSNGKTSDIPMASAVEFIPDNSANNAPSKVSVSGISNWAKNLKIPQSLVG
SPNESPTENSGKSSFSRFTGGIGLRLSPRASQQEEKSDGTSTAAESGFIGTITKGIVDSS
KSAVKAVQVKARHVVSQNKRRYQEGGFDLDMTYITENIIAMGFPAGDMSSGFFGYVEGFY
RNHMEEVIRFFETHHKDKYKVYNLCSERLYDASLFEGKLASFPFDDHNCPPIQLVISFCQ
SAYLWLKEDIENVVVVHCKAGMARTGLMISSLLLYLKFFPTAEESIDYYNQKRCFDGKAL
VLPSQIRYVKYFERTLTYFNGENQPGRRCMLRGFRLHRCPYWIRPSITVSNHNA*

>g37804.t1
MGICLSQQIKAESPFSSGTELNSKNESEEGTQMSYLSSKVSSLSTCQSYRSEDEILQSSN
LKSFTFGELKSVTRNFRSDSVLGEGGFGSVFKGWIDEQSLTASKPGNGIVVAVKRLNQDG
LQGHKEWLAEINYLGQLRHPNLVRLIGYCLEDDHRLLVYEFMPKGSMENHLFRRSYFQPL
SWSLRMKIALDAARGLAFLHNAETKVIYRDFKTSNILLDSNYNAKLSDFGLARDGPTDDK
SHVSTRVMGTYGYAAPEYLSTGHLTAKSDVYSFGVVLLEMLSGKKAIDKNRPTGEHNLVE
WAKPYLTNKRRIFRILDARLEGQYSMSRALKVANLAIQCLSVDPKLRPTMDEVVTTLEQL
QDSKVTSNHDQKDSQLNQHRHPSSGHRSRRRSAEAASKKTAYPRPSASPLYA*

>g34510.t1
MISRNILFVCCLLCLLNFYQRHITVDAQNYWCTNNPYNPNTTTGSVYRTNLNLVLSILSS
NASLEANKGFYNFSAGSGPNTVYGLFLCRGDVTPDVCAQCVADAGDQILKLCADQKIAIT
WLDKCLLRYKNESMSSIVEQSVKIYIWNTQNATDPNQFNQRLGDMMDKIAIQAANGNSGM
KFAVQEANYTPFQKIFALGQCTPDLSSDQCENCLRNCIGDIPRCCSNRQGGIVLTASCII
RFELYRFYNPVTPAPEAAPNVPSPPPPPTPATASTKGSLQYNLSEIQAATNNFAMGNKIG
EGGFGPVYKGTLPNGQEIAVKRLSRRSAQGVEEFKNEIELVARLQHRNLVRLLGFCLEGE
EKILIYEFVPNKSLDYFLFNLEKQHLLDWSRRYKIIGGIARGLLYLHEDSRLKIVHRDLK
ASNVLLDRIMNAKIADFGMARIFGVDQSEGNTSRIAGTFGYMAPEYAMHGLFSVKSDVFS
LGVLVLEIVSGKKNSSFYQEHGADDLLSYAWRQWRDGTPLSLLDPSLGDSYARNEVIQSI
HIGLLCVQDDAEQRPTMASVVLMLNSYSVTLPSPNPPAFYGRTGTESLPRQLPDSDKSTS
TKSVLGPSINEVSITKLYPR*

>g14173.t1
MTGVNQQQFMAAMILLGLLLLSAFDFTEGQAGVCYGRLGRALPSPADAIALCNRNNIKRV
RIYDPDQSTLQALGGSGIEVILGVPNDKLRDVSASPDAANGWVQDNVKNYPNVNFRYIAV
GNEVSPLRSDTSQYTTVLLPALQNIFNAISAAGLGKIRVSTAVETGLIENGYPPSAGNFR
SDVQSFINPIVQFLAGNGAPLLVNLYPYFAYTGNSQISLEYALFTSDGIVTPDGRYQNLF
DALLDAMYSALEKAGGSSIEIVVSESGWPSDGGPATSIDNAMTYNTNLLKHVNGNSGTPK
RPGKSIETYVFALFDEDQKNPEYEKHWGIFLADGRPKYQISF*

>g29173.t1
MASTDTADHITNEHEMVRQLADFPENIWADRFASFTFDKQGHEMCAEEVEQLKEEVRRML
LSTENDIMEKLDLIDKVERLGISYHFENEIEQQLQKFFDSSANFEADPKFDLYFAALHFR
LLRQHGFNISCGIFYEFMGANDKFKESLKSDTRGLLSLFEATHVRTQKDNILEEALTFAV
THLTCGAPHMDPVLAKQVEYALELPLHKSILRYEARRYISIYEEDDSNNKVLLRLAKLDY
NLLQMLHQQELAEILRWGKELDIASQIRYARERYMECYFWAVGVFFEPQYSLARIHFAKI
TQLVGIIDDTYDAYGTLEELKIFTEALERWDGSGIDQLPENMKTSFMALLNFNKELDKVF
ANDGRTYAFDKYIEEVWPRC*

>g18678.t1
MAPAPAPVPAPFAIFMIATTFLIIHASSAVKEGATLQIPFSYMGATGPDKWGSLNPAFSE
CSKGKSQSPIDIPKRKVVLDKNLKPLTRQYSYINATLVNNGFNVGLRCGENSDLLISDGK
TYKFKQMHWHSPSEHRIDGVRYALYLAHLKCTSTILDEFIYTRKIKGGKILHVGMLITLE
FPWLKTQSDHKNREA*

>g69610.t1
MTSACKKPAAVAYPKTPLSIAVSLGCLAIFLILTSSSLISQRFGSRVRDYVYVVDHSPEV
SLIGTAPDETVVNFGYRTDISDNILGSSKGAGDDFQESGGGFGDSKIAESISQHNKLMAL
GEGNGKGNELVKYFQPYVSGDKNELVDPRQQQQVAKDLTEPPAGFGLSDAMAQPMHSHIA
QREEGIKNSSFSTGGHTVQTALSLSSNPSEDSNLQVDLKNATQLPSPDYSSKDTIHSPPT
FTNTSQGSSVDSGCDLYHGKWIYDSGGPLYKNDSCPVLTQTQNCQGNGRPDKEYENWRWK
PTQCDLPRFDARKFLDLMKGKTIAFIGDSIARNQMESMLCLLWQVEVPKNRGNRRMQRYY
FPSTSTMIVRIWSAWLVSQTSEQFDFAPDGVAKVHLESPDESFMNYITDFDIIVLSSGHW
FKKQSVYILQNEIVGGQLWWPDKSRKMKIDNIEAFGISVETILTAMVKHPNYTGLTIVRT
FSPDHYEAGQWNTGGSCTGKVRPLKDGEVVENEFTNIIHQKQITGFSRAIKKQTNKSKLK
LMDVTEAFAYRPDGHPGPYRSTDPNKITTRGPDGRPPPQDCLHWCMPGPVDTWNEILFEI
IKKEL*

>g66064.t1
MGRAPCCDKTNVKRGPWSPEEDAKLKGYIEQYGTGGNWIALPQKIGLRRCGKSCRLRWLN
YLRPNIKHGGFSEEEDNIICSLYISIGSRWSIIAAQLPGRTDNDIKNYWNTKLKKKLLGK
QRKVQRVRSATSLKQEIMRRKESFVTTAAIHVHPHQLQQSQDLPAVIPQQDVEDQAVNIG
GKLSADDHQINGNSFNNHNSIYSCDIPIAEGQACENFFSMPSCSQQCLPSYYYPIFGVNE
NSNIPYYSSFPVHELDGVEYNNRHHLDSFSGMAMVNRSTITSTSPENTSWGDINSLVYSP
MVSNYEICQQAVQQDCTLEDSSYFRMQQEVVLQ*

>g4997.t1.1.5bbdf93f
MKLLSNILLNQTAEPFFVMAGPNVIESEQHILYMAKHIKAITSRLGLPLVFKSSFDKANR
TSSKSFRGPGLAQGLKILEKVKIEYDIPIITDVHETIQCEAVGRVADIIQIPAFLCRQTD
LLVAAAQTGKIINIKKGQFCAPSVMVNSAEKVRLAGNPNVMVCERGTMFGYNDLIVDPRN
LEWMREANCPVVADITHSLQQPAGKKLEGGGVASGGLRELIPCIARTAVAVGVNGIFMEV
HNDPLSAPVDGPTQWPLRHFEELIEELVSIAKVSKGKQQFRIDLTPFQD*

>g15056.t1.2.5bbdf934
MILTPNLLLKKMISRWCKDFGIELPRSLQDVDEEKITANADLGRLSSQLEKLSSSTLFDQ
KMAAKEIRQITRRSPSFRALFGEVTDSVSCLVRPLLSGQADIDPELQEDLITTILNLSIL
DSNKKLVAENPAVIPLLVEALKSASIETRSNAAAALFTLSAHDSNKHMIGKLGALKPLIE
LLEEGHPPAMKDAASAIFSLCIVLENKSRAVSDGAVRVIMKKIMDHLLMDELLAILAMLA
SHHKAIEEMAELGALSFLLDIIRENTSDRSKENCIAILYTMCFNDQAKLREIRKEEDAYG
TISQLAQNGTSRAKRKANGILERLKRNDVVSTA*

>g29553.t1
MASLASSSTSSSIFLVLILFSTLICEPSLAALVKQQPLVLKYHNGVLLKGKITVNLIWYG
KFTPIQRSIIVDFFQSLNSPGAAVSPSAASWWQTTEKYKGGGPSTLVVGKQILDENYSLG
KSLKNSNLVYLAAKGGHLGGPINVVLTSKDVYVDGFCSRCGTHGSTRGPARFAYAWVGNS
ETQCPGQCAWPFHQPIYGPQTPPLIAPNGDVGVDGMIINLATVLAGAVTNPFNNGYFQGP
ATAPLEAVSACTGMFGSGSYPGYPGNLLLDKATGASYNAHGVQGRKFLLPAIWDPQSSAC
STLV*

>g51053.t1
MVFTIYSLVPFIFFIAYIIKWFYSSSTTQKKQLPSPVKLPIIGNLHQLGLLPHRSLQSLS
KRYGPLMLLHFGSKPVLVASSADAASEIMKTHDLVFANRPKSNIRRRISYGFKDVAFAPY
GESWRQMRSICVLHLLSNKRVQSFRSCREEETSLMIGNIGQKCVSSSSSLINFSDIFATL
THDVLCRVAFGRKYSGEENGRKVKTTLVEFVQLLGVFDVGDYIPWLAWINRFNGLDAQVQ
RVFKNVDEFIEGIIEEHRNKANIDENTNEPRDLVDILLEIQKEKLAGFAIEPDAVKAVIM
DMFGGGTDTTQTSMEWTMAELLRHPKILNKLQTEVRQIAQGKSGIAEDDLDKMHYLKAVI
KEVLRLHPPGPLAVPRESTRNVRVMGCDISAGTQVIVNVWAIGRDPKVWNNPEEFQPERF
LNSYMDFRGFNFELIPFGSGRRGCPGISFATVVNELALAKLMHKFDFALPDGTMPEDLDM
SEVNGIVVHKKIPLHAVATLHAD*

>g51957.t1.5.5bbdf93c
MWVNCINCRQCPTRGYRGLELTPYNPKDSLTGKLVTCDREFCQEIMRGSASGCTANETCL
YTEVYGDGSFSMGYFVEDFVQYDRVSGDLQTESANGSVIFGCGAGPSADIGSTDDALDGV
LGFGKANSSMISQLASSGRVKNMFAHCLDGVNGGGIFAIGHVVQPKVNMTALIPNQSHYN
VNMTAIDIGNTTLSLPTGVFMLGDETGAIIDSGTTLAYFPEAIYQPLVLKILSWQPDLKL
LTVHDDYTCFDYSESVDDGFPPITFHFGNLLQLKVYPHDYLFPYEGLMCVGWQNSGVLSG
DKKNITLLGGTECQEK*

>g1131.t1.1.5bbdf93a
MNLAPAISTTISSAVTLRLLSSSSSFSSKTLHPFYSWIRHNSTIPNLTSKNPMFSNNHNI
NLSPSSISAAAAFSATPSAPESQPDKSKPQPWLIVGLGNPGKRYNGTRHNVGFEMVDYIA
EAEGISMSSVSFRALFGKGHIANVPVMLAKPQTFMNASGESVGAIASYYKIPLKHVLVIF
DDMDLPFAKLRLLPKGGHGGHNGYIACCHIRFYVASR*

>g65864.t1
MMGENSSPKGYLKNPVVLENSSPKGYLKNRVVLGDVTNQLGKRGISSTSGEEICGKADRK
QREMDRGKRACVSPRSCSQISSLKGNVIMGISRIPSENKDPKLLDNGVDSSVIHAILQGS
DDSGGTHEDDVEVICDNEKGRFGSGGFQDYDTDTHVLENDGDDHGFDNLVLSQTASVDYI
RLPESQESRNFELERCSGLKTHGCLSSTTDIDLIKACSCSFCTKAAYILLDLQYQDVKGR
IAALKKSKKDASILVETSCRNKGTNKHCAGSSSEQPNLEHDLMTQWRSLFLHMEGIFANE
SKGLETSLASLKDLRDKYKTELEVINSTAPENH*

>g5154.t1
MANLSSLVHELRERIAASSSTPPNKQNDEALEARFRAVLPNLLHAYVVPSPSAKEREVMA
VLKLLTHTAKNFPGVFYHGKAAAVLPIIGRILPFFAEPAFRSRHGVFFETIGSLLSLLRT
GDRDAYRNFFMDSMLLVEDLLYICSVCSKACSTEPQKVSLKCFHMSFAGACGEDALLSDV
PASSKPADGYGIQIDLTGKVRWQPFATSAIKLLCKCLTEGTLHVEGLIHSPCVWAACSLI
CYGDADLHIACFDFVRLIGAIIDCDILPAEKLIQSILLILGENEDGVSTFRYPDLV*

>g41744.t2
MKVDEAMHLFREIPLKGLKPDITTYTPVVQGLFKVGQCATAKRVSNEMQAAALKPDFHTY
CVMLEGLSRNGRINEALLFLQKMESDGIELHIAMFNIMIDASCKFGKLDVVQSIFRSLAD
KGLHPDVATYNVLIKGLCGAGKLKEAKEILMKMKEDSCLPNDRTYNTIVLGFLKAGEYVE
AKVHLEEMIAKGFSPDSFTCSMLLLVLTEDNNPNLLDTVLKFPSEPHGYLREGRCVSQGY
IFKKRLQKVYFCCLRVPEVLIYSEWHVWLNWKLEIKIQNWEIHQVVSQSSLEVLSVMSTI
LYHSVECLFCNGIILLYHIVIEMHLIADANSPSEKSVVVTRWLVTQVLHFERNGHSIIPA
EV*

>g59007.t1
MDAKTKAVKSTGEISMMENKKTSGEMVVVISGDENDPKNPHPAASPLRKSVDSPAGAQTS
MPVSFSSPEAVRYSPSPNKPPKIPTTDTLTRRKSLARSVFSKPKSRFGEQSVPVDNNILD
ESSSTIQEQAEPSSNATSLKETIRNVPITPRTPLMASPGGFRGVDESEEIYKKVSIRNRL
RYNRVKVKVLIEWFVFACMLGCFIASLTVHKLRHWMLWRLEIWKWGALVMVTFSGMLFTK
WLVLFAVLLIELNFLLRKKVLYFVHALKKTVQVCLWLSLVLLTWVLLFRKGVERSRLAAK
ILDYITWTIVTFLIGACLWLLKTLLLKILASTFHVNTFFDRIQESVFHQYILLTLSGPPV
MESTEMLGRTSSGVSQFSFRRTKIGKDGKEKKKESVIDINKLHQMKREKVSAWTMKMLVD
VISNSGLTTLSGTLDESFYDGGNEQADKEITNEEEAIAAAYHIFRNVAQHGHRFVDETDL
RRFMIKEEVDIVLPMIDVAETGHIDRKALTDWVVKVYNGRKALACALNDTKTAVKQLDKL
VTAILIIIIIIIWLLLMEIATTKVLLFLSSQLVVAAFMFGNTCKTIFEAIIFVFVMHPFD
VGDRCVVDGVQMIVEEMNILTTVFLRYDNEKIYYPNSVLATKPISNFYRSPDMGDSLEFS
IDFKTPLELIGTLKEKIKKYLENNPSYWHPNHSVVVKEIENVNKIKMALFFNHTINFQNY
GEKTSRRSELVLEMKRIFEELNIKYDLLPQEVHLVETKSVTTRTSR*

>g48320.t2
MLSLLVIGIHLEQEFGFGEGVKWLPTTASGVSITRLRDISAAVIEVEGNFQIKATVVPIT
EKESRIHNSGITEEDCFAHLDLRFKVYSLSGAVNGSDV*

>g9361.t1
MAQSVGRDDAEATEIEMSEKRRSPRSRGNSSFRSNSASSDIIDEETALKWAAIERLPTFQ
RLKSSLFDENIWNEADNKSKRVIDVTKIAPLEKHMFIEKLIKHIEQDNLRLLQKIRKRLD
KNGIELPTVEVRYHNLRVEAECEVVHGKPLPTLWNSFKSTLLDLATLPGIKSQKSKINII
SGVSGIIKPGRMTLLIGPPGCGKTSLLKALSGNLNKSLKIAGDISYNGFKLTEFVPQKTA
AYISQYDMHIPEMTVRETLDFSSCCQGIGNRAEIMTELSRREKDAGILPDPDIDTYMKAI
SVEGQKTTLQTDYILKILGLDICADTLVGDAMKRGISGGQKKRLTTGEMIVGPTRALFMD
EITNGLDSLTTYQIVSYLQQLAHITDATILISLLQPAPETFDLFDDVILMAGGKIVYHGP
RSNVLEFFESCGFRCPERKGVADFLQEVISKKDQERYWYRADETYVYKSVDMLSREFEES
RFGKMLNEELSKPFVRSKGHKDAITFSVYSIPKWALFRACISREFLLMKRNSSIYVFKSA
QVLIAAIITMTVFLRSRMNVDLEHANSYLGALFFGLIIIFLDAYPELALTVARLPVFYKQ
RDLHFYPAWAYAIPSAILKIPLSFLEAVVWTSFTYYVIGYSPEPERFFGQLVILFAVHLA
SISMFRFLASVFRTIVASTTAGALTILSVQLFSGFIIARSSMPVWLRWGFWISPLTYGEI
GVTANEFLAPRWQKMLLTNTTIGRETLESRGLSFQGSLLWISVAALFGFALLFNIGFTLA
LSFLNPPGSRAIVSREKVSKIQGGNESTDKNHATNSRKSPPSTSKESRKEKMVLPFEPLT
VVFQDLQYYIDIPLAMKERGFTQKKLQLLCDITGTFRPGVLTALMGVSGAGKTTLLDVLS
GRKTSGTVQGEIRIGGFPKVQQTFARISGYCEQFDIHSPQITVEESVIYSAWLRLDPQID
SKTKSDFVKEALEAIELDDIKDSLVGTPNVSGLSTEQRKRLTIAVELVANPSIIFMDEPT
TGLDARAAAIVMRVVKNVADTGRTIVCTIHQPSIDIFEAFDELILLKSGGHMIYCGQLGQ
HSNNVIQYFESISGVPKIKNNHNPATWMLEITSTSSEAELGVDFVQSYKNSTLFEDNKML
VKRLSSPSPTSKVLNFPTRFPLNGWGQFKACLWKQFWSYWRSPSYILTRFLLMLLASLIF
GSLFWDQGQKINNQQGVFNILGSMFVSVIFCGINNAFSVSPKISMERTVFYRERFAGMYA
SWPYALAQVAIEIPYVLTQTLVYTFITYPMIGYHWSGYKVFWYFYSMFCNLLYYTYLGML
TVSTTSNIPMAMIWQTTFNKLFNLFSGFLVPQPQIPKWWLWFYYLSPTSWALNGMLTSQF
GDIHKEIRVFGETKPISTFLRDYYGYHYNQLPLVAVVLTVYPIIIAALFALCIAKLNFQK
R*

>g7316.t1
MGRLVFAFLILSGIFVVQSMAARPELKVQKLVHLSLKMEKSIADPPAVNGADPSMASKEE
EGTEQTVAEAPEGAVRKISKHHSTDKSVAGGGVIIGGLVTAIFAAVFCYIRVTRRKSSSD
GEKH*

>g72935.t1
MALNLLSPTTEMKTISFLDSSKSNYNLNHLLKFQGGFSFKRGTVGKKVQCSAQPPPPAWP
GRAVAEPGRKSWDGPKPISIVGSTGSIGTQTLDIVAENPDKFRVVALAAGSNVTLLADQV
KTFKPQLVAVRNESLVDELEEALADFEYKPEIIPGEEGVVEVARHPDAVSVVTGIVGCAG
LKPTVAAIEAGKDIALANKETLIAGGPFVLPLAHKHKVKILPADSEHSAIFQCIQGLPEG
ALRRIILTASGGAFRDLPVEKLKEVKVADALKHPNWNMGKKITVDSATLFNKGLEVIEAH
YLFGAEYDNIEIVIHPQSIIHSMVETQDSSVLAQLGWPDMRLPILYTMSWPDRIYCSEIT
WPRLDLCKLGSLTFKTPDNVKYPSMDLAYAAGRAGGTMTGVLSAANEKAVEMFINEKIGY
LDIFKVVELTCNKHQAELVSSPSLEEIIHYDLWARDYAASLQPSAGLSPALV*

>g28970.t1
MAKSLEEQHPIKAFGWAARDVSGVLSPFSFSRRTTGEKDIQIKILYCGICHSDLHCVKNE
WGFSNYPIVPGHEIVGVVTEVGSNITKFKVGDKVGVGCMVGSCLSCENCSNNLENYCKKV
IPTYNSTYYDKTHTYGGYSDILVVNEHFVVRIPENMPLDAGAPLLCAGITTYSPLRYFGL
DKPGMHIGVVGLGGLGHVAVKFAKAFGVKVTVISTSLHKKKKALEHLGADSFLVSTDKDQ
MQAAMESMDGILDTVSAVHPLLPLINLLKSHGKFVMVGAPNRPLELPVFPMLAGRKILAG
SGIGGMKETQEMLDFAAEHNIVADVEVISMDYVNTAMERLARADVKHRFVIDIGNTLKTA
*

>g5476.t1
MNPRARYPPGIGAPGAGRGGGNVNPSANPNFQPRNPQQYLQRSPMQFQNQPPPQQHQQWL
RRNQLGSDSTVEEVEKTIQSEAVNSSSQDWKAKLMIPPADTRYKTEDVTATKGNEFEDYF
LKRELLMGIYEKGFERPSPIQEESIPIALTGSDILARAKNGTGKTAAFCVPALEKIDQDN
NVIQVVILVPTRELALQTSQVCKELGKHLKIQVMVTTGGTSLKDDIMRLYQPVHLLVGTP
GRILDLAKKGVCILKDCGMLIMDEADKLLSPEFQPSIEQLIRFLPANRQILMFSATFPVT
VKDFKDRYLKKPYVINLMDELTLKGITQYYAFVEERQKVHCLNTLFSKLQINQSIIFCNS
VNRVELLAKKITELGYSCFYIHAKMLQDHRNRVFHDFRNGACRNLVCTDLFTRGIDIQAV
NVVINFDFPKNSETYLHRVGRSGRFGHLGLAVNLITYEDRFNLYRIEQELGTEIKQIPPH
IDQAIYCRVNYQCFWHATSGHKSDVKVMSSVV*

>g10076.t1
MTTLTLALTATASGSSGRFFSAGRSNFHSSTTARTSLGKTKRESASFAPTIRCQSTKTNE
PKAKMNLLDNASNLLTNFLSGGRMGSMPIAEGAVSDLFGRPLFFALYDWFLEHGSVYKLA
FGPKAFVVVSDPIVARHILRENALSYDKGVLAEILEPIMGKGLIPADIETWKQRRRVIAP
GFHALYLEAMVEVFTDCSERTMLKFEKLLEGEERKGGKTIELDLEAEFSSLALDIIGIGV
FNYDFGSVTKESPVIKAVYGTLFEAEHRSTFYIPYWKFPLARWLVPRQQKFQKDLKFIND
CLDDLIRNAKETRQETDIEQLQKRDYSNLKDASLLRFLVDMRGADVDDRQLRDDLMTMLI
AGHETTAAVLTWAVFLLAQHPSKMKKAQAEIDSVLGQGRITFESIKKLDYYLYT*

>g13660.t1
MKSAQPCRLGIKDMQILPMPRQRAHLKKPTWIIVLVSLVSMFLVCAYVYPPHNSAACYVF
SSHGCKGISNWLPPAPARELTDDEIASRVVIGDILSMPRIVSQNPKIAFLFLTPGALPFE
RLWDKFFQGHEGKFSVYVHASKDKPVHFSRNFVNREIRSDKVVWGKISMVDAERRLLANA
LQDPDNYHFVLLSDSCIPLRNFDYVYNYLMYTNISFIDCFEDPGPHGSGRYSLHMLPEVE
KKDFRKGAQWFTMKREHAIIIMADGLYYSKFRDYCKPGMDGKNCYSDEHYLPTFFHMLDP
AGVANWSVTHVDWSEGKWHPKSYRAQDVTYELMKNITVWTLTCFAPFVYLHFFCFRFSFP
GKFWSICCRDSDPMRILVVQNFL*

>g46112.t2.8.5bbdf938
MMLGRLSSFTCSRVVLVVVVAVSLYCRCPQLFALAQRAHPSEVSALEAIASNLIDQKNYL
KDWRKGDPCIANWTGVLCFDALGADGYFHVRELLLMNMNLCGNLAPELGQLSQLQILNFM
WNELTGSIPKEIGHIASLRLLLLNGNKLSGSLPNELGYLSNLDRFQIDQNQLSGTIPKSF
SNLKSIKHIHFNNNSLSGQIPSELSNLSTIVHLLLDSNNLLGYLPSKFSTFPELRILQLD
NNDFSGAEIPSSYRNLSNLVKLSLRNCSLKGPIPDLSRMPNLKYLDLSRNQLSGTLPLNN
LSNNITTIILSDNQLSGSIPESFSYLPSLQRLSLENNFFSGSVTVDLWQNRSFSSAARLL
IDLQNNSLSNMIGALDPPVNVTLRLQGNPVCRNANIRNISLFCGPEAEIYDVPNTSTNST
DLCRIQACPIGNYFEYAAESPVPCFCASPIRIGYRLKSPSFSYFPPYEYPFESYLTNSLN
LSLYQVSIDSYSWERGRLKMYLKLFPVASADHSGTFNKSEILRIRGIFTSWEFRGNDLFG
PYELLNFTLLGPYSFVVISATVTVFITKSHERYQLASSRKHLSSKLCIKIEEVKSFTFGE
MASATNHFSSSTQVGQGGYGTVYRGTLADKTIVAIKRAKEGSLQGQREFLTEIELLSRLH
HRNLVSLLGYCDEEGEQMLVYEFMPNGTLRDWLSAKSGETLNFGARLCIALGAAKGILYL
HTEAHPPIFHRDIKASNILLDSKLTAKVADFGLSRLAPVLDDEGALPEHVSTIVKGTPGY
LDPEYFLTRKLTDKSDIYSLGVVFLEILTGKRPIMHGKNIVREVKLAHQSGTMFSIIDSR
MGSYPSECVERFVALGIRCCQDKPDERPSIIDVVRELENILRIMPETGVDSSESKSKYFS
ESLLSSSPSANTSNRYASSSNSGGYLISGVTLTVTPR*

>g50256.t1.1.5bbdf940
MNRNKKSAKPEKKSGQKRKSKAKNDDVKEKEATVLELSSSESEPEEENASEAGKIEDSDD
EEIRLLFEDKVAGRNVKNVGGKTMAKDGKRGGGRSSSGKEVEKSKSKGKMETVMEKEEEE
EEGESEDDRRWRKEEKKNKKKIAVEEEGKEESEKEEGSACKFPMYRIHRIMKDQNCSTKI
AQEAIFLANKALEKFLELYSREAYACTYLDHKNQVGYGHLASVVSKRKRFDFLSDCCFCI
*

>g44445.t1
MARSMSRGGGAGKFVVGEYVVGKQIGVGSFSTVWHGRHRVHGTEVAIKEIVTARLNSKLQ
DSLKSEIVILKKINHPNIIRLHDMIEDSGKIYIILEYCRGGDLSVYIQQRQGRIPEATAK
HFMQQLAAGLKVLRENNLIHRDLKPQNLLLSANDDKSILKIADFGFARSLQPRGLAETLC
GSPLYMAPEIMQLQKYDAKADLWSVGTILYQLVTGKTPYTGNNQIQLLQNIVKSTELQFP
RDIKDLSPHCIDLCQKLLRRNPVERLTFEEFFNHPFLSQRQADDLSRDMRPQKIIDGFSL
SELNSVENTEEISQEDLPFSLDDDSSGPDGSPSFVKRSPIRSTYGFSLDAKPDRKEASKE
AEKMNIASNYGSVTHKPEITVFNVGVKPLPEGNLKEPLKSMDHAPAKVADSLELIDQEYV
LVPGPPLDMSCSVDISNLSNVASKSDSPPQISGIINSTTTAPMPIIGTAASKVGRIESFE
SRSSAPGTSQGSTDIADTLEQPSADCMRRVRSLKRCASAIKELVNEKVFSNNLVKVKAIQ
GFLHFMLNLYWC*

>g32653.t1
MLPYQVVNKDGKPYINVKMKNDEMKLLSPEEVSAMVLQKMKQTAESYLGDEVKNAVVTVP
AYFNDAQRQATKDAGTIAGLNVVRIINEPTAAAIAYGLDKQEKERNILVFDLGGGTFDVS
ILALDGGVFEVLSTNGNTHLGGEDFDHRVMDYFVKLIKKKYNKDISNDKKALGKLRKECE
RAKRALSNQHQVRVEIESLFDGTDFSEALTRARFEELNMDLFKKTMEPVKQALKDAGLEK
TDIDEIVLVGGSTRIPKVQQLLKDFFDGKEPSKGINPDEAVAYGAAVQGAILGGHGGEET
KDVLVIDVTPLSLGLETVGGVMTKLIPRNSGIPMKKSQIFTTYQDQQTTVSIRVYQGERS
LTKDCHELGKFDLSGIPPAPRGVPQIEVTFEVDANGILQVTAMDKAAKKSNSITINNEKG
HLKQEEIDRMVKEAEEFADEDKEVRETIDSRNKLESYIYNMKSSIRDDDKLAGKIDSDDK
ENVETALKDALEWLDDNPNAEKLDYDEKMAELEAVFNPIIRRAYESSDGSSADSEDESNY
DL*

>g9400.t1.2.5bbdf93f
MAKAILLLLHDSSSSSSNDNFTTGSNTISGYSVEGIVVIVVVAVVMFLLLLILFILACKF
KPWRRFLSSSSVASRSRTIKADDLHRPLFSEDLNVVHGQSNAFAGNYAPQQADQQTRGDL
SSPWTQGAVHNQRAHSKSPQLTHSDSFVLDIPDNSEDGIVGQTLKRPLVTNQLLEAQKIC
IKDNLKCIPRFDIDKDRSRQFLPKYKEDQRSVLMLEVISGPSQGTRYSVESSNTSRLPFT
LGRVSPSDLLVKDSEVSGKHAMINWNPNKLKWELVDMGSLNGTLLNSQPVNHQNSGSRQW
GNPVELASGDTLTLGTTSDIFVQITCENECQIPFGVGVASDPMSLRRGAKKLPMEDVCYY
HWPLPGIEQFGLFGICDGHGGAGAATSVSQVMPQMVANILSDSFRREKVLSQRDASDVLR
EAFSQTEAYINHYYEVCTQHIFSLLIFFTYCFCHLMHMCTLCVNLWLFYFTYHICLEFPF
ANYFYSACFY*

>g5100.t1.1.5bbdf937
MSTNNSESRKMGDKENMHFVLIHGACHGAWCWYKLVTLLRSNGHKVTALDMAASGVHPKR
VEELNSFSDYCEPLMAFMADLPPDDRVILVGHSMGGITISLAMEKFPKKIAVAVFLAAFS
PGPDVPVRTLSQEYARRLDSAMDNNHGLGNGEDKPPTFLFGPKFLSIKLYQLSPPEVSIL
SFIGDIFPGSNYTFTNL*

>g12796.t1.3.5bbdf935.1.5bbe19fb
MRAQYMQTKYGKSNTTSDASLQVYPEGANKSASSNTSILVLAPKAHALTKIEETKKSDSL
PLLVANPQDNSADNQINSHSDEPPWKKCKRFQIPWRTPPEIGIIFYWRVGAGENSKEVEV
QKKRIHRERETVYKTFQEIPSDPKEPWDREIDYDDTLTAEIPIEQLPDVEYSEASVSPRE
NERTVGTSGNSSSLVSGGSMPEPDLELLAALLKNPELVFALTSGQAGNLSNEETIKLLDV
IKANEMNSLASTTASFGKGKPEEKVRVSLPSPTPSSDPVTSAWKPDYAKNPFSQQKTTLN
NNEILGIPGSAAAVCSQENIPASNGVQSHALPTRAMVAEPSTTFSQIAHAIPHPLPYEEK
LRANNLTQPQILPATVMATQQPATVQQLAQQKLPQVSHEQRLHPLASSLHQNIPAYASDA
QLMSSELLLNTSNTSLSSSSLLTNSVNGASPSAQIDSLAIVNPSAMSLVGGTTRQQIEIQ
PSYAPEAPLAHSWGSRLDMDQISRCQNDLNPNKNETFFGVPVRSPVGRGSWEKNDLMDEL
DFELWSPEHSPMRSHGYMPGWNFQEPRVNPGQSYRRERPNYIRTGYPPSSGYHNKSGNKR
WRDRRR*

>g29710.t1
MGRGADPVNCLGGDGEALELEFAGFLFAVLCKILWAEICRFWWPQFAGYLAGIWISVVGI
CRFSFCCFVQDFGCFAGFGGWNLQVSWLKFAGFLAVLCKNLGLKFVGFVGWNLQVSWLEF
AGFLAILCKXXXXWLFCARIWG*

>g52764.t1
MQPFSCLPFTFFLLLCSLLNLQYLTAKAASCHPDDEAGLLGFKSGITSDPSGMLKSWKSG
TDCCTWQAITCLDGTRVTALYLSAQLQNSTQILSGTISPSLSKLQFLDGIYLINLRNLTG
PFPNFLFSLPRLTYIYIENNKLSGRIPENIGNVKQLYAFSLQGNKFSGPIPSSISQLTQL
SQLRLGNNLLTGSIPLGIQNLKNLTSLTLDGNQLTGTIPDFFTAFPTLFNLNLAHNRLTG
KIPASIAALAPNLRYLELGHNFLSGQIPDFLGKFRALDTLDLSWNQFSGVVPKTFSNLTK
IFNLDLSHNSLVDPFPAMKVKGIESLDLSYNQFHLVNIPAWVTSSPIIYSLKLVKCGIKL
KLDDWNPAETYFYDYIDLSENEITGSPFKLLNRTEYLKGFYASGNKLNFKLESLKLPKTL
KDLDLSRNLIRGMVPNAVSGLEKLNVSHNHLCGRLPKTKFPASAFAGNDCLCGSPLPACK
*

>g7836.t1
MDVEDSRFAASADGPHNQSPSPGKSPPPSPPPPPPPDHDEKTIHVKFLLSNAEAGSVIGK
GGSTINDFQTRSGARIQLSRNFEFFPGTSDRIVMVSGIIDDVLKGVDLILSKLLDEFYVE
EGEGDPRFKVRLIVPNGSCGGIIGKGGSIIKSLIEESRAGIKISPLDSSFPGLYDRLVTV
NGTLGEQMRAIELILLKLAEDPHYVQSVNAPFPYAVPVACNGMSYASNGVAGKFHNTRFH
NKEERSNSVTIGIADEHMGLVVGRGGRNISEISQLSGARIKISERGDFMSGTSDRKVTIT
GSQRAIHVAEAMISRKVSSVSER*

>g42538.t1
MTGYWIPKGIYTIRNILAVDMGSCISTASSEILNAENSQENVIYYGDTDYTNESQMIVGS
VHSHEGSKGLNQDAAILYKGYGMEDGAFCGVFDGHGYYGHTISKMVRNRLPSLLLNQMNA
MAKITSSPKYNEKLDGEVQFDKKFNKWKEAFLSAFKVMDKEIKLLENVDCSCSGSTAVVV
VRQGEYIIIGNLGDSRALLGTQSENGIVPVQLTTDLKPGLPMEADRIRKCNGRVFALKEE
PHIQRVWLPLDDSPGLAMSRAFGDFLLKNHGIIAIPEVFYHHLSQNDQFLVLATDGVWDV
LSNDQVTSIVSSAANEAAAAKAVVDASITAWKQKFPNSKRDDCTVLCLFLQKSQPSSFT*

>g29729.t1.3.5bbdf940
MAYTAPDHSIQPRDVCIVGVARTPMGSLLGSLSSLSATKLGSVAIHSALKRSNVDPSLVQ
EVFFGNVLSANLGQAPARQAALGAGLPYSVICTTVNKVCASGMKATMLAAQSIQLGINDV
VVAGGMESMSNAPKYLAQARLGSRLGHDTIIDGMLKDGLWDVYNDFGMGVCAELCADQHN
ITREEQDSYAIQSFERGIAAQRSGAFAWEIAPVKNAGGKGKTPIIIDKDEGLGKFDASKL
KKLSPSFKRNGGSVTAGNASSISAVTSGGILILDSDGAAALVLVSGEKALKLGLKVIAKI
RGYADAAQAPELFTTAPALAIPKAISNSGLEQSHIDYYEINEAFSVVALANQKLLNLNPE
KLNVHGGAVSLGHPLGCSGARILITLLGVMRQRNGKFGVASVCNGGGGASALVIELMPVT
WVMRSLL*

>g50787.t1.1.5bbdf936
MASRSTRSRRPLPLQQPESQMRAKWTSALTKVLVDLLVEQVHQGNKRNKSFDKKAWECVC
EDFREKTGLTWDNEQLKSRYAALRKHYVVVKSLLDHGDFQWDQATGVIKATDEAWDGYIK
EHPDSESVRSSGCPMYKQLCTIFSLPGTRGKYSRSNGSYKHGGTPSISDPQPLSAYQEDL
SNSGSDQGSDTADEQENLQSTVASRVVGQKRGRKGIDGVIAKAIMEMAAASKLRAAAIKK
FNERYSITDCVRALDELQGVSDQIYYAALDLFNNRIARETFLSLKVDKRLTWLSAKCLGP
TNSHIA*

>g76170.t1.5.5bbdf934
MSLLGFENRYLHSLASAEEDFLIRKILMTHDPSGCQLDTQLLLRAVKNIIHCAGPISEED
SHPENVAPGLCDAEAIGLQNSLGYTIFRISHEILSRCFDEGDLHSKTIFLFDMLGKFKWD
AKLILVIAAFFTHYGVFQLIVQLQSHNPLAALVALLRQVPCDLSGFRAQFKAFTLLVKTI
MDLSKVIIEFESLPLQQELLEYKAISVVKSKIYLASYWIFRSSLACFSLITGLRTRKHDQ
EFKFYKNCYMDHVQFSIQVKSLVWQPERAG*

>g36522.t1
MPSETVNGQLPSIIEGSKNVVPSTSSGLSQASSKSAEVPPTNVITNTSEGENSEKELRPN
SIGENRNDSPPDDSNPIDRKRKKYHRHTPHQIQEMEAFFKVCPHPDDNQRKQLSRELGLD
PLQVKFWFQNKHTQMKTYLERADNARLRAENEKLRAENMKYKEALAKSCCPNCGGAQALS
EFSPNEHQLRLENAQLREEVELITSSTTKFVGTPYANITLESPSVIPNTFEVQGGGFKGQ
PDNTGDITGADELLKSLTGSTDFDKPIVLEIAVSAVEEVIRMSEVKLPLWIQTMDLRKYV
LNEDAYYLMFPGAITLKQAGFKTEASRETDIVKMDPTKLVEVFVDTEKWLAMFSSMVSRA
FVLEVISVGVEPGNCDGALQVISAEFQVLTPTVPTREFIFIRHCKQLSENAWAVVDISCD
SLFSSIPLGRCQKRPSGCIIEGLPNGSSKVTWIEHAEVDDQDVHYLGRPFVDSGLAFGAQ
RWVAVLSQQCDRLANTMVIDFPPNDINDIEARKNFLQLSERMVLNFYGGVTSSTAYSWIN
LYGSGNEETRIMTKNHGNDPNNPSGTVLNATTCFWLPVPQKIVFEFLRDESSRNEWDILC
NGGGIQKLMHITNSQEAGNCVTLMRVSGSNLSQGEVMILQECSSNPTASSIIYAPVDNVA
IKRFLGGENPDHVVVLPSGFTIFPSGAPTLIQDRATGGVGVIGSLVTLALQILVDSVSTT
KLSFASISVIKGLVEDTKLKIRAILAPNNA*

>g20766.t1.1.5bbe19fa
MVVGLGDLGVGLDGGSRLIRIPILITMLRLVGFLISGTDLLLGGRHLYPEESSHGFVPSR
PSDRMLDDENCRPSGSAKYSRSSRESRVPFGQKDWKVQSWEATPSPNAPGRPLDASDQQR
SVDDMQTCTSSQPHSDSANSWDHSHLKDQHEKSGGLNALGNSGQRLERENSLGSIDWKPL
KWTRSGSLSSRGSGFSHSSSSKSMGADSNEMKAEVQPSNVSPVQSPGDATTAIAASAAVY
ETSAVPSEETNSRKKPRLGWGEGLAQREKKKVEGVDDATVKNGMINCSSREHVQLHSLHQ
ADKSPRITGFSDCASPATPSSVGCSSSPGLEEKQFIKVGNVDNDASTLSPSVVSQNHIEE
STFNLETLDLAQSSHVNFAIIELLQSDELSSIDSGYVKSTAINKLLVWKADVLKKLETTE
SEIDRLEVEFKSFTSIRESSCPHPAVSSSLPMDCLSKPAEEPDVTSNVTHRPVPLDLGSS
GDNDVEKMTDLLVDERAEVKDEDVDSPGSATSKFVEVTSSGKDVFPSEPENHIERFSNTD
IAKPENLESSYFSDRVHEDKEAEISDHGDVSQLTGDSPLQLDEISVRDDREHKLCESIFT
SNKLSAIRAGEVFNKLLPTALCKFDMSSIVTAPSLVSNSRVKEKYLRKRRFQQFKERCIA
LKYRALQRLWKEDIRSISMRKFRVKSHRKLDLSLRMVHNSSQKHRSSFRSRISSIAGNVT
TGHHTEMINFIGKLLSDSLVKPCRDILKMPAMILDKKEKMVSRFISSNGLVEDPCAVEKE
RSMINPWTSEEKEIFMDKLAAFGKDFTKIASFLVHKTTADCVEFYYKNHKSDCFKKTKKY
PEFAKQGKIHSANTYLVASGKRWHSEANAASLDILGTASAIAANADNGMEIEQTCTSKYL
LGRSVDYKTSKGDNGLLERSSSLDGDNERETVAADVLAGICGSLSSEAMSSCITSAGEGY
HEWKCQRLGSSSRLPLTPEIIQDVDDETCSDESCGEMDPTDWTDEEKSIFIQAVSLYGKD
FAMISRCVSTRSRDQCKVFFSKARKCLGLDVICPGSGNVVRHNAHCGSSDTDDTCLVETG
SLILNEKSGVKLTVDLPSPEVKMNTEPNSTGLANVKPDLNQLEGNNGTGDKASVEIGLIS
KNLIDNSQMEDKSEQEVGGNGDIQMVPSGAAVAVQDQGTVVISTSEAEQVVGETSDNANT
SDIQVHGRAVDKLAEHLDAELEELSPVSLESSIDDRKEKNDVNLNDVNGMDQPMKSTPHE
GVSGDQQNGDLESASARQPGVIPLQQNSISISINSAPQSCSLICGKTPNEGTSDLQVVNI
SGEKGYQAATRVEEKLVYESSLLGSINPAQILRGYPVPVSTTREVNGDSSCRISVTPQGI
PKLDKNFQQDRHLACDSYLQRCNGAKHQSSIAELPFKFREHSRDGNLMYHSGSPSDAEKA
GRNGDVKLFGQILTKPSSQRKSSPSISQNGDTENQQSKIGEPFSTKVTGDLAVGGNLSQT
KLDRNNLLGSENLPVRSFGFWDGSRIQTGFQSLPDSAMLLAKYPAAFGSYLMSSSKMEQL
PLPGVKNGERSLNGSTVFPAREIGSSNVSADYQAYRNRELQPFTRDMKQRQDVILSEMQR
RNGFDVISGVQQQAIGMVGINVVGRAGILVGGQCSGVSDPVAAIKMHYSKAEQLSGGQNG
SIIGEDDSWRGKGNIGR*

>g49433.t1
MVSNNNLSGVIPIDLGEASLLRRIDLSSNQFSGRIPKSLGKLTSLFELKLDDNNLAGSIP
SEIGNLTKLQSLNLASNNLEGEIPKELGQCIQILFLNLSNNQLSGSIPFNTGDIRALQLL
DLSQNKLKGEIPRQLGELQRIETMNLSHNEISGSIPSSFEQCFSLVSLNISYNKLKGPLP
VITAFQNAPFDALRNNDGLCGNASGLKHCSELISNKTTKDNSRSVAGLVVSLSLGGLLFL
IVLIGVFFLSLSKRKRMKIEPRIPVEGLFAIWSFDGKMVYRNIVEATEGFNSKHCVGEGG
SGSVFKVEFSNGQKVAIKKLHSQDERGLINLKSEIHALTKIRHRNIVKLYGYCLHARHSF
VVFEFLEGGSLLEMLKNDDQAQKFEWNKRVSLVKGVANALSYLHQDCSPPVVHRDISSKN
ILFDSEYEAHVCDFGTAKLLNSGSSNWTSFAGTYGYSAPELAYTMEVSEKCDVYSFGVVA
LEVIMGKHPGDLICSLSSFSTVHHLLLKDLMDQRLAPPTTTVAEEIILVAKLALLCLNPS
PRSRPTMPQVSQRLSKEETPAKRLFPNVTIGQLFDNSFFITI*

>g27640.t1
MDFHDLKRKELQELCKKHKIPANLTNLEMATRLTALLTGNEKPLTRGRRSCLKGLEDSVS
ENESDVEKRPAKKVRFSPQNEMIEFEKSEVKVLERRNQGRRKSVMNHSKGSGRENGSHVA
VVDEGVGRVTRSRRGKVIEGSEVESMRGGKKGMKDDALKDRLPSAAGVVGTSRDAVMDGG
ARRKVTRSRKVKSIEGTVVEIKGGRRGKKGDDSKGKLTSAAADNVSLVHATNEELVELGK
RSLRNRVVGERKRGNNIVEKGSRQNEEHVVARKRSLRNMEPKDEEETENEDAEKGSTKNG
SHRIDKGHNDIVRTKSTEEESEGIQPEKVLRRSRRHVVEVDYHNLVSENVRKIEKVGKGR
SRSVVFVELKEGSGVDHISGMVVKEGSPAENNLWRSERNAVKPEGLVTMEQIDDVANVND
KKETKKRRRDAIGQEQVVKVDGNSVEVPLRRSRRNTERSETVIPTIARGKVAQKEKGRSK
KTKGEVEDSFIEKILTIEDLPGPEPELMMPEVAKNNVMDNFNDTAIDLVGCLSDIESADA
SESNFGEEDKDSKPVSDTSVKNDDYSFTNNRVQKKAPDANVKSVHLPLDDNDVQKQGGKA
YTDEVKMGENDSEQALYLRKTPLTVKNNSLERRVCSDVIVELNDVEGITGRIISETNCIS
VRELTKEQQVPGTISDGGQLNLEESDCWDHENLILPNAVCEVATTDTIDGCTLDAAATSL
KDADENKKEELTGTLHSTETLKQRKEFMPIQRNSFEAQNLSATDTNFNHHALAFSVDAKF
VDDSHSKIECEISDDCCQPNASDAFRINATSELQDGNVGNGVEINQPVDLQGKDFVATPI
SAKAVENVSEFSESGFGSRMADPSKCNLTLELQDDLNCEVTEESPDTMGLETHSELRAQS
PSKQGKGSVEAELCEDGHNLVESNNHEDIGHLEHQDDALDYSCQKDQGVTEGEDFVAISD
AQGVVLLLHSSESIQISKEAQCTEIELSASKSSSISTIPANSSSMLKYQAFGTTIENEHC
SLTNGNAEYEGYAAGNEVEKKEEVPMQEPYTMKMPSTIEDDALERCNMSTDEGSKGVTGV
LNDQQGPMEESTEYGSNFKSGCKVAIGRQKKVYIGEEDNLVKNNCNALENHLNLIAVSEA
TTTAIVDDCLPVTVDTPWKNRAENHQGENTSTMNSRKTLKQTEESTPVQRTVCEAHNPSA
SETTLDHLELNTSGKSKEPVPDASRKMLHDRNVNGRDIFVQPSSLQGTVFMSTQICSTTV
ETRTEFSENFSHITRAESPKSNFNFEFLDFTEDSSFTCESKSSPLPDNSLQKQGASTDNV
GSDKQSAQRTQSPRKQRMAVDGGFVVEAYTALEDVRNHIEAKFEEIEHLRIQDTASDDCL
QHTELDSSTSKYGLEDMQNHVEAKFGDVEHLRDQDTAGDDCLQHTELDSSTRSKYGFIQD
QGVSNAEDTVETADLHLVAEAYTALEDWQNHVEEFKFKEDDHLKDQETALDDFLQYTELE
CSAISKFIFVQDQDVSSAGDAVEIADSRLSPPGVATHIIEGRQREIELSTRKCNSMIKTP
TNSNFILECQRM*

>g58076.t1
MDGNKDEALRCIGIAKEAIASGNKQRAVKFIRIAQRLNHNLSVDDLLAACEDLDSSSASP
SSSVKGGVSVRNEAGGVKVDGVSNGERNYTEEHVQLVKKIKSKHDYYAVLGVEKSCSVEE
IRKAYKKLSLKVHPDKNKAPGSEEAFKKVSKAFKCLSEDDSRRQYDQTGLVEEFEHNQQY
NVRRRRRTTSHGFHEDDFDPDEIFRSFFGQSDMFRTAHVYRSRSADGQQREGLGGNGPNL
MLLLQLLPFLLIILLAYFPFSEPEYSLQKNNTYQFRKETEKYGVEYFVKSSEFDHNYPLE
SPGRENIESNVIRDYKNMLGRYCHIELQRRQWNRKYPTPHCDRLQEFGIV*

>g71147.t1
MHTPYPTPITPTQTRIGWVGIGVMGSAMASRLLSAGFAVSVYARTPSKVGPLQSKGARLA
SSLADLAHSSDVVFTMLGHPSDVREIVLDNLVPSLNPNSVVVDHTSSHPTLAKQIYDSAL
EKHCHSVDAPVSGGDIGARDGKLAILAGGNEDVVKWLKPLFDEMGKVTYVGGPGRGQHCK
IANQITVGANLLGLSEGLVFAEKAGLDKSKFVEAVKGGAAGSMVMELFAERMISKDFKPG
GFAEYMVKDLGMGVDVGAEEGDEVVVLPGAALSKQLFASMVANGGGKLGTQGLISVIEKI
NGS*

>g37849.t1.1.5bbdf93f
MSFKEHCGRKNLVPMEVDGPLRQCSPGSSVYKGELFTPGARKASATVFNLNKHVQNVLRT
RLASGFQKCFIILTNRLQGKDAVMTQGLNTSTLSAYIGSETIRKIFKKYNQVHGPTNGSK
CKTEFQNVQLEDLSSPCLCELMASHINVKERKNRIIPGQYDECKLQLSEGRSSLSITLSN
SRVLDIDLYCSICLETFFDPVSLTCGHMFCYMCACSAGSVTTFEGIKAADSKSKCPLCRK
EGVFRSAVRMSQLSVLLRRKPS*

>g70681.t1.1.5bbdf937
[truncated: 32,640,038 more chars]
